# Supplementary material for: Blue poo: impact of gut transit time on the gut microbiome using a novel marker
Source: HighWire-hosted journal article supplement (doi:10.1136/gutjnl-2020-323877), 2021-03-15

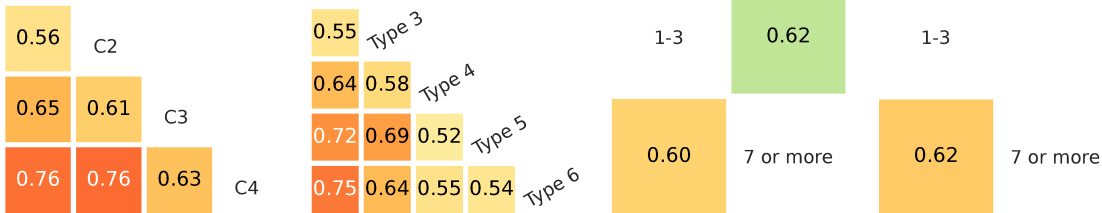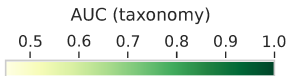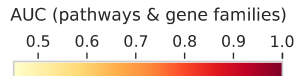

Supplement: gutjnl-2020-323877supp004_data_supplement.pdf [file gutjnl-2020-323877supp004_data_supplement.pdf]
