# Supplementary material for: Blue poo: impact of gut transit time on the gut microbiome using a novel marker
Source: Gut. 2021 Mar 15;70(9):1665–74. doi: 10.1136/gutjnl-2020-323877 (PMC8349893; doi:10.1136/gutjnl-2020-323877)
Supplement: Supplementary data [file gutjnl-2020-323877supp001.xlsx]

## Sheet: Demographics
	Age			Waist/hip ratio			BMI			Weight			Height
	Total	UK	US	Total	UK	US	Total	UK	US	Total	UK	US	Total	UK	US
mean	45.5	45.9	42.1	0.84	0.84	0.84	25.9	25.8	26.2	73.6	73.4	75.5	168.7	168.6	169.6
median	46.7	46.9	41.8	0.84	0.84	0.84	24.9	24.7	25.4	71.3	70.9	73.9	167.8	167.7	168.3
standard deviation	11.9	11.7	12.8	0.08	0.08	0.08	5.1	5.2	4.7	15.4	15.5	14.8	9	9	8.6
