# Supplementary material for: Blue poo: impact of gut transit time on the gut microbiome using a novel marker
Source: Gut. 2021 Mar 15;70(9):1665–74. doi: 10.1136/gutjnl-2020-323877 (PMC8349893; doi:10.1136/gutjnl-2020-323877)
Supplement: Supplementary data [file gutjnl-2020-323877supp003.xlsx]

## Sheet: PERMANOVA
Classes	anosim transit time classes		adnonis2 transit time classes			adonis2 transit time value			anosim Bristol stool score		adonis2 Bristol stool score
	R2	Pr	R2	F	Pr(>F)	R2	F	Pr(>F)	R2	Pr	R2	F	Pr(>F)
C1 vs. C2	0.0766728	0.011	0.0029876	1.50127	0.08	0.00447995	2.25456	0.008	0.0064233	0.384	0.0219577	1.85592	0.001
C1 vs. C3	0.0708895	0.009	0.00868219	2.30342	0.006	0.00913286	2.42408	0.008	0.0688513	0.002	0.0332811	1.78331	0.001
C1 vs. C4	0.170581	0.001	0.030397	7.86885	0.001	0.0312236	8.08972	0.001	0.115266	0.001	0.0385122	1.64225	0.001
C2 vs. C3	0.00806375	0.283	0.00375933	2.2943	0.006	0.00432402	2.64042	0.003	0.00661378	0.368	0.0167678	1.71391	0.001
C2 vs. C4	0.0560377	0.005	0.0204197	12.4238	0.001	0.0219714	13.3892	0.001	0.0245794	0.074	0.0217277	2.18771	0.001
C3 vs. C4	0.0267323	0.001	0.0124793	4.52404	0.001	0.0145732	5.29437	0.001	0.0736095	0.001	0.0287578	1.74201	0.001
