# Supplementary material for: Blue poo: impact of gut transit time on the gut microbiome using a novel marker
Source: Gut. 2021 Mar 15;70(9):1665–74. doi: 10.1136/gutjnl-2020-323877 (PMC8349893; doi:10.1136/gutjnl-2020-323877)
Supplement: Supplementary data [file gutjnl-2020-323877supp005.xlsx]

## Sheet: Transit time species C1 vs. C4
Class 1	Class2	Class 1 prevalence (%)	Class 2 prevalence (%)	Class 1 total	Class 2 total	Class 1 positives	Class 2 positives	Class 1 median relative abundance	Class 2 median relative abundance	Effect size	pvalue MWU	pvalue MWU FDR	pvalue MWU Bonferroni	oddsratio Fisher	pvalue F	pvalue F FDR	pvalue F Bonferroni	Taxonomy
C1	C4	72.1519	85.0575	79	174	57	148	0.42277	2.50204	-2.56516	9.26775e-07	2.55378e-05	0.00045968	0.45516	0.0235875	0.15394	1	k__Bacteria|p__Verrucomicrobia|c__Verrucomicrobiae|o__Verrucomicrobiales|f__Akkermansiaceae|g__Akkermansia|s__Akkermansia_muciniphila
C1	C4	30.3797	28.1609	79	174	24	49	0.11687	0.54304	-2.21615	0.425546	0.469046	1	1.11317	0.765228	0.960515	1	k__Bacteria|p__Bacteroidetes|c__Bacteroidia|o__Bacteroidales|f__Bacteroidaceae|g__Bacteroides|s__Bacteroides_intestinalis
C1	C4	32.9114	40.2299	79	174	26	70	0.04058	0.1818	-2.16351	0.0532611	0.129525	1	0.728841	0.327861	0.653559	1	k__Bacteria|p__Actinobacteria|c__Actinobacteria|o__Bifidobacteriales|f__Bifidobacteriaceae|g__Bifidobacterium|s__Bifidobacterium_animalis
C1	C4	53.1646	44.8276	79	174	42	78	0.003605	0.01567	-2.11993	0.429965	0.47182	1	1.39709	0.225044	0.539959	1	k__Bacteria|p__Firmicutes|c__Erysipelotrichia|o__Erysipelotrichales|f__Erysipelotrichaceae|g__Erysipelatoclostridium|s__Clostridium_innocuum
C1	C4	21.519	24.1379	79	174	17	42	0.05786	0.24512	-2.08285	0.235993	0.336358	1	0.861751	0.748883	0.960515	1	k__Bacteria|p__Bacteroidetes|c__Bacteroidia|o__Bacteroidales|f__Tannerellaceae|g__Parabacteroides|s__Parabacteroides_johnsonii
C1	C4	24.0506	33.908	79	174	19	59	0.00102	0.00422	-2.04867	0.0287617	0.089722	1	0.617232	0.141895	0.401527	1	k__Bacteria|p__Firmicutes|c__Clostridia|o__Clostridiales|f__Ruminococcaceae|g__Pseudoflavonifractor|s__Pseudoflavonifractor_capillosus
C1	C4	29.1139	54.023	79	174	23	94	0.00323	0.013045	-2.01389	2.5669e-05	0.000439028	0.0127318	0.349544	0.000236865	0.0100324	0.117485	k__Bacteria|p__Firmicutes|c__Clostridia|o__Clostridiales|f__Lachnospiraceae|g__Eisenbergiella|s__Eisenbergiella_tayi
C1	C4	31.6456	36.2069	79	174	25	63	0.0054	0.01626	-1.5903	0.0855775	0.179099	1	0.815697	0.569122	0.84264	1	k__Bacteria|p__Firmicutes|c__Erysipelotrichia|o__Erysipelotrichales|f__Erysipelotrichaceae|g__Dielma|s__Dielma_fastidiosa
C1	C4	27.8481	50.5747	79	174	22	88	0.303315	0.863915	-1.51007	2.49551e-05	0.000439028	0.0123777	0.377193	0.00095954	0.0196003	0.475932	k__Archaea|p__Euryarchaeota|c__Methanobacteria|o__Methanobacteriales|f__Methanobacteriaceae|g__Methanobrevibacter|s__Methanobrevibacter_smithii
C1	C4	51.8987	64.9425	79	174	41	113	0.16495	0.43758	-1.40752	0.00728985	0.033297	1	0.582441	0.0528842	0.238459	1	k__Bacteria|p__Bacteroidetes|c__Bacteroidia|o__Bacteroidales|f__Bacteroidaceae|g__Bacteroides|s__Bacteroides_cellulosilyticus
C1	C4	26.5823	39.6552	79	174	21	69	0.3201	0.82953	-1.37377	0.00646883	0.0308514	1	0.550975	0.0481231	0.22951	1	k__Bacteria|p__Bacteroidetes|c__Bacteroidia|o__Bacteroidales|f__Bacteroidaceae|g__Bacteroides|s__Bacteroides_sp_CAG_144
C1	C4	94.9367	98.2759	79	174	75	171	0.36789	0.91142	-1.30884	8.34825e-05	0.00108967	0.0414073	0.328947	0.209367	0.519231	1	k__Bacteria|p__Bacteroidetes|c__Bacteroidia|o__Bacteroidales|f__Rikenellaceae|g__Alistipes|s__Alistipes_finegoldii
C1	C4	29.1139	60.3448	79	174	23	105	0.01602	0.03941	-1.29869	8.2085e-08	4.14072e-06	4.07142e-05	0.269898	5.99705e-06	0.00148727	0.00297454	k__Bacteria|p__Firmicutes|c__Clostridia|o__Clostridiales|f__Ruminococcaceae|g__Ruminococcaceae_unclassified|s__Ruminococcaceae_bacterium_D5
C1	C4	26.5823	24.7126	79	174	21	43	0.27015	0.66185	-1.29274	0.451211	0.476171	1	1.10305	0.756901	0.960515	1	k__Bacteria|p__Bacteroidetes|c__Bacteroidia|o__Bacteroidales|f__Bacteroidaceae|g__Bacteroides|s__Bacteroides_faecis
C1	C4	96.2025	100	79	174	76	174	0.05879	0.140935	-1.26139	1.51712e-08	1.04774e-06	7.52492e-06	0	0.0296495	0.169514	1	k__Bacteria|p__Firmicutes|c__Clostridia|o__Clostridiales|f__Ruminococcaceae|g__Ruthenibacterium|s__Ruthenibacterium_lactatiformans
C1	C4	62.0253	72.9885	79	174	49	127	0.02574	0.05934	-1.20499	0.003714	0.0206983	1	0.604462	0.104379	0.35219	1	k__Bacteria|p__Bacteroidetes|c__Bacteroidia|o__Bacteroidales|f__Odoribacteraceae|g__Butyricimonas|s__Butyricimonas_synergistica
C1	C4	32.9114	47.7011	79	174	26	83	0.823465	1.8607	-1.17607	0.0125592	0.0498348	1	0.53785	0.0292538	0.169514	1	k__Bacteria|p__Bacteroidetes|c__Bacteroidia|o__Bacteroidales|f__Bacteroidaceae|g__Bacteroides|s__Bacteroides_stercoris
C1	C4	39.2405	37.931	79	174	31	66	0.03416	0.075025	-1.13506	0.347145	0.427256	1	1.05682	0.889364	1	1	k__Bacteria|p__Bacteroidetes|c__Bacteroidia|o__Bacteroidales|f__Rikenellaceae|g__Alistipes|s__Alistipes_onderdonkii
C1	C4	56.962	78.1609	79	174	45	136	0.26109	0.55559	-1.08947	2.0231e-05	0.000385946	0.0100346	0.36981	0.000862419	0.0195353	0.42776	k__Bacteria|p__Firmicutes|c__Firmicutes_unclassified|o__Firmicutes_unclassified|f__Firmicutes_unclassified|g__Firmicutes_unclassified|s__Firmicutes_bacterium_CAG_110
C1	C4	79.7468	92.5287	79	174	63	161	0.1634	0.34395	-1.07379	2.96246e-05	0.000474049	0.0146938	0.317935	0.00505625	0.0597119	1	k__Bacteria|p__Firmicutes|c__Clostridia|o__Clostridiales|f__Oscillospiraceae|g__Oscillibacter|s__Oscillibacter_sp_CAG_241
C1	C4	74.6835	87.3563	79	174	59	152	0.00962	0.02005	-1.05949	0.000104476	0.0012955	0.0518201	0.426974	0.0171583	0.124259	1	k__Bacteria|p__Firmicutes|c__Clostridia|o__Clostridiales|f__Clostridiales_unclassified|g__Intestinimonas|s__Intestinimonas_butyriciproducens
C1	C4	81.0127	86.2069	79	174	64	150	0.237405	0.47804	-1.00978	0.000134691	0.00159063	0.0668066	0.682667	0.347531	0.662982	1	k__Bacteria|p__Bacteroidetes|c__Bacteroidia|o__Bacteroidales|f__Rikenellaceae|g__Alistipes|s__Alistipes_shahii
C1	C4	22.7848	33.3333	79	174	18	58	0.0055	0.01107	-1.00915	0.0257867	0.0837938	1	0.590164	0.104243	0.35219	1	k__Bacteria|p__Bacteroidetes|c__Bacteroidia|o__Bacteroidales|f__Bacteroidaceae|g__Bacteroides|s__Bacteroides_nordii
C1	C4	83.5443	95.977	79	174	66	167	0.006535	0.01232	-0.914743	3.64723e-05	0.000565321	0.0180903	0.212805	0.001644	0.0291222	0.815422	k__Bacteria|p__Firmicutes|c__Clostridia|o__Clostridiales|f__Ruminococcaceae|g__Ruminococcaceae_unclassified|s__Clostridium_leptum
C1	C4	68.3544	68.3908	79	174	54	119	0.0079	0.01487	-0.91248	0.232402	0.332195	1	0.998319	1	1	1	k__Bacteria|p__Firmicutes|c__Erysipelotrichia|o__Erysipelotrichales|f__Erysipelotrichaceae|g__Holdemania|s__Holdemania_filiformis
C1	C4	30.3797	25.2874	79	174	24	44	0.001405	0.002525	-0.845713	0.266839	0.359653	1	1.28926	0.44487	0.750529	1	k__Bacteria|p__Firmicutes|c__Bacilli|o__Lactobacillales|f__Streptococcaceae|g__Streptococcus|s__Streptococcus_sp_A12
C1	C4	22.7848	29.3103	79	174	18	51	0.00204	0.00364	-0.835369	0.100939	0.202859	1	0.711668	0.360759	0.675232	1	k__Bacteria|p__Firmicutes|c__Clostridia|o__Clostridiales|f__Ruminococcaceae|g__Harryflintia|s__Harryflintia_acetispora
C1	C4	20.2532	28.7356	79	174	16	50	0.11427	0.20349	-0.832511	0.054772	0.131349	1	0.629841	0.167565	0.442646	1	k__Bacteria|p__Bacteroidetes|c__Bacteroidia|o__Bacteroidales|f__Bacteroidaceae|g__Bacteroides|s__Bacteroides_finegoldii
C1	C4	21.519	35.6322	79	174	17	62	0.03751	0.0666	-0.828247	0.00723368	0.033297	1	0.495317	0.0281802	0.16705	1	k__Bacteria|p__Lentisphaerae|c__Lentisphaeria|o__Victivallales|f__Victivallaceae|g__Victivallis|s__Victivallis_vadensis
C1	C4	32.9114	41.3793	79	174	26	72	0.00277	0.0047	-0.762775	0.0521221	0.12862	1	0.694969	0.21306	0.523158	1	k__Bacteria|p__Firmicutes|c__Clostridia|o__Clostridiales|f__Clostridiaceae|g__Hungatella|s__Hungatella_hathewayi
C1	C4	30.3797	48.2759	79	174	24	84	0.028125	0.047215	-0.747392	0.00142916	0.00897293	0.708861	0.467532	0.00908605	0.0851009	1	k__Bacteria|p__Firmicutes|c__Clostridia|o__Clostridiales|f__Lachnospiraceae|g__Roseburia|s__Roseburia_sp_CAG_309
C1	C4	39.2405	54.023	79	174	31	94	0.01839	0.029855	-0.699051	0.0109811	0.0469536	1	0.549645	0.0309385	0.173875	1	k__Bacteria|p__Firmicutes|c__Firmicutes_unclassified|o__Firmicutes_unclassified|f__Firmicutes_unclassified|g__Firmicutes_unclassified|s__Firmicutes_bacterium_CAG_95
C1	C4	79.7468	90.8046	79	174	63	158	1.15905	1.87303	-0.692431	0.000943407	0.00632338	0.46793	0.398734	0.0232416	0.153705	1	k__Bacteria|p__Bacteroidetes|c__Bacteroidia|o__Bacteroidales|f__Barnesiellaceae|g__Barnesiella|s__Barnesiella_intestinihominis
C1	C4	60.7595	82.7586	79	174	48	144	0.15268	0.24659	-0.691603	8.91071e-05	0.00113326	0.0441971	0.322581	0.000242719	0.0100324	0.120388	k__Bacteria|p__Firmicutes|c__Clostridia|o__Clostridiales|f__Ruminococcaceae|g__Ruminococcaceae_unclassified|s__Eubacterium_siraeum
C1	C4	34.1772	42.5287	79	174	27	74	0.00741	0.01196	-0.690672	0.0791349	0.169185	1	0.701663	0.216437	0.52624	1	k__Bacteria|p__Firmicutes|c__Firmicutes_unclassified|o__Firmicutes_unclassified|f__Firmicutes_unclassified|g__Firmicutes_unclassified|s__Firmicutes_bacterium_CAG_145
C1	C4	79.7468	91.954	79	174	63	160	0.0658	0.10601	-0.688041	0.000616243	0.00472117	0.305657	0.344531	0.010475	0.0927783	1	k__Bacteria|p__Proteobacteria|c__Deltaproteobacteria|o__Desulfovibrionales|f__Desulfovibrionaceae|g__Bilophila|s__Bilophila_wadsworthia
C1	C4	65.8228	77.0115	79	174	52	134	0.665295	1.0362	-0.639236	0.00304898	0.0171852	1	0.574903	0.0667501	0.264865	1	k__Bacteria|p__Bacteroidetes|c__Bacteroidia|o__Bacteroidales|f__Tannerellaceae|g__Parabacteroides|s__Parabacteroides_merdae
C1	C4	67.0886	76.4368	79	174	53	133	0.04869	0.07537	-0.630365	0.00403771	0.0217685	1	0.628398	0.126488	0.389676	1	k__Bacteria|p__Bacteroidetes|c__Bacteroidia|o__Bacteroidales|f__Odoribacteraceae|g__Butyricimonas|s__Butyricimonas_virosa
C1	C4	79.7468	86.7816	79	174	63	151	0.08343	0.12596	-0.594328	0.0125185	0.0498348	1	0.599752	0.187971	0.480586	1	k__Bacteria|p__Firmicutes|c__Firmicutes_unclassified|o__Firmicutes_unclassified|f__Firmicutes_unclassified|g__Firmicutes_unclassified|s__Firmicutes_bacterium_CAG_83
C1	C4	93.6709	89.0805	79	174	74	155	0.049445	0.07411	-0.583844	0.26964	0.362443	1	1.81419	0.354597	0.671298	1	k__Bacteria|p__Firmicutes|c__Clostridia|o__Clostridiales|f__Ruminococcaceae|g__Flavonifractor|s__Flavonifractor_plautii
C1	C4	82.2785	94.8276	79	174	65	165	3.74181	5.4532	-0.543367	1.90986e-05	0.000378916	0.00947289	0.253247	0.00347497	0.0465834	1	k__Bacteria|p__Bacteroidetes|c__Bacteroidia|o__Bacteroidales|f__Rikenellaceae|g__Alistipes|s__Alistipes_putredinis
C1	C4	49.3671	53.4483	79	174	39	93	0.00119	0.00173	-0.53981	0.152807	0.257797	1	0.849194	0.588196	0.848108	1	k__Bacteria|p__Actinobacteria|c__Coriobacteriia|o__Coriobacteriales|f__Coriobacteriaceae|g__Enorma|s__Enorma_massiliensis
C1	C4	84.8101	94.2529	79	174	67	164	0.69611	1.00612	-0.531422	0.0152598	0.058222	1	0.340447	0.0275181	0.16705	1	k__Bacteria|p__Firmicutes|c__Clostridia|o__Clostridiales|f__Eubacteriaceae|g__Eubacterium|s__Eubacterium_eligens
C1	C4	65.8228	79.3103	79	174	52	138	0.82472	1.18976	-0.528694	0.000628221	0.00472117	0.311597	0.502415	0.0278127	0.16705	1	k__Bacteria|p__Bacteroidetes|c__Bacteroidia|o__Bacteroidales|f__Bacteroidaceae|g__Bacteroides|s__Bacteroides_caccae
C1	C4	51.8987	87.3563	79	174	41	152	0.01416	0.02036	-0.523916	8.27853e-10	8.2123e-08	4.10615e-07	0.156163	3.02647e-09	1.50113e-06	1.50113e-06	k__Bacteria|p__Firmicutes|c__Clostridia|o__Clostridiales|f__Ruminococcaceae|g__Anaeromassilibacillus|s__Anaeromassilibacillus_sp_An250
C1	C4	36.7089	25.2874	79	174	29	44	0.01024	0.014435	-0.495355	0.0346978	0.0994625	1	1.71364	0.0729465	0.280476	1	k__Bacteria|p__Firmicutes|c__Clostridia|o__Clostridiales|f__Lachnospiraceae|g__Blautia|s__Blautia_hydrogenotrophica
C1	C4	55.6962	77.0115	79	174	44	134	0.051685	0.0708	-0.454004	0.000728391	0.00523597	0.361282	0.375267	0.000987921	0.0196003	0.490009	k__Bacteria|p__Proteobacteria|c__Gammaproteobacteria|o__Enterobacterales|f__Enterobacteriaceae|g__Escherichia|s__Escherichia_coli
C1	C4	48.1013	36.2069	79	174	38	63	0.00215	0.00292	-0.441632	0.0634882	0.14715	1	1.63298	0.0961363	0.343048	1	k__Bacteria|p__Firmicutes|c__Bacilli|o__Lactobacillales|f__Streptococcaceae|g__Streptococcus|s__Streptococcus_mitis
C1	C4	84.8101	94.8276	79	174	67	165	0.95498	1.27474	-0.416661	0.00520522	0.0266164	1	0.304545	0.012337	0.105502	1	k__Bacteria|p__Bacteroidetes|c__Bacteroidia|o__Bacteroidales|f__Tannerellaceae|g__Parabacteroides|s__Parabacteroides_distasonis
C1	C4	75.9494	62.069	79	174	60	108	0.0015	0.001995	-0.411426	0.184395	0.291274	1	1.92982	0.0320236	0.173875	1	k__Bacteria|p__Actinobacteria|c__Coriobacteriia|o__Coriobacteriales|f__Coriobacteriaceae|g__Collinsella|s__Collinsella_intestinalis
C1	C4	79.7468	79.8851	79	174	63	139	0.47829	0.63533	-0.409621	0.452952	0.476994	1	0.991457	1	1	1	k__Bacteria|p__Firmicutes|c__Clostridia|o__Clostridiales|f__Ruminococcaceae|g__Ruminococcus|s__Ruminococcus_bicirculans
C1	C4	41.7722	55.1724	79	174	33	96	0.02678	0.035415	-0.403205	0.0100614	0.0441634	1	0.58288	0.0575647	0.247743	1	k__Bacteria|p__Firmicutes|c__Firmicutes_unclassified|o__Firmicutes_unclassified|f__Firmicutes_unclassified|g__Firmicutes_unclassified|s__Firmicutes_bacterium_CAG_94
C1	C4	77.2152	82.7586	79	174	61	144	0.05491	0.072275	-0.396428	0.222819	0.322713	1	0.706019	0.303807	0.64341	1	k__Bacteria|p__Firmicutes|c__Clostridia|o__Clostridiales|f__Peptostreptococcaceae|g__Intestinibacter|s__Intestinibacter_bartlettii
C1	C4	39.2405	52.8736	79	174	31	92	0.28788	0.374645	-0.380057	0.0199442	0.0696078	1	0.575634	0.0571485	0.247743	1	k__Bacteria|p__Bacteroidetes|c__Bacteroidia|o__Bacteroidales|f__Rikenellaceae|g__Alistipes|s__Alistipes_inops
C1	C4	43.038	44.2529	79	174	34	77	0.266795	0.34482	-0.370112	0.496739	0.499472	1	0.951804	0.891859	1	1	k__Bacteria|p__Firmicutes|c__Negativicutes|o__Acidaminococcales|f__Acidaminococcaceae|g__Phascolarctobacterium|s__Phascolarctobacterium_faecium
C1	C4	87.3418	94.2529	79	174	69	164	0.03289	0.041895	-0.349129	0.0448735	0.11839	1	0.420732	0.0773961	0.293042	1	k__Bacteria|p__Actinobacteria|c__Coriobacteriia|o__Eggerthellales|f__Eggerthellaceae|g__Adlercreutzia|s__Adlercreutzia_equolifaciens
C1	C4	87.3418	93.1034	79	174	69	162	0.05024	0.06399	-0.34901	0.0253122	0.0831449	1	0.511111	0.150934	0.41361	1	k__Bacteria|p__Actinobacteria|c__Coriobacteriia|o__Eggerthellales|f__Eggerthellaceae|g__Asaccharobacter|s__Asaccharobacter_celatus
C1	C4	50.6329	66.6667	79	174	40	116	0.046455	0.058735	-0.338387	0.0122528	0.0498147	1	0.512821	0.0178413	0.126419	1	k__Bacteria|p__Firmicutes|c__Clostridia|o__Clostridiales|f__Clostridiaceae|g__Clostridium|s__Clostridium_disporicum
C1	C4	62.0253	73.5632	79	174	49	128	3.15493	3.9881	-0.338094	0.0232198	0.0775283	1	0.586979	0.0759291	0.289699	1	k__Bacteria|p__Firmicutes|c__Clostridia|o__Clostridiales|f__Ruminococcaceae|g__Ruminococcus|s__Ruminococcus_bromii
C1	C4	54.4304	64.9425	79	174	43	113	0.0177	0.0222	-0.32681	0.031729	0.094544	1	0.644789	0.125676	0.389676	1	k__Bacteria|p__Firmicutes|c__Erysipelotrichia|o__Erysipelotrichales|f__Erysipelotrichaceae|g__Turicibacter|s__Turicibacter_sanguinis
C1	C4	32.9114	34.4828	79	174	26	60	0.00423	0.005255	-0.313033	0.374642	0.442434	1	0.932075	0.886394	1	1	k__Bacteria|p__Firmicutes|c__Clostridia|o__Clostridiales|f__Lachnospiraceae|g__Eisenbergiella|s__Eisenbergiella_massiliensis
C1	C4	89.8734	98.2759	79	174	71	171	4.0962	5.05166	-0.302471	0.00105317	0.00687333	0.522373	0.155702	0.00473557	0.0597119	1	k__Bacteria|p__Bacteroidetes|c__Bacteroidia|o__Bacteroidales|f__Bacteroidaceae|g__Bacteroides|s__Bacteroides_uniformis
C1	C4	32.9114	40.2299	79	174	26	70	0.00275	0.00333	-0.276091	0.111671	0.215558	1	0.728841	0.327861	0.653559	1	k__Bacteria|p__Actinobacteria|c__Actinobacteria|o__Micrococcales|f__Micrococcaceae|g__Rothia|s__Rothia_mucilaginosa
C1	C4	49.3671	71.8391	79	174	39	125	0.06766	0.08119	-0.262999	0.000569327	0.00455462	0.282386	0.3822	0.00065811	0.0178282	0.326423	k__Bacteria|p__Bacteroidetes|c__Bacteroidia|o__Bacteroidales|f__Rikenellaceae|g__Alistipes|s__Alistipes_indistinctus
C1	C4	87.3418	95.4023	79	174	69	166	0.62905	0.75465	-0.262633	0.000244346	0.00247571	0.121196	0.33253	0.0322152	0.173875	1	k__Bacteria|p__Bacteroidetes|c__Bacteroidia|o__Bacteroidales|f__Odoribacteraceae|g__Odoribacter|s__Odoribacter_splanchnicus
C1	C4	44.3038	54.5977	79	174	35	95	0.02386	0.0285	-0.256368	0.0498402	0.124852	1	0.661483	0.137578	0.401527	1	k__Bacteria|p__Bacteroidetes|c__Bacteroidia|o__Bacteroidales|f__Barnesiellaceae|g__Coprobacter|s__Coprobacter_secundus
C1	C4	27.8481	21.2644	79	174	22	37	0.00591	0.00703	-0.250367	0.143836	0.252337	1	1.42911	0.264415	0.58549	1	k__Bacteria|p__Firmicutes|c__Bacilli|o__Lactobacillales|f__Streptococcaceae|g__Streptococcus|s__Streptococcus_vestibularis
C1	C4	56.962	68.9655	79	174	45	120	0.08601	0.102295	-0.250159	0.0200684	0.0696078	1	0.595588	0.066183	0.264732	1	k__Bacteria|p__Firmicutes|c__Clostridia|o__Clostridiales|f__Clostridiaceae|g__Clostridium|s__Clostridium_sp_CAG_58
C1	C4	31.6456	28.7356	79	174	25	50	0.01785	0.021065	-0.238924	0.351953	0.429252	1	1.14815	0.657748	0.896272	1	k__Bacteria|p__Bacteroidetes|c__Bacteroidia|o__Bacteroidales|f__Prevotellaceae|g__Paraprevotella|s__Paraprevotella_clara
C1	C4	97.4684	97.1264	79	174	77	169	0.05566	0.06566	-0.238374	0.116436	0.221272	1	1.13905	1	1	1	k__Bacteria|p__Firmicutes|c__Clostridia|o__Clostridiales|f__Clostridiales_unclassified|g__Lawsonibacter|s__Lawsonibacter_asaccharolyticus
C1	C4	25.3165	31.0345	79	174	20	54	0.226475	0.2656	-0.229903	0.149884	0.253728	1	0.753296	0.375251	0.691913	1	k__Bacteria|p__Firmicutes|c__Clostridia|o__Clostridiales|f__Clostridiales_unclassified|g__Monoglobus|s__Monoglobus_pectinilyticus
C1	C4	32.9114	36.7816	79	174	26	64	0.194935	0.223715	-0.198669	0.312622	0.396456	1	0.84316	0.57407	0.844276	1	k__Bacteria|p__Firmicutes|c__Erysipelotrichia|o__Erysipelotrichales|f__Erysipelotrichaceae|g__Holdemanella|s__Holdemanella_biformis
C1	C4	39.2405	27.5862	79	174	31	48	0.00642	0.007365	-0.198112	0.0352274	0.0998446	1	1.69531	0.0788283	0.295402	1	k__Bacteria|p__Firmicutes|c__Clostridia|o__Clostridiales|f__Lachnospiraceae|g__Lachnoclostridium|s__Clostridium_asparagiforme
C1	C4	30.3797	32.7586	79	174	24	57	0.08846	0.10112	-0.192971	0.301751	0.38875	1	0.895694	0.772035	0.960515	1	k__Bacteria|p__Actinobacteria|c__Coriobacteriia|o__Eggerthellales|f__Eggerthellaceae|g__Slackia|s__Slackia_isoflavoniconvertens
C1	C4	29.1139	37.3563	79	174	23	65	0.00864	0.00986	-0.190556	0.131847	0.239547	1	0.688736	0.254464	0.569724	1	k__Bacteria|p__Firmicutes|c__Bacilli|o__Lactobacillales|f__Streptococcaceae|g__Lactococcus|s__Lactococcus_lactis
C1	C4	20.2532	24.7126	79	174	16	43	0.29498	0.3362	-0.188703	0.210248	0.3137	1	0.773717	0.521809	0.814243	1	k__Bacteria|p__Bacteroidetes|c__Bacteroidia|o__Bacteroidales|f__Bacteroidaceae|g__Bacteroides|s__Bacteroides_salyersiae
C1	C4	91.1392	94.2529	79	174	72	164	0.44724	0.509695	-0.188585	0.0473075	0.120951	1	0.627178	0.417968	0.732258	1	k__Bacteria|p__Firmicutes|c__Clostridia|o__Clostridiales|f__Lachnospiraceae|g__Coprococcus|s__Coprococcus_catus
C1	C4	97.4684	95.977	79	174	77	167	0.05017	0.05652	-0.171937	0.46823	0.484848	1	1.61377	0.724347	0.947958	1	k__Bacteria|p__Firmicutes|c__Bacilli|o__Lactobacillales|f__Streptococcaceae|g__Streptococcus|s__Streptococcus_salivarius
C1	C4	29.1139	27.0115	79	174	23	47	0.9117	1.01454	-0.154195	0.418491	0.465408	1	1.1098	0.762634	0.960515	1	k__Bacteria|p__Firmicutes|c__Clostridia|o__Clostridiales|f__Eubacteriaceae|g__Eubacterium|s__Eubacterium_sp_CAG_180
C1	C4	73.4177	70.1149	79	174	58	122	1.97931	2.18841	-0.144892	0.435526	0.473507	1	1.17721	0.654621	0.894468	1	k__Bacteria|p__Bacteroidetes|c__Bacteroidia|o__Bacteroidales|f__Bacteroidaceae|g__Bacteroides|s__Bacteroides_dorei
C1	C4	64.557	62.069	79	174	51	108	0.54208	0.59815	-0.142002	0.418195	0.465408	1	1.1131	0.779337	0.960515	1	k__Bacteria|p__Firmicutes|c__Clostridia|o__Clostridiales|f__Ruminococcaceae|g__Ruminococcus|s__Ruminococcus_lactaris
C1	C4	55.6962	64.9425	79	174	44	113	0.001495	0.00164	-0.13355	0.0727267	0.160725	1	0.678635	0.165342	0.440996	1	k__Bacteria|p__Actinobacteria|c__Coriobacteriia|o__Eggerthellales|f__Eggerthellaceae|g__Enterorhabdus|s__Enterorhabdus_caecimuris
C1	C4	58.2278	39.0805	79	174	46	68	0.04969	0.05424	-0.126402	0.00708265	0.0331414	1	2.17291	0.00623613	0.068736	1	k__Bacteria|p__Firmicutes|c__Clostridia|o__Clostridiales|f__Lachnospiraceae|g__Blautia|s__Ruminococcus_gnavus
C1	C4	35.443	43.1034	79	174	28	75	0.08264	0.08982	-0.120196	0.119541	0.225266	1	0.724706	0.271627	0.596137	1	k__Bacteria|p__Firmicutes|c__Clostridia|o__Clostridiales|f__Clostridiaceae|g__Clostridium|s__Clostridium_sp_CAG_167
C1	C4	35.443	35.6322	79	174	28	62	0.00155	0.001675	-0.111893	0.499136	0.499472	1	0.991777	1	1	1	k__Bacteria|p__Actinobacteria|c__Actinobacteria|o__Actinomycetales|f__Actinomycetaceae|g__Actinomyces|s__Actinomyces_odontolyticus
C1	C4	31.6456	31.0345	79	174	25	54	0.01014	0.010945	-0.110214	0.420841	0.465931	1	1.02881	1	1	1	k__Bacteria|p__Firmicutes|c__Clostridia|o__Clostridiales|f__Lachnospiraceae|g__Lachnoclostridium|s__Clostridium_symbiosum
C1	C4	83.5443	87.3563	79	174	66	152	0.63337	0.680125	-0.102751	0.413667	0.463733	1	0.734818	0.435434	0.742183	1	k__Bacteria|p__Actinobacteria|c__Actinobacteria|o__Bifidobacteriales|f__Bifidobacteriaceae|g__Bifidobacterium|s__Bifidobacterium_longum
C1	C4	20.2532	20.1149	79	174	16	35	0.070735	0.07512	-0.0867728	0.499472	0.499472	1	1.00862	1	1	1	k__Bacteria|p__Firmicutes|c__Erysipelotrichia|o__Erysipelotrichales|f__Erysipelotrichaceae|g__Faecalitalea|s__Faecalitalea_cylindroides
C1	C4	45.5696	66.6667	79	174	36	116	0.002185	0.00232	-0.0864915	0.000454474	0.0036954	0.225419	0.418605	0.00220284	0.0352455	1	k__Bacteria|p__Firmicutes|c__Clostridia|o__Clostridiales|f__Ruminococcaceae|g__Ruminococcaceae_unclassified|s__Ruminococcaceae_bacterium_D16
C1	C4	91.1392	95.4023	79	174	72	166	0.48373	0.5126	-0.0836315	0.237381	0.337367	1	0.495697	0.248785	0.565276	1	k__Bacteria|p__Bacteroidetes|c__Bacteroidia|o__Bacteroidales|f__Bacteroidaceae|g__Bacteroides|s__Bacteroides_ovatus
C1	C4	77.2152	76.4368	79	174	61	133	1.79412	1.84778	-0.0425166	0.481027	0.491937	1	1.0447	1	1	1	k__Bacteria|p__Actinobacteria|c__Actinobacteria|o__Bifidobacteriales|f__Bifidobacteriaceae|g__Bifidobacterium|s__Bifidobacterium_adolescentis
C1	C4	69.6203	78.7356	79	174	55	137	0.08866	0.09093	-0.036473	0.147027	0.253499	1	0.618917	0.152917	0.41674	1	k__Bacteria|p__Firmicutes|c__Clostridia|o__Clostridiales|f__Eubacteriaceae|g__Eubacterium|s__Eubacterium_ventriosum
C1	C4	84.8101	81.0345	79	174	67	141	0.01504	0.01539	-0.0331887	0.274087	0.366375	1	1.30674	0.594879	0.850317	1	k__Bacteria|p__Firmicutes|c__Bacilli|o__Lactobacillales|f__Streptococcaceae|g__Streptococcus|s__Streptococcus_parasanguinis
C1	C4	37.9747	45.977	79	174	30	80	0.003185	0.00324	-0.0247004	0.0729628	0.160725	1	0.719388	0.274102	0.598919	1	k__Bacteria|p__Firmicutes|c__Clostridia|o__Clostridiales|f__Oscillospiraceae|g__Oscillibacter|s__Oscillibacter_sp_PC13
C1	C4	34.1772	36.7816	79	174	27	64	0.47195	0.475085	-0.00955163	0.278174	0.369905	1	0.892428	0.777693	0.960515	1	k__Bacteria|p__Firmicutes|c__Negativicutes|o__Veillonellales|f__Veillonellaceae|g__Dialister|s__Dialister_invisus
C1	C4	72.1519	65.5172	79	174	57	114	0.0016	0.001605	-0.00450139	0.171839	0.277629	1	1.36364	0.314178	0.646607	1	k__Bacteria|p__Actinobacteria|c__Coriobacteriia|o__Coriobacteriales|f__Coriobacteriaceae|g__Enorma|s__[Collinsella]_massiliensis
C1	C4	87.3418	84.4828	79	174	69	147	0.46196	0.46252	-0.00174781	0.366656	0.436118	1	1.26735	0.701374	0.936499	1	k__Bacteria|p__Bacteroidetes|c__Bacteroidia|o__Bacteroidales|f__Bacteroidaceae|g__Bacteroides|s__Bacteroides_thetaiotaomicron
C1	C4	87.3418	90.2299	79	174	69	157	1.79076	1.76174	0.023571	0.49297	0.499006	1	0.747134	0.513581	0.811261	1	k__Bacteria|p__Actinobacteria|c__Coriobacteriia|o__Coriobacteriales|f__Coriobacteriaceae|g__Collinsella|s__Collinsella_aerofaciens
C1	C4	84.8101	79.3103	79	174	67	138	0.06619	0.064375	0.0401127	0.195563	0.303122	1	1.45652	0.387212	0.702288	1	k__Bacteria|p__Proteobacteria|c__Betaproteobacteria|o__Burkholderiales|f__Sutterellaceae|g__Parasutterella|s__Parasutterella_excrementihominis
C1	C4	93.6709	98.8506	79	174	74	172	0.72253	0.69033	0.0657713	0.466388	0.484848	1	0.172093	0.032251	0.173875	1	k__Bacteria|p__Firmicutes|c__Clostridia|o__Clostridiales|f__Lachnospiraceae|g__Blautia|s__Blautia_obeum
C1	C4	93.6709	98.8506	79	174	74	172	2.7904	2.6438	0.0778589	0.114631	0.21868	1	0.172093	0.032251	0.173875	1	k__Bacteria|p__Firmicutes|c__Clostridia|o__Clostridiales|f__Lachnospiraceae|g__Fusicatenibacter|s__Fusicatenibacter_saccharivorans
C1	C4	100	100	79	174	79	174	6.84405	6.42009	0.0922557	0.123481	0.228532	1		1	1	1	k__Bacteria|p__Firmicutes|c__Clostridia|o__Clostridiales|f__Ruminococcaceae|g__Faecalibacterium|s__Faecalibacterium_prausnitzii
C1	C4	70.8861	89.0805	79	174	56	155	0.01463	0.01356	0.109573	0.0537902	0.130146	1	0.298457	0.000817905	0.0195353	0.405681	k__Bacteria|p__Firmicutes|c__Clostridia|o__Clostridiales|f__Peptostreptococcaceae|g__Romboutsia|s__Romboutsia_ilealis
C1	C4	49.3671	24.7126	79	174	39	43	0.00383	0.00354	0.113595	5.69916e-05	0.000856602	0.0282679	2.97035	0.000152823	0.00842227	0.0758004	k__Bacteria|p__Firmicutes|c__Negativicutes|o__Veillonellales|f__Veillonellaceae|g__Veillonella|s__Veillonella_infantium
C1	C4	86.0759	93.1034	79	174	68	162	0.902195	0.802175	0.169522	0.220477	0.322713	1	0.457912	0.0968449	0.343108	1	k__Bacteria|p__Firmicutes|c__Clostridia|o__Clostridiales|f__Lachnospiraceae|g__Blautia|s__Ruminococcus_torques
C1	C4	83.5443	89.0805	79	174	66	155	6.09801	5.41302	0.171905	0.432218	0.473111	1	0.622333	0.226434	0.539959	1	k__Bacteria|p__Bacteroidetes|c__Bacteroidia|o__Bacteroidales|f__Bacteroidaceae|g__Bacteroides|s__Bacteroides_vulgatus
C1	C4	93.6709	98.2759	79	174	74	171	1.01265	0.89026	0.18583	0.244621	0.344693	1	0.259649	0.11244	0.371801	1	k__Bacteria|p__Firmicutes|c__Clostridia|o__Clostridiales|f__Lachnospiraceae|g__Dorea|s__Dorea_longicatena
C1	C4	59.4937	62.6437	79	174	47	109	0.02286	0.02006	0.188504	0.415	0.463733	1	0.87586	0.676424	0.911702	1	k__Bacteria|p__Actinobacteria|c__Coriobacteriia|o__Eggerthellales|f__Eggerthellaceae|g__Eggerthella|s__Eggerthella_lenta
C1	C4	98.7342	98.2759	79	174	78	171	0.906875	0.79283	0.193892	0.164743	0.270053	1	1.36842	1	1	1	k__Bacteria|p__Firmicutes|c__Clostridia|o__Clostridiales|f__Eubacteriaceae|g__Eubacterium|s__Eubacterium_hallii
C1	C4	89.8734	91.954	79	174	71	160	0.01852	0.016155	0.197103	0.407621	0.461599	1	0.776563	0.63243	0.876216	1	k__Bacteria|p__Actinobacteria|c__Coriobacteriia|o__Coriobacteriales|f__Coriobacteriaceae|g__Collinsella|s__Collinsella_stercoris
C1	C4	49.3671	27.0115	79	174	39	47	0.00779	0.00667	0.223937	0.000349178	0.00298607	0.173192	2.63457	0.000905869	0.0195353	0.449311	k__Bacteria|p__Firmicutes|c__Negativicutes|o__Veillonellales|f__Veillonellaceae|g__Veillonella|s__Veillonella_atypica
C1	C4	53.1646	66.6667	79	174	42	116	0.96518	0.82409	0.227996	0.0260592	0.0839309	1	0.567568	0.0497158	0.230626	1	k__Bacteria|p__Firmicutes|c__Clostridia|o__Clostridiales|f__Lachnospiraceae|g__Coprococcus|s__Coprococcus_eutactus
C1	C4	51.8987	50	79	174	41	87	0.33957	0.28932	0.231043	0.403557	0.46094	1	1.07895	0.787916	0.960515	1	k__Bacteria|p__Bacteroidetes|c__Bacteroidia|o__Bacteroidales|f__Bacteroidaceae|g__Bacteroides|s__Bacteroides_fragilis
C1	C4	72.1519	64.3678	79	174	57	112	0.00701	0.005905	0.247477	0.124047	0.228726	1	1.43425	0.250873	0.565604	1	k__Bacteria|p__Firmicutes|c__Clostridia|o__Clostridiales|f__Lachnospiraceae|g__Lachnoclostridium|s__Clostridium_citroniae
C1	C4	51.8987	45.4023	79	174	41	79	0.00793	0.00661	0.262671	0.0600828	0.141237	1	1.29747	0.34549	0.661633	1	k__Bacteria|p__Firmicutes|c__Clostridia|o__Clostridiales|f__Lachnospiraceae|g__Lachnoclostridium|s__Clostridium_lavalense
C1	C4	56.962	75.2874	79	174	45	131	0.13854	0.11446	0.275459	0.0115223	0.047232	1	0.434441	0.00489046	0.0597119	1	k__Bacteria|p__Bacteroidetes|c__Bacteroidia|o__Bacteroidales|f__Barnesiellaceae|g__Coprobacter|s__Coprobacter_fastidiosus
C1	C4	78.481	85.0575	79	174	62	148	0.022545	0.018575	0.279445	0.398078	0.459296	1	0.6407	0.209362	0.519231	1	k__Bacteria|p__Firmicutes|c__Clostridia|o__Clostridiales|f__Lachnospiraceae|g__Roseburia|s__Roseburia_sp_CAG_471
C1	C4	26.5823	44.8276	79	174	21	78	0.04757	0.039185	0.279751	0.00663743	0.031354	1	0.445623	0.00802991	0.0812823	1	k__Bacteria|p__Firmicutes|c__Firmicutes_unclassified|o__Firmicutes_unclassified|f__Firmicutes_unclassified|g__Firmicutes_unclassified|s__Firmicutes_bacterium_CAG_170
C1	C4	77.2152	90.8046	79	174	61	158	0.84275	0.692495	0.283301	0.0532722	0.129525	1	0.343179	0.00503091	0.0597119	1	k__Bacteria|p__Firmicutes|c__Clostridia|o__Clostridiales|f__Oscillospiraceae|g__Oscillibacter|s__Oscillibacter_sp_57_20
C1	C4	53.1646	39.0805	79	174	42	68	0.02477	0.02027	0.289248	0.0145498	0.0559433	1	1.76948	0.0407078	0.206031	1	k__Bacteria|p__Firmicutes|c__Erysipelotrichia|o__Erysipelotrichales|f__Erysipelotrichaceae|g__Erysipelatoclostridium|s__Clostridium_spiroforme
C1	C4	91.1392	96.5517	79	174	72	168	0.28979	0.234575	0.304959	0.219449	0.322713	1	0.367347	0.119412	0.380266	1	k__Bacteria|p__Firmicutes|c__Clostridia|o__Clostridiales|f__Ruminococcaceae|g__Gemmiger|s__Gemmiger_formicilis
C1	C4	51.8987	52.8736	79	174	41	92	0.01022	0.008015	0.350621	0.478882	0.491442	1	0.96167	0.892837	1	1	k__Bacteria|p__Firmicutes|c__Clostridia|o__Clostridiales|f__Ruminococcaceae|g__Anaerotruncus|s__Anaerotruncus_colihominis
C1	C4	100	100	79	174	79	174	1.06091	0.819695	0.372143	0.0282776	0.0887701	1		1	1	1	k__Bacteria|p__Firmicutes|c__Clostridia|o__Clostridiales|f__Lachnospiraceae|g__Anaerostipes|s__Anaerostipes_hadrus
C1	C4	25.3165	21.2644	79	174	20	37	0.00435	0.00335	0.376854	0.259867	0.358066	1	1.25515	0.517118	0.813514	1	k__Bacteria|p__Firmicutes|c__Bacilli|o__Lactobacillales|f__Streptococcaceae|g__Streptococcus|s__Streptococcus_australis
C1	C4	73.4177	74.1379	79	174	58	129	0.10556	0.0812	0.378512	0.40611	0.46094	1	0.963455	1	1	1	k__Bacteria|p__Firmicutes|c__Bacilli|o__Lactobacillales|f__Streptococcaceae|g__Streptococcus|s__Streptococcus_thermophilus
C1	C4	97.4684	98.8506	79	174	77	172	0.30362	0.230115	0.399912	0.00220899	0.0132007	1	0.447674	0.591044	0.849733	1	k__Bacteria|p__Firmicutes|c__Clostridia|o__Clostridiales|f__Lachnospiraceae|g__Dorea|s__Dorea_formicigenerans
C1	C4	88.6076	92.5287	79	174	70	161	0.898625	0.67421	0.414521	0.143975	0.252337	1	0.628019	0.338466	0.658058	1	k__Bacteria|p__Firmicutes|c__Clostridia|o__Clostridiales|f__Lachnospiraceae|g__Coprococcus|s__Coprococcus_comes
C1	C4	30.3797	20.6897	79	174	24	36	0.0124	0.009125	0.442444	0.0480124	0.122124	1	1.67273	0.110888	0.36913	1	k__Bacteria|p__Firmicutes|c__Clostridia|o__Clostridiales|f__Lachnospiraceae|g__Lachnoclostridium|s__Clostridium_saccharolyticum
C1	C4	54.4304	58.046	79	174	43	101	0.01078	0.00791	0.446608	0.436275	0.473507	1	0.863311	0.681254	0.915723	1	k__Bacteria|p__Firmicutes|c__Clostridia|o__Clostridiales|f__Lachnospiraceae|g__Lachnoclostridium|s__Clostridium_bolteae
C1	C4	34.1772	36.7816	79	174	27	64	0.90988	0.665515	0.451205	0.471174	0.485946	1	0.892428	0.777693	0.960515	1	k__Bacteria|p__Bacteroidetes|c__Bacteroidia|o__Bacteroidales|f__Bacteroidaceae|g__Bacteroides|s__Bacteroides_massiliensis
C1	C4	50.6329	39.6552	79	174	40	69	0.011425	0.00831	0.459274	0.0321892	0.0949266	1	1.56076	0.131585	0.399928	1	k__Bacteria|p__Firmicutes|c__Negativicutes|o__Veillonellales|f__Veillonellaceae|g__Veillonella|s__Veillonella_dispar
C1	C4	34.1772	29.8851	79	174	27	52	0.31682	0.22818	0.473491	0.192749	0.299697	1	1.2182	0.558539	0.834444	1	k__Bacteria|p__Bacteroidetes|c__Bacteroidia|o__Bacteroidales|f__Prevotellaceae|g__Paraprevotella|s__Paraprevotella_xylaniphila
C1	C4	64.557	68.9655	79	174	51	120	1.15072	0.81145	0.503963	0.198777	0.304301	1	0.819643	0.562288	0.835015	1	k__Bacteria|p__Firmicutes|c__Clostridia|o__Clostridiales|f__Lachnospiraceae|g__Lachnospira|s__Lachnospira_pectinoschiza
C1	C4	89.8734	94.2529	79	174	71	164	0.1437	0.09674	0.570876	0.449097	0.474952	1	0.541159	0.289761	0.626068	1	k__Bacteria|p__Firmicutes|c__Clostridia|o__Clostridiales|f__Lachnospiraceae|g__Roseburia|s__Roseburia_hominis
C1	C4	58.2278	36.2069	79	174	46	63	0.0146	0.00945	0.627582	0.000347956	0.00298607	0.172586	2.45599	0.00154469	0.028471	0.766167	k__Bacteria|p__Firmicutes|c__Negativicutes|o__Veillonellales|f__Veillonellaceae|g__Veillonella|s__Veillonella_parvula
C1	C4	41.7722	34.4828	79	174	33	60	0.00571	0.00362	0.657501	0.0685862	0.155337	1	1.36304	0.324693	0.653559	1	k__Bacteria|p__Firmicutes|c__Clostridia|o__Clostridiales|f__Clostridiaceae|g__Clostridium|s__Clostridium_bolteae_CAG_59
C1	C4	29.1139	46.5517	79	174	23	81	0.11447	0.07253	0.65832	0.0134011	0.052338	1	0.471561	0.00917016	0.0851009	1	k__Bacteria|p__Firmicutes|c__Clostridia|o__Clostridiales|f__Ruminococcaceae|g__Ruminococcus|s__Ruminococcus_callidus
C1	C4	82.2785	90.8046	79	174	65	158	0.03987	0.02399	0.73287	0.355286	0.429252	1	0.470163	0.0604048	0.251771	1	k__Bacteria|p__Actinobacteria|c__Coriobacteriia|o__Eggerthellales|f__Eggerthellaceae|g__Gordonibacter|s__Gordonibacter_pamelaeae
C1	C4	60.7595	41.3793	79	174	48	72	0.015575	0.009245	0.752487	0.000313132	0.00287618	0.155314	2.19355	0.004522	0.059024	1	k__Bacteria|p__Proteobacteria|c__Gammaproteobacteria|o__Pasteurellales|f__Pasteurellaceae|g__Haemophilus|s__Haemophilus_parainfluenzae
C1	C4	46.8354	27.0115	79	174	37	47	0.00381	0.00225	0.759866	0.000228301	0.00241114	0.113237	2.38045	0.00246946	0.0382766	1	k__Bacteria|p__Actinobacteria|c__Actinobacteria|o__Actinomycetales|f__Actinomycetaceae|g__Actinomyces|s__Actinomyces_sp_ICM47
C1	C4	32.9114	27.5862	79	174	26	48	0.89785	0.5238	0.777458	0.163156	0.270053	1	1.28774	0.456051	0.76108	1	k__Bacteria|p__Actinobacteria|c__Actinobacteria|o__Bifidobacteriales|f__Bifidobacteriaceae|g__Bifidobacterium|s__Bifidobacterium_bifidum
C1	C4	35.443	30.4598	79	174	28	53	0.010575	0.00616	0.779655	0.132696	0.240209	1	1.25342	0.468388	0.766733	1	k__Bacteria|p__Proteobacteria|c__Betaproteobacteria|o__Burkholderiales|f__Sutterellaceae|g__Sutterella|s__Sutterella_parvirubra
C1	C4	62.0253	62.6437	79	174	49	109	0.06544	0.03811	0.780003	0.258897	0.358066	1	0.974006	1	1	1	k__Bacteria|p__Firmicutes|c__Bacilli|o__Lactobacillales|f__Lactobacillaceae|g__Lactobacillus|s__Lactobacillus_rogosae
C1	C4	100	97.7011	79	174	79	170	0.47881	0.26477	0.854714	0.000228475	0.00241114	0.113324	inf	0.31286	0.646607	1	k__Bacteria|p__Firmicutes|c__Clostridia|o__Clostridiales|f__Ruminococcaceae|g__Agathobaculum|s__Agathobaculum_butyriciproducens
C1	C4	49.3671	45.4023	79	174	39	79	0.03798	0.02004	0.922357	0.232156	0.332195	1	1.17247	0.588204	0.848108	1	k__Bacteria|p__Bacteroidetes|c__Bacteroidia|o__Bacteroidales|f__Bacteroidaceae|g__Bacteroides|s__Bacteroides_galacturonicus
C1	C4	86.0759	89.0805	79	174	68	155	0.143045	0.07517	0.92824	0.000258747	0.00256677	0.128339	0.757771	0.531248	0.820869	1	k__Bacteria|p__Firmicutes|c__Clostridia|o__Clostridiales|f__Eubacteriaceae|g__Eubacterium|s__Eubacterium_ramulus
C1	C4	79.7468	77.5862	79	174	63	135	0.21613	0.11103	0.96095	0.0735577	0.160725	1	1.1375	0.744832	0.960515	1	k__Bacteria|p__Bacteroidetes|c__Bacteroidia|o__Bacteroidales|f__Bacteroidaceae|g__Bacteroides|s__Bacteroides_xylanisolvens
C1	C4	39.2405	35.0575	79	174	31	61	0.00812	0.00413	0.975338	0.118311	0.223978	1	1.19638	0.573372	0.844276	1	k__Bacteria|p__Proteobacteria|c__Gammaproteobacteria|o__Pasteurellales|f__Pasteurellaceae|g__Haemophilus|s__Haemophilus_sp_HMSC71H05
C1	C4	67.0886	69.5402	79	174	53	121	0.02869	0.01386	1.04962	0.223435	0.322713	1	0.89288	0.769933	0.960515	1	k__Bacteria|p__Proteobacteria|c__Proteobacteria_unclassified|o__Proteobacteria_unclassified|f__Proteobacteria_unclassified|g__Proteobacteria_unclassified|s__Proteobacteria_bacterium_CAG_139
C1	C4	92.4051	93.6782	79	174	73	163	0.35276	0.16231	1.11994	0.00437325	0.0230758	1	0.821063	0.787482	0.960515	1	k__Bacteria|p__Firmicutes|c__Clostridia|o__Clostridiales|f__Lachnospiraceae|g__Roseburia|s__Roseburia_inulinivorans
C1	C4	56.962	55.7471	79	174	45	97	0.01525	0.00683	1.15885	0.146607	0.253499	1	1.05064	0.891859	1	1	k__Bacteria|p__Proteobacteria|c__Betaproteobacteria|o__Burkholderiales|f__Sutterellaceae|g__Turicimonas|s__Turicimonas_muris
C1	C4	100	99.4253	79	174	79	173	0.6114	0.2705	1.17649	1.67287e-07	6.38264e-06	8.29743e-05	inf	1	1	1	k__Bacteria|p__Firmicutes|c__Clostridia|o__Clostridiales|f__Lachnospiraceae|g__Blautia|s__Blautia_wexlerae
C1	C4	34.1772	22.4138	79	174	27	39	0.20946	0.08865	1.24048	0.0177745	0.0662868	1	1.79734	0.0632459	0.260597	1	k__Bacteria|p__Actinobacteria|c__Actinobacteria|o__Bifidobacteriales|f__Bifidobacteriaceae|g__Bifidobacterium|s__Bifidobacterium_pseudocatenulatum
C1	C4	35.443	37.931	79	174	28	66	0.072285	0.028805	1.32738	0.390522	0.454692	1	0.898396	0.779337	0.960515	1	k__Bacteria|p__Firmicutes|c__Clostridia|o__Clostridiales|f__Lachnospiraceae|g__Roseburia|s__Roseburia_sp_CAG_182
C1	C4	36.7089	31.6092	79	174	29	55	0.42198	0.16476	1.35681	0.0713312	0.160092	1	1.25491	0.472088	0.767777	1	k__Bacteria|p__Firmicutes|c__Clostridia|o__Clostridiales|f__Eubacteriaceae|g__Eubacterium|s__Eubacterium_sp_CAG_274
C1	C4	78.481	83.908	79	174	62	146	1.53154	0.571035	1.42334	0.0106525	0.0463476	1	0.699436	0.29356	0.630328	1	k__Bacteria|p__Firmicutes|c__Clostridia|o__Clostridiales|f__Lachnospiraceae|g__Roseburia|s__Roseburia_faecis
C1	C4	75.9494	79.3103	79	174	60	138	0.27653	0.081635	1.76018	0.0200539	0.0696078	1	0.823799	0.622039	0.866661	1	k__Bacteria|p__Firmicutes|c__Clostridia|o__Clostridiales|f__Eubacteriaceae|g__Eubacterium|s__Eubacterium_sp_CAG_38
C1	C4	93.6709	95.977	79	174	74	167	3.16449	0.93123	1.76476	2.96281e-05	0.000474049	0.0146955	0.620359	0.524281	0.814243	1	k__Bacteria|p__Firmicutes|c__Clostridia|o__Clostridiales|f__Lachnospiraceae|g__Lachnospiraceae_unclassified|s__Eubacterium_rectale
C1	C4	30.3797	31.0345	79	174	24	54	2.27392	0.631405	1.84854	0.449052	0.474952	1	0.969697	1	1	1	k__Bacteria|p__Bacteroidetes|c__Bacteroidia|o__Bacteroidales|f__Bacteroidaceae|g__Bacteroides|s__Bacteroides_eggerthii
C1	C4	73.4177	80.4598	79	174	58	140	0.607595	0.113915	2.41515	0.00467972	0.024433	1	0.670748	0.249588	0.565276	1	k__Bacteria|p__Firmicutes|c__Clostridia|o__Clostridiales|f__Lachnospiraceae|g__Roseburia|s__Roseburia_intestinalis
C1	C4	37.9747	33.3333	79	174	30	58	28.8999	1.30902	4.4645	0.0382002	0.105851	1	1.22449	0.479805	0.77519	1	k__Bacteria|p__Bacteroidetes|c__Bacteroidia|o__Bacteroidales|f__Prevotellaceae|g__Prevotella|s__Prevotella_copri

## Sheet: Transit tim species C2C3 vs. C1
Class 1	Class2	Class 1 prevalence (%)	Class 2 prevalence (%)	Class 1 total	Class 2 total	Class 1 positives	Class 2 positives	Class 1 median relative abundance	Class 2 median relative abundance	Effect size	pvalue MWU	pvalue MWU FDR	pvalue MWU Bonferroni	oddsratio Fisher	pvalue F	pvalue F FDR	pvalue F Bonferroni	Taxonomy
C2 C3	C1	24.918	30.3797	610	79	152	24	0.582295	2.27392	-1.96536	0.0733273	0.160725	1	0.760553	0.336834	0.658058	1	k__Bacteria|p__Bacteroidetes|c__Bacteroidia|o__Bacteroidales|f__Bacteroidaceae|g__Bacteroides|s__Bacteroides_eggerthii
C2 C3	C1	40.3279	29.1139	610	79	246	23	0.04267	0.11447	-1.42368	0.0806639	0.171714	1	1.64548	0.0655834	0.264732	1	k__Bacteria|p__Firmicutes|c__Clostridia|o__Clostridiales|f__Ruminococcaceae|g__Ruminococcus|s__Ruminococcus_callidus
C2 C3	C1	79.3443	75.9494	610	79	484	60	0.148845	0.27653	-0.893625	0.109564	0.214798	1	1.2164	0.466606	0.766346	1	k__Bacteria|p__Firmicutes|c__Clostridia|o__Clostridiales|f__Eubacteriaceae|g__Eubacterium|s__Eubacterium_sp_CAG_38
C2 C3	C1	33.6066	37.9747	610	79	205	30	15.6562	28.8999	-0.884327	0.148385	0.253499	1	0.826749	0.450974	0.755687	1	k__Bacteria|p__Bacteroidetes|c__Bacteroidia|o__Bacteroidales|f__Prevotellaceae|g__Prevotella|s__Prevotella_copri
C2 C3	C1	79.0164	73.4177	610	79	482	58	0.33165	0.607595	-0.873448	0.245431	0.344855	1	1.36342	0.248632	0.565276	1	k__Bacteria|p__Firmicutes|c__Clostridia|o__Clostridiales|f__Lachnospiraceae|g__Roseburia|s__Roseburia_intestinalis
C2 C3	C1	73.6066	73.4177	610	79	449	58	0.05766	0.10556	-0.872421	0.147789	0.253499	1	1.00975	1	1	1	k__Bacteria|p__Firmicutes|c__Bacilli|o__Lactobacillales|f__Streptococcaceae|g__Streptococcus|s__Streptococcus_thermophilus
C2 C3	C1	68.5246	67.0886	610	79	418	53	0.015695	0.02869	-0.870243	0.293345	0.382429	1	1.068	0.798008	0.960515	1	k__Bacteria|p__Proteobacteria|c__Proteobacteria_unclassified|o__Proteobacteria_unclassified|f__Proteobacteria_unclassified|g__Proteobacteria_unclassified|s__Proteobacteria_bacterium_CAG_139
C2 C3	C1	26.5574	25.3165	610	79	162	20	0.00248	0.00435	-0.810675	0.423382	0.4677	1	1.06674	0.892536	1	1	k__Bacteria|p__Firmicutes|c__Bacilli|o__Lactobacillales|f__Streptococcaceae|g__Streptococcus|s__Streptococcus_australis
C2 C3	C1	85.082	82.2785	610	79	519	65	0.0232	0.03987	-0.781179	0.10511	0.208537	1	1.2284	0.507132	0.808803	1	k__Bacteria|p__Actinobacteria|c__Coriobacteriia|o__Eggerthellales|f__Eggerthellaceae|g__Gordonibacter|s__Gordonibacter_pamelaeae
C2 C3	C1	54.4262	58.2278	610	79	332	46	0.008865	0.0146	-0.719776	0.107886	0.213194	1	0.856741	0.549849	0.831211	1	k__Bacteria|p__Firmicutes|c__Negativicutes|o__Veillonellales|f__Veillonellaceae|g__Veillonella|s__Veillonella_parvula
C2 C3	C1	34.5902	46.8354	610	79	211	37	0.00233	0.00381	-0.709461	0.00615489	0.0296391	1	0.600284	0.0349319	0.184321	1	k__Bacteria|p__Actinobacteria|c__Actinobacteria|o__Actinomycetales|f__Actinomycetaceae|g__Actinomyces|s__Actinomyces_sp_ICM47
C2 C3	C1	52.1311	51.8987	610	79	318	41	0.00635	0.01022	-0.686567	0.394814	0.457542	1	1.00936	1	1	1	k__Bacteria|p__Firmicutes|c__Clostridia|o__Clostridiales|f__Ruminococcaceae|g__Anaerotruncus|s__Anaerotruncus_colihominis
C2 C3	C1	49.6721	54.4304	610	79	303	43	0.0067	0.01078	-0.686124	0.0735195	0.160725	1	0.826301	0.473666	0.767777	1	k__Bacteria|p__Firmicutes|c__Clostridia|o__Clostridiales|f__Lachnospiraceae|g__Lachnoclostridium|s__Clostridium_bolteae
C2 C3	C1	26.0656	35.443	610	79	159	28	0.00098	0.00155	-0.661415	0.0182365	0.0670021	1	0.642144	0.0817211	0.30249	1	k__Bacteria|p__Actinobacteria|c__Actinobacteria|o__Actinomycetales|f__Actinomycetaceae|g__Actinomyces|s__Actinomyces_odontolyticus
C2 C3	C1	65.082	49.3671	610	79	397	39	0.04316	0.06766	-0.648608	0.043186	0.115785	1	1.91164	0.00885494	0.0851009	1	k__Bacteria|p__Bacteroidetes|c__Bacteroidia|o__Bacteroidales|f__Rikenellaceae|g__Alistipes|s__Alistipes_indistinctus
C2 C3	C1	49.0164	50.6329	610	79	299	40	0.03031	0.046455	-0.61604	0.203706	0.307106	1	0.937379	0.811812	0.960999	1	k__Bacteria|p__Firmicutes|c__Clostridia|o__Clostridiales|f__Clostridiaceae|g__Clostridium|s__Clostridium_disporicum
C2 C3	C1	32.623	36.7089	610	79	199	29	0.27713	0.42198	-0.606612	0.149237	0.253499	1	0.834802	0.525318	0.814243	1	k__Bacteria|p__Firmicutes|c__Clostridia|o__Clostridiales|f__Eubacteriaceae|g__Eubacterium|s__Eubacterium_sp_CAG_274
C2 C3	C1	95.082	93.6709	610	79	580	74	2.10259	3.16449	-0.589802	0.0900183	0.185266	1	1.30631	0.584214	0.847281	1	k__Bacteria|p__Firmicutes|c__Clostridia|o__Clostridiales|f__Lachnospiraceae|g__Lachnospiraceae_unclassified|s__Eubacterium_rectale
C2 C3	C1	46.3934	51.8987	610	79	283	41	0.0053	0.00793	-0.581329	0.0483647	0.122392	1	0.802118	0.402107	0.720018	1	k__Bacteria|p__Firmicutes|c__Clostridia|o__Clostridiales|f__Lachnospiraceae|g__Lachnoclostridium|s__Clostridium_lavalense
C2 C3	C1	55.9016	56.962	610	79	341	45	0.01022	0.01525	-0.577414	0.224964	0.323427	1	0.957786	0.904458	1	1	k__Bacteria|p__Proteobacteria|c__Betaproteobacteria|o__Burkholderiales|f__Sutterellaceae|g__Turicimonas|s__Turicimonas_muris
C2 C3	C1	45.7377	58.2278	610	79	279	46	0.03339	0.04969	-0.573539	0.011388	0.0470704	1	0.604689	0.0416485	0.208663	1	k__Bacteria|p__Firmicutes|c__Clostridia|o__Clostridiales|f__Lachnospiraceae|g__Blautia|s__Ruminococcus_gnavus
C2 C3	C1	87.8689	77.2152	610	79	536	61	0.56845	0.84275	-0.568071	0.459877	0.481221	1	2.13735	0.0132431	0.107681	1	k__Bacteria|p__Firmicutes|c__Clostridia|o__Clostridiales|f__Oscillospiraceae|g__Oscillibacter|s__Oscillibacter_sp_57_20
C2 C3	C1	35.5738	39.2405	610	79	217	31	0.00439	0.00642	-0.548352	0.182728	0.289563	1	0.854962	0.535006	0.82399	1	k__Bacteria|p__Firmicutes|c__Clostridia|o__Clostridiales|f__Lachnospiraceae|g__Lachnoclostridium|s__Clostridium_asparagiforme
C2 C3	C1	20.1639	21.519	610	79	123	17	0.00241	0.00341	-0.500739	0.312021	0.396456	1	0.921126	0.767292	0.960515	1	k__Bacteria|p__Firmicutes|c__Bacilli|o__Bacillales|f__Bacillales_unclassified|g__Gemella|s__Gemella_sanguinis
C2 C3	C1	31.4754	21.519	610	79	192	17	0.026715	0.03751	-0.489625	0.0463828	0.12039	1	1.6752	0.0901087	0.326233	1	k__Bacteria|p__Lentisphaerae|c__Lentisphaeria|o__Victivallales|f__Victivallaceae|g__Victivallis|s__Victivallis_vadensis
C2 C3	C1	61.6393	55.6962	610	79	376	44	0.037285	0.051685	-0.47115	0.414782	0.463733	1	1.27817	0.328005	0.653559	1	k__Bacteria|p__Proteobacteria|c__Gammaproteobacteria|o__Enterobacterales|f__Enterobacteriaceae|g__Escherichia|s__Escherichia_coli
C2 C3	C1	36.2295	39.2405	610	79	221	31	0.00589	0.00812	-0.463212	0.172619	0.277983	1	0.879675	0.620636	0.866661	1	k__Bacteria|p__Proteobacteria|c__Gammaproteobacteria|o__Pasteurellales|f__Pasteurellaceae|g__Haemophilus|s__Haemophilus_sp_HMSC71H05
C2 C3	C1	79.1803	79.7468	610	79	483	63	0.15769	0.21613	-0.454808	0.351798	0.429252	1	0.965879	1	1	1	k__Bacteria|p__Bacteroidetes|c__Bacteroidia|o__Bacteroidales|f__Bacteroidaceae|g__Bacteroides|s__Bacteroides_xylanisolvens
C2 C3	C1	26.5574	32.9114	610	79	162	26	0.66771	0.89785	-0.427253	0.100295	0.202859	1	0.737122	0.230039	0.540589	1	k__Bacteria|p__Actinobacteria|c__Actinobacteria|o__Bifidobacteriales|f__Bifidobacteriaceae|g__Bifidobacterium|s__Bifidobacterium_bifidum
C2 C3	C1	25.4098	41.7722	610	79	155	33	0.00435	0.00571	-0.392475	0.000434757	0.00365491	0.21564	0.474858	0.00304077	0.043092	1	k__Bacteria|p__Firmicutes|c__Clostridia|o__Clostridiales|f__Clostridiaceae|g__Clostridium|s__Clostridium_bolteae_CAG_59
C2 C3	C1	37.377	35.443	610	79	228	28	0.05509	0.072285	-0.391906	0.468109	0.484848	1	1.08714	0.80503	0.960515	1	k__Bacteria|p__Firmicutes|c__Clostridia|o__Clostridiales|f__Lachnospiraceae|g__Roseburia|s__Roseburia_sp_CAG_182
C2 C3	C1	54.918	60.7595	610	79	335	48	0.01202	0.015575	-0.373795	0.0822301	0.1743	1	0.786742	0.338514	0.658058	1	k__Bacteria|p__Proteobacteria|c__Gammaproteobacteria|o__Pasteurellales|f__Pasteurellaceae|g__Haemophilus|s__Haemophilus_parainfluenzae
C2 C3	C1	65.082	56.962	610	79	397	45	0.10695	0.13854	-0.373366	0.0937848	0.191429	1	1.40824	0.170836	0.448332	1	k__Bacteria|p__Bacteroidetes|c__Bacteroidia|o__Bacteroidales|f__Barnesiellaceae|g__Coprobacter|s__Coprobacter_fastidiosus
C2 C3	C1	69.3443	62.0253	610	79	423	49	0.05057	0.06544	-0.371891	0.164923	0.270053	1	1.38492	0.199018	0.498551	1	k__Bacteria|p__Firmicutes|c__Bacilli|o__Lactobacillales|f__Lactobacillaceae|g__Lactobacillus|s__Lactobacillus_rogosae
C2 C3	C1	36.3934	34.1772	610	79	222	27	0.709535	0.90988	-0.358802	0.44762	0.474952	1	1.10195	0.803572	0.960515	1	k__Bacteria|p__Bacteroidetes|c__Bacteroidia|o__Bacteroidales|f__Bacteroidaceae|g__Bacteroides|s__Bacteroides_massiliensis
C2 C3	C1	61.4754	59.4937	610	79	375	47	0.01806	0.02286	-0.340028	0.497901	0.499472	1	1.08646	0.806251	0.960515	1	k__Bacteria|p__Actinobacteria|c__Coriobacteriia|o__Eggerthellales|f__Eggerthellaceae|g__Eggerthella|s__Eggerthella_lenta
C2 C3	C1	47.8689	51.8987	610	79	292	41	0.270315	0.33957	-0.329067	0.239622	0.339579	1	0.851051	0.550256	0.831211	1	k__Bacteria|p__Bacteroidetes|c__Bacteroidia|o__Bacteroidales|f__Bacteroidaceae|g__Bacteroides|s__Bacteroides_fragilis
C2 C3	C1	44.918	50.6329	610	79	274	40	0.009105	0.011425	-0.327463	0.112722	0.216705	1	0.795089	0.340088	0.658058	1	k__Bacteria|p__Firmicutes|c__Negativicutes|o__Veillonellales|f__Veillonellaceae|g__Veillonella|s__Veillonella_dispar
C2 C3	C1	71.4754	77.2152	610	79	436	61	1.43751	1.79412	-0.319704	0.102971	0.205115	1	0.739401	0.350478	0.666043	1	k__Bacteria|p__Actinobacteria|c__Actinobacteria|o__Bifidobacteriales|f__Bifidobacteriaceae|g__Bifidobacterium|s__Bifidobacterium_adolescentis
C2 C3	C1	26.7213	30.3797	610	79	163	24	0.01003	0.0124	-0.306019	0.270844	0.363078	1	0.835664	0.502626	0.806803	1	k__Bacteria|p__Firmicutes|c__Clostridia|o__Clostridiales|f__Lachnospiraceae|g__Lachnoclostridium|s__Clostridium_saccharolyticum
C2 C3	C1	40	39.2405	610	79	244	31	0.027695	0.03416	-0.302682	0.39429	0.457542	1	1.03226	1	1	1	k__Bacteria|p__Bacteroidetes|c__Bacteroidia|o__Bacteroidales|f__Rikenellaceae|g__Alistipes|s__Alistipes_onderdonkii
C2 C3	C1	59.8361	72.1519	610	79	365	57	0.00131	0.0016	-0.288505	0.0056587	0.02864	1	0.575009	0.0370541	0.193461	1	k__Bacteria|p__Actinobacteria|c__Coriobacteriia|o__Coriobacteriales|f__Coriobacteriaceae|g__Enorma|s__[Collinsella]_massiliensis
C2 C3	C1	42.459	29.1139	610	79	259	23	0.01317	0.01602	-0.282619	0.0108832	0.0469398	1	1.79661	0.0281542	0.16705	1	k__Bacteria|p__Firmicutes|c__Clostridia|o__Clostridiales|f__Ruminococcaceae|g__Ruminococcaceae_unclassified|s__Ruminococcaceae_bacterium_D5
C2 C3	C1	71.9672	51.8987	610	79	439	41	0.01169	0.01416	-0.276546	0.00282736	0.0161192	1	2.3794	0.000415003	0.014703	0.205841	k__Bacteria|p__Firmicutes|c__Clostridia|o__Clostridiales|f__Ruminococcaceae|g__Anaeromassilibacillus|s__Anaeromassilibacillus_sp_An250
C2 C3	C1	81.4754	70.8861	610	79	497	56	0.01228	0.01463	-0.252619	0.284579	0.374406	1	1.80642	0.0345817	0.184321	1	k__Bacteria|p__Firmicutes|c__Clostridia|o__Clostridiales|f__Peptostreptococcaceae|g__Romboutsia|s__Romboutsia_ilealis
C2 C3	C1	61.3115	53.1646	610	79	374	42	0.8227	0.96518	-0.230432	0.0786695	0.168918	1	1.39609	0.179341	0.465723	1	k__Bacteria|p__Firmicutes|c__Clostridia|o__Clostridiales|f__Lachnospiraceae|g__Coprococcus|s__Coprococcus_eutactus
C2 C3	C1	87.377	83.5443	610	79	533	66	5.24019	6.09801	-0.218719	0.427584	0.470248	1	1.36344	0.373693	0.691913	1	k__Bacteria|p__Bacteroidetes|c__Bacteroidia|o__Bacteroidales|f__Bacteroidaceae|g__Bacteroides|s__Bacteroides_vulgatus
C2 C3	C1	87.541	89.8734	610	79	534	71	0.01595	0.01852	-0.215528	0.208644	0.312651	1	0.791698	0.714516	0.942553	1	k__Bacteria|p__Actinobacteria|c__Coriobacteriia|o__Coriobacteriales|f__Coriobacteriaceae|g__Collinsella|s__Collinsella_stercoris
C2 C3	C1	86.5574	87.3418	610	79	528	69	1.5487	1.79076	-0.209514	0.0663752	0.152417	1	0.933192	1	1	1	k__Bacteria|p__Actinobacteria|c__Coriobacteriia|o__Coriobacteriales|f__Coriobacteriaceae|g__Collinsella|s__Collinsella_aerofaciens
C2 C3	C1	28.1967	31.6456	610	79	172	25	0.00898	0.01014	-0.17527	0.19993	0.305124	1	0.848219	0.511126	0.810821	1	k__Bacteria|p__Firmicutes|c__Clostridia|o__Clostridiales|f__Lachnospiraceae|g__Lachnoclostridium|s__Clostridium_symbiosum
C2 C3	C1	95.9016	89.8734	610	79	585	71	0.1287	0.1437	-0.159048	0.158658	0.265859	1	2.63662	0.0427231	0.211907	1	k__Bacteria|p__Firmicutes|c__Clostridia|o__Clostridiales|f__Lachnospiraceae|g__Roseburia|s__Roseburia_hominis
C2 C3	C1	96.2295	91.1392	610	79	587	72	0.26016	0.28979	-0.155609	0.458969	0.481221	1	2.48128	0.0692926	0.270108	1	k__Bacteria|p__Firmicutes|c__Clostridia|o__Clostridiales|f__Ruminococcaceae|g__Gemmiger|s__Gemmiger_formicilis
C2 C3	C1	98.8525	93.6709	610	79	603	74	0.65089	0.72253	-0.150644	0.402956	0.46094	1	5.82046	0.00725033	0.0781775	1	k__Bacteria|p__Firmicutes|c__Clostridia|o__Clostridiales|f__Lachnospiraceae|g__Blautia|s__Blautia_obeum
C2 C3	C1	81.9672	84.8101	610	79	500	67	0.01356	0.01504	-0.149447	0.190375	0.296937	1	0.814111	0.639059	0.878042	1	k__Bacteria|p__Firmicutes|c__Bacilli|o__Lactobacillales|f__Streptococcaceae|g__Streptococcus|s__Streptococcus_parasanguinis
C2 C3	C1	99.8361	100	610	79	609	79	0.55378	0.6114	-0.142804	0.14172	0.251047	1	0	1	1	1	k__Bacteria|p__Firmicutes|c__Clostridia|o__Clostridiales|f__Lachnospiraceae|g__Blautia|s__Blautia_wexlerae
C2 C3	C1	86.3934	87.3418	610	79	527	69	0.42226	0.46196	-0.129636	0.381462	0.445189	1	0.920203	1	1	1	k__Bacteria|p__Bacteroidetes|c__Bacteroidia|o__Bacteroidales|f__Bacteroidaceae|g__Bacteroides|s__Bacteroides_thetaiotaomicron
C2 C3	C1	79.6721	78.481	610	79	486	62	1.39994	1.53154	-0.129618	0.221679	0.322713	1	1.07466	0.768771	0.960515	1	k__Bacteria|p__Firmicutes|c__Clostridia|o__Clostridiales|f__Lachnospiraceae|g__Roseburia|s__Roseburia_faecis
C2 C3	C1	37.541	34.1772	610	79	229	27	0.43149	0.47195	-0.129307	0.265662	0.3596	1	1.15758	0.62144	0.866661	1	k__Bacteria|p__Firmicutes|c__Negativicutes|o__Veillonellales|f__Veillonellaceae|g__Dialister|s__Dialister_invisus
C2 C3	C1	24.0984	30.3797	610	79	147	24	0.00213	0.002325	-0.126377	0.0989917	0.201229	1	0.727592	0.26753	0.589756	1	k__Bacteria|p__Firmicutes|c__Negativicutes|o__Veillonellales|f__Veillonellaceae|g__Veillonella|s__Veillonella_rogosae
C2 C3	C1	88.3607	79.7468	610	79	539	63	0.07679	0.08343	-0.119648	0.126174	0.230931	1	1.92801	0.0454158	0.220845	1	k__Bacteria|p__Firmicutes|c__Firmicutes_unclassified|o__Firmicutes_unclassified|f__Firmicutes_unclassified|g__Firmicutes_unclassified|s__Firmicutes_bacterium_CAG_83
C2 C3	C1	94.0984	93.6709	610	79	574	74	0.045655	0.049445	-0.115052	0.262404	0.358546	1	1.07733	0.802253	0.960515	1	k__Bacteria|p__Firmicutes|c__Clostridia|o__Clostridiales|f__Ruminococcaceae|g__Flavonifractor|s__Flavonifractor_plautii
C2 C3	C1	98.3607	100	610	79	600	79	0.44339	0.47881	-0.110877	0.405865	0.46094	1	0	0.614389	0.863278	1	k__Bacteria|p__Firmicutes|c__Clostridia|o__Clostridiales|f__Ruminococcaceae|g__Agathobaculum|s__Agathobaculum_butyriciproducens
C2 C3	C1	95.5738	93.6709	610	79	583	74	0.94171	1.01265	-0.104774	0.483467	0.492817	1	1.45896	0.399287	0.717559	1	k__Bacteria|p__Firmicutes|c__Clostridia|o__Clostridiales|f__Lachnospiraceae|g__Dorea|s__Dorea_longicatena
C2 C3	C1	21.1475	22.7848	610	79	129	18	0.00352	0.003785	-0.104718	0.378018	0.444306	1	0.90887	0.770478	0.960515	1	k__Bacteria|p__Actinobacteria|c__Coriobacteriia|o__Coriobacteriales|f__Atopobiaceae|g__Olsenella|s__Olsenella_scatoligenes
C2 C3	C1	35.9016	32.9114	610	79	219	26	0.00256	0.00275	-0.103288	0.332849	0.413768	1	1.14175	0.708038	0.936499	1	k__Bacteria|p__Actinobacteria|c__Actinobacteria|o__Micrococcales|f__Micrococcaceae|g__Rothia|s__Rothia_mucilaginosa
C2 C3	C1	29.0164	34.1772	610	79	177	27	0.19558	0.20946	-0.0989159	0.20252	0.30625	1	0.787272	0.360318	0.675232	1	k__Bacteria|p__Actinobacteria|c__Actinobacteria|o__Bifidobacteriales|f__Bifidobacteriaceae|g__Bifidobacterium|s__Bifidobacterium_pseudocatenulatum
C2 C3	C1	91.9672	88.6076	610	79	561	70	0.84142	0.898625	-0.0948931	0.164558	0.270053	1	1.47201	0.286843	0.624009	1	k__Bacteria|p__Firmicutes|c__Clostridia|o__Clostridiales|f__Lachnospiraceae|g__Coprococcus|s__Coprococcus_comes
C2 C3	C1	99.6721	100	610	79	608	79	0.99397	1.06091	-0.0940281	0.259887	0.358066	1	0	1	1	1	k__Bacteria|p__Firmicutes|c__Clostridia|o__Clostridiales|f__Lachnospiraceae|g__Anaerostipes|s__Anaerostipes_hadrus
C2 C3	C1	86.7213	79.7468	610	79	529	63	0.1543	0.1634	-0.0826699	0.119899	0.225266	1	1.65863	0.1196	0.380266	1	k__Bacteria|p__Firmicutes|c__Clostridia|o__Clostridiales|f__Oscillospiraceae|g__Oscillibacter|s__Oscillibacter_sp_CAG_241
C2 C3	C1	97.541	97.4684	610	79	595	77	0.28707	0.30362	-0.0808643	0.356901	0.429252	1	1.0303	1	1	1	k__Bacteria|p__Firmicutes|c__Clostridia|o__Clostridiales|f__Lachnospiraceae|g__Dorea|s__Dorea_formicigenerans
C2 C3	C1	66.3934	56.962	610	79	405	45	0.08148	0.08601	-0.0780584	0.0579806	0.136945	1	1.49268	0.103494	0.35219	1	k__Bacteria|p__Firmicutes|c__Clostridia|o__Clostridiales|f__Clostridiaceae|g__Clostridium|s__Clostridium_sp_CAG_58
C2 C3	C1	29.0164	29.1139	610	79	177	23	0.00825	0.00864	-0.0666372	0.442199	0.473717	1	0.995281	1	1	1	k__Bacteria|p__Firmicutes|c__Bacilli|o__Lactobacillales|f__Streptococcaceae|g__Lactococcus|s__Lactococcus_lactis
C2 C3	C1	46.0656	49.3671	610	79	281	39	0.00114	0.00119	-0.0619277	0.28765	0.377446	1	0.876003	0.632066	0.876216	1	k__Bacteria|p__Actinobacteria|c__Coriobacteriia|o__Coriobacteriales|f__Coriobacteriaceae|g__Enorma|s__Enorma_massiliensis
C2 C3	C1	24.0984	29.1139	610	79	147	23	0.87431	0.9117	-0.0604143	0.16333	0.270053	1	0.77303	0.33352	0.658058	1	k__Bacteria|p__Firmicutes|c__Clostridia|o__Clostridiales|f__Eubacteriaceae|g__Eubacterium|s__Eubacterium_sp_CAG_180
C2 C3	C1	90.4918	86.0759	610	79	552	68	0.87043	0.902195	-0.051711	0.374349	0.442434	1	1.53955	0.231058	0.540589	1	k__Bacteria|p__Firmicutes|c__Clostridia|o__Clostridiales|f__Lachnospiraceae|g__Blautia|s__Ruminococcus_torques
C2 C3	C1	76.3934	77.2152	610	79	466	61	0.053395	0.05491	-0.0403643	0.211594	0.314223	1	0.954918	1	1	1	k__Bacteria|p__Firmicutes|c__Clostridia|o__Clostridiales|f__Peptostreptococcaceae|g__Intestinibacter|s__Intestinibacter_bartlettii
C2 C3	C1	33.6066	35.443	610	79	205	28	0.01038	0.010575	-0.0268512	0.357156	0.429252	1	0.921958	0.800616	0.960515	1	k__Bacteria|p__Proteobacteria|c__Betaproteobacteria|o__Burkholderiales|f__Sutterellaceae|g__Sutterella|s__Sutterella_parvirubra
C2 C3	C1	95.5738	92.4051	610	79	583	73	0.34661	0.35276	-0.0253737	0.458253	0.481221	1	1.77473	0.255141	0.569724	1	k__Bacteria|p__Firmicutes|c__Clostridia|o__Clostridiales|f__Lachnospiraceae|g__Roseburia|s__Roseburia_inulinivorans
C2 C3	C1	94.0984	97.4684	610	79	574	77	0.049645	0.05017	-0.0151765	0.265945	0.3596	1	0.414141	0.29781	0.636696	1	k__Bacteria|p__Firmicutes|c__Bacilli|o__Lactobacillales|f__Streptococcaceae|g__Streptococcus|s__Streptococcus_salivarius
C2 C3	C1	93.9344	87.3418	610	79	573	69	0.63746	0.62905	0.0191601	0.0467775	0.12039	1	2.24442	0.0526226	0.238459	1	k__Bacteria|p__Bacteroidetes|c__Bacteroidia|o__Bacteroidales|f__Odoribacteraceae|g__Odoribacter|s__Odoribacter_splanchnicus
C2 C3	C1	87.0492	86.0759	610	79	531	68	0.14604	0.143045	0.0298945	0.415116	0.463733	1	1.0873	0.858921	0.986169	1	k__Bacteria|p__Firmicutes|c__Clostridia|o__Clostridiales|f__Eubacteriaceae|g__Eubacterium|s__Eubacterium_ramulus
C2 C3	C1	37.7049	49.3671	610	79	230	39	0.003915	0.00383	0.0316679	0.0232898	0.0775283	1	0.620783	0.0502169	0.230626	1	k__Bacteria|p__Firmicutes|c__Negativicutes|o__Veillonellales|f__Veillonellaceae|g__Veillonella|s__Veillonella_infantium
C2 C3	C1	28.6885	26.5823	610	79	175	21	0.04873	0.04757	0.0347582	0.342643	0.423763	1	1.11111	0.791294	0.960515	1	k__Bacteria|p__Firmicutes|c__Firmicutes_unclassified|o__Firmicutes_unclassified|f__Firmicutes_unclassified|g__Firmicutes_unclassified|s__Firmicutes_bacterium_CAG_170
C2 C3	C1	60.6557	64.557	610	79	370	51	0.56045	0.54208	0.0480799	0.315536	0.398233	1	0.846405	0.541381	0.82399	1	k__Bacteria|p__Firmicutes|c__Clostridia|o__Clostridiales|f__Ruminococcaceae|g__Ruminococcus|s__Ruminococcus_lactaris
C2 C3	C1	83.2787	79.7468	610	79	508	63	1.20433	1.15905	0.055288	0.375817	0.442768	1	1.26486	0.429103	0.736454	1	k__Bacteria|p__Bacteroidetes|c__Bacteroidia|o__Bacteroidales|f__Barnesiellaceae|g__Barnesiella|s__Barnesiella_intestinihominis
C2 C3	C1	51.6393	45.5696	610	79	315	36	0.00228	0.002185	0.0614005	0.0870707	0.180699	1	1.27542	0.339594	0.658058	1	k__Bacteria|p__Firmicutes|c__Clostridia|o__Clostridiales|f__Ruminococcaceae|g__Ruminococcaceae_unclassified|s__Ruminococcaceae_bacterium_D16
C2 C3	C1	91.9672	91.1392	610	79	561	72	0.47615	0.44724	0.0903669	0.133205	0.240253	1	1.1131	0.826172	0.971043	1	k__Bacteria|p__Firmicutes|c__Clostridia|o__Clostridiales|f__Lachnospiraceae|g__Coprococcus|s__Coprococcus_catus
C2 C3	C1	37.7049	49.3671	610	79	230	39	0.0083	0.00779	0.091488	0.0248756	0.0822552	1	0.620783	0.0502169	0.230626	1	k__Bacteria|p__Firmicutes|c__Negativicutes|o__Veillonellales|f__Veillonellaceae|g__Veillonella|s__Veillonella_atypica
C2 C3	C1	84.4262	78.481	610	79	515	62	0.02418	0.022545	0.101007	0.0666939	0.152443	1	1.48642	0.194311	0.494247	1	k__Bacteria|p__Firmicutes|c__Clostridia|o__Clostridiales|f__Lachnospiraceae|g__Roseburia|s__Roseburia_sp_CAG_471
C2 C3	C1	91.4754	84.8101	610	79	558	67	1.03957	0.95498	0.122438	0.0870541	0.180699	1	1.92193	0.0635729	0.260597	1	k__Bacteria|p__Bacteroidetes|c__Bacteroidia|o__Bacteroidales|f__Tannerellaceae|g__Parabacteroides|s__Parabacteroides_distasonis
C2 C3	C1	74.0984	65.8228	610	79	452	52	0.898355	0.82472	0.123381	0.0623044	0.145084	1	1.48539	0.137338	0.401527	1	k__Bacteria|p__Bacteroidetes|c__Bacteroidia|o__Bacteroidales|f__Bacteroidaceae|g__Bacteroides|s__Bacteroides_caccae
C2 C3	C1	35.5738	30.3797	610	79	217	24	0.03073	0.028125	0.127795	0.16252	0.270053	1	1.26537	0.383216	0.701384	1	k__Bacteria|p__Firmicutes|c__Clostridia|o__Clostridiales|f__Lachnospiraceae|g__Roseburia|s__Roseburia_sp_CAG_309
C2 C3	C1	99.0164	98.7342	610	79	604	78	0.99328	0.906875	0.131297	0.123079	0.228532	1	1.2906	0.575333	0.844276	1	k__Bacteria|p__Firmicutes|c__Clostridia|o__Clostridiales|f__Eubacteriaceae|g__Eubacterium|s__Eubacterium_hallii
C2 C3	C1	85.082	83.5443	610	79	519	66	0.69627	0.63337	0.136598	0.405823	0.46094	1	1.12338	0.738356	0.960515	1	k__Bacteria|p__Actinobacteria|c__Actinobacteria|o__Bifidobacteriales|f__Bifidobacteriaceae|g__Bifidobacterium|s__Bifidobacterium_longum
C2 C3	C1	68.6885	55.6962	610	79	419	44	0.00165	0.001495	0.142321	0.0187413	0.0678519	1	1.745	0.0297333	0.169514	1	k__Bacteria|p__Actinobacteria|c__Coriobacteriia|o__Eggerthellales|f__Eggerthellaceae|g__Enterorhabdus|s__Enterorhabdus_caecimuris
C2 C3	C1	39.1803	34.1772	610	79	239	27	0.00821	0.00741	0.147909	0.202354	0.30625	1	1.24069	0.461413	0.76287	1	k__Bacteria|p__Firmicutes|c__Firmicutes_unclassified|o__Firmicutes_unclassified|f__Firmicutes_unclassified|g__Firmicutes_unclassified|s__Firmicutes_bacterium_CAG_145
C2 C3	C1	43.4426	41.7722	610	79	265	33	0.0297	0.02678	0.149307	0.298185	0.386895	1	1.07071	0.810213	0.960999	1	k__Bacteria|p__Firmicutes|c__Firmicutes_unclassified|o__Firmicutes_unclassified|f__Firmicutes_unclassified|g__Firmicutes_unclassified|s__Firmicutes_bacterium_CAG_94
C2 C3	C1	73.7705	69.6203	610	79	450	55	0.098415	0.08866	0.150595	0.182501	0.289563	1	1.22727	0.420753	0.732258	1	k__Bacteria|p__Firmicutes|c__Clostridia|o__Clostridiales|f__Eubacteriaceae|g__Eubacterium|s__Eubacterium_ventriosum
C2 C3	C1	99.8361	100	610	79	609	79	7.60472	6.84405	0.152045	0.189325	0.296231	1	0	1	1	1	k__Bacteria|p__Firmicutes|c__Clostridia|o__Clostridiales|f__Ruminococcaceae|g__Faecalibacterium|s__Faecalibacterium_prausnitzii
C2 C3	C1	91.8033	91.1392	610	79	560	72	0.540615	0.48373	0.1604	0.313328	0.396456	1	1.08889	0.828127	0.971043	1	k__Bacteria|p__Bacteroidetes|c__Bacteroidia|o__Bacteroidales|f__Bacteroidaceae|g__Bacteroides|s__Bacteroides_ovatus
C2 C3	C1	34.4262	36.7089	610	79	210	29	0.011455	0.01024	0.161762	0.298752	0.386895	1	0.905172	0.707179	0.936499	1	k__Bacteria|p__Firmicutes|c__Clostridia|o__Clostridiales|f__Lachnospiraceae|g__Blautia|s__Blautia_hydrogenotrophica
C2 C3	C1	47.0492	44.3038	610	79	287	35	0.02676	0.02386	0.165484	0.282175	0.372231	1	1.11703	0.719511	0.946042	1	k__Bacteria|p__Bacteroidetes|c__Bacteroidia|o__Bacteroidales|f__Barnesiellaceae|g__Coprobacter|s__Coprobacter_secundus
C2 C3	C1	52.623	37.9747	610	79	321	30	0.00364	0.003185	0.192645	0.00399157	0.0217563	1	1.81419	0.0165455	0.124259	1	k__Bacteria|p__Firmicutes|c__Clostridia|o__Clostridiales|f__Oscillospiraceae|g__Oscillibacter|s__Oscillibacter_sp_PC13
C2 C3	C1	74.7541	64.557	610	79	456	51	1.31618	1.15072	0.19382	0.186942	0.293429	1	1.62567	0.0581789	0.247743	1	k__Bacteria|p__Firmicutes|c__Clostridia|o__Clostridiales|f__Lachnospiraceae|g__Lachnospira|s__Lachnospira_pectinoschiza
C2 C3	C1	90.1639	79.7468	610	79	550	63	0.075425	0.0658	0.196955	0.0402468	0.11029	1	2.32804	0.0114639	0.0997561	1	k__Bacteria|p__Proteobacteria|c__Deltaproteobacteria|o__Desulfovibrionales|f__Desulfovibrionaceae|g__Bilophila|s__Bilophila_wadsworthia
C2 C3	C1	78.5246	84.8101	610	79	479	67	0.07607	0.06619	0.200714	0.197424	0.303463	1	0.654893	0.238265	0.552241	1	k__Bacteria|p__Proteobacteria|c__Betaproteobacteria|o__Burkholderiales|f__Sutterellaceae|g__Parasutterella|s__Parasutterella_excrementihominis
C2 C3	C1	45.4098	53.1646	610	79	277	42	0.02849	0.02477	0.201862	0.147207	0.253499	1	0.732804	0.230401	0.540589	1	k__Bacteria|p__Firmicutes|c__Erysipelotrichia|o__Erysipelotrichales|f__Erysipelotrichaceae|g__Erysipelatoclostridium|s__Clostridium_spiroforme
C2 C3	C1	99.5082	96.2025	610	79	607	76	0.06762	0.05879	0.201879	0.0711865	0.160092	1	7.98684	0.0224928	0.150762	1	k__Bacteria|p__Firmicutes|c__Clostridia|o__Clostridiales|f__Ruminococcaceae|g__Ruthenibacterium|s__Ruthenibacterium_lactatiformans
C2 C3	C1	71.3115	72.1519	610	79	435	57	0.49518	0.42277	0.22808	0.399945	0.460262	1	0.959398	1	1	1	k__Bacteria|p__Verrucomicrobia|c__Verrucomicrobiae|o__Verrucomicrobiales|f__Akkermansiaceae|g__Akkermansia|s__Akkermansia_muciniphila
C2 C3	C1	37.2131	48.1013	610	79	227	38	0.00252	0.00215	0.229087	0.0332304	0.0963877	1	0.639481	0.0659385	0.264732	1	k__Bacteria|p__Firmicutes|c__Bacilli|o__Lactobacillales|f__Streptococcaceae|g__Streptococcus|s__Streptococcus_mitis
C2 C3	C1	97.8689	93.6709	610	79	597	74	3.29632	2.7904	0.240384	0.251482	0.349398	1	3.10291	0.0449833	0.220845	1	k__Bacteria|p__Firmicutes|c__Clostridia|o__Clostridiales|f__Lachnospiraceae|g__Fusicatenibacter|s__Fusicatenibacter_saccharivorans
C2 C3	C1	29.1803	25.3165	610	79	178	20	0.26847	0.226475	0.245409	0.210609	0.3137	1	1.21551	0.511667	0.810821	1	k__Bacteria|p__Firmicutes|c__Clostridia|o__Clostridiales|f__Clostridiales_unclassified|g__Monoglobus|s__Monoglobus_pectinilyticus
C2 C3	C1	74.0984	67.0886	610	79	452	53	0.058325	0.04869	0.260489	0.0268018	0.0857657	1	1.40339	0.223243	0.539959	1	k__Bacteria|p__Bacteroidetes|c__Bacteroidia|o__Bacteroidales|f__Odoribacteraceae|g__Butyricimonas|s__Butyricimonas_virosa
C2 C3	C1	65.082	75.9494	610	79	397	60	0.0018	0.0015	0.263034	0.26095	0.358305	1	0.590219	0.0581591	0.247743	1	k__Bacteria|p__Actinobacteria|c__Coriobacteriia|o__Coriobacteriales|f__Coriobacteriaceae|g__Collinsella|s__Collinsella_intestinalis
C2 C3	C1	96.5574	97.4684	610	79	589	77	0.06686	0.05566	0.264502	0.181137	0.289563	1	0.72851	1	1	1	k__Bacteria|p__Firmicutes|c__Clostridia|o__Clostridiales|f__Clostridiales_unclassified|g__Lawsonibacter|s__Lawsonibacter_asaccharolyticus
C2 C3	C1	73.1148	60.7595	610	79	446	48	0.1835	0.15268	0.265269	0.0124319	0.0498348	1	1.75635	0.0244654	0.157595	1	k__Bacteria|p__Firmicutes|c__Clostridia|o__Clostridiales|f__Ruminococcaceae|g__Ruminococcaceae_unclassified|s__Eubacterium_siraeum
C2 C3	C1	93.4426	94.9367	610	79	570	75	0.44278	0.36789	0.267316	0.274781	0.366375	1	0.76	0.80753	0.960515	1	k__Bacteria|p__Bacteroidetes|c__Bacteroidia|o__Bacteroidales|f__Rikenellaceae|g__Alistipes|s__Alistipes_finegoldii
C2 C3	C1	50	49.3671	610	79	305	39	0.04619	0.03798	0.282341	0.303985	0.390613	1	1.02564	1	1	1	k__Bacteria|p__Bacteroidetes|c__Bacteroidia|o__Bacteroidales|f__Bacteroidaceae|g__Bacteroides|s__Bacteroides_galacturonicus
C2 C3	C1	86.3934	82.2785	610	79	527	65	4.63973	3.74181	0.310305	0.0368961	0.102812	1	1.36756	0.306139	0.64341	1	k__Bacteria|p__Bacteroidetes|c__Bacteroidia|o__Bacteroidales|f__Rikenellaceae|g__Alistipes|s__Alistipes_putredinis
C2 C3	C1	32.623	31.6456	610	79	199	25	0.00671	0.0054	0.313353	0.39818	0.459296	1	1.04584	0.899152	1	1	k__Bacteria|p__Firmicutes|c__Erysipelotrichia|o__Erysipelotrichales|f__Erysipelotrichaceae|g__Dielma|s__Dielma_fastidiosa
C2 C3	C1	96.8852	89.8734	610	79	591	71	5.10287	4.0962	0.317023	0.00100685	0.00665863	0.499398	3.50482	0.00756583	0.0781803	1	k__Bacteria|p__Bacteroidetes|c__Bacteroidia|o__Bacteroidales|f__Bacteroidaceae|g__Bacteroides|s__Bacteroides_uniformis
C2 C3	C1	87.377	81.0127	610	79	533	64	0.29617	0.237405	0.319075	0.0564329	0.133927	1	1.62236	0.116821	0.380266	1	k__Bacteria|p__Bacteroidetes|c__Bacteroidia|o__Bacteroidales|f__Rikenellaceae|g__Alistipes|s__Alistipes_shahii
C2 C3	C1	66.2295	72.1519	610	79	404	57	0.00875	0.00701	0.319869	0.248104	0.345673	1	0.756941	0.312269	0.646607	1	k__Bacteria|p__Firmicutes|c__Clostridia|o__Clostridiales|f__Lachnospiraceae|g__Lachnoclostridium|s__Clostridium_citroniae
C2 C3	C1	48.5246	39.2405	610	79	296	31	0.0233	0.01839	0.341408	0.0659913	0.15224	1	1.45963	0.150437	0.41361	1	k__Bacteria|p__Firmicutes|c__Firmicutes_unclassified|o__Firmicutes_unclassified|f__Firmicutes_unclassified|g__Firmicutes_unclassified|s__Firmicutes_bacterium_CAG_95
C2 C3	C1	81.1475	79.7468	610	79	495	63	0.60882	0.47829	0.34813	0.221874	0.322713	1	1.09317	0.761293	0.960515	1	k__Bacteria|p__Firmicutes|c__Clostridia|o__Clostridiales|f__Ruminococcaceae|g__Ruminococcus|s__Ruminococcus_bicirculans
C2 C3	C1	91.9672	84.8101	610	79	561	67	0.88798	0.69611	0.351212	0.0191432	0.0688046	1	2.05056	0.0544629	0.243366	1	k__Bacteria|p__Firmicutes|c__Clostridia|o__Clostridiales|f__Eubacteriaceae|g__Eubacterium|s__Eubacterium_eligens
C2 C3	C1	72.7869	73.4177	610	79	444	58	2.53174	1.97931	0.355135	0.301617	0.38875	1	0.968425	1	1	1	k__Bacteria|p__Bacteroidetes|c__Bacteroidia|o__Bacteroidales|f__Bacteroidaceae|g__Bacteroides|s__Bacteroides_dorei
C2 C3	C1	52.1311	54.4304	610	79	318	43	0.022775	0.0177	0.363702	0.372346	0.441826	1	0.911755	0.720976	0.946042	1	k__Bacteria|p__Firmicutes|c__Erysipelotrichia|o__Erysipelotrichales|f__Erysipelotrichaceae|g__Turicibacter|s__Turicibacter_sanguinis
C2 C3	C1	37.7049	39.2405	610	79	230	31	0.372805	0.28788	0.372954	0.446428	0.474952	1	0.937182	0.806064	0.960515	1	k__Bacteria|p__Bacteroidetes|c__Bacteroidia|o__Bacteroidales|f__Rikenellaceae|g__Alistipes|s__Alistipes_inops
C2 C3	C1	38.3607	53.1646	610	79	234	42	0.0047	0.003605	0.382661	0.00593857	0.0291637	1	0.548252	0.0143823	0.115059	1	k__Bacteria|p__Firmicutes|c__Erysipelotrichia|o__Erysipelotrichales|f__Erysipelotrichaceae|g__Erysipelatoclostridium|s__Clostridium_innocuum
C2 C3	C1	69.5082	68.3544	610	79	424	54	0.01043	0.0079	0.400815	0.498176	0.499472	1	1.05536	0.896848	1	1	k__Bacteria|p__Firmicutes|c__Erysipelotrichia|o__Erysipelotrichales|f__Erysipelotrichaceae|g__Holdemania|s__Holdemania_filiformis
C2 C3	C1	67.377	62.0253	610	79	411	49	4.18947	3.15493	0.40916	0.0831447	0.175488	1	1.26449	0.374613	0.691913	1	k__Bacteria|p__Firmicutes|c__Clostridia|o__Clostridiales|f__Ruminococcaceae|g__Ruminococcus|s__Ruminococcus_bromii
C2 C3	C1	27.2131	30.3797	610	79	166	24	0.15563	0.11687	0.413216	0.307443	0.393678	1	0.856794	0.592764	0.849743	1	k__Bacteria|p__Bacteroidetes|c__Bacteroidia|o__Bacteroidales|f__Bacteroidaceae|g__Bacteroides|s__Bacteroides_intestinalis
C2 C3	C1	64.918	56.962	610	79	396	45	0.347745	0.26109	0.413483	0.0932061	0.191034	1	1.39813	0.172247	0.449657	1	k__Bacteria|p__Firmicutes|c__Firmicutes_unclassified|o__Firmicutes_unclassified|f__Firmicutes_unclassified|g__Firmicutes_unclassified|s__Firmicutes_bacterium_CAG_110
C2 C3	C1	28.0328	34.1772	610	79	171	27	0.42617	0.31682	0.427766	0.207582	0.312003	1	0.75019	0.290314	0.626068	1	k__Bacteria|p__Bacteroidetes|c__Bacteroidia|o__Bacteroidales|f__Prevotellaceae|g__Paraprevotella|s__Paraprevotella_xylaniphila
C2 C3	C1	22.623	32.9114	610	79	138	26	0.003055	0.00226	0.43485	0.0312714	0.094544	1	0.595991	0.0494808	0.230626	1	k__Bacteria|p__Firmicutes|c__Negativicutes|o__Veillonellales|f__Veillonellaceae|g__Veillonella|s__Veillonella_sp_T11011_6
C2 C3	C1	28.1967	20.2532	610	79	172	16	0.41159	0.29498	0.480591	0.0561787	0.133927	1	1.54623	0.142477	0.401527	1	k__Bacteria|p__Bacteroidetes|c__Bacteroidia|o__Bacteroidales|f__Bacteroidaceae|g__Bacteroides|s__Bacteroides_salyersiae
C2 C3	C1	90.4918	87.3418	610	79	552	69	0.046025	0.03289	0.484769	0.0348921	0.0994625	1	1.37931	0.420409	0.732258	1	k__Bacteria|p__Actinobacteria|c__Coriobacteriia|o__Eggerthellales|f__Eggerthellaceae|g__Adlercreutzia|s__Adlercreutzia_equolifaciens
C2 C3	C1	33.6066	30.3797	610	79	205	24	0.1239	0.08846	0.486079	0.219638	0.322713	1	1.15998	0.613286	0.863278	1	k__Bacteria|p__Actinobacteria|c__Coriobacteriia|o__Eggerthellales|f__Eggerthellaceae|g__Slackia|s__Slackia_isoflavoniconvertens
C2 C3	C1	82.459	74.6835	610	79	503	59	0.0135	0.00962	0.488851	0.0273729	0.0864775	1	1.59354	0.121503	0.381427	1	k__Bacteria|p__Firmicutes|c__Clostridia|o__Clostridiales|f__Clostridiales_unclassified|g__Intestinimonas|s__Intestinimonas_butyriciproducens
C2 C3	C1	90.9836	87.3418	610	79	555	69	0.07146	0.05024	0.508299	0.0144697	0.0559433	1	1.46245	0.305711	0.64341	1	k__Bacteria|p__Actinobacteria|c__Coriobacteriia|o__Eggerthellales|f__Eggerthellaceae|g__Asaccharobacter|s__Asaccharobacter_celatus
C2 C3	C1	25.082	21.519	610	79	153	17	0.08243	0.05786	0.510603	0.223817	0.322713	1	1.22101	0.57947	0.84655	1	k__Bacteria|p__Bacteroidetes|c__Bacteroidia|o__Bacteroidales|f__Tannerellaceae|g__Parabacteroides|s__Parabacteroides_johnsonii
C2 C3	C1	36.5574	35.443	610	79	223	28	0.12095	0.08264	0.549499	0.35308	0.429252	1	1.04956	0.901511	1	1	k__Bacteria|p__Firmicutes|c__Clostridia|o__Clostridiales|f__Clostridiaceae|g__Clostridium|s__Clostridium_sp_CAG_167
C2 C3	C1	90.8197	83.5443	610	79	554	66	0.009615	0.006535	0.5571	0.0318323	0.094544	1	1.94859	0.0697053	0.270108	1	k__Bacteria|p__Firmicutes|c__Clostridia|o__Clostridiales|f__Ruminococcaceae|g__Ruminococcaceae_unclassified|s__Clostridium_leptum
C2 C3	C1	29.8361	32.9114	610	79	182	26	0.004145	0.00277	0.581486	0.357422	0.429252	1	0.866822	0.603005	0.854545	1	k__Bacteria|p__Firmicutes|c__Clostridia|o__Clostridiales|f__Clostridiaceae|g__Hungatella|s__Hungatella_hathewayi
C2 C3	C1	37.8689	27.8481	610	79	231	22	0.46021	0.303315	0.601475	0.0292137	0.0905625	1	1.57916	0.0841558	0.309195	1	k__Archaea|p__Euryarchaeota|c__Methanobacteria|o__Methanobacteriales|f__Methanobacteriaceae|g__Methanobrevibacter|s__Methanobrevibacter_smithii
C2 C3	C1	72.9508	65.8228	610	79	445	52	1.04923	0.665295	0.657265	0.0212524	0.0726977	1	1.40035	0.184725	0.477207	1	k__Bacteria|p__Bacteroidetes|c__Bacteroidia|o__Bacteroidales|f__Tannerellaceae|g__Parabacteroides|s__Parabacteroides_merdae
C2 C3	C1	30.9836	32.9114	610	79	189	26	0.00671	0.00423	0.665655	0.433049	0.473111	1	0.915129	0.796432	0.960515	1	k__Bacteria|p__Firmicutes|c__Clostridia|o__Clostridiales|f__Lachnospiraceae|g__Eisenbergiella|s__Eisenbergiella_massiliensis
C2 C3	C1	24.0984	22.7848	610	79	147	18	0.00889	0.0055	0.692752	0.328997	0.41104	1	1.07595	0.888928	1	1	k__Bacteria|p__Bacteroidetes|c__Bacteroidia|o__Bacteroidales|f__Bacteroidaceae|g__Bacteroides|s__Bacteroides_nordii
C2 C3	C1	46.7213	43.038	610	79	285	34	0.44044	0.266795	0.723214	0.197618	0.303463	1	1.16063	0.551348	0.831211	1	k__Bacteria|p__Firmicutes|c__Negativicutes|o__Acidaminococcales|f__Acidaminococcaceae|g__Phascolarctobacterium|s__Phascolarctobacterium_faecium
C2 C3	C1	23.9344	22.7848	610	79	146	18	0.00341	0.00204	0.741203	0.343453	0.423763	1	1.06633	0.889036	1	1	k__Bacteria|p__Firmicutes|c__Clostridia|o__Clostridiales|f__Ruminococcaceae|g__Harryflintia|s__Harryflintia_acetispora
C2 C3	C1	67.0492	62.0253	610	79	409	49	0.04374	0.02574	0.764941	0.0489946	0.123357	1	1.24581	0.377601	0.693667	1	k__Bacteria|p__Bacteroidetes|c__Bacteroidia|o__Bacteroidales|f__Odoribacteraceae|g__Butyricimonas|s__Butyricimonas_synergistica
C2 C3	C1	35.7377	32.9114	610	79	218	26	0.371975	0.194935	0.932213	0.24781	0.345673	1	1.13363	0.707927	0.936499	1	k__Bacteria|p__Firmicutes|c__Erysipelotrichia|o__Erysipelotrichales|f__Erysipelotrichaceae|g__Holdemanella|s__Holdemanella_biformis
C2 C3	C1	29.1803	30.3797	610	79	178	24	0.002695	0.001405	0.939715	0.438563	0.473507	1	0.944252	0.895547	1	1	k__Bacteria|p__Firmicutes|c__Bacilli|o__Lactobacillales|f__Streptococcaceae|g__Streptococcus|s__Streptococcus_sp_A12
C2 C3	C1	38.8525	29.1139	610	79	237	23	0.00624	0.00323	0.950012	0.0366289	0.102644	1	1.54703	0.108716	0.364346	1	k__Bacteria|p__Firmicutes|c__Clostridia|o__Clostridiales|f__Lachnospiraceae|g__Eisenbergiella|s__Eisenbergiella_tayi
C2 C3	C1	28.8525	26.5823	610	79	176	21	0.639465	0.3201	0.998343	0.240949	0.340486	1	1.12004	0.791389	0.960515	1	k__Bacteria|p__Bacteroidetes|c__Bacteroidia|o__Bacteroidales|f__Bacteroidaceae|g__Bacteroides|s__Bacteroides_sp_CAG_144
C2 C3	C1	47.2131	32.9114	610	79	288	26	1.65152	0.823465	1.00402	0.00507082	0.0261992	1	1.82322	0.0165958	0.124259	1	k__Bacteria|p__Bacteroidetes|c__Bacteroidia|o__Bacteroidales|f__Bacteroidaceae|g__Bacteroides|s__Bacteroides_stercoris
C2 C3	C1	22.1311	27.8481	610	79	135	22	0.02221	0.01077	1.04419	0.12938	0.235928	1	0.736364	0.256146	0.569724	1	k__Bacteria|p__Firmicutes|c__Clostridia|o__Clostridiales|f__Lachnospiraceae|g__Blautia|s__Blautia_sp_CAG_257
C2 C3	C1	20.3279	21.519	610	79	124	17	0.02849	0.01336	1.09254	0.440216	0.473638	1	0.930525	0.768771	0.960515	1	k__Bacteria|p__Firmicutes|c__Clostridia|o__Clostridiales|f__Lachnospiraceae|g__Sellimonas|s__Sellimonas_intestinalis
C2 C3	C1	28.1967	20.2532	610	79	172	16	0.252785	0.11427	1.14546	0.0411937	0.111651	1	1.54623	0.142477	0.401527	1	k__Bacteria|p__Bacteroidetes|c__Bacteroidia|o__Bacteroidales|f__Bacteroidaceae|g__Bacteroides|s__Bacteroides_finegoldii
C2 C3	C1	35.9016	32.9114	610	79	219	26	0.09804	0.04058	1.2726	0.201764	0.30625	1	1.14175	0.708038	0.936499	1	k__Bacteria|p__Actinobacteria|c__Actinobacteria|o__Bifidobacteriales|f__Bifidobacteriaceae|g__Bifidobacterium|s__Bifidobacterium_animalis
C2 C3	C1	60.4918	51.8987	610	79	369	41	0.41593	0.16495	1.33431	0.0294777	0.0908134	1	1.41909	0.146041	0.404673	1	k__Bacteria|p__Bacteroidetes|c__Bacteroidia|o__Bacteroidales|f__Bacteroidaceae|g__Bacteroides|s__Bacteroides_cellulosilyticus
C2 C3	C1	27.377	26.5823	610	79	167	21	0.68645	0.27015	1.34539	0.358753	0.42981	1	1.04117	1	1	1	k__Bacteria|p__Bacteroidetes|c__Bacteroidia|o__Bacteroidales|f__Bacteroidaceae|g__Bacteroides|s__Bacteroides_faecis
C2 C3	C1	27.541	31.6456	610	79	168	25	0.04578	0.01785	1.35879	0.318357	0.400774	1	0.820995	0.42821	0.736454	1	k__Bacteria|p__Bacteroidetes|c__Bacteroidia|o__Bacteroidales|f__Prevotellaceae|g__Paraprevotella|s__Paraprevotella_clara
C2 C3	C1	30.6557	24.0506	610	79	187	19	0.00369	0.00102	1.85505	0.0671522	0.152787	1	1.39604	0.242862	0.560099	1	k__Bacteria|p__Firmicutes|c__Clostridia|o__Clostridiales|f__Ruminococcaceae|g__Pseudoflavonifractor|s__Pseudoflavonifractor_capillosus

## Sheet: Transit tim species C2C3 vs. C4
Class 1	Class2	Class 1 prevalence (%)	Class 2 prevalence (%)	Class 1 total	Class 2 total	Class 1 positives	Class 2 positives	Class 1 median relative abundance	Class 2 median relative abundance	Effect size	pvalue MWU	pvalue MWU FDR	pvalue MWU Bonferroni	oddsratio Fisher	pvalue F	pvalue F FDR	pvalue F Bonferroni	Taxonomy
C2 C3	C4	71.3115	85.0575	610	174	435	148	0.49518	2.50204	-2.33708	1.41929e-14	7.0397e-12	7.0397e-12	0.43668	0.000174114	0.00863606	0.0863606	k__Bacteria|p__Verrucomicrobia|c__Verrucomicrobiae|o__Verrucomicrobiales|f__Akkermansiaceae|g__Akkermansia|s__Akkermansia_muciniphila
C2 C3	C4	27.2131	28.1609	610	174	166	49	0.15563	0.54304	-1.80294	0.338887	0.42022	1	0.95376	0.847291	0.986169	1	k__Bacteria|p__Bacteroidetes|c__Bacteroidia|o__Bacteroidales|f__Bacteroidaceae|g__Bacteroides|s__Bacteroides_intestinalis
C2 C3	C4	38.3607	44.8276	610	174	234	78	0.0047	0.01567	-1.73727	0.0027269	0.0157272	1	0.765957	0.135728	0.401527	1	k__Bacteria|p__Firmicutes|c__Erysipelotrichia|o__Erysipelotrichales|f__Erysipelotrichaceae|g__Erysipelatoclostridium|s__Clostridium_innocuum
C2 C3	C4	42.459	60.3448	610	174	259	105	0.01317	0.03941	-1.58131	1.95486e-09	1.61602e-07	9.6961e-07	0.4849	3.36398e-05	0.00333707	0.0166853	k__Bacteria|p__Firmicutes|c__Clostridia|o__Clostridiales|f__Ruminococcaceae|g__Ruminococcaceae_unclassified|s__Ruminococcaceae_bacterium_D5
C2 C3	C4	25.082	24.1379	610	174	153	42	0.08243	0.24512	-1.57225	0.463643	0.483124	1	1.0522	0.842827	0.983629	1	k__Bacteria|p__Bacteroidetes|c__Bacteroidia|o__Bacteroidales|f__Tannerellaceae|g__Parabacteroides|s__Parabacteroides_johnsonii
C2 C3	C4	40	37.931	610	174	244	66	0.027695	0.075025	-1.43775	0.405276	0.46094	1	1.09091	0.660725	0.897863	1	k__Bacteria|p__Bacteroidetes|c__Bacteroidia|o__Bacteroidales|f__Rikenellaceae|g__Alistipes|s__Alistipes_onderdonkii
C2 C3	C4	21.8033	27.5862	610	174	133	48	0.0297	0.07964	-1.42303	0.0165006	0.0620024	1	0.731918	0.125845	0.389676	1	k__Bacteria|p__Firmicutes|c__Clostridia|o__Clostridiales|f__Clostridiaceae|g__Clostridium|s__Clostridium_sp_CAG_242
C2 C3	C4	31.4754	35.6322	610	174	192	62	0.026715	0.0666	-1.31787	0.0410679	0.111651	1	0.829758	0.31318	0.646607	1	k__Bacteria|p__Lentisphaerae|c__Lentisphaeria|o__Victivallales|f__Victivallaceae|g__Victivallis|s__Victivallis_vadensis
C2 C3	C4	32.623	36.2069	610	174	199	63	0.00671	0.01626	-1.27694	0.0389937	0.107449	1	0.853088	0.412324	0.729585	1	k__Bacteria|p__Firmicutes|c__Erysipelotrichia|o__Erysipelotrichales|f__Erysipelotrichaceae|g__Dielma|s__Dielma_fastidiosa
C2 C3	C4	86.7213	92.5287	610	174	529	161	0.1543	0.34395	-1.15646	4.69516e-07	1.4555e-05	0.00023288	0.527337	0.0462907	0.222915	1	k__Bacteria|p__Firmicutes|c__Clostridia|o__Clostridiales|f__Oscillospiraceae|g__Oscillibacter|s__Oscillibacter_sp_CAG_241
C2 C3	C4	38.8525	54.023	610	174	237	94	0.00624	0.013045	-1.06388	6.94693e-06	0.000156622	0.00344568	0.540756	0.000479397	0.0148613	0.237781	k__Bacteria|p__Firmicutes|c__Clostridia|o__Clostridiales|f__Lachnospiraceae|g__Eisenbergiella|s__Eisenbergiella_tayi
C2 C3	C4	99.5082	100	610	174	607	174	0.06762	0.140935	-1.05951	1.81564e-13	4.50278e-11	9.00555e-11	0	1	1	1	k__Bacteria|p__Firmicutes|c__Clostridia|o__Clostridiales|f__Ruminococcaceae|g__Ruthenibacterium|s__Ruthenibacterium_lactatiformans
C2 C3	C4	93.4426	98.2759	610	174	570	171	0.44278	0.91142	-1.04153	1.6899e-08	1.04774e-06	8.3819e-06	0.25	0.0128193	0.107681	1	k__Bacteria|p__Bacteroidetes|c__Bacteroidia|o__Bacteroidales|f__Rikenellaceae|g__Alistipes|s__Alistipes_finegoldii
C2 C3	C4	49.0164	66.6667	610	174	299	116	0.03031	0.058735	-0.954427	4.23376e-07	1.4555e-05	0.000209994	0.480707	4.79497e-05	0.00396384	0.023783	k__Bacteria|p__Firmicutes|c__Clostridia|o__Clostridiales|f__Clostridiaceae|g__Clostridium|s__Clostridium_disporicum
C2 C3	C4	61.6393	77.0115	610	174	376	134	0.037285	0.0708	-0.925154	1.46366e-07	6.04981e-06	7.25977e-05	0.479653	0.000147357	0.00842227	0.073089	k__Bacteria|p__Proteobacteria|c__Gammaproteobacteria|o__Enterobacterales|f__Enterobacteriaceae|g__Escherichia|s__Escherichia_coli
C2 C3	C4	65.082	71.8391	610	174	397	125	0.04316	0.08119	-0.911607	0.000335405	0.00298607	0.166361	0.730629	0.101542	0.351151	1	k__Bacteria|p__Bacteroidetes|c__Bacteroidia|o__Bacteroidales|f__Rikenellaceae|g__Alistipes|s__Alistipes_indistinctus
C2 C3	C4	37.8689	50.5747	610	174	231	88	0.46021	0.863915	-0.908597	1.18605e-05	0.000255775	0.00588283	0.595646	0.00293591	0.0428298	1	k__Archaea|p__Euryarchaeota|c__Methanobacteria|o__Methanobacteriales|f__Methanobacteriaceae|g__Methanobrevibacter|s__Methanobrevibacter_smithii
C2 C3	C4	35.9016	40.2299	610	174	219	70	0.09804	0.1818	-0.89091	0.050651	0.126246	1	0.832152	0.327215	0.653559	1	k__Bacteria|p__Actinobacteria|c__Actinobacteria|o__Bifidobacteriales|f__Bifidobacteriaceae|g__Bifidobacterium|s__Bifidobacterium_animalis
C2 C3	C4	71.9672	87.3563	610	174	439	152	0.01169	0.02036	-0.800463	7.99369e-12	1.32162e-09	3.96487e-09	0.371576	1.60055e-05	0.00264624	0.00793873	k__Bacteria|p__Firmicutes|c__Clostridia|o__Clostridiales|f__Ruminococcaceae|g__Anaeromassilibacillus|s__Anaeromassilibacillus_sp_An250
C2 C3	C4	23.9344	30.4598	610	174	146	53	0.07863	0.1364	-0.794692	0.0221081	0.074596	1	0.718364	0.0930108	0.3343	1	k__Bacteria|p__Bacteroidetes|c__Bacteroidia|o__Bacteroidales|f__Tannerellaceae|g__Parabacteroides|s__Parabacteroides_goldsteinii
C2 C3	C4	22.623	26.4368	610	174	138	46	0.116045	0.19872	-0.776053	0.120647	0.225815	1	0.813559	0.310999	0.646607	1	k__Bacteria|p__Actinobacteria|c__Actinobacteria|o__Bifidobacteriales|f__Bifidobacteriaceae|g__Bifidobacterium|s__Bifidobacterium_catenulatum
C2 C3	C4	26.0656	35.6322	610	174	159	62	0.00098	0.001675	-0.773307	0.00204314	0.0123585	1	0.636864	0.0167556	0.124259	1	k__Bacteria|p__Actinobacteria|c__Actinobacteria|o__Actinomycetales|f__Actinomycetaceae|g__Actinomyces|s__Actinomyces_odontolyticus
C2 C3	C4	40.3279	46.5517	610	174	246	81	0.04267	0.07253	-0.765356	0.0308632	0.0939149	1	0.775946	0.163079	0.440996	1	k__Bacteria|p__Firmicutes|c__Clostridia|o__Clostridiales|f__Ruminococcaceae|g__Ruminococcus|s__Ruminococcus_callidus
C2 C3	C4	35.5738	27.5862	610	174	217	48	0.00439	0.007365	-0.746465	0.0468453	0.12039	1	1.44943	0.0562782	0.247743	1	k__Bacteria|p__Firmicutes|c__Clostridia|o__Clostridiales|f__Lachnospiraceae|g__Lachnoclostridium|s__Clostridium_asparagiforme
C2 C3	C4	88.3607	86.7816	610	174	539	151	0.07679	0.12596	-0.713975	0.0113057	0.0470704	1	1.15633	0.59691	0.850768	1	k__Bacteria|p__Firmicutes|c__Firmicutes_unclassified|o__Firmicutes_unclassified|f__Firmicutes_unclassified|g__Firmicutes_unclassified|s__Firmicutes_bacterium_CAG_83
C2 C3	C4	45.7377	39.0805	610	174	279	68	0.03339	0.05424	-0.699941	0.177952	0.285644	1	1.31393	0.120585	0.380956	1	k__Bacteria|p__Firmicutes|c__Clostridia|o__Clostridiales|f__Lachnospiraceae|g__Blautia|s__Ruminococcus_gnavus
C2 C3	C4	94.0984	89.0805	610	174	574	155	0.045655	0.07411	-0.698895	0.0453477	0.119008	1	1.95448	0.0282908	0.16705	1	k__Bacteria|p__Firmicutes|c__Clostridia|o__Clostridiales|f__Ruminococcaceae|g__Flavonifractor|s__Flavonifractor_plautii
C2 C3	C4	87.377	86.2069	610	174	533	150	0.29617	0.47804	-0.690706	1.649e-05	0.000340793	0.00817904	1.10753	0.70075	0.936499	1	k__Bacteria|p__Bacteroidetes|c__Bacteroidia|o__Bacteroidales|f__Rikenellaceae|g__Alistipes|s__Alistipes_shahii
C2 C3	C4	20.3279	29.3103	610	174	124	51	0.001425	0.00229	-0.684386	0.00198015	0.0121254	0.982156	0.615347	0.017286	0.124259	1	k__Bacteria|p__Synergistetes|c__Synergistia|o__Synergistales|f__Synergistaceae|g__Fretibacterium|s__Fretibacterium_fastidiosum
C2 C3	C4	64.918	78.1609	610	174	396	136	0.347745	0.55559	-0.675991	4.53866e-07	1.4555e-05	0.000225117	0.517042	0.000898744	0.0195353	0.445777	k__Bacteria|p__Firmicutes|c__Firmicutes_unclassified|o__Firmicutes_unclassified|f__Firmicutes_unclassified|g__Firmicutes_unclassified|s__Firmicutes_bacterium_CAG_110
C2 C3	C4	83.2787	90.8046	610	174	508	158	1.20433	1.87303	-0.637143	1.65489e-06	4.10413e-05	0.000820825	0.504344	0.0157662	0.124127	1	k__Bacteria|p__Bacteroidetes|c__Bacteroidia|o__Bacteroidales|f__Barnesiellaceae|g__Barnesiella|s__Barnesiella_intestinihominis
C2 C3	C4	35.5738	48.2759	610	174	217	84	0.03073	0.047215	-0.619598	0.000200359	0.00225859	0.0993781	0.591603	0.00266943	0.0401223	1	k__Bacteria|p__Firmicutes|c__Clostridia|o__Clostridiales|f__Lachnospiraceae|g__Roseburia|s__Roseburia_sp_CAG_309
C2 C3	C4	46.0656	53.4483	610	174	281	93	0.00114	0.00173	-0.601738	0.0111784	0.0469872	1	0.743896	0.101947	0.351151	1	k__Bacteria|p__Actinobacteria|c__Coriobacteriia|o__Coriobacteriales|f__Coriobacteriaceae|g__Enorma|s__Enorma_massiliensis
C2 C3	C4	82.459	87.3563	610	174	503	152	0.0135	0.02005	-0.570643	0.000621122	0.00472117	0.308076	0.680398	0.133041	0.399928	1	k__Bacteria|p__Firmicutes|c__Clostridia|o__Clostridiales|f__Clostridiales_unclassified|g__Intestinimonas|s__Intestinimonas_butyriciproducens
C2 C3	C4	22.623	33.3333	610	174	138	58	0.50255	0.73944	-0.557166	0.000224421	0.00241114	0.111313	0.584746	0.0053365	0.0615559	1	k__Bacteria|p__Proteobacteria|c__Deltaproteobacteria|o__Desulfovibrionales|f__Desulfovibrionaceae|g__Desulfovibrio|s__Desulfovibrio_piger
C2 C3	C4	39.1803	42.5287	610	174	239	74	0.00821	0.01196	-0.542763	0.142372	0.251305	1	0.870547	0.431004	0.737166	1	k__Bacteria|p__Firmicutes|c__Firmicutes_unclassified|o__Firmicutes_unclassified|f__Firmicutes_unclassified|g__Firmicutes_unclassified|s__Firmicutes_bacterium_CAG_145
C2 C3	C4	21.9672	35.0575	610	174	134	61	0.00397	0.00576	-0.53693	0.000111952	0.00135435	0.0555284	0.521491	0.000682935	0.0178282	0.338736	k__Bacteria|p__Firmicutes|c__Clostridia|o__Clostridiales|f__Ruminococcaceae|g__Pseudoflavonifractor|s__Pseudoflavonifractor_sp_An184
C2 C3	C4	69.5082	68.3908	610	174	424	119	0.01043	0.01487	-0.511665	0.125862	0.230931	1	1.05358	0.780531	0.960515	1	k__Bacteria|p__Firmicutes|c__Erysipelotrichia|o__Erysipelotrichales|f__Erysipelotrichaceae|g__Holdemania|s__Holdemania_filiformis
C2 C3	C4	73.6066	74.1379	610	174	449	129	0.05766	0.0812	-0.493909	0.138406	0.248729	1	0.972844	0.922488	1	1	k__Bacteria|p__Firmicutes|c__Bacilli|o__Lactobacillales|f__Streptococcaceae|g__Streptococcus|s__Streptococcus_thermophilus
C2 C3	C4	90.1639	91.954	610	174	550	160	0.075425	0.10601	-0.491086	0.00121778	0.00784441	0.60402	0.802083	0.557593	0.834444	1	k__Bacteria|p__Proteobacteria|c__Deltaproteobacteria|o__Desulfovibrionales|f__Desulfovibrionaceae|g__Bilophila|s__Bilophila_wadsworthia
C2 C3	C4	67.0492	72.9885	610	174	409	127	0.04374	0.05934	-0.440052	0.0181765	0.0670021	1	0.753046	0.140651	0.401527	1	k__Bacteria|p__Bacteroidetes|c__Bacteroidia|o__Bacteroidales|f__Odoribacteraceae|g__Butyricimonas|s__Butyricimonas_synergistica
C2 C3	C4	76.3934	82.7586	610	174	466	144	0.053395	0.072275	-0.436792	0.0083386	0.0372608	1	0.67419	0.0792107	0.295402	1	k__Bacteria|p__Firmicutes|c__Clostridia|o__Clostridiales|f__Peptostreptococcaceae|g__Intestinibacter|s__Intestinibacter_bartlettii
C2 C3	C4	26.5574	21.2644	610	174	162	37	0.00248	0.00335	-0.433821	0.11354	0.217435	1	1.33892	0.167777	0.442646	1	k__Bacteria|p__Firmicutes|c__Bacilli|o__Lactobacillales|f__Streptococcaceae|g__Streptococcus|s__Streptococcus_australis
C2 C3	C4	73.1148	82.7586	610	174	446	144	0.1835	0.24659	-0.426334	0.000894607	0.00619866	0.443725	0.566565	0.00950106	0.0856823	1	k__Bacteria|p__Firmicutes|c__Clostridia|o__Clostridiales|f__Ruminococcaceae|g__Ruminococcaceae_unclassified|s__Eubacterium_siraeum
C2 C3	C4	23.6066	31.6092	610	174	144	55	0.54146	0.72052	-0.412184	0.00750859	0.0338569	1	0.668591	0.0379522	0.196086	1	k__Bacteria|p__Firmicutes|c__Clostridia|o__Clostridiales|f__Eubacteriaceae|g__Eubacterium|s__Eubacterium_sp_CAG_251
C2 C3	C4	74.0984	79.3103	610	174	452	138	0.898355	1.18976	-0.405313	0.000446547	0.00369146	0.221487	0.746285	0.164996	0.440996	1	k__Bacteria|p__Bacteroidetes|c__Bacteroidia|o__Bacteroidales|f__Bacteroidaceae|g__Bacteroides|s__Bacteroides_caccae
C2 C3	C4	35.9016	40.2299	610	174	219	70	0.00256	0.00333	-0.379378	0.0852274	0.179099	1	0.832152	0.327215	0.653559	1	k__Bacteria|p__Actinobacteria|c__Actinobacteria|o__Micrococcales|f__Micrococcaceae|g__Rothia|s__Rothia_mucilaginosa
C2 C3	C4	28.8525	39.6552	610	174	176	69	0.639465	0.82953	-0.375429	0.00132032	0.00839589	0.654879	0.617111	0.00926502	0.0851009	1	k__Bacteria|p__Bacteroidetes|c__Bacteroidia|o__Bacteroidales|f__Bacteroidaceae|g__Bacteroides|s__Bacteroides_sp_CAG_144
C2 C3	C4	74.0984	76.4368	610	174	452	133	0.058325	0.07537	-0.369876	0.0297984	0.0912348	1	0.881888	0.555159	0.834421	1	k__Bacteria|p__Bacteroidetes|c__Bacteroidia|o__Bacteroidales|f__Odoribacteraceae|g__Butyricimonas|s__Butyricimonas_virosa
C2 C3	C4	71.4754	76.4368	610	174	436	133	1.43751	1.84778	-0.362221	0.0323439	0.0949266	1	0.772448	0.211283	0.521375	1	k__Bacteria|p__Actinobacteria|c__Actinobacteria|o__Bifidobacteriales|f__Bifidobacteriaceae|g__Bifidobacterium|s__Bifidobacterium_adolescentis
C2 C3	C4	90.8197	95.977	610	174	554	167	0.009615	0.01232	-0.357643	6.12648e-05	0.000893745	0.0303873	0.414671	0.026615	0.16705	1	k__Bacteria|p__Firmicutes|c__Clostridia|o__Clostridiales|f__Ruminococcaceae|g__Ruminococcaceae_unclassified|s__Clostridium_leptum
C2 C3	C4	48.5246	54.023	610	174	296	94	0.0233	0.029855	-0.357643	0.0523829	0.128623	1	0.802277	0.228844	0.540589	1	k__Bacteria|p__Firmicutes|c__Firmicutes_unclassified|o__Firmicutes_unclassified|f__Firmicutes_unclassified|g__Firmicutes_unclassified|s__Firmicutes_bacterium_CAG_95
C2 C3	C4	52.1311	52.8736	610	174	318	92	0.00635	0.008015	-0.335946	0.311863	0.396456	1	0.970667	0.931459	1	1	k__Bacteria|p__Firmicutes|c__Clostridia|o__Clostridiales|f__Ruminococcaceae|g__Anaerotruncus|s__Anaerotruncus_colihominis
C2 C3	C4	34.4262	25.2874	610	174	210	44	0.011455	0.014435	-0.333594	0.0198175	0.0696078	1	1.55114	0.0273091	0.16705	1	k__Bacteria|p__Firmicutes|c__Clostridia|o__Clostridiales|f__Lachnospiraceae|g__Blautia|s__Blautia_hydrogenotrophica
C2 C3	C4	66.3934	68.9655	610	174	405	120	0.08148	0.102295	-0.328218	0.11169	0.215558	1	0.889024	0.583688	0.847281	1	k__Bacteria|p__Firmicutes|c__Clostridia|o__Clostridiales|f__Clostridiaceae|g__Clostridium|s__Clostridium_sp_CAG_58
C2 C3	C4	46.3934	45.4023	610	174	283	79	0.0053	0.00661	-0.318658	0.438367	0.473507	1	1.04072	0.863231	0.988828	1	k__Bacteria|p__Firmicutes|c__Clostridia|o__Clostridiales|f__Lachnospiraceae|g__Lachnoclostridium|s__Clostridium_lavalense
C2 C3	C4	24.0984	33.3333	610	174	147	58	0.00889	0.01107	-0.3164	0.00576223	0.0288694	1	0.634989	0.0186759	0.130468	1	k__Bacteria|p__Bacteroidetes|c__Bacteroidia|o__Bacteroidales|f__Bacteroidaceae|g__Bacteroides|s__Bacteroides_nordii
C2 C3	C4	91.4754	94.8276	610	174	558	165	1.03957	1.27474	-0.294223	0.00424294	0.022629	1	0.585315	0.197984	0.498551	1	k__Bacteria|p__Bacteroidetes|c__Bacteroidia|o__Bacteroidales|f__Tannerellaceae|g__Parabacteroides|s__Parabacteroides_distasonis
C2 C3	C4	59.8361	65.5172	610	174	365	114	0.00131	0.001605	-0.293006	0.0273431	0.0864775	1	0.784103	0.186761	0.479966	1	k__Bacteria|p__Actinobacteria|c__Coriobacteriia|o__Coriobacteriales|f__Coriobacteriaceae|g__Enorma|s__[Collinsella]_massiliensis
C2 C3	C4	28.1967	31.0345	610	174	172	54	0.00898	0.010945	-0.285485	0.182412	0.289563	1	0.872653	0.506673	0.808803	1	k__Bacteria|p__Firmicutes|c__Clostridia|o__Clostridiales|f__Lachnospiraceae|g__Lachnoclostridium|s__Clostridium_symbiosum
C2 C3	C4	87.8689	90.8046	610	174	536	158	0.56845	0.692495	-0.28477	0.00731728	0.033297	1	0.733493	0.345357	0.661633	1	k__Bacteria|p__Firmicutes|c__Clostridia|o__Clostridiales|f__Oscillospiraceae|g__Oscillibacter|s__Oscillibacter_sp_57_20
C2 C3	C4	29.0164	37.3563	610	174	177	65	0.00825	0.00986	-0.257194	0.0159496	0.0603893	1	0.685486	0.0406411	0.206031	1	k__Bacteria|p__Firmicutes|c__Bacilli|o__Lactobacillales|f__Streptococcaceae|g__Lactococcus|s__Lactococcus_lactis
C2 C3	C4	43.4426	55.1724	610	174	265	96	0.0297	0.035415	-0.253898	0.00167779	0.0104023	0.832183	0.624094	0.00743433	0.0781803	1	k__Bacteria|p__Firmicutes|c__Firmicutes_unclassified|o__Firmicutes_unclassified|f__Firmicutes_unclassified|g__Firmicutes_unclassified|s__Firmicutes_bacterium_CAG_94
C2 C3	C4	93.9344	95.4023	610	174	573	166	0.63746	0.75465	-0.243473	6.69646e-05	0.000948984	0.0332144	0.746337	0.580296	0.84655	1	k__Bacteria|p__Bacteroidetes|c__Bacteroidia|o__Bacteroidales|f__Odoribacteraceae|g__Odoribacter|s__Odoribacter_splanchnicus
C2 C3	C4	49.6721	58.046	610	174	303	101	0.0067	0.00791	-0.239517	0.00878504	0.0389052	1	0.713355	0.0584394	0.247743	1	k__Bacteria|p__Firmicutes|c__Clostridia|o__Clostridiales|f__Lachnospiraceae|g__Lachnoclostridium|s__Clostridium_bolteae
C2 C3	C4	86.3934	94.8276	610	174	527	165	4.63973	5.4532	-0.233062	2.15164e-05	0.000395264	0.0106721	0.346331	0.00191021	0.031722	0.947462	k__Bacteria|p__Bacteroidetes|c__Bacteroidia|o__Bacteroidales|f__Rikenellaceae|g__Alistipes|s__Alistipes_putredinis
C2 C3	C4	24.0984	27.0115	610	174	147	47	0.87431	1.01454	-0.214609	0.165542	0.270053	1	0.857911	0.427411	0.736454	1	k__Bacteria|p__Firmicutes|c__Clostridia|o__Clostridiales|f__Eubacteriaceae|g__Eubacterium|s__Eubacterium_sp_CAG_180
C2 C3	C4	37.2131	36.2069	610	174	227	63	0.00252	0.00292	-0.212545	0.479553	0.491442	1	1.04426	0.85884	0.986169	1	k__Bacteria|p__Firmicutes|c__Bacilli|o__Lactobacillales|f__Streptococcaceae|g__Streptococcus|s__Streptococcus_mitis
C2 C3	C4	30.6557	33.908	610	174	187	59	0.00369	0.00422	-0.193622	0.166061	0.270053	1	0.861682	0.458796	0.76108	1	k__Bacteria|p__Firmicutes|c__Clostridia|o__Clostridiales|f__Ruminococcaceae|g__Pseudoflavonifractor|s__Pseudoflavonifractor_capillosus
C2 C3	C4	94.0984	95.977	610	174	574	167	0.049645	0.05652	-0.187113	0.146819	0.253499	1	0.66833	0.450095	0.755687	1	k__Bacteria|p__Firmicutes|c__Bacilli|o__Lactobacillales|f__Streptococcaceae|g__Streptococcus|s__Streptococcus_salivarius
C2 C3	C4	86.5574	90.2299	610	174	528	157	1.5487	1.76174	-0.185943	0.0197387	0.0696078	1	0.697219	0.243914	0.560099	1	k__Bacteria|p__Actinobacteria|c__Coriobacteriia|o__Coriobacteriales|f__Coriobacteriaceae|g__Collinsella|s__Collinsella_aerofaciens
C2 C3	C4	81.9672	81.0345	610	174	500	141	0.01356	0.01539	-0.182636	0.419758	0.465772	1	1.06383	0.823907	0.970684	1	k__Bacteria|p__Firmicutes|c__Bacilli|o__Lactobacillales|f__Streptococcaceae|g__Streptococcus|s__Streptococcus_parasanguinis
C2 C3	C4	29.8361	41.3793	610	174	182	72	0.004145	0.0047	-0.181289	0.000899805	0.00619866	0.446304	0.602414	0.0057463	0.0647765	1	k__Bacteria|p__Firmicutes|c__Clostridia|o__Clostridiales|f__Clostridiaceae|g__Hungatella|s__Hungatella_hathewayi
C2 C3	C4	91.9672	94.2529	610	174	561	164	0.88798	1.00612	-0.18021	0.321377	0.403551	1	0.698109	0.414805	0.729585	1	k__Bacteria|p__Firmicutes|c__Clostridia|o__Clostridiales|f__Eubacteriaceae|g__Eubacterium|s__Eubacterium_eligens
C2 C3	C4	47.2131	47.7011	610	174	288	83	1.65152	1.8607	-0.172051	0.442039	0.473717	1	0.980618	0.931539	1	1	k__Bacteria|p__Bacteroidetes|c__Bacteroidia|o__Bacteroidales|f__Bacteroidaceae|g__Bacteroides|s__Bacteroides_stercoris
C2 C3	C4	20.3279	33.908	610	174	124	59	0.003675	0.00414	-0.171887	7.65158e-05	0.00104474	0.0379518	0.497315	0.000345874	0.0131964	0.171554	k__Bacteria|p__Firmicutes|c__Clostridia|o__Clostridiales|f__Ruminococcaceae|g__Flavonifractor|s__Flavonifractor_sp_An100
C2 C3	C4	61.4754	62.6437	610	174	375	109	0.01806	0.02006	-0.151524	0.355073	0.429252	1	0.951591	0.791615	0.960515	1	k__Bacteria|p__Actinobacteria|c__Coriobacteriia|o__Eggerthellales|f__Eggerthellaceae|g__Eggerthella|s__Eggerthella_lenta
C2 C3	C4	65.082	62.069	610	174	397	108	0.0018	0.001995	-0.148392	0.33081	0.412265	1	1.13902	0.473669	0.767777	1	k__Bacteria|p__Actinobacteria|c__Coriobacteriia|o__Coriobacteriales|f__Coriobacteriaceae|g__Collinsella|s__Collinsella_intestinalis
C2 C3	C4	81.4754	89.0805	610	174	497	155	0.01228	0.01356	-0.143047	0.0215445	0.0731923	1	0.539138	0.0211348	0.143601	1	k__Bacteria|p__Firmicutes|c__Clostridia|o__Clostridiales|f__Peptostreptococcaceae|g__Romboutsia|s__Romboutsia_ilealis
C2 C3	C4	37.541	36.7816	610	174	229	64	0.43149	0.475085	-0.138859	0.48719	0.494164	1	1.03305	0.929243	1	1	k__Bacteria|p__Firmicutes|c__Negativicutes|o__Veillonellales|f__Veillonellaceae|g__Dialister|s__Dialister_invisus
C2 C3	C4	86.3934	84.4828	610	174	527	147	0.42226	0.46252	-0.131384	0.439139	0.473507	1	1.16622	0.536688	0.82399	1	k__Bacteria|p__Bacteroidetes|c__Bacteroidia|o__Bacteroidales|f__Bacteroidaceae|g__Bacteroides|s__Bacteroides_thetaiotaomicron
C2 C3	C4	24.918	31.0345	610	174	152	54	0.582295	0.631405	-0.116815	0.0315693	0.094544	1	0.737506	0.118177	0.380266	1	k__Bacteria|p__Bacteroidetes|c__Bacteroidia|o__Bacteroidales|f__Bacteroidaceae|g__Bacteroides|s__Bacteroides_eggerthii
C2 C3	C4	91.9672	94.2529	610	174	561	164	0.47615	0.509695	-0.0982181	0.141021	0.250704	1	0.698109	0.414805	0.729585	1	k__Bacteria|p__Firmicutes|c__Clostridia|o__Clostridiales|f__Lachnospiraceae|g__Coprococcus|s__Coprococcus_catus
C2 C3	C4	47.8689	50	610	174	292	87	0.270315	0.28932	-0.0980245	0.266075	0.3596	1	0.918239	0.667354	0.904392	1	k__Bacteria|p__Bacteroidetes|c__Bacteroidia|o__Bacteroidales|f__Bacteroidaceae|g__Bacteroides|s__Bacteroides_fragilis
C2 C3	C4	65.082	75.2874	610	174	397	131	0.10695	0.11446	-0.097907	0.0420929	0.113468	1	0.611798	0.013176	0.107681	1	k__Bacteria|p__Bacteroidetes|c__Bacteroidia|o__Bacteroidales|f__Barnesiellaceae|g__Coprobacter|s__Coprobacter_fastidiosus
C2 C3	C4	23.9344	29.3103	610	174	146	51	0.00341	0.00364	-0.0941667	0.0731829	0.160725	1	0.758874	0.165373	0.440996	1	k__Bacteria|p__Firmicutes|c__Clostridia|o__Clostridiales|f__Ruminococcaceae|g__Harryflintia|s__Harryflintia_acetispora
C2 C3	C4	60.6557	62.069	610	174	370	108	0.56045	0.59815	-0.0939216	0.381364	0.445189	1	0.94213	0.791691	0.960515	1	k__Bacteria|p__Firmicutes|c__Clostridia|o__Clostridiales|f__Ruminococcaceae|g__Ruminococcus|s__Ruminococcus_lactaris
C2 C3	C4	54.4262	36.2069	610	174	332	63	0.008865	0.00945	-0.0921937	7.79343e-05	0.00104474	0.0386554	2.10415	2.38567e-05	0.00295823	0.0118329	k__Bacteria|p__Firmicutes|c__Negativicutes|o__Veillonellales|f__Veillonellaceae|g__Veillonella|s__Veillonella_parvula
C2 C3	C4	47.0492	54.5977	610	174	287	95	0.02676	0.0285	-0.0908838	0.0343725	0.0991208	1	0.738895	0.085715	0.312608	1	k__Bacteria|p__Bacteroidetes|c__Bacteroidia|o__Bacteroidales|f__Barnesiellaceae|g__Coprobacter|s__Coprobacter_secundus
C2 C3	C4	98.8525	98.8506	610	174	603	172	0.65089	0.69033	-0.0848724	0.354202	0.429252	1	1.00166	1	1	1	k__Bacteria|p__Firmicutes|c__Clostridia|o__Clostridiales|f__Lachnospiraceae|g__Blautia|s__Blautia_obeum
C2 C3	C4	60.4918	64.9425	610	174	369	113	0.41593	0.43758	-0.0732061	0.139185	0.249226	1	0.826534	0.33137	0.657437	1	k__Bacteria|p__Bacteroidetes|c__Bacteroidia|o__Bacteroidales|f__Bacteroidaceae|g__Bacteroides|s__Bacteroides_cellulosilyticus
C2 C3	C4	28.3607	28.1609	610	174	173	49	0.2547	0.26651	-0.0653907	0.443423	0.474004	1	1.0099	1	1	1	k__Bacteria|p__Bacteroidetes|c__Bacteroidia|o__Bacteroidales|f__Bacteroidaceae|g__Bacteroides|s__Bacteroides_clarus
C2 C3	C4	81.1475	79.8851	610	174	495	139	0.60882	0.63533	-0.0614904	0.140269	0.250265	1	1.08383	0.743205	0.960515	1	k__Bacteria|p__Firmicutes|c__Clostridia|o__Clostridiales|f__Ruminococcaceae|g__Ruminococcus|s__Ruminococcus_bicirculans
C2 C3	C4	85.082	90.8046	610	174	519	158	0.0232	0.02399	-0.0483084	0.102803	0.205115	1	0.577549	0.0599527	0.251771	1	k__Bacteria|p__Actinobacteria|c__Coriobacteriia|o__Eggerthellales|f__Eggerthellaceae|g__Gordonibacter|s__Gordonibacter_pamelaeae
C2 C3	C4	87.377	89.0805	610	174	533	155	5.24019	5.41302	-0.0468146	0.293761	0.382429	1	0.848513	0.601732	0.854545	1	k__Bacteria|p__Bacteroidetes|c__Bacteroidia|o__Bacteroidales|f__Bacteroidaceae|g__Bacteroides|s__Bacteroides_vulgatus
C2 C3	C4	51.6393	66.6667	610	174	315	116	0.00228	0.00232	-0.025091	0.000620987	0.00472117	0.30801	0.533898	0.000527619	0.015394	0.261699	k__Bacteria|p__Firmicutes|c__Clostridia|o__Clostridiales|f__Ruminococcaceae|g__Ruminococcaceae_unclassified|s__Ruminococcaceae_bacterium_D16
C2 C3	C4	87.541	91.954	610	174	534	160	0.01595	0.016155	-0.0184243	0.0759899	0.165311	1	0.614803	0.137176	0.401527	1	k__Bacteria|p__Actinobacteria|c__Coriobacteriia|o__Coriobacteriales|f__Coriobacteriaceae|g__Collinsella|s__Collinsella_stercoris
C2 C3	C4	37.7049	52.8736	610	174	230	92	0.372805	0.374645	-0.00710299	0.000311392	0.00287618	0.15445	0.539474	0.000455144	0.0148613	0.225751	k__Bacteria|p__Bacteroidetes|c__Bacteroidia|o__Bacteroidales|f__Rikenellaceae|g__Alistipes|s__Alistipes_inops
C2 C3	C4	61.3115	66.6667	610	174	374	116	0.8227	0.82409	-0.00243546	0.11096	0.215558	1	0.792373	0.214458	0.523995	1	k__Bacteria|p__Firmicutes|c__Clostridia|o__Clostridiales|f__Lachnospiraceae|g__Coprococcus|s__Coprococcus_eutactus
C2 C3	C4	68.6885	64.9425	610	174	419	113	0.00165	0.00164	0.00877021	0.279945	0.370274	1	1.18422	0.358509	0.675232	1	k__Bacteria|p__Actinobacteria|c__Coriobacteriia|o__Eggerthellales|f__Eggerthellaceae|g__Enterorhabdus|s__Enterorhabdus_caecimuris
C2 C3	C4	96.8852	98.2759	610	174	591	171	5.10287	5.05166	0.0145513	0.261505	0.358305	1	0.545706	0.439662	0.746823	1	k__Bacteria|p__Bacteroidetes|c__Bacteroidia|o__Bacteroidales|f__Bacteroidaceae|g__Bacteroides|s__Bacteroides_uniformis
C2 C3	C4	29.1803	31.0345	610	174	178	54	0.26847	0.2656	0.0155057	0.307958	0.393678	1	0.915638	0.638768	0.878042	1	k__Bacteria|p__Firmicutes|c__Clostridia|o__Clostridiales|f__Clostridiales_unclassified|g__Monoglobus|s__Monoglobus_pectinilyticus
C2 C3	C4	72.9508	77.0115	610	174	445	134	1.04923	1.0362	0.0180285	0.0766746	0.166073	1	0.805066	0.328097	0.653559	1	k__Bacteria|p__Bacteroidetes|c__Bacteroidia|o__Bacteroidales|f__Tannerellaceae|g__Parabacteroides|s__Parabacteroides_merdae
C2 C3	C4	96.5574	97.1264	610	174	589	169	0.06686	0.06566	0.0261286	0.379124	0.444552	1	0.829811	0.814955	0.962423	1	k__Bacteria|p__Firmicutes|c__Clostridia|o__Clostridiales|f__Clostridiales_unclassified|g__Lawsonibacter|s__Lawsonibacter_asaccharolyticus
C2 C3	C4	85.082	87.3563	610	174	519	152	0.69627	0.680125	0.0338469	0.265228	0.3596	1	0.825477	0.540671	0.82399	1	k__Bacteria|p__Actinobacteria|c__Actinobacteria|o__Bifidobacteriales|f__Bifidobacteriaceae|g__Bifidobacterium|s__Bifidobacterium_longum
C2 C3	C4	52.1311	64.9425	610	174	318	113	0.022775	0.0222	0.0368914	0.000343059	0.00298607	0.170157	0.587889	0.00324947	0.0447704	1	k__Bacteria|p__Firmicutes|c__Erysipelotrichia|o__Erysipelotrichales|f__Erysipelotrichaceae|g__Turicibacter|s__Turicibacter_sanguinis
C2 C3	C4	34.5902	27.0115	610	174	211	47	0.00233	0.00225	0.050405	0.0185356	0.0676004	1	1.42894	0.0673589	0.265159	1	k__Bacteria|p__Actinobacteria|c__Actinobacteria|o__Actinomycetales|f__Actinomycetaceae|g__Actinomyces|s__Actinomyces_sp_ICM47
C2 C3	C4	27.377	24.7126	610	174	167	43	0.68645	0.66185	0.0526504	0.246965	0.345673	1	1.14846	0.560439	0.834769	1	k__Bacteria|p__Bacteroidetes|c__Bacteroidia|o__Bacteroidales|f__Bacteroidaceae|g__Bacteroides|s__Bacteroides_faecis
C2 C3	C4	67.377	73.5632	610	174	411	128	4.18947	3.9881	0.0710662	0.147456	0.253499	1	0.742227	0.137898	0.401527	1	k__Bacteria|p__Firmicutes|c__Clostridia|o__Clostridiales|f__Ruminococcaceae|g__Ruminococcus|s__Ruminococcus_bromii
C2 C3	C4	91.8033	95.4023	610	174	560	166	0.540615	0.5126	0.0767681	0.362966	0.432767	1	0.539759	0.138543	0.401527	1	k__Bacteria|p__Bacteroidetes|c__Bacteroidia|o__Bacteroidales|f__Bacteroidaceae|g__Bacteroides|s__Bacteroides_ovatus
C2 C3	C4	95.5738	98.2759	610	174	583	171	0.94171	0.89026	0.0810561	0.165069	0.270053	1	0.378817	0.118846	0.380266	1	k__Bacteria|p__Firmicutes|c__Clostridia|o__Clostridiales|f__Lachnospiraceae|g__Dorea|s__Dorea_longicatena
C2 C3	C4	36.3934	36.7816	610	174	222	64	0.709535	0.665515	0.0924027	0.498157	0.499472	1	0.983409	0.929066	1	1	k__Bacteria|p__Bacteroidetes|c__Bacteroidia|o__Bacteroidales|f__Bacteroidaceae|g__Bacteroides|s__Bacteroides_massiliensis
C2 C3	C4	29.1803	25.2874	610	174	178	44	0.002695	0.002525	0.0940019	0.148781	0.253499	1	1.21738	0.34097	0.658058	1	k__Bacteria|p__Firmicutes|c__Bacilli|o__Lactobacillales|f__Streptococcaceae|g__Streptococcus|s__Streptococcus_sp_A12
C2 C3	C4	73.7705	78.7356	610	174	450	137	0.098415	0.09093	0.114122	0.463424	0.483124	1	0.75958	0.198518	0.498551	1	k__Bacteria|p__Firmicutes|c__Clostridia|o__Clostridiales|f__Eubacteriaceae|g__Eubacterium|s__Eubacterium_ventriosum
C2 C3	C4	90.4918	93.1034	610	174	552	162	0.87043	0.802175	0.117811	0.0364685	0.102644	1	0.704981	0.365541	0.68161	1	k__Bacteria|p__Firmicutes|c__Clostridia|o__Clostridiales|f__Lachnospiraceae|g__Blautia|s__Ruminococcus_torques
C2 C3	C4	44.918	39.6552	610	174	274	69	0.009105	0.00831	0.131811	0.10853	0.213615	1	1.24094	0.226233	0.539959	1	k__Bacteria|p__Firmicutes|c__Negativicutes|o__Veillonellales|f__Veillonellaceae|g__Veillonella|s__Veillonella_dispar
C2 C3	C4	90.4918	94.2529	610	174	552	164	0.046025	0.041895	0.13564	0.483875	0.492817	1	0.58032	0.129123	0.395339	1	k__Bacteria|p__Actinobacteria|c__Coriobacteriia|o__Eggerthellales|f__Eggerthellaceae|g__Adlercreutzia|s__Adlercreutzia_equolifaciens
C2 C3	C4	26.7213	20.6897	610	174	163	36	0.01003	0.009125	0.136425	0.0440712	0.117523	1	1.39784	0.114684	0.376711	1	k__Bacteria|p__Firmicutes|c__Clostridia|o__Clostridiales|f__Lachnospiraceae|g__Lachnoclostridium|s__Clostridium_saccharolyticum
C2 C3	C4	37.7049	24.7126	610	174	230	43	0.003915	0.00354	0.145263	0.000897425	0.00619866	0.445123	1.84394	0.00154983	0.028471	0.768716	k__Bacteria|p__Firmicutes|c__Negativicutes|o__Veillonellales|f__Veillonellaceae|g__Veillonella|s__Veillonella_infantium
C2 C3	C4	96.2295	96.5517	610	174	587	168	0.26016	0.234575	0.14935	0.0548171	0.131349	1	0.911491	1	1	1	k__Bacteria|p__Firmicutes|c__Clostridia|o__Clostridiales|f__Ruminococcaceae|g__Gemmiger|s__Gemmiger_formicilis
C2 C3	C4	90.9836	93.1034	610	174	555	162	0.07146	0.06399	0.159289	0.47125	0.485946	1	0.747475	0.443737	0.750529	1	k__Bacteria|p__Actinobacteria|c__Coriobacteriia|o__Eggerthellales|f__Eggerthellaceae|g__Asaccharobacter|s__Asaccharobacter_celatus
C2 C3	C4	52.623	45.977	610	174	321	80	0.00364	0.00324	0.167945	0.0786508	0.168918	1	1.3051	0.143759	0.401545	1	k__Bacteria|p__Firmicutes|c__Clostridia|o__Clostridiales|f__Oscillospiraceae|g__Oscillibacter|s__Oscillibacter_sp_PC13
C2 C3	C4	68.5246	69.5402	610	174	418	121	0.015695	0.01386	0.179378	0.322408	0.403824	1	0.953598	0.853063	0.986169	1	k__Bacteria|p__Proteobacteria|c__Proteobacteria_unclassified|o__Proteobacteria_unclassified|f__Proteobacteria_unclassified|g__Proteobacteria_unclassified|s__Proteobacteria_bacterium_CAG_139
C2 C3	C4	72.7869	70.1149	610	174	444	122	2.53174	2.18841	0.210243	0.168024	0.272353	1	1.14004	0.502595	0.806803	1	k__Bacteria|p__Bacteroidetes|c__Bacteroidia|o__Bacteroidales|f__Bacteroidaceae|g__Bacteroides|s__Bacteroides_dorei
C2 C3	C4	78.5246	79.3103	610	174	479	138	0.07607	0.064375	0.240827	0.44608	0.474952	1	0.953867	0.91644	1	1	k__Bacteria|p__Proteobacteria|c__Betaproteobacteria|o__Burkholderiales|f__Sutterellaceae|g__Parasutterella|s__Parasutterella_excrementihominis
C2 C3	C4	99.8361	100	610	174	609	174	7.60472	6.42009	0.2443	0.000655755	0.00478315	0.325254	0	1	1	1	k__Bacteria|p__Firmicutes|c__Clostridia|o__Clostridiales|f__Ruminococcaceae|g__Faecalibacterium|s__Faecalibacterium_prausnitzii
C2 C3	C4	25.4098	34.4828	610	174	155	60	0.00435	0.00362	0.265026	0.0128146	0.0504447	1	0.647253	0.0207543	0.142974	1	k__Bacteria|p__Firmicutes|c__Clostridia|o__Clostridiales|f__Clostridiaceae|g__Clostridium|s__Clostridium_bolteae_CAG_59
C2 C3	C4	99.6721	100	610	174	608	174	0.99397	0.819695	0.278115	0.0111622	0.0469872	1	0	1	1	1	k__Bacteria|p__Firmicutes|c__Clostridia|o__Clostridiales|f__Lachnospiraceae|g__Anaerostipes|s__Anaerostipes_hadrus
C2 C3	C4	28.1967	24.7126	610	174	172	43	0.41159	0.3362	0.291888	0.155751	0.261872	1	1.19635	0.387196	0.702288	1	k__Bacteria|p__Bacteroidetes|c__Bacteroidia|o__Bacteroidales|f__Bacteroidaceae|g__Bacteroides|s__Bacteroides_salyersiae
C2 C3	C4	33.6066	32.7586	610	174	205	57	0.1239	0.10112	0.293108	0.362538	0.432767	1	1.03899	0.855925	0.986169	1	k__Bacteria|p__Actinobacteria|c__Coriobacteriia|o__Eggerthellales|f__Eggerthellaceae|g__Slackia|s__Slackia_isoflavoniconvertens
C2 C3	C4	28.1967	28.7356	610	174	172	50	0.252785	0.20349	0.312953	0.478389	0.491442	1	0.973881	0.92406	1	1	k__Bacteria|p__Bacteroidetes|c__Bacteroidia|o__Bacteroidales|f__Bacteroidaceae|g__Bacteroides|s__Bacteroides_finegoldii
C2 C3	C4	28.6885	44.8276	610	174	175	78	0.04873	0.039185	0.314509	0.000139439	0.00160841	0.0691618	0.495137	0.000103721	0.00734938	0.0514457	k__Bacteria|p__Firmicutes|c__Firmicutes_unclassified|o__Firmicutes_unclassified|f__Firmicutes_unclassified|g__Firmicutes_unclassified|s__Firmicutes_bacterium_CAG_170
C2 C3	C4	37.7049	27.0115	610	174	230	47	0.0083	0.00667	0.315425	0.0058582	0.0290566	1	1.6355	0.00918166	0.0851009	1	k__Bacteria|p__Firmicutes|c__Negativicutes|o__Veillonellales|f__Veillonellaceae|g__Veillonella|s__Veillonella_atypica
C2 C3	C4	97.8689	98.8506	610	174	597	172	3.29632	2.6438	0.318243	0.000921567	0.00626161	0.457097	0.533989	0.541574	0.82399	1	k__Bacteria|p__Firmicutes|c__Clostridia|o__Clostridiales|f__Lachnospiraceae|g__Fusicatenibacter|s__Fusicatenibacter_saccharivorans
C2 C3	C4	97.541	98.8506	610	174	595	172	0.28707	0.230115	0.319048	5.1223e-06	0.000120984	0.00254066	0.46124	0.387957	0.702288	1	k__Bacteria|p__Firmicutes|c__Clostridia|o__Clostridiales|f__Lachnospiraceae|g__Dorea|s__Dorea_formicigenerans
C2 C3	C4	91.9672	92.5287	610	174	561	161	0.84142	0.67421	0.319628	0.000655673	0.00478315	0.325214	0.924452	0.874828	0.999803	1	k__Bacteria|p__Firmicutes|c__Clostridia|o__Clostridiales|f__Lachnospiraceae|g__Coprococcus|s__Coprococcus_comes
C2 C3	C4	99.0164	98.2759	610	174	604	171	0.99328	0.79283	0.325189	0.000292886	0.00284307	0.145271	1.76608	0.42385	0.735068	1	k__Bacteria|p__Firmicutes|c__Clostridia|o__Clostridiales|f__Eubacteriaceae|g__Eubacterium|s__Eubacterium_hallii
C2 C3	C4	26.5574	27.5862	610	174	162	48	0.66771	0.5238	0.350206	0.415089	0.463733	1	0.949219	0.771972	0.960515	1	k__Bacteria|p__Actinobacteria|c__Actinobacteria|o__Bifidobacteriales|f__Bifidobacteriaceae|g__Bifidobacterium|s__Bifidobacterium_bifidum
C2 C3	C4	30.9836	34.4828	610	174	189	60	0.00671	0.005255	0.352622	0.218797	0.322713	1	0.852969	0.40638	0.722453	1	k__Bacteria|p__Firmicutes|c__Clostridia|o__Clostridiales|f__Lachnospiraceae|g__Eisenbergiella|s__Eisenbergiella_massiliensis
C2 C3	C4	46.7213	44.2529	610	174	285	77	0.44044	0.34482	0.353102	0.111423	0.215558	1	1.1047	0.605275	0.855317	1	k__Bacteria|p__Firmicutes|c__Negativicutes|o__Acidaminococcales|f__Acidaminococcaceae|g__Phascolarctobacterium|s__Phascolarctobacterium_faecium
C2 C3	C4	54.918	41.3793	610	174	335	72	0.01202	0.009245	0.378692	0.000244576	0.00247571	0.12131	1.72576	0.00191867	0.031722	0.951661	k__Bacteria|p__Proteobacteria|c__Gammaproteobacteria|o__Pasteurellales|f__Pasteurellaceae|g__Haemophilus|s__Haemophilus_parainfluenzae
C2 C3	C4	84.4262	85.0575	610	174	515	148	0.02418	0.018575	0.380452	0.0022441	0.0132509	1	0.952347	0.905619	1	1	k__Bacteria|p__Firmicutes|c__Clostridia|o__Clostridiales|f__Lachnospiraceae|g__Roseburia|s__Roseburia_sp_CAG_471
C2 C3	C4	69.3443	62.6437	610	174	423	109	0.05057	0.03811	0.408112	0.00612389	0.0296391	1	1.34892	0.0984128	0.34619	1	k__Bacteria|p__Firmicutes|c__Bacilli|o__Lactobacillales|f__Lactobacillaceae|g__Lactobacillus|s__Lactobacillus_rogosae
C2 C3	C4	95.9016	94.2529	610	174	585	164	0.1287	0.09674	0.411828	0.10102	0.202859	1	1.42683	0.403862	0.720559	1	k__Bacteria|p__Firmicutes|c__Clostridia|o__Clostridiales|f__Lachnospiraceae|g__Roseburia|s__Roseburia_hominis
C2 C3	C4	36.5574	43.1034	610	174	223	75	0.12095	0.08982	0.429302	0.0898976	0.185266	1	0.76062	0.13224	0.399928	1	k__Bacteria|p__Firmicutes|c__Clostridia|o__Clostridiales|f__Clostridiaceae|g__Clostridium|s__Clostridium_sp_CAG_167
C2 C3	C4	45.4098	39.0805	610	174	277	68	0.02849	0.02027	0.49111	0.0328932	0.0959707	1	1.29668	0.142121	0.401527	1	k__Bacteria|p__Firmicutes|c__Erysipelotrichia|o__Erysipelotrichales|f__Erysipelotrichaceae|g__Erysipelatoclostridium|s__Clostridium_spiroforme
C2 C3	C4	79.1803	77.5862	610	174	483	135	0.15769	0.11103	0.506142	0.0456051	0.119053	1	1.09869	0.6742	0.911181	1	k__Bacteria|p__Bacteroidetes|c__Bacteroidia|o__Bacteroidales|f__Bacteroidaceae|g__Bacteroides|s__Bacteroides_xylanisolvens
C2 C3	C4	36.2295	35.0575	610	174	221	61	0.00589	0.00413	0.512126	0.290036	0.379572	1	1.05243	0.789059	0.960515	1	k__Bacteria|p__Proteobacteria|c__Gammaproteobacteria|o__Pasteurellales|f__Pasteurellaceae|g__Haemophilus|s__Haemophilus_sp_HMSC71H05
C2 C3	C4	66.2295	64.3678	610	174	404	112	0.00875	0.005905	0.567346	0.18599	0.292861	1	1.08564	0.651466	0.892616	1	k__Bacteria|p__Firmicutes|c__Clostridia|o__Clostridiales|f__Lachnospiraceae|g__Lachnoclostridium|s__Clostridium_citroniae
C2 C3	C4	55.9016	55.7471	610	174	341	97	0.01022	0.00683	0.581438	0.279507	0.370274	1	1.00629	1	1	1	k__Bacteria|p__Proteobacteria|c__Betaproteobacteria|o__Burkholderiales|f__Sutterellaceae|g__Turicimonas|s__Turicimonas_muris
C2 C3	C4	74.7541	68.9655	610	174	456	120	1.31618	0.81145	0.697783	0.00232364	0.0135591	1	1.33247	0.144103	0.401545	1	k__Bacteria|p__Firmicutes|c__Clostridia|o__Clostridiales|f__Lachnospiraceae|g__Lachnospira|s__Lachnospira_pectinoschiza
C2 C3	C4	35.7377	36.7816	610	174	218	64	0.371975	0.223715	0.733544	0.437931	0.473507	1	0.955835	0.857908	0.986169	1	k__Bacteria|p__Firmicutes|c__Erysipelotrichia|o__Erysipelotrichales|f__Erysipelotrichaceae|g__Holdemanella|s__Holdemanella_biformis
C2 C3	C4	98.3607	97.7011	610	174	600	170	0.44339	0.26477	0.743837	9.18305e-08	4.14072e-06	4.55479e-05	1.41176	0.524954	0.814243	1	k__Bacteria|p__Firmicutes|c__Clostridia|o__Clostridiales|f__Ruminococcaceae|g__Agathobaculum|s__Agathobaculum_butyriciproducens
C2 C3	C4	32.623	31.6092	610	174	199	55	0.27713	0.16476	0.750197	0.197018	0.303463	1	1.0476	0.854449	0.986169	1	k__Bacteria|p__Firmicutes|c__Clostridia|o__Clostridiales|f__Eubacteriaceae|g__Eubacterium|s__Eubacterium_sp_CAG_274
C2 C3	C4	33.6066	30.4598	610	174	205	53	0.01038	0.00616	0.752804	0.122904	0.228532	1	1.1556	0.465175	0.766346	1	k__Bacteria|p__Proteobacteria|c__Betaproteobacteria|o__Burkholderiales|f__Sutterellaceae|g__Sutterella|s__Sutterella_parvirubra
C2 C3	C4	79.3443	79.3103	610	174	484	138	0.148845	0.081635	0.866551	0.0447532	0.11839	1	1.00207	1	1	1	k__Bacteria|p__Firmicutes|c__Clostridia|o__Clostridiales|f__Eubacteriaceae|g__Eubacterium|s__Eubacterium_sp_CAG_38
C2 C3	C4	28.0328	29.8851	610	174	171	52	0.42617	0.22818	0.901257	0.409957	0.463186	1	0.913878	0.634828	0.877088	1	k__Bacteria|p__Bacteroidetes|c__Bacteroidia|o__Bacteroidales|f__Prevotellaceae|g__Paraprevotella|s__Paraprevotella_xylaniphila
C2 C3	C4	37.377	37.931	610	174	228	66	0.05509	0.028805	0.935471	0.353114	0.429252	1	0.976678	0.929326	1	1	k__Bacteria|p__Firmicutes|c__Clostridia|o__Clostridiales|f__Lachnospiraceae|g__Roseburia|s__Roseburia_sp_CAG_182
C2 C3	C4	87.0492	89.0805	610	174	531	155	0.14604	0.07517	0.958135	8.52239e-08	4.14072e-06	4.22711e-05	0.823928	0.518287	0.813514	1	k__Bacteria|p__Firmicutes|c__Clostridia|o__Clostridiales|f__Eubacteriaceae|g__Eubacterium|s__Eubacterium_ramulus
C2 C3	C4	22.623	31.6092	610	174	138	55	0.1013	0.05207	0.96011	0.0206923	0.0712734	1	0.632589	0.0168402	0.124259	1	k__Bacteria|p__Firmicutes|c__Clostridia|o__Clostridiales|f__Clostridiaceae|g__Clostridium|s__Clostridium_sp_CAG_253
C2 C3	C4	99.8361	99.4253	610	174	609	173	0.55378	0.2705	1.03368	1.20069e-11	1.48885e-09	5.9554e-09	3.52023	0.394841	0.71215	1	k__Bacteria|p__Firmicutes|c__Clostridia|o__Clostridiales|f__Lachnospiraceae|g__Blautia|s__Blautia_wexlerae
C2 C3	C4	95.5738	93.6782	610	174	583	163	0.34661	0.16231	1.09456	9.24302e-07	2.55378e-05	0.000458454	1.45717	0.31784	0.651441	1	k__Bacteria|p__Firmicutes|c__Clostridia|o__Clostridiales|f__Lachnospiraceae|g__Roseburia|s__Roseburia_inulinivorans
C2 C3	C4	20.1639	22.9885	610	174	123	40	0.19318	0.089525	1.10958	0.221849	0.322713	1	0.846099	0.458477	0.76108	1	k__Bacteria|p__Bacteroidetes|c__Bacteroidia|o__Bacteroidales|f__Bacteroidaceae|g__Bacteroides|s__Bacteroides_faecis_CAG_32
C2 C3	C4	27.541	28.7356	610	174	168	50	0.04578	0.021065	1.11987	0.485913	0.493879	1	0.942624	0.77387	0.960515	1	k__Bacteria|p__Bacteroidetes|c__Bacteroidia|o__Bacteroidales|f__Prevotellaceae|g__Paraprevotella|s__Paraprevotella_clara
C2 C3	C4	29.0164	22.4138	610	174	177	39	0.19558	0.08865	1.14157	0.0258477	0.0837938	1	1.41499	0.10173	0.351151	1	k__Bacteria|p__Actinobacteria|c__Actinobacteria|o__Bifidobacteriales|f__Bifidobacteriaceae|g__Bifidobacterium|s__Bifidobacterium_pseudocatenulatum
C2 C3	C4	95.082	95.977	610	174	580	167	2.10259	0.93123	1.17496	1.08235e-06	2.82551e-05	0.000536848	0.810379	0.839248	0.981762	1	k__Bacteria|p__Firmicutes|c__Clostridia|o__Clostridiales|f__Lachnospiraceae|g__Lachnospiraceae_unclassified|s__Eubacterium_rectale
C2 C3	C4	50	45.4023	610	174	305	79	0.04619	0.02004	1.2047	0.0518404	0.128564	1	1.20253	0.302832	0.64341	1	k__Bacteria|p__Bacteroidetes|c__Bacteroidia|o__Bacteroidales|f__Bacteroidaceae|g__Bacteroides|s__Bacteroides_galacturonicus
C2 C3	C4	79.6721	83.908	610	174	486	146	1.39994	0.571035	1.29372	0.00386773	0.0213155	1	0.751657	0.232842	0.542204	1	k__Bacteria|p__Firmicutes|c__Clostridia|o__Clostridiales|f__Lachnospiraceae|g__Roseburia|s__Roseburia_faecis
C2 C3	C4	79.0164	80.4598	610	174	482	140	0.33165	0.113915	1.5417	0.000298063	0.00284307	0.147839	0.914509	0.750425	0.960515	1	k__Bacteria|p__Firmicutes|c__Clostridia|o__Clostridiales|f__Lachnospiraceae|g__Roseburia|s__Roseburia_intestinalis
C2 C3	C4	33.6066	33.3333	610	174	205	58	15.6562	1.30902	3.58018	0.0616925	0.144337	1	1.01235	1	1	1	k__Bacteria|p__Bacteroidetes|c__Bacteroidia|o__Bacteroidales|f__Prevotellaceae|g__Prevotella|s__Prevotella_copri

## Sheet: Bristol species types 12 vs. 56
Class 1	Class2	Class 1 prevalence (%)	Class 2 prevalence (%)	Class 1 total	Class 2 total	Class 1 positives	Class 2 positives	Class 1 median relative abundance	Class 2 median relative abundance	Effect size	pvalue MWU	pvalue MWU FDR	pvalue MWU Bonferroni	oddsratio Fisher	pvalue F	pvalue F FDR	pvalue F Bonferroni	Taxonomy
B12	B56	32	44.8276	75	116	24	52	0.82651	27.1272	-5.03657	0.0079433	0.0379009	1	0.579186	0.0959579	0.439198	1	k__Bacteria|p__Bacteroidetes|c__Bacteroidia|o__Bacteroidales|f__Prevotellaceae|g__Prevotella|s__Prevotella_copri
B12	B56	81.3333	75.8621	75	116	61	88	0.30397	2.28473	-2.91003	0.00138399	0.0128403	0.231126	1.38636	0.474645	0.822761	1	k__Bacteria|p__Firmicutes|c__Clostridia|o__Clostridiales|f__Lachnospiraceae|g__Roseburia|s__Roseburia_faecis
B12	B56	25.3333	31.0345	75	116	19	36	0.00364	0.013365	-1.87645	0.112097	0.225545	1	0.753968	0.418228	0.814414	1	k__Bacteria|p__Firmicutes|c__Bacilli|o__Lactobacillales|f__Streptococcaceae|g__Lactococcus|s__Lactococcus_lactis
B12	B56	28	49.1379	75	116	21	57	0.003	0.01046	-1.80185	0.00105362	0.0109972	0.175955	0.402534	0.00422191	0.0921333	0.705059	k__Bacteria|p__Firmicutes|c__Negativicutes|o__Veillonellales|f__Veillonellaceae|g__Veillonella|s__Veillonella_atypica
B12	B56	28	22.4138	75	116	21	26	0.05216	0.18029	-1.7893	0.244107	0.316014	1	1.34615	0.394658	0.814414	1	k__Bacteria|p__Firmicutes|c__Clostridia|o__Clostridiales|f__Clostridiaceae|g__Clostridium|s__Clostridium_sp_CAG_253
B12	B56	76	75	75	116	57	87	0.10288	0.34439	-1.74308	0.0305498	0.0893098	1	1.05556	1	1	1	k__Bacteria|p__Firmicutes|c__Clostridia|o__Clostridiales|f__Lachnospiraceae|g__Roseburia|s__Roseburia_intestinalis
B12	B56	22.6667	40.5172	75	116	17	47	0.00975	0.0303	-1.63584	0.00159404	0.0137318	0.266204	0.430301	0.0121475	0.202863	1	k__Bacteria|p__Bacteroidetes|c__Bacteroidia|o__Bacteroidales|f__Prevotellaceae|g__Paraprevotella|s__Paraprevotella_clara
B12	B56	22.6667	41.3793	75	116	17	48	0.15284	0.443605	-1.53725	0.000927621	0.0109972	0.154913	0.41523	0.00814243	0.151087	1	k__Bacteria|p__Bacteroidetes|c__Bacteroidia|o__Bacteroidales|f__Prevotellaceae|g__Paraprevotella|s__Paraprevotella_xylaniphila
B12	B56	97.3333	94.8276	75	116	73	110	0.89853	2.27231	-1.33852	0.00913567	0.0423793	1	1.99091	0.484126	0.822761	1	k__Bacteria|p__Firmicutes|c__Clostridia|o__Clostridiales|f__Lachnospiraceae|g__Lachnospiraceae_unclassified|s__Eubacterium_rectale
B12	B56	100	99.1379	75	116	75	115	0.19986	0.49696	-1.31414	9.23141e-07	3.85411e-05	0.000154165	inf	1	1	1	k__Bacteria|p__Firmicutes|c__Clostridia|o__Clostridiales|f__Ruminococcaceae|g__Agathobaculum|s__Agathobaculum_butyriciproducens
B12	B56	29.3333	44.8276	75	116	22	52	0.002265	0.00557	-1.29817	0.00973434	0.0437102	1	0.510885	0.0343832	0.291101	1	k__Bacteria|p__Firmicutes|c__Negativicutes|o__Veillonellales|f__Veillonellaceae|g__Veillonella|s__Veillonella_infantium
B12	B56	20	31.0345	75	116	15	36	0.12474	0.274805	-1.13948	0.0424476	0.110259	1	0.555556	0.0976121	0.439198	1	k__Bacteria|p__Bacteroidetes|c__Bacteroidia|o__Bacteroidales|f__Bacteroidaceae|g__Bacteroides|s__Bacteroides_finegoldii
B12	B56	96	97.4138	75	116	72	113	0.191225	0.40213	-1.07239	0.000938059	0.0109972	0.156656	0.637168	0.681021	0.917181	1	k__Bacteria|p__Firmicutes|c__Clostridia|o__Clostridiales|f__Lachnospiraceae|g__Roseburia|s__Roseburia_inulinivorans
B12	B56	48	25.8621	75	116	36	30	0.00385	0.00806	-1.06592	0.00247492	0.0137676	0.413312	2.64615	0.0019404	0.0648095	0.324048	k__Bacteria|p__Firmicutes|c__Clostridia|o__Clostridiales|f__Lachnospiraceae|g__Eisenbergiella|s__Eisenbergiella_massiliensis
B12	B56	33.3333	36.2069	75	116	25	42	0.00527	0.01083	-1.03916	0.179232	0.265077	1	0.880952	0.756896	0.945442	1	k__Bacteria|p__Proteobacteria|c__Betaproteobacteria|o__Burkholderiales|f__Sutterellaceae|g__Sutterella|s__Sutterella_parvirubra
B12	B56	58.6667	48.2759	75	116	44	56	0.019045	0.037575	-0.980361	0.272748	0.343664	1	1.52074	0.183097	0.611482	1	k__Bacteria|p__Bacteroidetes|c__Bacteroidia|o__Bacteroidales|f__Bacteroidaceae|g__Bacteroides|s__Bacteroides_galacturonicus
B12	B56	44	61.2069	75	116	33	71	0.00837	0.01576	-0.912968	0.00103002	0.0109972	0.172013	0.497988	0.0255273	0.275667	1	k__Bacteria|p__Proteobacteria|c__Gammaproteobacteria|o__Pasteurellales|f__Pasteurellaceae|g__Haemophilus|s__Haemophilus_parainfluenzae
B12	B56	92	91.3793	75	116	69	106	0.07387	0.13823	-0.90401	0.0537011	0.128115	1	1.08491	1	1	1	k__Bacteria|p__Firmicutes|c__Clostridia|o__Clostridiales|f__Lachnospiraceae|g__Roseburia|s__Roseburia_hominis
B12	B56	33.3333	39.6552	75	116	25	46	0.22705	0.417085	-0.877331	0.156454	0.256329	1	0.76087	0.443937	0.814414	1	k__Bacteria|p__Firmicutes|c__Erysipelotrichia|o__Erysipelotrichales|f__Erysipelotrichaceae|g__Holdemanella|s__Holdemanella_biformis
B12	B56	20	29.3103	75	116	15	34	0.00184	0.00321	-0.802868	0.0659215	0.150807	1	0.602941	0.176274	0.600771	1	k__Bacteria|p__Firmicutes|c__Negativicutes|o__Veillonellales|f__Veillonellaceae|g__Veillonella|s__Veillonella_sp_T11011_6
B12	B56	20	25	75	116	15	29	0.14143	0.2452	-0.793871	0.180402	0.265077	1	0.75	0.48379	0.822761	1	k__Bacteria|p__Actinobacteria|c__Actinobacteria|o__Bifidobacteriales|f__Bifidobacteriaceae|g__Bifidobacterium|s__Bifidobacterium_catenulatum
B12	B56	100	99.1379	75	116	75	115	0.35525	0.60152	-0.759778	0.00294369	0.0148968	0.491596	inf	1	1	1	k__Bacteria|p__Firmicutes|c__Clostridia|o__Clostridiales|f__Lachnospiraceae|g__Blautia|s__Blautia_wexlerae
B12	B56	28	34.4828	75	116	21	40	0.12986	0.21395	-0.720317	0.153403	0.256329	1	0.738889	0.42717	0.814414	1	k__Bacteria|p__Bacteroidetes|c__Bacteroidia|o__Bacteroidales|f__Bacteroidaceae|g__Bacteroides|s__Bacteroides_clarus
B12	B56	98.6667	96.5517	75	116	74	112	0.57292	0.940175	-0.714596	0.0104695	0.0437102	1	2.64286	0.64997	0.888604	1	k__Bacteria|p__Firmicutes|c__Clostridia|o__Clostridiales|f__Eubacteriaceae|g__Eubacterium|s__Eubacterium_hallii
B12	B56	30.6667	20.6897	75	116	23	24	0.89569	1.4321	-0.677061	0.0429152	0.110259	1	1.69551	0.12534	0.503416	1	k__Bacteria|p__Bacteroidetes|c__Bacteroidia|o__Bacteroidales|f__Bacteroidaceae|g__Bacteroides|s__Bacteroides_eggerthii
B12	B56	84	84.4828	75	116	63	98	0.01505	0.023735	-0.657253	0.0262555	0.0816192	1	0.964286	1	1	1	k__Bacteria|p__Firmicutes|c__Clostridia|o__Clostridiales|f__Lachnospiraceae|g__Roseburia|s__Roseburia_sp_CAG_471
B12	B56	42.6667	37.931	75	116	32	44	0.118025	0.17842	-0.596185	0.283855	0.347155	1	1.21776	0.546967	0.823689	1	k__Bacteria|p__Actinobacteria|c__Actinobacteria|o__Bifidobacteriales|f__Bifidobacteriaceae|g__Bifidobacterium|s__Bifidobacterium_animalis
B12	B56	34.6667	37.931	75	116	26	44	0.58356	0.858955	-0.557702	0.233363	0.307258	1	0.868275	0.758618	0.945442	1	k__Bacteria|p__Bacteroidetes|c__Bacteroidia|o__Bacteroidales|f__Bacteroidaceae|g__Bacteroides|s__Bacteroides_massiliensis
B12	B56	32	38.7931	75	116	24	45	0.06718	0.09779	-0.541655	0.118732	0.233274	1	0.742484	0.358984	0.799337	1	k__Bacteria|p__Firmicutes|c__Clostridia|o__Clostridiales|f__Clostridiaceae|g__Clostridium|s__Clostridium_sp_CAG_167
B12	B56	42.6667	56.8966	75	116	32	66	0.012025	0.017455	-0.537603	0.0218135	0.0758929	1	0.563777	0.0749778	0.403913	1	k__Bacteria|p__Firmicutes|c__Negativicutes|o__Veillonellales|f__Veillonellaceae|g__Veillonella|s__Veillonella_parvula
B12	B56	24	36.2069	75	116	18	42	0.0019	0.0027	-0.50696	0.0310178	0.0893098	1	0.556391	0.0815889	0.425792	1	k__Bacteria|p__Actinobacteria|c__Actinobacteria|o__Actinomycetales|f__Actinomycetaceae|g__Actinomyces|s__Actinomyces_sp_ICM47
B12	B56	41.3333	33.6207	75	116	31	39	0.00481	0.0067	-0.478124	0.17231	0.262003	1	1.39103	0.286746	0.760104	1	k__Bacteria|p__Firmicutes|c__Clostridia|o__Clostridiales|f__Lachnospiraceae|g__Lachnoclostridium|s__Clostridium_asparagiforme
B12	B56	42.6667	55.1724	75	116	32	64	0.00615	0.008435	-0.455802	0.0527732	0.127726	1	0.604651	0.104233	0.439198	1	k__Bacteria|p__Proteobacteria|c__Betaproteobacteria|o__Burkholderiales|f__Sutterellaceae|g__Turicimonas|s__Turicimonas_muris
B12	B56	52	35.3448	75	116	39	41	0.03409	0.04642	-0.445398	0.0125207	0.050999	1	1.98171	0.0251342	0.275667	1	k__Bacteria|p__Bacteroidetes|c__Bacteroidia|o__Bacteroidales|f__Rikenellaceae|g__Alistipes|s__Alistipes_onderdonkii
B12	B56	100	98.2759	75	116	75	114	5.69602	7.60813	-0.417589	0.0103959	0.0437102	1	inf	0.520529	0.822761	1	k__Bacteria|p__Firmicutes|c__Clostridia|o__Clostridiales|f__Ruminococcaceae|g__Faecalibacterium|s__Faecalibacterium_prausnitzii
B12	B56	84	84.4828	75	116	63	98	0.10819	0.142725	-0.399671	0.127425	0.235478	1	0.964286	1	1	1	k__Bacteria|p__Firmicutes|c__Clostridia|o__Clostridiales|f__Eubacteriaceae|g__Eubacterium|s__Eubacterium_ramulus
B12	B56	32	38.7931	75	116	24	45	0.00468	0.00611	-0.384664	0.130243	0.235478	1	0.742484	0.358984	0.799337	1	k__Bacteria|p__Proteobacteria|c__Gammaproteobacteria|o__Pasteurellales|f__Pasteurellaceae|g__Haemophilus|s__Haemophilus_sp_HMSC71H05
B12	B56	21.3333	34.4828	75	116	16	40	0.24013	0.306865	-0.353788	0.0190197	0.0690497	1	0.515254	0.0533101	0.307485	1	k__Bacteria|p__Firmicutes|c__Clostridia|o__Clostridiales|f__Eubacteriaceae|g__Eubacterium|s__Eubacterium_sp_CAG_274
B12	B56	64	65.5172	75	116	48	76	0.494465	0.6218	-0.330582	0.318228	0.382331	1	0.935673	0.877161	1	1	k__Bacteria|p__Firmicutes|c__Clostridia|o__Clostridiales|f__Ruminococcaceae|g__Ruminococcus|s__Ruminococcus_lactaris
B12	B56	28	22.4138	75	116	21	26	0.00553	0.00693	-0.325576	0.233663	0.307258	1	1.34615	0.394658	0.814414	1	k__Bacteria|p__Bacteroidetes|c__Bacteroidia|o__Bacteroidales|f__Bacteroidaceae|g__Bacteroides|s__Bacteroides_nordii
B12	B56	90.6667	88.7931	75	116	68	103	0.64649	0.80808	-0.32187	0.182348	0.265077	1	1.22607	0.81051	0.987994	1	k__Bacteria|p__Firmicutes|c__Clostridia|o__Clostridiales|f__Lachnospiraceae|g__Coprococcus|s__Coprococcus_comes
B12	B56	76	81.0345	75	116	57	94	0.089	0.10817	-0.281423	0.028915	0.0877963	1	0.741135	0.467386	0.822761	1	k__Bacteria|p__Firmicutes|c__Clostridia|o__Clostridiales|f__Eubacteriaceae|g__Eubacterium|s__Eubacterium_sp_CAG_38
B12	B56	22.6667	24.1379	75	116	17	28	0.52385	0.63119	-0.268921	0.351926	0.401187	1	0.921182	0.862794	1	1	k__Bacteria|p__Firmicutes|c__Clostridia|o__Clostridiales|f__Eubacteriaceae|g__Eubacterium|s__Eubacterium_sp_CAG_251
B12	B56	34.6667	49.1379	75	116	26	57	1.29644	1.55819	-0.26531	0.0246325	0.0791083	1	0.54923	0.0533956	0.307485	1	k__Bacteria|p__Bacteroidetes|c__Bacteroidia|o__Bacteroidales|f__Bacteroidaceae|g__Bacteroides|s__Bacteroides_stercoris
B12	B56	66.6667	54.3103	75	116	50	63	0.00196	0.0023	-0.23078	0.158095	0.256329	1	1.68254	0.099119	0.439198	1	k__Bacteria|p__Firmicutes|c__Clostridia|o__Clostridiales|f__Ruminococcaceae|g__Ruminococcaceae_unclassified|s__Ruminococcaceae_bacterium_D16
B12	B56	48	40.5172	75	116	36	47	0.037955	0.04365	-0.201692	0.131177	0.235478	1	1.35516	0.370064	0.802606	1	k__Bacteria|p__Firmicutes|c__Clostridia|o__Clostridiales|f__Lachnospiraceae|g__Blautia|s__Ruminococcus_gnavus
B12	B56	30.6667	45.6897	75	116	23	53	0.10318	0.114	-0.14387	0.0300885	0.0893098	1	0.525762	0.0489531	0.307485	1	k__Bacteria|p__Actinobacteria|c__Coriobacteriia|o__Eggerthellales|f__Eggerthellaceae|g__Slackia|s__Slackia_isoflavoniconvertens
B12	B56	89.3333	95.6897	75	116	67	111	0.45346	0.49951	-0.139538	0.13645	0.236749	1	0.377252	0.138665	0.503416	1	k__Bacteria|p__Bacteroidetes|c__Bacteroidia|o__Bacteroidales|f__Bacteroidaceae|g__Bacteroides|s__Bacteroides_ovatus
B12	B56	36	39.6552	75	116	27	46	0.00251	0.002755	-0.134365	0.285285	0.347155	1	0.855978	0.649511	0.888604	1	k__Bacteria|p__Actinobacteria|c__Actinobacteria|o__Micrococcales|f__Micrococcaceae|g__Rothia|s__Rothia_mucilaginosa
B12	B56	60	62.069	75	116	45	72	0.52651	0.57361	-0.123609	0.324802	0.385164	1	0.916667	0.879208	1	1	k__Bacteria|p__Firmicutes|c__Clostridia|o__Clostridiales|f__Lachnospiraceae|g__Coprococcus|s__Coprococcus_eutactus
B12	B56	81.3333	89.6552	75	116	61	104	5.55181	6.02644	-0.118348	0.0468742	0.116836	1	0.502747	0.130351	0.503416	1	k__Bacteria|p__Bacteroidetes|c__Bacteroidia|o__Bacteroidales|f__Bacteroidaceae|g__Bacteroides|s__Bacteroides_vulgatus
B12	B56	100	99.1379	75	116	75	115	0.92942	1.00885	-0.118309	0.217312	0.300639	1	inf	1	1	1	k__Bacteria|p__Firmicutes|c__Clostridia|o__Clostridiales|f__Lachnospiraceae|g__Anaerostipes|s__Anaerostipes_hadrus
B12	B56	32	20.6897	75	116	24	24	0.004395	0.00477	-0.118126	0.0412546	0.109357	1	1.80392	0.0891621	0.437943	1	k__Bacteria|p__Firmicutes|c__Clostridia|o__Clostridiales|f__Ruminococcaceae|g__Pseudoflavonifractor|s__Pseudoflavonifractor_sp_An184
B12	B56	89.3333	92.2414	75	116	67	107	0.45381	0.49151	-0.115132	0.379932	0.417425	1	0.704439	0.604221	0.877433	1	k__Bacteria|p__Firmicutes|c__Clostridia|o__Clostridiales|f__Lachnospiraceae|g__Coprococcus|s__Coprococcus_catus
B12	B56	50.6667	29.3103	75	116	38	34	0.02883	0.03078	-0.0944224	0.00187692	0.0137318	0.313445	2.47695	0.00367914	0.0921333	0.614416	k__Bacteria|p__Firmicutes|c__Clostridia|o__Clostridiales|f__Lachnospiraceae|g__Roseburia|s__Roseburia_sp_CAG_309
B12	B56	42.6667	33.6207	75	116	32	39	0.316745	0.33639	-0.086813	0.124484	0.235478	1	1.46929	0.222792	0.657843	1	k__Bacteria|p__Firmicutes|c__Negativicutes|o__Veillonellales|f__Veillonellaceae|g__Dialister|s__Dialister_invisus
B12	B56	20	20.6897	75	116	15	24	0.14607	0.155045	-0.0860271	0.49165	0.49761	1	0.958333	1	1	1	k__Bacteria|p__Firmicutes|c__Clostridia|o__Clostridiales|f__Eubacteriaceae|g__Eubacterium|s__Eubacterium_sp_OM08_24
B12	B56	98.6667	96.5517	75	116	74	112	0.27591	0.291215	-0.0778869	0.218099	0.300639	1	2.64286	0.64997	0.888604	1	k__Bacteria|p__Firmicutes|c__Clostridia|o__Clostridiales|f__Lachnospiraceae|g__Dorea|s__Dorea_formicigenerans
B12	B56	90.6667	91.3793	75	116	68	106	0.016035	0.016915	-0.0770788	0.357187	0.401187	1	0.916442	1	1	1	k__Bacteria|p__Actinobacteria|c__Coriobacteriia|o__Coriobacteriales|f__Coriobacteriaceae|g__Collinsella|s__Collinsella_stercoris
B12	B56	70.6667	72.4138	75	116	53	84	1.12532	1.17912	-0.0673752	0.464895	0.479243	1	0.917749	0.869611	1	1	k__Bacteria|p__Firmicutes|c__Clostridia|o__Clostridiales|f__Lachnospiraceae|g__Lachnospira|s__Lachnospira_pectinoschiza
B12	B56	73.3333	62.931	75	116	55	73	0.00173	0.00181	-0.0652177	0.096679	0.201817	1	1.61986	0.157362	0.54749	1	k__Bacteria|p__Actinobacteria|c__Coriobacteriia|o__Eggerthellales|f__Eggerthellaceae|g__Enterorhabdus|s__Enterorhabdus_caecimuris
B12	B56	98.6667	94.8276	75	116	74	110	0.236765	0.24685	-0.0601788	0.206437	0.292161	1	4.03636	0.248823	0.681203	1	k__Bacteria|p__Firmicutes|c__Clostridia|o__Clostridiales|f__Ruminococcaceae|g__Gemmiger|s__Gemmiger_formicilis
B12	B56	92	87.931	75	116	69	102	0.85546	0.89174	-0.0599227	0.435555	0.460365	1	1.57843	0.470949	0.822761	1	k__Bacteria|p__Firmicutes|c__Clostridia|o__Clostridiales|f__Lachnospiraceae|g__Blautia|s__Ruminococcus_torques
B12	B56	37.3333	52.5862	75	116	28	61	0.003315	0.0034	-0.0365259	0.0202108	0.0718127	1	0.537147	0.0532076	0.307485	1	k__Bacteria|p__Firmicutes|c__Clostridia|o__Clostridiales|f__Oscillospiraceae|g__Oscillibacter|s__Oscillibacter_sp_PC13
B12	B56	68	66.3793	75	116	51	77	0.01362	0.01394	-0.0335039	0.497822	0.497822	1	1.0763	0.875425	1	1	k__Bacteria|p__Proteobacteria|c__Proteobacteria_unclassified|o__Proteobacteria_unclassified|f__Proteobacteria_unclassified|g__Proteobacteria_unclassified|s__Proteobacteria_bacterium_CAG_139
B12	B56	68	78.4483	75	116	51	91	1.00424	1.0263	-0.0313484	0.151842	0.256329	1	0.583791	0.127393	0.503416	1	k__Bacteria|p__Bacteroidetes|c__Bacteroidia|o__Bacteroidales|f__Tannerellaceae|g__Parabacteroides|s__Parabacteroides_merdae
B12	B56	69.3333	77.5862	75	116	52	90	0.001735	0.001755	-0.0165354	0.220525	0.300639	1	0.65314	0.23602	0.657843	1	k__Bacteria|p__Actinobacteria|c__Coriobacteriia|o__Coriobacteriales|f__Coriobacteriaceae|g__Collinsella|s__Collinsella_intestinalis
B12	B56	77.3333	82.7586	75	116	58	96	0.697165	0.6965	0.00137679	0.276537	0.343664	1	0.710784	0.356413	0.799337	1	k__Bacteria|p__Firmicutes|c__Clostridia|o__Clostridiales|f__Ruminococcaceae|g__Ruminococcus|s__Ruminococcus_bicirculans
B12	B56	64	72.4138	75	116	48	84	1.73709	1.72636	0.00893916	0.0791716	0.17171	1	0.677249	0.262079	0.705922	1	k__Bacteria|p__Actinobacteria|c__Actinobacteria|o__Bifidobacteriales|f__Bifidobacteriaceae|g__Bifidobacterium|s__Bifidobacterium_adolescentis
B12	B56	97.3333	96.5517	75	116	73	112	3.16759	3.13383	0.0154564	0.3277	0.385164	1	1.30357	1	1	1	k__Bacteria|p__Firmicutes|c__Clostridia|o__Clostridiales|f__Lachnospiraceae|g__Fusicatenibacter|s__Fusicatenibacter_saccharivorans
B12	B56	94.6667	95.6897	75	116	71	111	0.9639	0.95319	0.0161197	0.410929	0.445618	1	0.79955	0.73976	0.945442	1	k__Bacteria|p__Firmicutes|c__Clostridia|o__Clostridiales|f__Lachnospiraceae|g__Dorea|s__Dorea_longicatena
B12	B56	41.3333	35.3448	75	116	31	41	0.06541	0.06417	0.0276122	0.241872	0.315567	1	1.2888	0.446114	0.814414	1	k__Bacteria|p__Firmicutes|c__Clostridia|o__Clostridiales|f__Lachnospiraceae|g__Roseburia|s__Roseburia_sp_CAG_182
B12	B56	74.6667	81.0345	75	116	56	94	0.10668	0.104475	0.030132	0.2282	0.307258	1	0.68981	0.367119	0.802606	1	k__Bacteria|p__Firmicutes|c__Clostridia|o__Clostridiales|f__Eubacteriaceae|g__Eubacterium|s__Eubacterium_ventriosum
B12	B56	34.6667	29.3103	75	116	26	34	0.001475	0.00143	0.0446998	0.174146	0.262003	1	1.27971	0.523399	0.822761	1	k__Bacteria|p__Actinobacteria|c__Actinobacteria|o__Actinomycetales|f__Actinomycetaceae|g__Actinomyces|s__Actinomyces_odontolyticus
B12	B56	77.3333	80.1724	75	116	58	93	0.05079	0.04912	0.0482339	0.129612	0.235478	1	0.84377	0.71644	0.945442	1	k__Bacteria|p__Proteobacteria|c__Betaproteobacteria|o__Burkholderiales|f__Sutterellaceae|g__Parasutterella|s__Parasutterella_excrementihominis
B12	B56	89.3333	91.3793	75	116	67	106	1.64619	1.59184	0.0484401	0.497326	0.497822	1	0.790094	0.623401	0.882271	1	k__Bacteria|p__Actinobacteria|c__Coriobacteriia|o__Coriobacteriales|f__Coriobacteriaceae|g__Collinsella|s__Collinsella_aerofaciens
B12	B56	90.6667	86.2069	75	116	68	100	0.07206	0.068515	0.0727788	0.164747	0.260565	1	1.55429	0.495289	0.822761	1	k__Bacteria|p__Actinobacteria|c__Coriobacteriia|o__Eggerthellales|f__Eggerthellaceae|g__Asaccharobacter|s__Asaccharobacter_celatus
B12	B56	72	71.5517	75	116	54	83	0.12099	0.11467	0.0773998	0.286871	0.347155	1	1.02238	1	1	1	k__Bacteria|p__Bacteroidetes|c__Bacteroidia|o__Bacteroidales|f__Barnesiellaceae|g__Coprobacter|s__Coprobacter_fastidiosus
B12	B56	80	75.8621	75	116	60	88	0.11235	0.105085	0.0964434	0.276122	0.343664	1	1.27273	0.595601	0.87356	1	k__Bacteria|p__Bacteroidetes|c__Bacteroidia|o__Bacteroidales|f__Bacteroidaceae|g__Bacteroides|s__Bacteroides_xylanisolvens
B12	B56	86.6667	86.2069	75	116	65	100	0.4846	0.44427	0.125358	0.182538	0.265077	1	1.04	1	1	1	k__Bacteria|p__Firmicutes|c__Clostridia|o__Clostridiales|f__Oscillospiraceae|g__Oscillibacter|s__Oscillibacter_sp_57_20
B12	B56	92	87.069	75	116	69	101	0.05064	0.04562	0.150611	0.166132	0.260565	1	1.70792	0.348791	0.799337	1	k__Bacteria|p__Actinobacteria|c__Coriobacteriia|o__Eggerthellales|f__Eggerthellaceae|g__Adlercreutzia|s__Adlercreutzia_equolifaciens
B12	B56	69.3333	66.3793	75	116	52	77	0.05873	0.05275	0.154927	0.174071	0.262003	1	1.14512	0.752262	0.945442	1	k__Bacteria|p__Bacteroidetes|c__Bacteroidia|o__Bacteroidales|f__Odoribacteraceae|g__Butyricimonas|s__Butyricimonas_synergistica
B12	B56	33.3333	56.8966	75	116	25	66	0.01196	0.010685	0.16263	0.00205193	0.0137318	0.342672	0.378788	0.00180588	0.0648095	0.301582	k__Bacteria|p__Firmicutes|c__Negativicutes|o__Veillonellales|f__Veillonellaceae|g__Veillonella|s__Veillonella_dispar
B12	B56	97.3333	96.5517	75	116	73	112	0.07038	0.062235	0.177439	0.184975	0.2663	1	1.30357	1	1	1	k__Bacteria|p__Firmicutes|c__Clostridia|o__Clostridiales|f__Clostridiales_unclassified|g__Lawsonibacter|s__Lawsonibacter_asaccharolyticus
B12	B56	81.3333	85.3448	75	116	61	99	0.75301	0.66301	0.183638	0.357945	0.401187	1	0.748196	0.547482	0.823689	1	k__Bacteria|p__Actinobacteria|c__Actinobacteria|o__Bifidobacteriales|f__Bifidobacteriaceae|g__Bifidobacterium|s__Bifidobacterium_longum
B12	B56	90.6667	90.5172	75	116	68	105	4.90862	4.2454	0.209417	0.0526628	0.127726	1	1.01769	1	1	1	k__Bacteria|p__Bacteroidetes|c__Bacteroidia|o__Bacteroidales|f__Rikenellaceae|g__Alistipes|s__Alistipes_putredinis
B12	B56	76	78.4483	75	116	57	91	0.05974	0.05012	0.253311	0.429924	0.460239	1	0.869963	0.724824	0.945442	1	k__Bacteria|p__Firmicutes|c__Clostridia|o__Clostridiales|f__Peptostreptococcaceae|g__Intestinibacter|s__Intestinibacter_bartlettii
B12	B56	98.6667	97.4138	75	116	74	113	0.713205	0.59116	0.270768	0.153582	0.256329	1	1.9646	1	1	1	k__Bacteria|p__Firmicutes|c__Clostridia|o__Clostridiales|f__Lachnospiraceae|g__Blautia|s__Blautia_obeum
B12	B56	48	41.3793	75	116	36	48	0.003075	0.002535	0.278601	0.162047	0.26021	1	1.30769	0.375342	0.803617	1	k__Bacteria|p__Firmicutes|c__Bacilli|o__Lactobacillales|f__Streptococcaceae|g__Streptococcus|s__Streptococcus_mitis
B12	B56	86.6667	91.3793	75	116	65	106	0.10909	0.08976	0.281374	0.491442	0.49761	1	0.613208	0.337837	0.799337	1	k__Bacteria|p__Firmicutes|c__Firmicutes_unclassified|o__Firmicutes_unclassified|f__Firmicutes_unclassified|g__Firmicutes_unclassified|s__Firmicutes_bacterium_CAG_83
B12	B56	52	52.5862	75	116	39	61	0.01746	0.01411	0.307336	0.362978	0.403743	1	0.976776	1	1	1	k__Bacteria|p__Firmicutes|c__Firmicutes_unclassified|o__Firmicutes_unclassified|f__Firmicutes_unclassified|g__Firmicutes_unclassified|s__Firmicutes_bacterium_CAG_95
B12	B56	78.6667	84.4828	75	116	59	98	0.01926	0.01555	0.308693	0.475888	0.487566	1	0.677296	0.336117	0.799337	1	k__Bacteria|p__Firmicutes|c__Bacilli|o__Lactobacillales|f__Streptococcaceae|g__Streptococcus|s__Streptococcus_parasanguinis
B12	B56	20	23.2759	75	116	15	27	0.00267	0.00214	0.319229	0.329268	0.385164	1	0.824074	0.720893	0.945442	1	k__Bacteria|p__Firmicutes|c__Bacilli|o__Bacillales|f__Bacillales_unclassified|g__Gemella|s__Gemella_sanguinis
B12	B56	60	50.8621	75	116	45	59	0.0198	0.01579	0.326489	0.131437	0.235478	1	1.44915	0.236351	0.657843	1	k__Bacteria|p__Firmicutes|c__Erysipelotrichia|o__Erysipelotrichales|f__Erysipelotrichaceae|g__Turicibacter|s__Turicibacter_sanguinis
B12	B56	22.6667	32.7586	75	116	17	38	0.00656	0.005205	0.333798	0.0833172	0.178384	1	0.601633	0.144137	0.512145	1	k__Bacteria|p__Firmicutes|c__Clostridia|o__Clostridiales|f__Lachnospiraceae|g__Blautia|s__Blautia_hydrogenotrophica
B12	B56	90.6667	95.6897	75	116	68	111	0.74364	0.59	0.333889	0.0335609	0.0905836	1	0.43758	0.222438	0.657843	1	k__Bacteria|p__Bacteroidetes|c__Bacteroidia|o__Bacteroidales|f__Odoribacteraceae|g__Odoribacter|s__Odoribacter_splanchnicus
B12	B56	33.3333	39.6552	75	116	25	46	0.82953	0.650005	0.351843	0.329811	0.385164	1	0.76087	0.443937	0.814414	1	k__Bacteria|p__Bacteroidetes|c__Bacteroidia|o__Bacteroidales|f__Bacteroidaceae|g__Bacteroides|s__Bacteroides_sp_CAG_144
B12	B56	29.3333	21.5517	75	116	22	25	0.64814	0.50258	0.366952	0.0725282	0.159371	1	1.51094	0.233306	0.657843	1	k__Bacteria|p__Proteobacteria|c__Deltaproteobacteria|o__Desulfovibrionales|f__Desulfovibrionaceae|g__Desulfovibrio|s__Desulfovibrio_piger
B12	B56	94.6667	97.4138	75	116	71	113	5.32695	4.0573	0.39279	0.251829	0.321033	1	0.471239	0.435953	0.814414	1	k__Bacteria|p__Bacteroidetes|c__Bacteroidia|o__Bacteroidales|f__Bacteroidaceae|g__Bacteroides|s__Bacteroides_uniformis
B12	B56	69.3333	62.931	75	116	52	73	0.0015	0.00113	0.40864	0.0336299	0.0905836	1	1.33175	0.436409	0.814414	1	k__Bacteria|p__Actinobacteria|c__Coriobacteriia|o__Coriobacteriales|f__Coriobacteriaceae|g__Enorma|s__[Collinsella]_massiliensis
B12	B56	82.6667	86.2069	75	116	62	100	0.015215	0.011355	0.422167	0.277812	0.343664	1	0.763077	0.539689	0.823689	1	k__Bacteria|p__Firmicutes|c__Clostridia|o__Clostridiales|f__Peptostreptococcaceae|g__Romboutsia|s__Romboutsia_ilealis
B12	B56	58.6667	54.3103	75	116	44	63	0.04776	0.03515	0.442278	0.172865	0.262003	1	1.19406	0.65448	0.888604	1	k__Bacteria|p__Firmicutes|c__Clostridia|o__Clostridiales|f__Clostridiaceae|g__Clostridium|s__Clostridium_disporicum
B12	B56	70.6667	67.2414	75	116	53	78	0.05301	0.038995	0.442975	0.357609	0.401187	1	1.17366	0.636172	0.888604	1	k__Bacteria|p__Firmicutes|c__Bacilli|o__Lactobacillales|f__Lactobacillaceae|g__Lactobacillus|s__Lactobacillus_rogosae
B12	B56	37.3333	49.1379	75	116	28	57	0.05789	0.04252	0.445173	0.127621	0.235478	1	0.616648	0.136056	0.503416	1	k__Bacteria|p__Firmicutes|c__Erysipelotrichia|o__Erysipelotrichales|f__Erysipelotrichaceae|g__Erysipelatoclostridium|s__Clostridium_spiroforme
B12	B56	60	65.5172	75	116	45	76	0.1056	0.076785	0.459713	0.432879	0.460365	1	0.789474	0.446769	0.814414	1	k__Bacteria|p__Firmicutes|c__Clostridia|o__Clostridiales|f__Clostridiaceae|g__Clostridium|s__Clostridium_sp_CAG_58
B12	B56	68	65.5172	75	116	51	76	5.37499	3.88692	0.467635	0.133955	0.235478	1	1.11842	0.755641	0.945442	1	k__Bacteria|p__Firmicutes|c__Clostridia|o__Clostridiales|f__Ruminococcaceae|g__Ruminococcus|s__Ruminococcus_bromii
B12	B56	20	28.4483	75	116	15	33	0.00348	0.00246	0.500429	0.102333	0.208411	1	0.628788	0.232495	0.657843	1	k__Bacteria|p__Firmicutes|c__Negativicutes|o__Veillonellales|f__Veillonellaceae|g__Veillonella|s__Veillonella_rogosae
B12	B56	53.3333	37.069	75	116	40	43	0.51945	0.36143	0.523269	0.0134807	0.0536017	1	1.9402	0.0361373	0.291101	1	k__Bacteria|p__Bacteroidetes|c__Bacteroidia|o__Bacteroidales|f__Rikenellaceae|g__Alistipes|s__Alistipes_inops
B12	B56	66.6667	71.5517	75	116	50	83	0.014075	0.00973	0.532623	0.449702	0.472328	1	0.795181	0.520709	0.822761	1	k__Bacteria|p__Firmicutes|c__Erysipelotrichia|o__Erysipelotrichales|f__Erysipelotrichaceae|g__Holdemania|s__Holdemania_filiformis
B12	B56	77.3333	61.2069	75	116	58	71	0.45998	0.31689	0.537589	0.00192035	0.0137318	0.320698	2.16239	0.0264112	0.275667	1	k__Bacteria|p__Firmicutes|c__Firmicutes_unclassified|o__Firmicutes_unclassified|f__Firmicutes_unclassified|g__Firmicutes_unclassified|s__Firmicutes_bacterium_CAG_110
B12	B56	92	88.7931	75	116	69	103	1.38728	0.95488	0.538868	0.00231457	0.0137676	0.386533	1.45146	0.622039	0.882271	1	k__Bacteria|p__Bacteroidetes|c__Bacteroidia|o__Bacteroidales|f__Tannerellaceae|g__Parabacteroides|s__Parabacteroides_distasonis
B12	B56	92	95.6897	75	116	69	111	0.07204	0.04935	0.545748	0.203375	0.290287	1	0.518018	0.346027	0.799337	1	k__Bacteria|p__Firmicutes|c__Bacilli|o__Lactobacillales|f__Streptococcaceae|g__Streptococcus|s__Streptococcus_salivarius
B12	B56	42.6667	40.5172	75	116	32	47	0.544945	0.37243	0.549141	0.365061	0.403743	1	1.09253	0.880493	1	1	k__Bacteria|p__Firmicutes|c__Negativicutes|o__Acidaminococcales|f__Acidaminococcaceae|g__Phascolarctobacterium|s__Phascolarctobacterium_faecium
B12	B56	45.3333	45.6897	75	116	34	53	0.04871	0.03313	0.55608	0.462689	0.479243	1	0.985734	1	1	1	k__Bacteria|p__Bacteroidetes|c__Bacteroidia|o__Bacteroidales|f__Barnesiellaceae|g__Coprobacter|s__Coprobacter_secundus
B12	B56	96	93.1034	75	116	72	108	1.14701	0.77583	0.564072	0.0263918	0.0816192	1	1.77778	0.532085	0.822761	1	k__Bacteria|p__Firmicutes|c__Clostridia|o__Clostridiales|f__Eubacteriaceae|g__Eubacterium|s__Eubacterium_eligens
B12	B56	26.6667	25.8621	75	116	20	30	0.00244	0.001645	0.568794	0.34826	0.401099	1	1.04242	1	1	1	k__Bacteria|p__Firmicutes|c__Bacilli|o__Lactobacillales|f__Streptococcaceae|g__Streptococcus|s__Streptococcus_sp_A12
B12	B56	85.3333	88.7931	75	116	64	103	1.51728	1.01734	0.57669	0.0465254	0.116836	1	0.734334	0.508311	0.822761	1	k__Bacteria|p__Bacteroidetes|c__Bacteroidia|o__Bacteroidales|f__Barnesiellaceae|g__Barnesiella|s__Barnesiella_intestinihominis
B12	B56	21.3333	32.7586	75	116	16	38	0.800525	0.532965	0.586906	0.0708526	0.157765	1	0.556646	0.101043	0.439198	1	k__Bacteria|p__Actinobacteria|c__Actinobacteria|o__Bifidobacteriales|f__Bifidobacteriaceae|g__Bifidobacterium|s__Bifidobacterium_bifidum
B12	B56	92	82.7586	75	116	69	96	0.03149	0.02081	0.597617	0.0187087	0.0690497	1	2.39583	0.0847289	0.42878	1	k__Bacteria|p__Actinobacteria|c__Coriobacteriia|o__Eggerthellales|f__Eggerthellaceae|g__Gordonibacter|s__Gordonibacter_pamelaeae
B12	B56	88	87.069	75	116	66	101	0.08643	0.05658	0.61124	0.0246149	0.0791083	1	1.08911	1	1	1	k__Bacteria|p__Proteobacteria|c__Deltaproteobacteria|o__Desulfovibrionales|f__Desulfovibrionaceae|g__Bilophila|s__Bilophila_wadsworthia
B12	B56	65.3333	75	75	116	49	87	2.82718	1.82193	0.633896	0.336568	0.390325	1	0.628205	0.190402	0.611482	1	k__Bacteria|p__Bacteroidetes|c__Bacteroidia|o__Bacteroidales|f__Bacteroidaceae|g__Bacteroides|s__Bacteroides_dorei
B12	B56	22.6667	28.4483	75	116	17	33	0.5485	0.34006	0.689702	0.214128	0.300499	1	0.7372	0.403929	0.814414	1	k__Bacteria|p__Bacteroidetes|c__Bacteroidia|o__Bacteroidales|f__Bacteroidaceae|g__Bacteroides|s__Bacteroides_salyersiae
B12	B56	54.6667	23.2759	75	116	41	27	0.01009	0.00619	0.704915	1.95371e-06	5.43782e-05	0.000326269	3.97495	1.31312e-05	0.00219291	0.00219291	k__Bacteria|p__Firmicutes|c__Clostridia|o__Clostridiales|f__Clostridiaceae|g__Hungatella|s__Hungatella_hathewayi
B12	B56	29.3333	25	75	116	22	29	0.27258	0.16422	0.73105	0.231703	0.307258	1	1.24528	0.50871	0.822761	1	k__Bacteria|p__Firmicutes|c__Clostridia|o__Clostridiales|f__Clostridiales_unclassified|g__Monoglobus|s__Monoglobus_pectinilyticus
B12	B56	22.6667	28.4483	75	116	17	33	0.01488	0.00895	0.733415	0.247311	0.3177	1	0.7372	0.403929	0.814414	1	k__Bacteria|p__Firmicutes|c__Clostridia|o__Clostridiales|f__Lachnospiraceae|g__Lachnoclostridium|s__Clostridium_saccharolyticum
B12	B56	54.6667	44.8276	75	116	41	52	0.00943	0.0054	0.804298	0.0316252	0.0895153	1	1.48416	0.235634	0.657843	1	k__Bacteria|p__Firmicutes|c__Clostridia|o__Clostridiales|f__Ruminococcaceae|g__Anaerotruncus|s__Anaerotruncus_colihominis
B12	B56	48	42.2414	75	116	36	49	0.01096	0.00613	0.838289	0.118338	0.233274	1	1.26217	0.458855	0.822761	1	k__Bacteria|p__Firmicutes|c__Clostridia|o__Clostridiales|f__Lachnospiraceae|g__Lachnoclostridium|s__Clostridium_bolteae
B12	B56	92	93.9655	75	116	69	109	0.07411	0.04126	0.844924	0.0229788	0.0767492	1	0.738532	0.769746	0.952204	1	k__Bacteria|p__Firmicutes|c__Clostridia|o__Clostridiales|f__Ruminococcaceae|g__Flavonifractor|s__Flavonifractor_plautii
B12	B56	81.3333	84.4828	75	116	61	98	0.47132	0.262035	0.846947	0.00257026	0.0137676	0.429233	0.800292	0.691977	0.924482	1	k__Bacteria|p__Bacteroidetes|c__Bacteroidia|o__Bacteroidales|f__Rikenellaceae|g__Alistipes|s__Alistipes_shahii
B12	B56	76	68.9655	75	116	57	80	0.08549	0.047365	0.851934	0.0223453	0.0761565	1	1.425	0.326391	0.799337	1	k__Bacteria|p__Bacteroidetes|c__Bacteroidia|o__Bacteroidales|f__Odoribacteraceae|g__Butyricimonas|s__Butyricimonas_virosa
B12	B56	32	25	75	116	24	29	0.004375	0.0024	0.866249	0.0704766	0.157765	1	1.41176	0.322873	0.799337	1	k__Bacteria|p__Firmicutes|c__Clostridia|o__Clostridiales|f__Ruminococcaceae|g__Harryflintia|s__Harryflintia_acetispora
B12	B56	60	43.9655	75	116	45	51	0.00151	0.00082	0.880853	0.00994631	0.0437102	1	1.91176	0.0380393	0.291101	1	k__Bacteria|p__Actinobacteria|c__Coriobacteriia|o__Coriobacteriales|f__Coriobacteriaceae|g__Enorma|s__Enorma_massiliensis
B12	B56	80	81.8966	75	116	60	95	0.54979	0.28759	0.934867	0.0885039	0.187091	1	0.884211	0.850023	1	1	k__Bacteria|p__Bacteroidetes|c__Bacteroidia|o__Bacteroidales|f__Bacteroidaceae|g__Bacteroides|s__Bacteroides_thetaiotaomicron
B12	B56	29.3333	24.1379	75	116	22	28	0.003395	0.001715	0.985203	0.157771	0.256329	1	1.30458	0.500658	0.822761	1	k__Bacteria|p__Firmicutes|c__Bacilli|o__Lactobacillales|f__Streptococcaceae|g__Streptococcus|s__Streptococcus_australis
B12	B56	62.6667	77.5862	75	116	47	90	1.64583	0.829015	0.989345	0.384321	0.419487	1	0.484921	0.0323532	0.291101	1	k__Bacteria|p__Bacteroidetes|c__Bacteroidia|o__Bacteroidales|f__Bacteroidaceae|g__Bacteroides|s__Bacteroides_caccae
B12	B56	24	20.6897	75	116	18	24	0.11392	0.05714	0.995448	0.221428	0.300639	1	1.21053	0.596323	0.87356	1	k__Bacteria|p__Firmicutes|c__Erysipelotrichia|o__Erysipelotrichales|f__Erysipelotrichaceae|g__Faecalitalea|s__Faecalitalea_cylindroides
B12	B56	57.3333	39.6552	75	116	43	46	0.07161	0.034465	1.05503	0.00381498	0.0187383	0.637102	2.04484	0.0182452	0.234381	1	k__Bacteria|p__Firmicutes|c__Firmicutes_unclassified|o__Firmicutes_unclassified|f__Firmicutes_unclassified|g__Firmicutes_unclassified|s__Firmicutes_bacterium_CAG_94
B12	B56	62.6667	64.6552	75	116	47	75	0.01112	0.00532	1.06366	0.133356	0.235478	1	0.917619	0.877535	1	1	k__Bacteria|p__Firmicutes|c__Clostridia|o__Clostridiales|f__Lachnospiraceae|g__Lachnoclostridium|s__Clostridium_citroniae
B12	B56	73.3333	59.4828	75	116	55	69	0.0273	0.01299	1.0715	0.00249878	0.0137676	0.417297	1.87319	0.0624553	0.347668	1	k__Bacteria|p__Actinobacteria|c__Coriobacteriia|o__Eggerthellales|f__Eggerthellaceae|g__Eggerthella|s__Eggerthella_lenta
B12	B56	45.3333	36.2069	75	116	34	42	0.014055	0.006665	1.07641	0.033213	0.0905836	1	1.46109	0.228156	0.657843	1	k__Bacteria|p__Firmicutes|c__Firmicutes_unclassified|o__Firmicutes_unclassified|f__Firmicutes_unclassified|g__Firmicutes_unclassified|s__Firmicutes_bacterium_CAG_145
B12	B56	30.6667	25.8621	75	116	23	30	0.03839	0.017275	1.15204	0.0987242	0.203543	1	1.26795	0.509977	0.822761	1	k__Bacteria|p__Lentisphaerae|c__Lentisphaeria|o__Victivallales|f__Victivallaceae|g__Victivallis|s__Victivallis_vadensis
B12	B56	94.6667	97.4138	75	116	71	113	0.86874	0.38362	1.17925	0.00260093	0.0137676	0.434355	0.471239	0.435953	0.814414	1	k__Bacteria|p__Bacteroidetes|c__Bacteroidia|o__Bacteroidales|f__Rikenellaceae|g__Alistipes|s__Alistipes_finegoldii
B12	B56	34.6667	40.5172	75	116	26	47	0.085155	0.03646	1.22378	0.415031	0.447163	1	0.778984	0.448659	0.814414	1	k__Bacteria|p__Firmicutes|c__Clostridia|o__Clostridiales|f__Ruminococcaceae|g__Ruminococcus|s__Ruminococcus_callidus
B12	B56	73.3333	71.5517	75	116	55	83	0.12032	0.04988	1.27034	0.127573	0.235478	1	1.09337	0.869094	1	1	k__Bacteria|p__Firmicutes|c__Bacilli|o__Lactobacillales|f__Streptococcaceae|g__Streptococcus|s__Streptococcus_thermophilus
B12	B56	86.6667	77.5862	75	116	65	90	0.02878	0.01162	1.30846	0.000156076	0.00260647	0.0260647	1.87778	0.132774	0.503416	1	k__Bacteria|p__Firmicutes|c__Clostridia|o__Clostridiales|f__Clostridiales_unclassified|g__Intestinimonas|s__Intestinimonas_butyriciproducens
B12	B56	36	31.0345	75	116	27	36	0.00563	0.00213	1.40228	0.137513	0.236749	1	1.25	0.529547	0.822761	1	k__Bacteria|p__Firmicutes|c__Clostridia|o__Clostridiales|f__Ruminococcaceae|g__Pseudoflavonifractor|s__Pseudoflavonifractor_capillosus
B12	B56	92	89.6552	75	116	69	104	0.01709	0.00638	1.42152	7.78657e-07	3.85411e-05	0.000130036	1.32692	0.800496	0.982962	1	k__Bacteria|p__Firmicutes|c__Clostridia|o__Clostridiales|f__Ruminococcaceae|g__Ruminococcaceae_unclassified|s__Clostridium_leptum
B12	B56	77.3333	65.5172	75	116	58	76	0.028885	0.010625	1.44286	1.7459e-05	0.000416521	0.00291565	1.79567	0.105197	0.439198	1	k__Bacteria|p__Firmicutes|c__Clostridia|o__Clostridiales|f__Ruminococcaceae|g__Anaeromassilibacillus|s__Anaeromassilibacillus_sp_An250
B12	B56	66.6667	63.7931	75	116	50	74	0.14364	0.047815	1.58692	0.0182177	0.0690497	1	1.13514	0.756896	0.945442	1	k__Bacteria|p__Bacteroidetes|c__Bacteroidia|o__Bacteroidales|f__Rikenellaceae|g__Alistipes|s__Alistipes_indistinctus
B12	B56	58.6667	56.8966	75	116	44	66	0.682755	0.22211	1.62009	0.166949	0.260565	1	1.07527	0.881138	1	1	k__Bacteria|p__Bacteroidetes|c__Bacteroidia|o__Bacteroidales|f__Bacteroidaceae|g__Bacteroides|s__Bacteroides_cellulosilyticus
B12	B56	22.6667	26.7241	75	116	17	31	0.00326	0.00103	1.66223	0.457969	0.478006	1	0.803671	0.60949	0.877455	1	k__Bacteria|p__Synergistetes|c__Synergistia|o__Synergistales|f__Synergistaceae|g__Fretibacterium|s__Fretibacterium_fastidiosum
B12	B56	97.3333	99.1379	75	116	73	115	0.16324	0.0511	1.6756	2.06118e-09	3.44217e-07	3.44217e-07	0.317391	0.562388	0.83856	1	k__Bacteria|p__Firmicutes|c__Clostridia|o__Clostridiales|f__Ruminococcaceae|g__Ruthenibacterium|s__Ruthenibacterium_lactatiformans
B12	B56	28	20.6897	75	116	21	24	0.08502	0.02438	1.8021	0.055832	0.131323	1	1.49074	0.295315	0.770587	1	k__Bacteria|p__Firmicutes|c__Clostridia|o__Clostridiales|f__Clostridiaceae|g__Clostridium|s__Clostridium_sp_CAG_242
B12	B56	86.6667	86.2069	75	116	65	100	0.3812	0.109025	1.80589	0.000274926	0.00417387	0.0459126	1.04	1	1	1	k__Bacteria|p__Firmicutes|c__Clostridia|o__Clostridiales|f__Oscillospiraceae|g__Oscillibacter|s__Oscillibacter_sp_CAG_241
B12	B56	54.6667	39.6552	75	116	41	46	0.01112	0.003065	1.8592	0.0018109	0.0137318	0.30242	1.83504	0.0530681	0.307485	1	k__Bacteria|p__Firmicutes|c__Clostridia|o__Clostridiales|f__Lachnospiraceae|g__Lachnoclostridium|s__Clostridium_lavalense
B12	B56	56	48.2759	75	116	42	56	0.52908	0.14575	1.85999	0.0146781	0.0570058	1	1.36364	0.304419	0.782122	1	k__Bacteria|p__Bacteroidetes|c__Bacteroidia|o__Bacteroidales|f__Bacteroidaceae|g__Bacteroides|s__Bacteroides_fragilis
B12	B56	38.6667	21.5517	75	116	29	25	0.01922	0.00508	1.91971	0.00251067	0.0137676	0.419282	2.29478	0.0134623	0.204383	1	k__Bacteria|p__Firmicutes|c__Clostridia|o__Clostridiales|f__Lachnospiraceae|g__Lachnoclostridium|s__Clostridium_symbiosum
B12	B56	52	37.069	75	116	39	43	0.02862	0.00712	2.00707	0.00205567	0.0137318	0.343296	1.83915	0.0517564	0.307485	1	k__Bacteria|p__Firmicutes|c__Erysipelotrichia|o__Erysipelotrichales|f__Erysipelotrichaceae|g__Erysipelatoclostridium|s__Clostridium_innocuum
B12	B56	77.3333	69.8276	75	116	58	81	0.461035	0.11372	2.01939	0.00194812	0.0137318	0.325337	1.47422	0.318299	0.799337	1	k__Bacteria|p__Firmicutes|c__Clostridia|o__Clostridiales|f__Ruminococcaceae|g__Ruminococcaceae_unclassified|s__Eubacterium_siraeum
B12	B56	57.3333	35.3448	75	116	43	41	0.01033	0.00246	2.07011	4.38773e-05	0.000915939	0.00732751	2.45808	0.00441357	0.0921333	0.737066	k__Bacteria|p__Firmicutes|c__Clostridia|o__Clostridiales|f__Lachnospiraceae|g__Eisenbergiella|s__Eisenbergiella_tayi
B12	B56	77.3333	62.069	75	116	58	72	0.098255	0.02234	2.1369	8.2497e-05	0.00153078	0.013777	2.08497	0.0383487	0.291101	1	k__Bacteria|p__Proteobacteria|c__Gammaproteobacteria|o__Enterobacterales|f__Enterobacteriaceae|g__Escherichia|s__Escherichia_coli
B12	B56	50.6667	23.2759	75	116	38	27	1.12391	0.24311	2.20885	1.65595e-06	5.43782e-05	0.000276544	3.38539	0.000153389	0.012808	0.0256159	k__Archaea|p__Euryarchaeota|c__Methanobacteria|o__Methanobacteriales|f__Methanobacteriaceae|g__Methanobrevibacter|s__Methanobrevibacter_smithii
B12	B56	33.3333	24.1379	75	116	25	28	0.60219	0.10801	2.47905	0.0609357	0.141337	1	1.57143	0.187314	0.611482	1	k__Bacteria|p__Bacteroidetes|c__Bacteroidia|o__Bacteroidales|f__Bacteroidaceae|g__Bacteroides|s__Bacteroides_intestinalis
B12	B56	37.3333	23.2759	75	116	28	27	0.020095	0.00347	2.53383	0.0026381	0.0137676	0.440562	1.96375	0.0491396	0.307485	1	k__Bacteria|p__Firmicutes|c__Erysipelotrichia|o__Erysipelotrichales|f__Erysipelotrichaceae|g__Dielma|s__Dielma_fastidiosa
B12	B56	74.6667	58.6207	75	116	56	68	1.99394	0.33054	2.59272	0.000897231	0.0109972	0.149838	2.0805	0.0295543	0.290327	1	k__Bacteria|p__Verrucomicrobia|c__Verrucomicrobiae|o__Verrucomicrobiales|f__Akkermansiaceae|g__Akkermansia|s__Akkermansia_muciniphila
B12	B56	41.3333	24.1379	75	116	31	28	0.13997	0.022465	2.63937	0.001359	0.0128403	0.226953	2.21429	0.0159675	0.222215	1	k__Bacteria|p__Firmicutes|c__Firmicutes_unclassified|o__Firmicutes_unclassified|f__Firmicutes_unclassified|g__Firmicutes_unclassified|s__Firmicutes_bacterium_CAG_170
B12	B56	57.3333	32.7586	75	116	43	38	0.05164	0.006555	2.97782	6.8607e-07	3.85411e-05	0.000114574	2.75822	0.000972577	0.0541401	0.16242	k__Bacteria|p__Firmicutes|c__Clostridia|o__Clostridiales|f__Ruminococcaceae|g__Ruminococcaceae_unclassified|s__Ruminococcaceae_bacterium_D5

## Sheet: Transit time pathways
Class 1	Class2	Class 1 prevalence (%)	Class 2 prevalence (%)	Class 1 total	Class 2 total	Class 1 positives	Class 2 positives	Class 1 median relative abundance	Class 2 median relative abundance	Effect size	pvalue MWU	pvalue MWU FDR	pvalue MWU Bonferroni	oddsratio Fisher	pvalue F	pvalue F FDR	pvalue F Bonferroni	Pathway
E1	E3	100	100	70	161	70	161	2857.8	2872.11	-0.00720703	0.488464	0.494692	1		1	1	1	1CMET2-PWY: N10-formyl-tetrahydrofolate biosynthesis
E1	E3	100	100	70	161	70	161	2283.52	2083.15	0.132494	0.0420136	0.0987757	1		1	1	1	ANAEROFRUCAT-PWY: homolactic fermentation
E1	E3	100	100	70	161	70	161	4894.39	4669.79	0.0677721	0.0468332	0.106658	1		1	1	1	ANAGLYCOLYSIS-PWY: glycolysis III (from glucose)
E1	E3	100	99.3789	70	161	70	160	732.62	698.093	0.0696468	0.111223	0.202187	1	inf	1	1	1	ARG+POLYAMINE-SYN: superpathway of arginine and polyamine biosynthesis
E1	E3	98.5714	100	70	161	69	161	611.198	491.15	0.315477	0.0119393	0.035853	1	0	0.30303	1	1	ARGININE-SYN4-PWY: L-ornithine de novo biosynthesis
E1	E3	41.4286	63.354	70	161	29	102	32.4643	40.3188	-0.312596	0.000513458	0.00275105	0.5227	0.409134	0.00241165	0.0336309	1	ARGORNPROST-PWY: arginine, ornithine and proline interconversion
E1	E3	100	100	70	161	70	161	2038.29	1545.64	0.399156	0.00531368	0.0189137	1		1	1	1	ARGSYN-PWY: L-arginine biosynthesis I (via L-ornithine)
E1	E3	100	100	70	161	70	161	850.313	660.255	0.364971	0.00990903	0.0311339	1		1	1	1	ARGSYNBSUB-PWY: L-arginine biosynthesis II (acetyl cycle)
E1	E3	100	100	70	161	70	161	7657.52	6643.47	0.204941	7.50434e-06	9.09455e-05	0.00763942		1	1	1	ARO-PWY: chorismate biosynthesis I
E1	E3	100	100	70	161	70	161	1654.53	1514.89	0.127208	0.0178404	0.0488213	1		1	1	1	ASPASN-PWY: superpathway of L-aspartate and L-asparagine biosynthesis
E1	E3	25.7143	37.2671	70	161	18	60	18.4113	15.2728	0.269622	0.038237	0.09116	1	0.582692	0.0974624	0.624987	1	AST-PWY: L-arginine degradation II (AST pathway)
E1	E3	97.1429	98.7578	70	161	68	159	260.812	276.77	-0.0856802	0.0629227	0.13457	1	0.427673	0.586581	1	1	BIOTIN-BIOSYNTHESIS-PWY: biotin biosynthesis I
E1	E3	100	100	70	161	70	161	5241.17	4739.3	0.145214	0.00600463	0.0210059	1		1	1	1	BRANCHED-CHAIN-AA-SYN-PWY: superpathway of branched amino acid biosynthesis
E1	E3	100	100	70	161	70	161	6709.71	5676.96	0.241133	5.34463e-05	0.000428412	0.0544084		1	1	1	CALVIN-PWY: Calvin-Benson-Bassham cycle
E1	E3	100	100	70	161	70	161	303.135	292.174	0.0531298	0.432381	0.472301	1		1	1	1	CENTFERM-PWY: pyruvate fermentation to butanoate
E1	E3	100	100	70	161	70	161	374.152	441.709	-0.239471	0.0345504	0.0835447	1		1	1	1	CITRULBIO-PWY: L-citrulline biosynthesis
E1	E3	100	100	70	161	70	161	7469.44	6991.57	0.0953849	0.0401277	0.0947797	1		1	1	1	COA-PWY-1: coenzyme A biosynthesis II (mammalian)
E1	E3	100	100	70	161	70	161	2231.77	2081.61	0.100487	0.0908175	0.176436	1		1	1	1	COA-PWY: coenzyme A biosynthesis I
E1	E3	100	100	70	161	70	161	1773.48	1284.29	0.465612	5.68346e-05	0.000452013	0.0578577		1	1	1	COBALSYN-PWY: adenosylcobalamin salvage from cobinamide I
E1	E3	97.1429	99.3789	70	161	68	160	597.506	585.95	0.0281766	0.255712	0.34755	1	0.2125	0.218738	0.972714	1	COLANSYN-PWY: colanic acid building blocks biosynthesis
E1	E3	100	100	70	161	70	161	7391.34	6291.78	0.232367	4.45418e-06	5.81327e-05	0.00453435		1	1	1	COMPLETE-ARO-PWY: superpathway of aromatic amino acid biosynthesis
E1	E3	87.1429	83.2298	70	161	61	134	86.9428	95.7279	-0.138873	0.188264	0.286477	1	1.36567	0.55533	1	1	CRNFORCAT-PWY: creatinine degradation I
E1	E3	100	100	70	161	70	161	1031.74	1105.59	-0.0997377	0.172116	0.268322	1		1	1	1	DAPLYSINESYN-PWY: L-lysine biosynthesis I
E1	E3	100	100	70	161	70	161	3206.6	2964.05	0.113473	0.0313999	0.0775852	1		1	1	1	DENOVOPURINE2-PWY: superpathway of purine nucleotides de novo biosynthesis II
E1	E3	100	100	70	161	70	161	4523.53	3891.86	0.216987	0.000215038	0.0012877	0.218909		1	1	1	DTDPRHAMSYN-PWY: dTDP-L-rhamnose biosynthesis I
E1	E3	30	35.4037	70	161	21	57	95.3058	128.154	-0.427247	0.148811	0.249571	1	0.781955	0.452821	1	1	ENTBACSYN-PWY: enterobactin biosynthesis
E1	E3	97.1429	96.2733	70	161	68	155	153.797	189.797	-0.303435	0.00208232	0.00875953	1	1.31613	1	1	1	FAO-PWY: fatty acid &beta;-oxidation I
E1	E3	97.1429	98.7578	70	161	68	159	237.441	264.902	-0.157887	0.0736291	0.151118	1	0.427673	0.586581	1	1	FASYN-ELONG-PWY: fatty acid elongation -- saturated
E1	E3	97.1429	98.7578	70	161	68	159	156.467	176.478	-0.173638	0.0653418	0.138868	1	0.427673	0.586581	1	1	FASYN-INITIAL-PWY: superpathway of fatty acid biosynthesis initiation (E. coli)
E1	E3	98.5714	100	70	161	69	161	865.243	822.833	0.0725055	0.302449	0.385268	1	0	0.30303	1	1	FERMENTATION-PWY: mixed acid fermentation
E1	E3	98.5714	98.1366	70	161	69	158	551.246	539.124	0.0320781	0.32024	0.399504	1	1.31013	1	1	1	FOLSYN-PWY: superpathway of tetrahydrofolate biosynthesis and salvage
E1	E3	92.8571	96.2733	70	161	65	155	81.7195	79.5544	0.0387384	0.13988	0.238522	1	0.503226	0.315435	1	1	FUC-RHAMCAT-PWY: superpathway of fucose and rhamnose degradation
E1	E3	97.1429	98.7578	70	161	68	159	165.845	235.915	-0.508432	0.000852158	0.00403763	0.867496	0.427673	0.586581	1	1	FUCCAT-PWY: fucose degradation
E1	E3	100	100	70	161	70	161	1728.47	1248.5	0.469298	3.89618e-08	1.3221e-06	3.96631e-05		1	1	1	GALACT-GLUCUROCAT-PWY: superpathway of hexuronide and hexuronate degradation
E1	E3	37.1429	54.0373	70	161	26	87	15.0957	17.6624	-0.226547	0.0115313	0.0352518	1	0.502612	0.0219498	0.208831	1	GALACTARDEG-PWY: D-galactarate degradation I
E1	E3	100	100	70	161	70	161	1605.31	1201.51	0.418005	3.10328e-06	4.43414e-05	0.00315914		1	1	1	GALACTUROCAT-PWY: D-galacturonate degradation I
E1	E3	100	100	70	161	70	161	1490.65	1089.17	0.452709	1.20074e-06	2.1075e-05	0.00122235		1	1	1	GLCMANNANAUT-PWY: superpathway of N-acetylglucosamine, N-acetylmannosamine and N-acetylneuraminate degradation
E1	E3	37.1429	55.2795	70	161	26	89	16.868	18.2722	-0.115366	0.00786745	0.0265201	1	0.478039	0.014721	0.152918	1	GLUCARDEG-PWY: D-glucarate degradation I
E1	E3	37.1429	54.0373	70	161	26	87	15.0957	17.6624	-0.226547	0.0115313	0.0352518	1	0.502612	0.0219498	0.208831	1	GLUCARGALACTSUPER-PWY: superpathway of D-glucarate and D-galactarate degradation
E1	E3	100	100	70	161	70	161	484.532	533.299	-0.138352	0.236808	0.330234	1		1	1	1	GLUCONEO-PWY: gluconeogenesis I
E1	E3	50	59.0062	70	161	35	95	26.877	40.2028	-0.580923	0.0702886	0.146264	1	0.694737	0.248371	1	1	GLUCOSE1PMETAB-PWY: glucose and glucose-1-phosphate degradation
E1	E3	100	100	70	161	70	161	1713.83	1244.5	0.46166	9.06549e-09	4.3827e-07	9.22867e-06		1	1	1	GLUCUROCAT-PWY: superpathway of &beta;-D-glucuronide and D-glucuronate degradation
E1	E3	55.7143	84.472	70	161	39	136	48.1122	71.5046	-0.571634	4.2225e-05	0.000354274	0.042985	0.231262	8.46243e-06	0.00110716	0.00861475	GLUDEG-I-PWY: GABA shunt
E1	E3	100	100	70	161	70	161	525.403	379.76	0.468337	0.00475326	0.017532	1		1	1	1	GLUTORN-PWY: L-ornithine biosynthesis
E1	E3	97.1429	100	70	161	68	161	294.948	227.542	0.374327	0.0337394	0.0817778	1	0	0.0909091	0.597067	1	GLYCOCAT-PWY: glycogen degradation I (bacterial)
E1	E3	100	100	70	161	70	161	2268.67	1751.23	0.373476	0.00062928	0.0032684	0.640607		1	1	1	GLYCOGENSYNTH-PWY: glycogen biosynthesis I (from ADP-D-Glucose)
E1	E3	54.2857	65.8385	70	161	38	106	15.8242	17.004	-0.103742	0.0483203	0.109069	1	0.616156	0.10564	0.643962	1	GLYCOL-GLYOXDEG-PWY: superpathway of glycol metabolism and degradation
E1	E3	100	100	70	161	70	161	427.435	441.643	-0.0471758	0.421458	0.465846	1		1	1	1	GLYCOLYSIS-E-D: superpathway of glycolysis and Entner-Doudoroff
E1	E3	42.8571	54.6584	70	161	30	88	66.6197	104.714	-0.652432	0.0234647	0.0617236	1	0.622159	0.115748	0.693127	1	GLYCOLYSIS-TCA-GLYOX-BYPASS: superpathway of glycolysis, pyruvate dehydrogenase, TCA, and glyoxylate bypass
E1	E3	100	100	70	161	70	161	1232.42	1143.7	0.107788	0.0826975	0.164398	1		1	1	1	GLYCOLYSIS: glycolysis I (from glucose 6-phosphate)
E1	E3	58.5714	67.7019	70	161	41	109	28.45	46.3335	-0.703624	0.0394153	0.0933134	1	0.67447	0.229887	0.992914	1	GLYOXYLATE-BYPASS: glyoxylate cycle
E1	E3	100	100	70	161	70	161	219.811	167.423	0.392771	0.000233081	0.00137952	0.237277		1	1	1	GOLPDLCAT-PWY: superpathway of glycerol degradation to 1,3-propanediol
E1	E3	97.1429	93.7888	70	161	68	151	84.4593	69.987	0.271169	0.0843276	0.166913	1	2.25166	0.355339	1	1	HEME-BIOSYNTHESIS-II: heme biosynthesis I (aerobic)
E1	E3	100	100	70	161	70	161	227.132	174.372	0.381363	0.00481281	0.0176875	1		1	1	1	HEMESYN2-PWY: heme biosynthesis II (anaerobic)
E1	E3	100	100	70	161	70	161	610.28	534.293	0.191842	0.0634546	0.135306	1		1	1	1	HEXITOLDEGSUPER-PWY: superpathway of hexitol degradation (bacteria)
E1	E3	100	100	70	161	70	161	2007.01	2439.29	-0.281411	0.0024145	0.00963908	1		1	1	1	HISDEG-PWY: L-histidine degradation I
E1	E3	100	100	70	161	70	161	2546.14	2164.25	0.234449	0.0116754	0.0354791	1		1	1	1	HISTSYN-PWY: L-histidine biosynthesis
E1	E3	100	100	70	161	70	161	1818.49	1745.13	0.0594066	0.27181	0.361703	1		1	1	1	HOMOSER-METSYN-PWY: L-methionine biosynthesis I
E1	E3	100	100	70	161	70	161	1732.66	1708.68	0.0201047	0.23286	0.326068	1		1	1	1	HSERMETANA-PWY: L-methionine biosynthesis III
E1	E3	100	100	70	161	70	161	8339.69	7298.96	0.192303	8.837e-05	0.000620419	0.0899607		1	1	1	ILEUSYN-PWY: L-isoleucine biosynthesis I (from threonine)
E1	E3	22.8571	38.5093	70	161	16	62	12.8537	11.3081	0.18482	0.0097412	0.0307967	1	0.473118	0.0233242	0.210124	1	KDO-NAGLIPASYN-PWY: superpathway of (Kdo)2-lipid A biosynthesis
E1	E3	50	59.6273	70	161	35	96	21.213	28.6835	-0.435272	0.0387349	0.0919163	1	0.677083	0.194884	0.93581	1	KETOGLUCONMET-PWY: ketogluconate metabolism
E1	E3	100	98.7578	70	161	70	159	359.58	280.115	0.360293	0.0244269	0.0639244	1	inf	1	1	1	LACTOSECAT-PWY: lactose and galactose degradation I
E1	E3	100	100	70	161	70	161	3173.52	2841.32	0.159525	0.197226	0.296129	1		1	1	1	MET-SAM-PWY: superpathway of S-adenosyl-L-methionine biosynthesis
E1	E3	27.1429	49.0683	70	161	19	79	34.855	82.4251	-1.24172	3.90908e-05	0.000334407	0.0397944	0.386696	0.00227739	0.0321998	1	METHANOGENESIS-PWY: methanogenesis from H2 and CO2
E1	E3	35.7143	50.3106	70	161	25	81	12.8482	11.6465	0.141678	0.033126	0.0807655	1	0.548697	0.0451231	0.345379	1	METHGLYUT-PWY: superpathway of methylglyoxal degradation
E1	E3	100	100	70	161	70	161	2904.87	2828.86	0.0382526	0.256402	0.347817	1		1	1	1	METSYN-PWY: L-homoserine and L-methionine biosynthesis
E1	E3	82.8571	85.7143	70	161	58	138	42.2055	94.7999	-1.16746	0.00149353	0.00660075	1	0.805556	0.556669	1	1	NAD-BIOSYNTHESIS-II: NAD salvage pathway II
E1	E3	95.7143	93.1677	70	161	67	150	147.282	124.233	0.245529	0.0172275	0.0477864	1	1.63778	0.560658	1	1	NAGLIPASYN-PWY: lipid IVA biosynthesis
E1	E3	100	100	70	161	70	161	8155.44	7112.97	0.19731	0.000129229	0.000854256	0.131555		1	1	1	NONMEVIPP-PWY: methylerythritol phosphate pathway I
E1	E3	100	100	70	161	70	161	5090.7	4313.97	0.238845	4.24572e-05	0.000354274	0.0432214		1	1	1	NONOXIPENT-PWY: pentose phosphate pathway (non-oxidative branch)
E1	E3	98.5714	98.1366	70	161	69	158	1039.05	934.329	0.153269	0.105055	0.194168	1	1.31013	1	1	1	OANTIGEN-PWY: O-antigen building blocks biosynthesis (E. coli)
E1	E3	42.8571	53.4161	70	161	30	86	52.2217	94.3072	-0.852719	0.033163	0.0807655	1	0.65407	0.154011	0.847475	1	P105-PWY: TCA cycle IV (2-oxoglutarate decarboxylase)
E1	E3	74.2857	90.6832	70	161	52	146	89.1017	309.313	-1.79554	7.13599e-08	2.07555e-06	7.26443e-05	0.296804	0.00187225	0.0280213	1	P108-PWY: pyruvate fermentation to propanoate I
E1	E3	85.7143	88.8199	70	161	60	143	38.6291	34.6949	0.154967	0.42055	0.465846	1	0.755245	0.51562	1	1	P122-PWY: heterolactic fermentation
E1	E3	98.5714	94.4099	70	161	69	152	270.536	236.891	0.191599	0.153407	0.2527	1	4.08553	0.289461	1	1	P124-PWY: Bifidobacterium shunt
E1	E3	100	100	70	161	70	161	258.628	271.969	-0.0725667	0.069248	0.144752	1		1	1	1	P161-PWY: acetylene degradation
E1	E3	100	100	70	161	70	161	267.88	246.714	0.118749	0.21119	0.308452	1		1	1	1	P162-PWY: L-glutamate degradation V (via hydroxyglutarate)
E1	E3	78.5714	92.5466	70	161	55	149	26.8371	43.8575	-0.708598	2.85236e-07	6.04939e-06	0.000290371	0.295302	0.00369531	0.045876	1	P163-PWY: L-lysine fermentation to acetate and butanoate
E1	E3	100	99.3789	70	161	70	160	312.774	341.395	-0.126323	0.0260677	0.067182	1	inf	1	1	1	P164-PWY: purine nucleobases degradation I (anaerobic)
E1	E3	100	100	70	161	70	161	227.614	222.91	0.0301291	0.350287	0.418044	1		1	1	1	P185-PWY: formaldehyde assimilation III (dihydroxyacetone cycle)
E1	E3	24.2857	36.646	70	161	17	59	5.68413	4.96864	0.19409	0.0260358	0.067182	1	0.554525	0.0696735	0.495997	1	P221-PWY: octane oxidation
E1	E3	48.5714	52.1739	70	161	34	84	19.8711	28.1916	-0.504591	0.174662	0.270633	1	0.865741	0.668375	1	1	P23-PWY: reductive TCA cycle I
E1	E3	100	100	70	161	70	161	1243.85	1160.79	0.0997049	0.380892	0.440883	1		1	1	1	P4-PWY: superpathway of L-lysine, L-threonine and L-methionine biosynthesis I
E1	E3	100	100	70	161	70	161	772.289	940.822	-0.284781	0.000305545	0.00174745	0.311045		1	1	1	P42-PWY: incomplete reductive TCA cycle
E1	E3	100	100	70	161	70	161	514.639	522.751	-0.0225629	0.491881	0.494798	1		1	1	1	P441-PWY: superpathway of N-acetylneuraminate degradation
E1	E3	100	100	70	161	70	161	321.076	306.011	0.0693315	0.149147	0.249724	1		1	1	1	P461-PWY: hexitol fermentation to lactate, formate, ethanol and acetate
E1	E3	100	100	70	161	70	161	5574.78	4997.44	0.157725	0.000380424	0.00207097	0.387272		1	1	1	PANTO-PWY: phosphopantothenate biosynthesis I
E1	E3	100	100	70	161	70	161	3196.1	2890.37	0.14506	0.0214047	0.0570418	1		1	1	1	PANTOSYN-PWY: pantothenate and coenzyme A biosynthesis I
E1	E3	100	100	70	161	70	161	928.723	866.234	0.100491	0.126979	0.222871	1		1	1	1	PENTOSE-P-PWY: pentose phosphate pathway
E1	E3	100	100	70	161	70	161	8053.63	7552.02	0.0927757	0.0290539	0.0735744	1		1	1	1	PEPTIDOGLYCANSYN-PWY: peptidoglycan biosynthesis I (meso-diaminopimelate containing)
E1	E3	100	100	70	161	70	161	1054.5	966.613	0.125549	0.0309485	0.0768695	1		1	1	1	PHOSLIPSYN-PWY: superpathway of phospholipid biosynthesis I (bacteria)
E1	E3	90	90.6832	70	161	63	146	132.744	115.793	0.197097	0.320169	0.399504	1	0.924658	1	1	1	POLYAMINSYN3-PWY: superpathway of polyamine biosynthesis II
E1	E3	100	100	70	161	70	161	811.437	819.27	-0.0138611	0.202622	0.300684	1		1	1	1	POLYAMSYN-PWY: superpathway of polyamine biosynthesis I
E1	E3	60	72.0497	70	161	42	116	35.2576	57.7909	-0.71291	0.00236711	0.00956236	1	0.581897	0.0899495	0.597067	1	POLYISOPRENSYN-PWY: polyisoprenoid biosynthesis (E. coli)
E1	E3	100	100	70	161	70	161	324.074	344.871	-0.0897327	0.456074	0.482122	1		1	1	1	PPGPPMET-PWY: ppGpp biosynthesis
E1	E3	100	100	70	161	70	161	2197.43	2075.45	0.082395	0.173211	0.269205	1		1	1	1	PRPP-PWY: superpathway of histidine, purine, and pyrimidine biosynthesis
E1	E3	100	100	70	161	70	161	6757.38	6015.93	0.167677	0.00188081	0.0080448	1		1	1	1	PWY-1042: glycolysis IV (plant cytosol)
E1	E3	100	100	70	161	70	161	703.921	934.223	-0.408353	0.00146679	0.00654908	1		1	1	1	PWY-1269: CMP-3-deoxy-D-manno-octulosonate biosynthesis I
E1	E3	78.5714	86.3354	70	161	55	139	96.0795	92.3934	0.0564383	0.167283	0.265401	1	0.580336	0.171511	0.893119	1	PWY-1861: formaldehyde assimilation II (RuMP Cycle)
E1	E3	98.5714	100	70	161	69	161	400.647	388.849	0.0431248	0.33221	0.406478	1	0	0.30303	1	1	PWY-241: C4 photosynthetic carbon assimilation cycle, NADP-ME type
E1	E3	20	39.7516	70	161	14	64	42.5551	24.9888	0.768053	0.00448222	0.0165924	1	0.378906	0.0039038	0.0478803	1	PWY-2723: trehalose degradation V
E1	E3	100	100	70	161	70	161	981.793	995.533	-0.0200498	0.254336	0.346142	1		1	1	1	PWY-2941: L-lysine biosynthesis II
E1	E3	100	100	70	161	70	161	6961.55	6085.08	0.194132	0.000971307	0.00453574	0.98879		1	1	1	PWY-2942: L-lysine biosynthesis III
E1	E3	100	100	70	161	70	161	4014.15	3680.24	0.125296	0.0172833	0.0478108	1		1	1	1	PWY-3001: superpathway of L-isoleucine biosynthesis I
E1	E3	28.5714	38.5093	70	161	20	62	14.7788	10.9927	0.42698	0.120319	0.215263	1	0.63871	0.17846	0.895525	1	PWY-3781: aerobic respiration I (cytochrome c)
E1	E3	100	100	70	161	70	161	2754.3	2799.33	-0.0233938	0.362265	0.428322	1		1	1	1	PWY-3841: folate transformations II
E1	E3	37.1429	47.8261	70	161	26	77	15.6905	17.6738	-0.17172	0.0429069	0.100015	1	0.644628	0.151018	0.844628	1	PWY-4041: &gamma;-glutamyl cycle
E1	E3	100	100	70	161	70	161	1430.3	1558.04	-0.123421	0.104473	0.194075	1		1	1	1	PWY-4242: pantothenate and coenzyme A biosynthesis III
E1	E3	71.4286	87.5776	70	161	50	141	56.5192	215.939	-1.93381	1.16377e-07	3.20193e-06	0.000118472	0.35461	0.00431953	0.0511312	1	PWY-4702: phytate degradation I
E1	E3	100	100	70	161	70	161	930.664	1091.17	-0.229545	0.00383662	0.0144121	1		1	1	1	PWY-4981: L-proline biosynthesis II (from arginine)
E1	E3	100	100	70	161	70	161	318.471	369.494	-0.21439	0.0418219	0.0985524	1		1	1	1	PWY-4984: urea cycle
E1	E3	21.4286	40.3727	70	161	15	65	20.5315	24.5681	-0.258947	0.00170265	0.00734446	1	0.402797	0.00654817	0.0748993	1	PWY-5004: superpathway of L-citrulline metabolism
E1	E3	84.2857	75.7764	70	161	59	122	267.698	232.083	0.205966	0.0309592	0.0768695	1	1.71461	0.167464	0.893119	1	PWY-5005: biotin biosynthesis II
E1	E3	70	90.6832	70	161	49	146	40.9593	57.9446	-0.500483	5.30131e-05	0.000428412	0.0539674	0.239726	0.000143477	0.0049222	0.14606	PWY-5022: 4-aminobutanoate degradation V
E1	E3	100	100	70	161	70	161	475.732	518.908	-0.125329	0.0940104	0.180027	1		1	1	1	PWY-5030: L-histidine degradation III
E1	E3	54.2857	59.6273	70	161	38	96	27.9094	33.9406	-0.282261	0.141866	0.240699	1	0.804036	0.470983	1	1	PWY-5083: NAD/NADH phosphorylation and dephosphorylation
E1	E3	100	100	70	161	70	161	7559.24	6579.79	0.200199	0.000248523	0.001454	0.252996		1	1	1	PWY-5097: L-lysine biosynthesis VI
E1	E3	100	100	70	161	70	161	2177.21	2038.42	0.0950292	0.0178404	0.0488213	1		1	1	1	PWY-5100: pyruvate fermentation to acetate and lactate II
E1	E3	100	100	70	161	70	161	427.52	432.251	-0.015878	0.389903	0.448518	1		1	1	1	PWY-5101: L-isoleucine biosynthesis II
E1	E3	100	100	70	161	70	161	4666.65	4285.13	0.123049	0.0142431	0.041431	1		1	1	1	PWY-5103: L-isoleucine biosynthesis III
E1	E3	100	100	70	161	70	161	1077.11	1266.41	-0.233575	0.0672732	0.141789	1		1	1	1	PWY-5104: L-isoleucine biosynthesis IV
E1	E3	98.5714	98.1366	70	161	69	158	331.027	352.514	-0.0907332	0.174035	0.270073	1	1.31013	1	1	1	PWY-5121: superpathway of geranylgeranyl diphosphate biosynthesis II (via MEP)
E1	E3	97.1429	96.2733	70	161	68	155	130.804	162.703	-0.314833	0.0032038	0.0123927	1	1.31613	1	1	1	PWY-5136: fatty acid &beta;-oxidation II (peroxisome)
E1	E3	47.1429	58.3851	70	161	33	94	35.0938	40.7298	-0.214869	0.0330093	0.0807655	1	0.63571	0.149923	0.844628	1	PWY-5138: unsaturated, even numbered fatty acid &beta;-oxidation
E1	E3	100	100	70	161	70	161	729.818	536.248	0.444636	0.0019997	0.00844686	1		1	1	1	PWY-5154: L-arginine biosynthesis III (via N-acetyl-L-citrulline)
E1	E3	55.7143	59.0062	70	161	39	95	17.6085	21.8588	-0.311942	0.167803	0.265401	1	0.874024	0.665394	1	1	PWY-5173: superpathway of acetyl-CoA biosynthesis
E1	E3	100	100	70	161	70	161	933.885	786.203	0.248343	0.0051524	0.0185341	1		1	1	1	PWY-5177: glutaryl-CoA degradation
E1	E3	100	100	70	161	70	161	2367.87	2172.7	0.124105	0.072441	0.149281	1		1	1	1	PWY-5188: tetrapyrrole biosynthesis I (from glutamate)
E1	E3	100	98.7578	70	161	70	159	276.599	293.708	-0.0865877	0.240793	0.333961	1	inf	1	1	1	PWY-5189: tetrapyrrole biosynthesis II (from glycine)
E1	E3	27.1429	47.8261	70	161	19	77	22.1497	70.8137	-1.67674	5.92301e-05	0.000460276	0.0602962	0.406417	0.00367134	0.045876	1	PWY-5198: factor 420 biosynthesis
E1	E3	100	100	70	161	70	161	246.024	211.22	0.220053	0.307702	0.389119	1		1	1	1	PWY-5304: superpathway of sulfur oxidation (Acidianus ambivalens)
E1	E3	94.2857	100	70	161	66	161	487.356	702.44	-0.527398	0.00032796	0.00184455	0.333863	0	0.00793269	0.0887416	1	PWY-5345: superpathway of L-methionine biosynthesis (by sulfhydrylation)
E1	E3	100	100	70	161	70	161	2635.97	2434.75	0.114559	0.0537039	0.118079	1		1	1	1	PWY-5347: superpathway of L-methionine biosynthesis (transsulfuration)
E1	E3	98.5714	99.3789	70	161	69	160	670.92	331.273	1.01812	0.00278424	0.0109435	1	0.43125	0.515152	1	1	PWY-5367: petroselinate biosynthesis
E1	E3	94.2857	98.1366	70	161	66	158	115.851	80.155	0.53141	0.183263	0.280544	1	0.313291	0.203289	0.959062	1	PWY-5384: sucrose degradation IV (sucrose phosphorylase)
E1	E3	82.8571	81.3665	70	161	58	131	75.3132	84.9897	-0.174385	0.421224	0.465846	1	1.10687	0.854452	1	1	PWY-5464: superpathway of cytosolic glycolysis (plants), pyruvate dehydrogenase and TCA cycle
E1	E3	100	100	70	161	70	161	1206.63	1130.22	0.0943803	0.128322	0.224453	1		1	1	1	PWY-5484: glycolysis II (from fructose 6-phosphate)
E1	E3	100	100	70	161	70	161	208.957	305.534	-0.548127	0.00353033	0.01341	1		1	1	1	PWY-5505: L-glutamate and L-glutamine biosynthesis
E1	E3	42.8571	52.795	70	161	30	85	39.2525	62.2566	-0.665442	0.03325	0.080784	1	0.670588	0.197813	0.945416	1	PWY-561: superpathway of glyoxylate cycle and fatty acid degradation
E1	E3	28.5714	47.8261	70	161	20	77	16.9109	19.6552	-0.21696	0.00352065	0.01341	1	0.436364	0.00877487	0.0970958	1	PWY-5656: mannosylglycerate biosynthesis I
E1	E3	100	100	70	161	70	161	1992.4	1958.24	0.0249518	0.44082	0.47588	1		1	1	1	PWY-5659: GDP-mannose biosynthesis
E1	E3	100	100	70	161	70	161	6968.44	6074.84	0.197989	0.000213307	0.00128489	0.217147		1	1	1	PWY-5667: CDP-diacylglycerol biosynthesis I
E1	E3	40	47.205	70	161	28	76	14.1821	20.4374	-0.527142	0.0907578	0.176436	1	0.745614	0.318795	1	1	PWY-5675: nitrate reduction V (assimilatory)
E1	E3	100	100	70	161	70	161	929.463	907.994	0.0337144	0.491027	0.494692	1		1	1	1	PWY-5676: acetyl-CoA fermentation to butanoate II
E1	E3	100	100	70	161	70	161	9492.67	8593.84	0.143512	0.000280076	0.00161999	0.285118		1	1	1	PWY-5686: UMP biosynthesis
E1	E3	100	100	70	161	70	161	911.66	874.386	0.0602254	0.221874	0.318123	1		1	1	1	PWY-5690: TCA cycle II (plants and fungi)
E1	E3	100	100	70	161	70	161	5513.35	4803.25	0.198918	0.000529173	0.00282041	0.538698		1	1	1	PWY-5695: urate biosynthesis/inosine 5'-phosphate degradation
E1	E3	28.5714	45.3416	70	161	20	73	12.9593	14.1544	-0.127258	0.00704331	0.0242233	1	0.482192	0.019567	0.195286	1	PWY-5705: allantoin degradation to glyoxylate III
E1	E3	35.7143	52.795	70	161	25	85	61.6565	56.4551	0.127149	0.0145544	0.042212	1	0.496732	0.0216148	0.208831	1	PWY-5723: Rubisco shunt
E1	E3	40	47.205	70	161	28	76	11.4309	14.363	-0.329413	0.0811915	0.162703	1	0.745614	0.318795	1	1	PWY-5747: 2-methylcitrate cycle II
E1	E3	50	60.2484	70	161	35	97	14.4688	14.4077	0.00610756	0.118196	0.21221	1	0.659794	0.151834	0.844628	1	PWY-5754: 4-hydroxybenzoate biosynthesis I (eukaryotes)
E1	E3	58.5714	65.2174	70	161	41	105	57.2531	66.7783	-0.222027	0.145478	0.245194	1	0.754023	0.374183	1	1	PWY-5791: 1,4-dihydroxy-2-naphthoate biosynthesis II (plants)
E1	E3	58.5714	65.2174	70	161	41	105	57.2531	66.7783	-0.222027	0.145478	0.245194	1	0.754023	0.374183	1	1	PWY-5837: 1,4-dihydroxy-2-naphthoate biosynthesis I
E1	E3	32.8571	46.5839	70	161	23	75	75.3131	103.787	-0.46265	0.0124713	0.0372311	1	0.561135	0.0602287	0.441099	1	PWY-5838: superpathway of menaquinol-8 biosynthesis I
E1	E3	58.5714	65.2174	70	161	41	105	130.969	177.267	-0.4367	0.0923619	0.177959	1	0.754023	0.374183	1	1	PWY-5840: superpathway of menaquinol-7 biosynthesis
E1	E3	22.8571	39.1304	70	161	16	63	131.916	125.583	0.0709871	0.00945824	0.0302387	1	0.460905	0.0231192	0.210124	1	PWY-5845: superpathway of menaquinol-9 biosynthesis
E1	E3	22.8571	39.1304	70	161	16	63	131.916	125.583	0.0709871	0.00945824	0.0302387	1	0.460905	0.0231192	0.210124	1	PWY-5850: superpathway of menaquinol-6 biosynthesis I
E1	E3	38.5714	44.7205	70	161	27	72	12.0532	23.0872	-0.937681	0.0516046	0.114733	1	0.776163	0.469672	1	1	PWY-5855: ubiquinol-7 biosynthesis (prokaryotic)
E1	E3	38.5714	44.7205	70	161	27	72	12.0532	23.0872	-0.937681	0.0516046	0.114733	1	0.776163	0.469672	1	1	PWY-5856: ubiquinol-9 biosynthesis (prokaryotic)
E1	E3	38.5714	44.7205	70	161	27	72	12.0532	23.0872	-0.937681	0.0516046	0.114733	1	0.776163	0.469672	1	1	PWY-5857: ubiquinol-10 biosynthesis (prokaryotic)
E1	E3	22.8571	39.1304	70	161	16	63	89.1347	86.0086	0.0515051	0.00945824	0.0302387	1	0.460905	0.0231192	0.210124	1	PWY-5860: superpathway of demethylmenaquinol-6 biosynthesis I
E1	E3	32.8571	46.5839	70	161	23	75	50.6559	70.6252	-0.479452	0.012626	0.0373641	1	0.561135	0.0602287	0.441099	1	PWY-5861: superpathway of demethylmenaquinol-8 biosynthesis
E1	E3	22.8571	39.1304	70	161	16	63	89.1347	86.0086	0.0515051	0.00945824	0.0302387	1	0.460905	0.0231192	0.210124	1	PWY-5862: superpathway of demethylmenaquinol-9 biosynthesis
E1	E3	58.5714	65.2174	70	161	41	105	62.336	66.6197	-0.0958832	0.119179	0.213599	1	0.754023	0.374183	1	1	PWY-5863: superpathway of phylloquinol biosynthesis
E1	E3	34.2857	32.9193	70	161	24	53	56.9992	58.2292	-0.0308032	0.437599	0.474921	1	1.06317	0.879779	1	1	PWY-5871: ubiquinol-9 biosynthesis (eukaryotic)
E1	E3	34.2857	32.9193	70	161	24	53	56.9992	58.2292	-0.0308032	0.437599	0.474921	1	1.06317	0.879779	1	1	PWY-5873: ubiquinol-7 biosynthesis (eukaryotic)
E1	E3	22.8571	39.1304	70	161	16	63	131.916	125.583	0.0709871	0.00945824	0.0302387	1	0.460905	0.0231192	0.210124	1	PWY-5896: superpathway of menaquinol-10 biosynthesis
E1	E3	58.5714	65.2174	70	161	41	105	165.123	187.841	-0.18597	0.129544	0.22527	1	0.754023	0.374183	1	1	PWY-5897: superpathway of menaquinol-11 biosynthesis
E1	E3	58.5714	65.2174	70	161	41	105	165.123	187.841	-0.18597	0.129544	0.22527	1	0.754023	0.374183	1	1	PWY-5898: superpathway of menaquinol-12 biosynthesis
E1	E3	58.5714	65.2174	70	161	41	105	165.123	187.841	-0.18597	0.129544	0.22527	1	0.754023	0.374183	1	1	PWY-5899: superpathway of menaquinol-13 biosynthesis
E1	E3	98.5714	100	70	161	69	161	539.08	490.776	0.135436	0.317563	0.397598	1	0	0.30303	1	1	PWY-5913: TCA cycle VI (obligate autotrophs)
E1	E3	97.1429	92.5466	70	161	68	149	166.951	152.582	0.129839	0.0772623	0.156609	1	2.73826	0.237822	1	1	PWY-5918: superpathay of heme biosynthesis from glutamate
E1	E3	45.7143	52.795	70	161	32	85	34.1186	44.161	-0.372211	0.0879881	0.171923	1	0.752941	0.390423	1	1	PWY-5920: superpathway of heme biosynthesis from glycine
E1	E3	100	100	70	161	70	161	1004.67	788.022	0.350415	0.0350447	0.084539	1		1	1	1	PWY-5941: glycogen degradation II (eukaryotic)
E1	E3	95.7143	98.1366	70	161	67	158	280.387	297.531	-0.0856214	0.113058	0.205158	1	0.424051	0.370696	1	1	PWY-5971: palmitate biosynthesis II (bacteria and plants)
E1	E3	100	100	70	161	70	161	3619.07	3077.13	0.23403	0.000256596	0.00149266	0.261215		1	1	1	PWY-5973: cis-vaccenate biosynthesis
E1	E3	100	100	70	161	70	161	816.904	523.914	0.640838	0.0134852	0.0395617	1		1	1	1	PWY-5989: stearate biosynthesis II (bacteria and plants)
E1	E3	95.7143	98.1366	70	161	67	158	280.218	279.012	0.00622456	0.219014	0.315802	1	0.424051	0.370696	1	1	PWY-6113: superpathway of mycolate biosynthesis
E1	E3	100	100	70	161	70	161	7327.33	7068.88	0.0518063	0.0810768	0.162703	1		1	1	1	PWY-6121: 5-aminoimidazole ribonucleotide biosynthesis I
E1	E3	100	100	70	161	70	161	7400.27	7008.69	0.0784334	0.0165636	0.0465793	1		1	1	1	PWY-6122: 5-aminoimidazole ribonucleotide biosynthesis II
E1	E3	100	100	70	161	70	161	2624.79	2117.24	0.310017	1.596e-05	0.000180525	0.0162473		1	1	1	PWY-6123: inosine-5'-phosphate biosynthesis I
E1	E3	100	100	70	161	70	161	2359.67	1878.44	0.329047	1.2253e-05	0.000141745	0.0124735		1	1	1	PWY-6124: inosine-5'-phosphate biosynthesis II
E1	E3	100	100	70	161	70	161	2955.24	2824.91	0.0650707	0.449285	0.479426	1		1	1	1	PWY-6125: superpathway of guanosine nucleotides de novo biosynthesis II
E1	E3	100	100	70	161	70	161	5781.98	5300.47	0.125445	0.00575423	0.0202692	1		1	1	1	PWY-6126: superpathway of adenosine nucleotides de novo biosynthesis II
E1	E3	100	100	70	161	70	161	325.889	330.22	-0.0190472	0.426493	0.46836	1		1	1	1	PWY-6147: 6-hydroxymethyl-dihydropterin diphosphate biosynthesis I
E1	E3	100	100	70	161	70	161	7659.86	6277.39	0.287152	2.14977e-06	3.26637e-05	0.00218847		1	1	1	PWY-6151: S-adenosyl-L-methionine cycle I
E1	E3	100	100	70	161	70	161	7777.24	6516.33	0.255199	3.19886e-06	4.46088e-05	0.00325644		1	1	1	PWY-6163: chorismate biosynthesis from 3-dehydroquinate
E1	E3	21.4286	48.4472	70	161	15	78	64.6067	186.239	-1.5274	5.7728e-06	7.34411e-05	0.00587671	0.29021	0.000129234	0.00476439	0.131561	PWY-6167: flavin biosynthesis II (archaea)
E1	E3	100	100	70	161	70	161	2637.9	2352.65	0.165105	0.0320103	0.0789018	1		1	1	1	PWY-6168: flavin biosynthesis III (fungi)
E1	E3	100	100	70	161	70	161	3033.11	2047.99	0.566592	5.3857e-07	1.03446e-05	0.000548265		1	1	1	PWY-621: sucrose degradation III (sucrose invertase)
E1	E3	28.5714	44.7205	70	161	20	72	23.7343	26.1168	-0.13801	0.00573951	0.0202692	1	0.494444	0.0279134	0.238789	1	PWY-6263: superpathway of menaquinol-8 biosynthesis II
E1	E3	95.7143	98.1366	70	161	67	158	852.543	847.929	0.00783003	0.131719	0.227271	1	0.424051	0.370696	1	1	PWY-6270: isoprene biosynthesis I
E1	E3	100	100	70	161	70	161	7400.27	7008.69	0.0784334	0.0165636	0.0465793	1		1	1	1	PWY-6277: superpathway of 5-aminoimidazole ribonucleotide biosynthesis
E1	E3	97.1429	98.7578	70	161	68	159	235.637	235.823	-0.00113937	0.178753	0.27655	1	0.427673	0.586581	1	1	PWY-6282: palmitoleate biosynthesis I (from (5Z)-dodec-5-enoate)
E1	E3	95.7143	98.1366	70	161	67	158	266.214	245.301	0.118037	0.425232	0.46836	1	0.424051	0.370696	1	1	PWY-6284: superpathway of unsaturated fatty acids biosynthesis (E. coli)
E1	E3	34.2857	47.205	70	161	24	76	142.148	188.16	-0.404568	0.0157746	0.0447389	1	0.583524	0.0830654	0.560004	1	PWY-6285: superpathway of fatty acids biosynthesis (E. coli)
E1	E3	100	100	70	161	70	161	1807.82	1550.66	0.221372	0.00149781	0.00660075	1		1	1	1	PWY-6305: putrescine biosynthesis IV
E1	E3	47.1429	45.9627	70	161	33	74	4.82165	5.41859	-0.16839	0.474918	0.49283	1	1.04858	0.886701	1	1	PWY-6309: L-tryptophan degradation XI (mammalian, via kynurenine)
E1	E3	100	100	70	161	70	161	4219.6	3513.19	0.264327	0.00012394	0.000824644	0.126171		1	1	1	PWY-6317: galactose degradation I (Leloir pathway)
E1	E3	25.7143	41.6149	70	161	18	67	15.9105	19.058	-0.26042	0.0107054	0.033125	1	0.485649	0.0258061	0.226471	1	PWY-6318: L-phenylalanine degradation IV (mammalian, via side chain)
E1	E3	100	100	70	161	70	161	951.479	816.499	0.22072	0.0116102	0.0353867	1		1	1	1	PWY-6353: purine nucleotides degradation II (aerobic)
E1	E3	100	100	70	161	70	161	4578.33	5042.64	-0.139356	0.0386691	0.0919163	1		1	1	1	PWY-6385: peptidoglycan biosynthesis III (mycobacteria)
E1	E3	100	100	70	161	70	161	9310.18	8593.83	0.115508	0.00985253	0.0310522	1		1	1	1	PWY-6386: UDP-N-acetylmuramoyl-pentapeptide biosynthesis II (lysine-containing)
E1	E3	100	100	70	161	70	161	9046.63	8302.1	0.123904	0.00657396	0.0227764	1		1	1	1	PWY-6387: UDP-N-acetylmuramoyl-pentapeptide biosynthesis I (meso-diaminopimelate containing)
E1	E3	88.5714	91.3043	70	161	62	147	40.0694	44.5626	-0.153333	0.121606	0.216424	1	0.738095	0.626041	1	1	PWY-6435: 4-hydroxybenzoate biosynthesis V
E1	E3	70	65.8385	70	161	49	106	139.024	155.891	-0.165207	0.200487	0.298823	1	1.21069	0.647819	1	1	PWY-6471: peptidoglycan biosynthesis IV (Enterococcus faecium)
E1	E3	100	100	70	161	70	161	1269.55	904.741	0.488744	5.15665e-07	1.00951e-05	0.000524947		1	1	1	PWY-6507: 4-deoxy-L-threo-hex-4-enopyranuronate degradation
E1	E3	97.1429	98.7578	70	161	68	159	209.66	224.371	-0.0978378	0.0629227	0.13457	1	0.427673	0.586581	1	1	PWY-6519: 8-amino-7-oxononanoate biosynthesis I
E1	E3	100	100	70	161	70	161	3976.35	3322.89	0.259008	0.00212537	0.0088504	1		1	1	1	PWY-6527: stachyose degradation
E1	E3	91.4286	89.441	70	161	64	144	144.048	100.426	0.520415	0.0278763	0.0709452	1	1.25926	0.812054	1	1	PWY-6531: mannitol cycle
E1	E3	100	100	70	161	70	161	1912.42	1874.86	0.0286168	0.42062	0.465846	1		1	1	1	PWY-6545: pyrimidine deoxyribonucleotides de novo biosynthesis III
E1	E3	100	100	70	161	70	161	363.506	454.401	-0.321989	0.0155322	0.0446661	1		1	1	1	PWY-6549: L-glutamine biosynthesis III
E1	E3	100	99.3789	70	161	70	160	199.52	205.944	-0.045716	0.221237	0.318106	1	inf	1	1	1	PWY-6588: pyruvate fermentation to acetone
E1	E3	100	100	70	161	70	161	374.986	361.935	0.0511087	0.412262	0.45867	1		1	1	1	PWY-6590: superpathway of Clostridium acetobutylicum acidogenic fermentation
E1	E3	100	100	70	161	70	161	346.474	300.75	0.204179	0.202018	0.300226	1		1	1	1	PWY-6595: superpathway of guanosine nucleotides degradation (plants)
E1	E3	100	100	70	161	70	161	488.639	433.629	0.17231	0.131036	0.226925	1		1	1	1	PWY-6606: guanosine nucleotides degradation II
E1	E3	100	100	70	161	70	161	2006.85	1563.39	0.360252	2.37909e-05	0.000230659	0.0242192		1	1	1	PWY-6608: guanosine nucleotides degradation III
E1	E3	100	100	70	161	70	161	2491.64	2257.76	0.142201	0.00781141	0.0264186	1		1	1	1	PWY-6609: adenine and adenosine salvage III
E1	E3	98.5714	98.1366	70	161	69	158	420.775	398.67	0.0778508	0.30507	0.386745	1	1.31013	1	1	1	PWY-6612: superpathway of tetrahydrofolate biosynthesis
E1	E3	58.5714	66.4596	70	161	41	107	139.466	186.116	-0.416289	0.0783733	0.157988	1	0.713503	0.29653	1	1	PWY-6628: superpathway of L-phenylalanine biosynthesis
E1	E3	37.1429	52.795	70	161	26	85	125.165	130.689	-0.0623015	0.0180119	0.0491586	1	0.528342	0.0321436	0.270432	1	PWY-6629: superpathway of L-tryptophan biosynthesis
E1	E3	94.2857	96.8944	70	161	66	156	298.051	268.187	0.15232	0.402282	0.452511	1	0.528846	0.459541	1	1	PWY-6630: superpathway of L-tyrosine biosynthesis
E1	E3	100	100	70	161	70	161	5277.94	4837.58	0.125691	0.000719521	0.00351837	0.732473		1	1	1	PWY-6700: queuosine biosynthesis
E1	E3	100	100	70	161	70	161	3910.6	3593.45	0.122021	0.0198095	0.0532086	1		1	1	1	PWY-6703: preQ0 biosynthesis
E1	E3	38.5714	44.7205	70	161	27	72	12.0532	23.0872	-0.937681	0.0516046	0.114733	1	0.776163	0.469672	1	1	PWY-6708: ubiquinol-8 biosynthesis (prokaryotic)
E1	E3	100	100	70	161	70	161	10551.4	9727.44	0.117306	0.003788	0.0142822	1		1	1	1	PWY-6737: starch degradation V
E1	E3	35.7143	52.795	70	161	25	85	20.6687	29.3877	-0.50777	0.00873935	0.0288016	1	0.496732	0.0216148	0.208831	1	PWY-6803: phosphatidylcholine acyl editing
E1	E3	20	36.646	70	161	14	59	11.838	11.042	0.100416	0.00754218	0.0256787	1	0.432203	0.0137269	0.144061	1	PWY-6823: molybdenum cofactor biosynthesis
E1	E3	40	48.4472	70	161	28	78	7.43612	12.3887	-0.736399	0.047601	0.107784	1	0.709402	0.253307	1	1	PWY-6837: fatty acid beta-oxidation V (unsaturated, odd number, di-isomerase-dependent)
E1	E3	54.2857	70.1863	70	161	38	113	37.2221	107.88	-1.5352	4.03821e-05	0.000342575	0.041109	0.504425	0.0240639	0.213018	1	PWY-6859: all-trans-farnesol biosynthesis
E1	E3	30	40.9938	70	161	21	66	15.9185	18.24	-0.1964	0.0617062	0.132805	1	0.616883	0.139603	0.812008	1	PWY-6891: thiazole biosynthesis II (Bacillus)
E1	E3	100	100	70	161	70	161	111.025	89.7439	0.307004	0.00213977	0.0088504	1		1	1	1	PWY-6892: thiazole biosynthesis I (E. coli)
E1	E3	30	40.9938	70	161	21	66	78.6521	88.8218	-0.175428	0.060222	0.130438	1	0.616883	0.139603	0.812008	1	PWY-6895: superpathway of thiamin diphosphate biosynthesis II
E1	E3	100	100	70	161	70	161	3138.46	2642.62	0.248088	9.38062e-05	0.000649624	0.0954947		1	1	1	PWY-6897: thiamin salvage II
E1	E3	100	100	70	161	70	161	577.279	585.498	-0.0203964	0.473099	0.491443	1		1	1	1	PWY-6901: superpathway of glucose and xylose degradation
E1	E3	100	100	70	161	70	161	2056.61	2017.94	0.0273892	0.214926	0.311673	1		1	1	1	PWY-6936: seleno-amino acid biosynthesis
E1	E3	100	100	70	161	70	161	1176.44	1097.17	0.100639	0.282574	0.369743	1		1	1	1	PWY-6969: TCA cycle V (2-oxoglutarate:ferredoxin oxidoreductase)
E1	E3	100	99.3789	70	161	70	160	260.216	269.141	-0.0486532	0.488464	0.494692	1	inf	1	1	1	PWY-7003: glycerol degradation to butanol
E1	E3	21.4286	23.6025	70	161	15	38	20.2551	38.405	-0.92301	0.292247	0.375167	1	0.882775	0.864941	1	1	PWY-7013: L-1,2-propanediol degradation
E1	E3	31.4286	45.9627	70	161	22	74	9.02323	8.5235	0.0821985	0.0243083	0.063778	1	0.538851	0.0429287	0.338771	1	PWY-7094: fatty acid salvage
E1	E3	100	100	70	161	70	161	8339.69	7298.96	0.192303	8.837e-05	0.000620419	0.0899607		1	1	1	PWY-7111: pyruvate fermentation to isobutanol (engineered)
E1	E3	98.5714	100	70	161	69	161	114.775	98.8356	0.215703	0.0580457	0.125993	1	0	0.30303	1	1	PWY-7115: C4 photosynthetic carbon assimilation cycle, NAD-ME type
E1	E3	98.5714	100	70	161	69	161	769.346	677.314	0.183807	0.191333	0.290278	1	0	0.30303	1	1	PWY-7117: C4 photosynthetic carbon assimilation cycle, PEPCK type
E1	E3	100	100	70	161	70	161	2158.01	2189.36	-0.0208038	0.208721	0.306109	1		1	1	1	PWY-7184: pyrimidine deoxyribonucleotides de novo biosynthesis I
E1	E3	100	100	70	161	70	161	2863.51	2762.79	0.0516575	0.46543	0.487906	1		1	1	1	PWY-7187: pyrimidine deoxyribonucleotides de novo biosynthesis II
E1	E3	100	100	70	161	70	161	1680.57	1522.47	0.142538	0.0435734	0.101	1		1	1	1	PWY-7196: superpathway of pyrimidine ribonucleosides salvage
E1	E3	100	100	70	161	70	161	1504.24	1587.68	-0.07789	0.156736	0.257351	1		1	1	1	PWY-7197: pyrimidine deoxyribonucleotide phosphorylation
E1	E3	100	100	70	161	70	161	425.295	296.82	0.518873	0.000307965	0.00175144	0.313508		1	1	1	PWY-7198: pyrimidine deoxyribonucleotides de novo biosynthesis IV
E1	E3	100	100	70	161	70	161	1615.91	1406.8	0.199929	0.00306169	0.0119418	1		1	1	1	PWY-7199: pyrimidine deoxyribonucleosides salvage
E1	E3	34.2857	50.3106	70	161	24	81	36.7311	41.557	-0.178089	0.00947558	0.0302387	1	0.515298	0.0308604	0.261799	1	PWY-7204: pyridoxal 5'-phosphate salvage II (plants)
E1	E3	100	100	70	161	70	161	2349.39	2359.58	-0.00624188	0.484193	0.494392	1		1	1	1	PWY-7208: superpathway of pyrimidine nucleobases salvage
E1	E3	85.7143	86.9565	70	161	60	140	95.3994	86.2228	0.14591	0.450073	0.479763	1	0.9	0.834733	1	1	PWY-7209: superpathway of pyrimidine ribonucleosides degradation
E1	E3	100	100	70	161	70	161	540.678	391.365	0.466256	0.000678034	0.00336708	0.690239		1	1	1	PWY-7210: pyrimidine deoxyribonucleotides biosynthesis from CTP
E1	E3	100	100	70	161	70	161	1648.62	1691.96	-0.0374362	0.394018	0.448791	1		1	1	1	PWY-7211: superpathway of pyrimidine deoxyribonucleotides de novo biosynthesis
E1	E3	100	100	70	161	70	161	11742.4	11124.6	0.0779724	0.0577975	0.125722	1		1	1	1	PWY-7219: adenosine ribonucleotides de novo biosynthesis
E1	E3	100	100	70	161	70	161	3493.98	3201.45	0.126147	0.0024145	0.00963908	1		1	1	1	PWY-7220: adenosine deoxyribonucleotides de novo biosynthesis II
E1	E3	100	100	70	161	70	161	8887.41	7854.98	0.178156	0.00225817	0.00919528	1		1	1	1	PWY-7221: guanosine ribonucleotides de novo biosynthesis
E1	E3	100	100	70	161	70	161	3493.98	3201.45	0.126147	0.0024145	0.00963908	1		1	1	1	PWY-7222: guanosine deoxyribonucleotides de novo biosynthesis II
E1	E3	100	100	70	161	70	161	2944.89	2978.77	-0.0165057	0.329879	0.406066	1		1	1	1	PWY-7228: superpathway of guanosine nucleotides de novo biosynthesis I
E1	E3	100	100	70	161	70	161	6793.54	6359.24	0.0953083	0.0149564	0.0432378	1		1	1	1	PWY-7229: superpathway of adenosine nucleotides de novo biosynthesis I
E1	E3	100	100	70	161	70	161	1420.85	1441.53	-0.0208505	0.182698	0.2801	1		1	1	1	PWY-7234: inosine-5'-phosphate biosynthesis III
E1	E3	40	46.5839	70	161	28	75	61.1209	78.0405	-0.352556	0.135282	0.23263	1	0.764444	0.389439	1	1	PWY-7235: superpathway of ubiquinol-6 biosynthesis (eukaryotic)
E1	E3	100	100	70	161	70	161	464.548	354.31	0.390818	0.00179282	0.0077008	1		1	1	1	PWY-7237: myo-, chiro- and scillo-inositol degradation
E1	E3	100	100	70	161	70	161	1427.81	1038.84	0.45884	2.84799e-07	6.04939e-06	0.000289926		1	1	1	PWY-7242: D-fructuronate degradation
E1	E3	100	100	70	161	70	161	5195.23	4835.62	0.103488	0.0470433	0.106897	1		1	1	1	PWY-724: superpathway of L-lysine, L-threonine and L-methionine biosynthesis II
E1	E3	24.2857	46.5839	70	161	17	75	86.3199	47.5444	0.860417	0.00258174	0.0101869	1	0.367799	0.00200527	0.0287517	1	PWY-7254: TCA cycle VII (acetate-producers)
E1	E3	22.8571	40.3727	70	161	16	65	14.7247	13.3245	0.144156	0.00518914	0.0186005	1	0.437607	0.0109379	0.117208	1	PWY-7269: NAD/NADP-NADH/NADPH mitochondrial interconversion (yeast)
E1	E3	100	100	70	161	70	161	2176.47	2081.42	0.064422	0.33924	0.410831	1		1	1	1	PWY-7282: 4-amino-2-methyl-5-phosphomethylpyrimidine biosynthesis (yeast)
E1	E3	24.2857	47.205	70	161	17	76	26.4553	97.0265	-1.87482	2.83509e-05	0.000262375	0.0288612	0.358739	0.00125573	0.0220402	1	PWY-7286: 7-(3-amino-3-carboxypropyl)-wyosine biosynthesis
E1	E3	34.2857	50.9317	70	161	24	82	10.3944	12.8994	-0.311502	0.00726486	0.0248572	1	0.502651	0.0219045	0.208831	1	PWY-7315: dTDP-N-acetylthomosamine biosynthesis
E1	E3	97.1429	99.3789	70	161	68	160	409.962	417.049	-0.0247248	0.333767	0.407892	1	0.2125	0.218738	0.972714	1	PWY-7323: superpathway of GDP-mannose-derived O-antigen building blocks biosynthesis
E1	E3	84.2857	96.2733	70	161	59	155	138.728	137.052	0.0175366	0.0476451	0.107784	1	0.207625	0.00413291	0.0496112	1	PWY-7328: superpathway of UDP-glucose-derived O-antigen building blocks biosynthesis
E1	E3	100	100	70	161	70	161	3356.11	2723.61	0.301268	3.95119e-06	5.22378e-05	0.00402231		1	1	1	PWY-7357: thiamin formation from pyrithiamine and oxythiamine (yeast)
E1	E3	81.4286	98.7578	70	161	57	159	100.719	116.002	-0.203804	0.00426851	0.0158589	1	0.0551524	4.70256e-06	0.00110716	0.00478721	PWY-7371: 1,4-dihydroxy-6-naphthoate biosynthesis II
E1	E3	100	100	70	161	70	161	1233.56	1786.33	-0.534175	5.55385e-08	1.76682e-06	5.65382e-05		1	1	1	PWY-7383: anaerobic energy metabolism (invertebrates, cytosol)
E1	E3	97.1429	98.7578	70	161	68	159	145.612	161.41	-0.148602	0.0763581	0.155681	1	0.427673	0.586581	1	1	PWY-7388: octanoyl-[acyl-carrier protein] biosynthesis (mitochondria, yeast)
E1	E3	54.2857	70.1863	70	161	38	113	97.3341	203.078	-1.06102	7.69881e-05	0.000562229	0.0783739	0.504425	0.0240639	0.213018	1	PWY-7392: taxadiene biosynthesis (engineered)
E1	E3	100	100	70	161	70	161	2271.22	1734.79	0.388709	0.00496462	0.0180407	1		1	1	1	PWY-7400: L-arginine biosynthesis IV (archaebacteria)
E1	E3	20	34.1615	70	161	14	55	12.3912	13.2316	-0.0946735	0.01672	0.0467713	1	0.481818	0.0414068	0.329313	1	PWY-7409: phospholipid remodeling (phosphatidylethanolamine, yeast)
E1	E3	97.1429	100	70	161	68	161	956.36	883.968	0.11356	0.394018	0.448791	1	0	0.0909091	0.597067	1	PWY-7456: mannan degradation
E1	E3	100	100	70	161	70	161	282.203	287.619	-0.027428	0.404773	0.452765	1		1	1	1	PWY-7539: 6-hydroxymethyl-dihydropterin diphosphate biosynthesis III (Chlamydia)
E1	E3	100	99.3789	70	161	70	160	711.994	750.261	-0.0755268	0.21181	0.308473	1	inf	1	1	1	PWY-7560: methylerythritol phosphate pathway II
E1	E3	100	100	70	161	70	161	3138.61	2706.39	0.213755	0.00110555	0.00513906	1		1	1	1	PWY-7663: gondoate biosynthesis (anaerobic)
E1	E3	97.1429	98.7578	70	161	68	159	212.428	231.665	-0.125066	0.0856755	0.1687	1	0.427673	0.586581	1	1	PWY-7664: oleate biosynthesis IV (anaerobic)
E1	E3	85.7143	92.5466	70	161	60	149	124.611	191.418	-0.619288	0.000156758	0.000985062	0.15958	0.483221	0.141431	0.812008	1	PWY-821: superpathway of sulfur amino acid biosynthesis (Saccharomyces cerevisiae)
E1	E3	100	100	70	161	70	161	3371.37	3038.82	0.149823	0.0460005	0.105233	1		1	1	1	PWY-841: superpathway of purine nucleotides de novo biosynthesis I
E1	E3	24.2857	26.7081	70	161	17	43	25.0983	27.5297	-0.133398	0.330814	0.406235	1	0.880211	0.746397	1	1	PWY-922: mevalonate pathway I
E1	E3	100	100	70	161	70	161	122.978	110.482	0.15459	0.129674	0.22527	1		1	1	1	PWY0-1061: superpathway of L-alanine biosynthesis
E1	E3	35.7143	44.0994	70	161	25	71	13.2507	16.5438	-0.320224	0.0670911	0.141699	1	0.704225	0.248744	1	1	PWY0-1241: ADP-L-glycero-&beta;-D-manno-heptose biosynthesis
E1	E3	97.1429	96.8944	70	161	68	156	613.588	586.057	0.0662291	0.447589	0.479426	1	1.08974	1	1	1	PWY0-1261: anhydromuropeptides recycling
E1	E3	100	100	70	161	70	161	5611.85	5371	0.063285	0.10682	0.195933	1		1	1	1	PWY0-1296: purine ribonucleosides degradation
E1	E3	100	100	70	161	70	161	456.626	479.052	-0.0691676	0.268268	0.359158	1		1	1	1	PWY0-1297: superpathway of purine deoxyribonucleosides degradation
E1	E3	100	100	70	161	70	161	323.367	313.601	0.0442432	0.0427878	0.100015	1		1	1	1	PWY0-1298: superpathway of pyrimidine deoxyribonucleosides degradation
E1	E3	100	100	70	161	70	161	6968.47	6074.84	0.197997	0.000213307	0.00128489	0.217147		1	1	1	PWY0-1319: CDP-diacylglycerol biosynthesis II
E1	E3	21.4286	39.1304	70	161	15	63	14.8624	8.88242	0.74264	0.00873024	0.0288016	1	0.424242	0.00999465	0.10824	1	PWY0-1338: polymyxin resistance
E1	E3	48.5714	56.5217	70	161	34	91	28.4486	35.6987	-0.327514	0.072221	0.14913	1	0.726496	0.314864	1	1	PWY0-1415: superpathway of heme biosynthesis from uroporphyrinogen-III
E1	E3	92.8571	90.0621	70	161	65	145	221.754	147.781	0.585501	3.25232e-05	0.000290427	0.0331086	1.43448	0.622295	1	1	PWY0-1479: tRNA processing
E1	E3	31.4286	42.236	70	161	22	68	4.23561	4.80121	-0.18083	0.0436543	0.101	1	0.626838	0.142779	0.812008	1	PWY0-1533: methylphosphonate degradation I
E1	E3	100	100	70	161	70	161	2006.12	2326.65	-0.213846	0.00665337	0.0229598	1		1	1	1	PWY0-1586: peptidoglycan maturation (meso-diaminopimelate containing)
E1	E3	100	100	70	161	70	161	2294.97	2338.71	-0.0272426	0.12609	0.222141	1		1	1	1	PWY0-162: superpathway of pyrimidine ribonucleotides de novo biosynthesis
E1	E3	100	100	70	161	70	161	2966.27	2890.43	0.0373658	0.218068	0.315332	1		1	1	1	PWY0-166: superpathway of pyrimidine deoxyribonucleotides de novo biosynthesis (E. coli)
E1	E3	24.2857	37.2671	70	161	17	60	8.56562	10.052	-0.230858	0.0216886	0.0574974	1	0.539937	0.0681751	0.492215	1	PWY0-41: allantoin degradation IV (anaerobic)
E1	E3	32.8571	45.9627	70	161	23	74	10.9496	16.9146	-0.627385	0.0117918	0.0357263	1	0.575331	0.081498	0.560004	1	PWY0-42: 2-methylcitrate cycle I
E1	E3	100	100	70	161	70	161	1312.09	1205.3	0.122483	0.394843	0.448791	1		1	1	1	PWY0-781: aspartate superpathway
E1	E3	100	100	70	161	70	161	1718.9	2073.27	-0.270429	0.00233515	0.00947086	1		1	1	1	PWY0-845: superpathway of pyridoxal 5'-phosphate biosynthesis and salvage
E1	E3	97.1429	98.7578	70	161	68	159	185.011	201.753	-0.124978	0.0823709	0.164097	1	0.427673	0.586581	1	1	PWY0-862: (5Z)-dodec-5-enoate biosynthesis
E1	E3	24.2857	31.677	70	161	17	51	28.395	41.5287	-0.54847	0.0752591	0.153843	1	0.691824	0.276001	1	1	PWY0-881: superpathway of fatty acid biosynthesis I (E. coli)
E1	E3	74.2857	68.323	70	161	52	110	42.3832	21.2755	0.9943	0.00212684	0.0088504	1	1.33939	0.434819	1	1	PWY490-3: nitrate reduction VI (assimilatory)
E1	E3	100	100	70	161	70	161	706.135	654.609	0.109311	0.0560831	0.122254	1		1	1	1	PWY4FS-7: phosphatidylglycerol biosynthesis I (plastidic)
E1	E3	100	100	70	161	70	161	706.135	654.609	0.109311	0.0560831	0.122254	1		1	1	1	PWY4FS-8: phosphatidylglycerol biosynthesis II (non-plastidic)
E1	E3	100	100	70	161	70	161	294.788	308.692	-0.0664925	0.104861	0.194168	1		1	1	1	PWY4LZ-257: superpathway of fermentation (Chlamydomonas reinhardtii)
E1	E3	38.5714	47.8261	70	161	27	77	9.71805	9.92168	-0.0299166	0.0773813	0.156609	1	0.684989	0.199652	0.949748	1	PWY66-389: phytol degradation
E1	E3	78.5714	86.3354	70	161	55	139	108.519	98.8197	0.135081	0.245718	0.339404	1	0.580336	0.171511	0.893119	1	PWY66-398: TCA cycle III (animals)
E1	E3	100	100	70	161	70	161	554.149	643.542	-0.21576	0.00727646	0.0248572	1		1	1	1	PWY66-399: gluconeogenesis III
E1	E3	100	100	70	161	70	161	659.523	582.878	0.17823	0.320624	0.399504	1		1	1	1	PWY66-400: glycolysis VI (metazoan)
E1	E3	100	98.7578	70	161	70	159	842.155	819.133	0.0399882	0.0132647	0.0390272	1	inf	1	1	1	PWY66-409: superpathway of purine nucleotide salvage
E1	E3	100	100	70	161	70	161	4219.6	3513.19	0.264327	0.00012394	0.000824644	0.126171		1	1	1	PWY66-422: D-galactose degradation V (Leloir pathway)
E1	E3	97.1429	98.7578	70	161	68	159	220.093	240.731	-0.129312	0.0877053	0.1717	1	0.427673	0.586581	1	1	PWYG-321: mycolate biosynthesis
E1	E3	92.8571	88.1988	70	161	65	142	359.293	363.059	-0.0150425	0.105318	0.194228	1	1.73944	0.353476	1	1	PYRIDNUCSAL-PWY: NAD salvage pathway I
E1	E3	100	100	70	161	70	161	2684.79	2707.11	-0.0119434	0.401456	0.452188	1		1	1	1	PYRIDNUCSYN-PWY: NAD biosynthesis I (from aspartate)
E1	E3	100	100	70	161	70	161	1324.09	1673.43	-0.337802	0.00137721	0.00617619	1		1	1	1	PYRIDOXSYN-PWY: pyridoxal 5'-phosphate biosynthesis I
E1	E3	51.4286	57.764	70	161	36	93	30.6708	38.7981	-0.339117	0.0818478	0.163696	1	0.774194	0.390169	1	1	REDCITCYC: TCA cycle VIII (helicobacter)
E1	E3	100	100	70	161	70	161	1482.05	1206.29	0.297019	0.000198305	0.00122348	0.201875		1	1	1	RHAMCAT-PWY: L-rhamnose degradation I
E1	E3	100	100	70	161	70	161	1133.59	1332.3	-0.233013	0.0449763	0.103354	1		1	1	1	RIBOSYN2-PWY: flavin biosynthesis I (bacteria and plants)
E1	E3	51.4286	65.2174	70	161	36	105	36.8844	34.6465	0.090303	0.0609149	0.131659	1	0.564706	0.0567275	0.427768	1	RUMP-PWY: formaldehyde oxidation I
E1	E3	100	100	70	161	70	161	1795.4	1386.39	0.372971	1.75254e-05	0.000190043	0.0178409		1	1	1	SALVADEHYPOX-PWY: adenosine nucleotides degradation II
E1	E3	100	100	70	161	70	161	2461.5	2118.38	0.216575	0.000346459	0.00189621	0.352695		1	1	1	SER-GLYSYN-PWY: superpathway of L-serine and glycine biosynthesis I
E1	E3	95.7143	100	70	161	67	161	217.512	334.942	-0.622818	0.000610694	0.00318814	0.621687	0	0.0269948	0.232888	1	SO4ASSIM-PWY: sulfate reduction I (assimilatory)
E1	E3	95.7143	100	70	161	67	161	415.086	515.097	-0.311436	0.00499545	0.0180407	1	0	0.0269948	0.232888	1	SULFATE-CYS-PWY: superpathway of sulfate assimilation and cysteine biosynthesis
E1	E3	42.8571	54.6584	70	161	30	88	37.6114	56.6596	-0.591152	0.0244939	0.0639353	1	0.622159	0.115748	0.693127	1	TCA-GLYOX-BYPASS: superpathway of glyoxylate bypass and TCA
E1	E3	100	100	70	161	70	161	1218.92	1170.08	0.0590009	0.265451	0.356503	1		1	1	1	TCA: TCA cycle I (prokaryotic)
E1	E3	30	31.0559	70	161	21	50	13.3524	16.4088	-0.297366	0.430282	0.470997	1	0.951429	1	1	1	TEICHOICACID-PWY: teichoic acid (poly-glycerol) biosynthesis
E1	E3	100	100	70	161	70	161	489.428	400.928	0.287753	0.00213977	0.0088504	1		1	1	1	THISYN-PWY: superpathway of thiamin diphosphate biosynthesis I
E1	E3	100	100	70	161	70	161	1710.1	1439.41	0.248601	0.000322858	0.00182594	0.32867		1	1	1	THISYNARA-PWY: superpathway of thiamin diphosphate biosynthesis III (eukaryotes)
E1	E3	100	100	70	161	70	161	3401.04	3194.97	0.0901737	0.0511798	0.114733	1		1	1	1	THRESYN-PWY: superpathway of L-threonine biosynthesis
E1	E3	100	100	70	161	70	161	7798.27	7763.38	0.00646918	0.386619	0.446234	1		1	1	1	TRNA-CHARGING-PWY: tRNA charging
E1	E3	100	100	70	161	70	161	2762.8	2239.06	0.303242	0.00085218	0.00403763	0.867519		1	1	1	TRPSYN-PWY: L-tryptophan biosynthesis
E1	E3	24.2857	36.646	70	161	17	59	12.5801	21.129	-0.74809	0.0183668	0.0498597	1	0.554525	0.0696735	0.495997	1	UBISYN-PWY: superpathway of ubiquinol-8 biosynthesis (prokaryotic)
E1	E3	98.5714	98.1366	70	161	69	158	596.335	568.454	0.0690798	0.193382	0.292751	1	1.31013	1	1	1	UDPNAGSYN-PWY: UDP-N-acetyl-D-glucosamine biosynthesis I
E1	E3	100	100	70	161	70	161	8339.69	7298.96	0.192303	8.837e-05	0.000620419	0.0899607		1	1	1	VALSYN-PWY: L-valine biosynthesis
E21+E22	E1	100	100	544	70	544	70	2819.99	2857.8	-0.0192168	0.285259	0.370932	1		1	1	1	1CMET2-PWY: N10-formyl-tetrahydrofolate biosynthesis
E21+E22	E1	100	100	544	70	544	70	2332.34	2283.52	0.0305158	0.440396	0.47588	1		1	1	1	ANAEROFRUCAT-PWY: homolactic fermentation
E21+E22	E1	100	100	544	70	544	70	4864.44	4894.39	-0.00885497	0.492718	0.49515	1		1	1	1	ANAGLYCOLYSIS-PWY: glycolysis III (from glucose)
E21+E22	E1	100	100	544	70	544	70	734.49	732.62	0.0036778	0.463356	0.486285	1		1	1	1	ARG+POLYAMINE-SYN: superpathway of arginine and polyamine biosynthesis
E21+E22	E1	100	98.5714	544	70	544	69	560.622	611.198	-0.124612	0.288428	0.372258	1	inf	0.114007	0.690825	1	ARGININE-SYN4-PWY: L-ornithine de novo biosynthesis
E21+E22	E1	43.3824	41.4286	544	70	236	29	26.5745	32.4643	-0.288811	0.47016	0.490392	1	1.0833	0.798578	1	1	ARGORNPROST-PWY: arginine, ornithine and proline interconversion
E21+E22	E1	100	100	544	70	544	70	1746.01	2038.29	-0.223297	0.102513	0.191483	1		1	1	1	ARGSYN-PWY: L-arginine biosynthesis I (via L-ornithine)
E21+E22	E1	100	100	544	70	544	70	749.149	850.313	-0.182742	0.0828448	0.164398	1		1	1	1	ARGSYNBSUB-PWY: L-arginine biosynthesis II (acetyl cycle)
E21+E22	E1	100	100	544	70	544	70	7503.09	7657.52	-0.0293912	0.120567	0.215328	1		1	1	1	ARO-PWY: chorismate biosynthesis I
E21+E22	E1	100	100	544	70	544	70	1663.02	1654.53	0.00738353	0.461934	0.485794	1		1	1	1	ASPASN-PWY: superpathway of L-aspartate and L-asparagine biosynthesis
E21+E22	E1	22.9779	25.7143	544	70	125	18	15.0971	18.4113	-0.286319	0.308151	0.389203	1	0.86184	0.652315	1	1	AST-PWY: L-arginine degradation II (AST pathway)
E21+E22	E1	99.0809	97.1429	544	70	539	68	265.786	260.812	0.0272593	0.158049	0.259088	1	3.17059	0.184735	0.895525	1	BIOTIN-BIOSYNTHESIS-PWY: biotin biosynthesis I
E21+E22	E1	100	100	544	70	544	70	5112.26	5241.17	-0.0359277	0.339137	0.410831	1		1	1	1	BRANCHED-CHAIN-AA-SYN-PWY: superpathway of branched amino acid biosynthesis
E21+E22	E1	100	100	544	70	544	70	6262.74	6709.71	-0.0994577	0.0974887	0.184811	1		1	1	1	CALVIN-PWY: Calvin-Benson-Bassham cycle
E21+E22	E1	99.4485	100	544	70	541	70	315.718	303.135	0.0586755	0.121287	0.216235	1	0	1	1	1	CENTFERM-PWY: pyruvate fermentation to butanoate
E21+E22	E1	100	100	544	70	544	70	403.794	374.152	0.109996	0.228626	0.322661	1		1	1	1	CITRULBIO-PWY: L-citrulline biosynthesis
E21+E22	E1	100	100	544	70	544	70	7407.6	7469.44	-0.0119951	0.378163	0.440527	1		1	1	1	COA-PWY-1: coenzyme A biosynthesis II (mammalian)
E21+E22	E1	100	100	544	70	544	70	2211.34	2231.77	-0.0132688	0.451431	0.480678	1		1	1	1	COA-PWY: coenzyme A biosynthesis I
E21+E22	E1	100	100	544	70	544	70	1700.35	1773.48	-0.0607524	0.275136	0.363751	1		1	1	1	COBALSYN-PWY: adenosylcobalamin salvage from cobinamide I
E21+E22	E1	99.2647	97.1429	544	70	540	68	593.855	597.506	-0.0088426	0.361143	0.427492	1	3.97059	0.142095	0.812008	1	COLANSYN-PWY: colanic acid building blocks biosynthesis
E21+E22	E1	100	100	544	70	544	70	7136.77	7391.34	-0.0505646	0.116171	0.208944	1		1	1	1	COMPLETE-ARO-PWY: superpathway of aromatic amino acid biosynthesis
E21+E22	E1	92.4632	87.1429	544	70	503	61	99.8924	86.9428	0.200309	0.152434	0.251504	1	1.81008	0.158687	0.863867	1	CRNFORCAT-PWY: creatinine degradation I
E21+E22	E1	100	100	544	70	544	70	947.261	1031.74	-0.123248	0.197056	0.296129	1		1	1	1	DAPLYSINESYN-PWY: L-lysine biosynthesis I
E21+E22	E1	100	100	544	70	544	70	3139.98	3206.6	-0.0302877	0.487294	0.494692	1		1	1	1	DENOVOPURINE2-PWY: superpathway of purine nucleotides de novo biosynthesis II
E21+E22	E1	100	100	544	70	544	70	4550.9	4523.53	0.00870523	0.483584	0.494392	1		1	1	1	DTDPRHAMSYN-PWY: dTDP-L-rhamnose biosynthesis I
E21+E22	E1	25.3676	30	544	70	138	21	112.201	95.3058	0.235455	0.223109	0.319192	1	0.793103	0.388841	1	1	ENTBACSYN-PWY: enterobactin biosynthesis
E21+E22	E1	97.2426	97.1429	544	70	529	68	158.477	153.797	0.0432463	0.218992	0.315802	1	1.03725	1	1	1	FAO-PWY: fatty acid &beta;-oxidation I
E21+E22	E1	99.0809	97.1429	544	70	539	68	251.056	237.441	0.0804385	0.167739	0.265401	1	3.17059	0.184735	0.895525	1	FASYN-ELONG-PWY: fatty acid elongation -- saturated
E21+E22	E1	99.0809	97.1429	544	70	539	68	162.855	156.467	0.0577303	0.171174	0.268084	1	3.17059	0.184735	0.895525	1	FASYN-INITIAL-PWY: superpathway of fatty acid biosynthesis initiation (E. coli)
E21+E22	E1	99.8162	98.5714	544	70	543	69	792.644	865.243	-0.126433	0.0919959	0.177754	1	7.86957	0.21518	0.972714	1	FERMENTATION-PWY: mixed acid fermentation
E21+E22	E1	99.0809	98.5714	544	70	539	69	528.407	551.246	-0.0610471	0.346108	0.415004	1	1.56232	0.51782	1	1	FOLSYN-PWY: superpathway of tetrahydrofolate biosynthesis and salvage
E21+E22	E1	91.9118	92.8571	544	70	500	65	73.6866	81.7195	-0.149277	0.371889	0.43614	1	0.874126	1	1	1	FUC-RHAMCAT-PWY: superpathway of fucose and rhamnose degradation
E21+E22	E1	97.9779	97.1429	544	70	533	68	172.832	165.845	0.0595337	0.208572	0.306109	1	1.42513	0.651243	1	1	FUCCAT-PWY: fucose degradation
E21+E22	E1	100	100	544	70	544	70	1728.33	1728.47	-0.000117155	0.164704	0.265299	1		1	1	1	GALACT-GLUCUROCAT-PWY: superpathway of hexuronide and hexuronate degradation
E21+E22	E1	39.7059	37.1429	544	70	216	26	14.1792	15.0957	-0.0903627	0.392055	0.448518	1	1.11445	0.699195	1	1	GALACTARDEG-PWY: D-galactarate degradation I
E21+E22	E1	100	100	544	70	544	70	1536.62	1605.31	-0.0630865	0.247676	0.341184	1		1	1	1	GALACTUROCAT-PWY: D-galacturonate degradation I
E21+E22	E1	100	100	544	70	544	70	1383.51	1490.65	-0.107614	0.102513	0.191483	1		1	1	1	GLCMANNANAUT-PWY: superpathway of N-acetylglucosamine, N-acetylmannosamine and N-acetylneuraminate degradation
E21+E22	E1	40.4412	37.1429	544	70	220	26	14.6307	16.868	-0.20529	0.378012	0.440527	1	1.1491	0.697715	1	1	GLUCARDEG-PWY: D-glucarate degradation I
E21+E22	E1	39.7059	37.1429	544	70	216	26	14.1792	15.0957	-0.0903627	0.392055	0.448518	1	1.11445	0.699195	1	1	GLUCARGALACTSUPER-PWY: superpathway of D-glucarate and D-galactarate degradation
E21+E22	E1	100	100	544	70	544	70	486.949	484.532	0.00717756	0.127902	0.224103	1		1	1	1	GLUCONEO-PWY: gluconeogenesis I
E21+E22	E1	51.4706	50	544	70	280	35	22.4291	26.877	-0.261003	0.317823	0.397598	1	1.06061	0.899036	1	1	GLUCOSE1PMETAB-PWY: glucose and glucose-1-phosphate degradation
E21+E22	E1	100	100	544	70	544	70	1718.58	1713.83	0.0039982	0.0999778	0.188128	1		1	1	1	GLUCUROCAT-PWY: superpathway of &beta;-D-glucuronide and D-glucuronate degradation
E21+E22	E1	72.4265	55.7143	544	70	394	39	58.5126	48.1122	0.282345	0.0214691	0.057064	1	2.08786	0.0052292	0.0604923	1	GLUDEG-I-PWY: GABA shunt
E21+E22	E1	100	100	544	70	544	70	442.652	525.403	-0.247253	0.0777242	0.156991	1		1	1	1	GLUTORN-PWY: L-ornithine biosynthesis
E21+E22	E1	99.4485	97.1429	544	70	541	68	256.996	294.948	-0.198713	0.274181	0.36296	1	5.30392	0.102088	0.629849	1	GLYCOCAT-PWY: glycogen degradation I (bacterial)
E21+E22	E1	100	100	544	70	544	70	2114.72	2268.67	-0.101382	0.295804	0.378302	1		1	1	1	GLYCOGENSYNTH-PWY: glycogen biosynthesis I (from ADP-D-Glucose)
E21+E22	E1	47.2426	54.2857	544	70	257	38	13.3961	15.8242	-0.240326	0.107306	0.19647	1	0.75408	0.309559	1	1	GLYCOL-GLYOXDEG-PWY: superpathway of glycol metabolism and degradation
E21+E22	E1	100	100	544	70	544	70	401.215	427.435	-0.0913294	0.125522	0.222103	1		1	1	1	GLYCOLYSIS-E-D: superpathway of glycolysis and Entner-Doudoroff
E21+E22	E1	39.8897	42.8571	544	70	217	30	75.1943	66.6197	0.174675	0.322002	0.400113	1	0.884811	0.697974	1	1	GLYCOLYSIS-TCA-GLYOX-BYPASS: superpathway of glycolysis, pyruvate dehydrogenase, TCA, and glyoxylate bypass
E21+E22	E1	100	100	544	70	544	70	1314.59	1232.42	0.0931104	0.439549	0.47588	1		1	1	1	GLYCOLYSIS: glycolysis I (from glucose 6-phosphate)
E21+E22	E1	53.4926	58.5714	544	70	291	41	28.6871	28.45	0.0119722	0.181633	0.278888	1	0.813554	0.446869	1	1	GLYOXYLATE-BYPASS: glyoxylate cycle
E21+E22	E1	100	100	544	70	544	70	209.615	219.811	-0.0685237	0.285502	0.370932	1		1	1	1	GOLPDLCAT-PWY: superpathway of glycerol degradation to 1,3-propanediol
E21+E22	E1	95.7721	97.1429	544	70	521	68	73.6056	84.4593	-0.198441	0.106395	0.19586	1	0.66624	1	1	1	HEME-BIOSYNTHESIS-II: heme biosynthesis I (aerobic)
E21+E22	E1	99.4485	100	544	70	541	70	182.128	227.132	-0.318581	0.0772049	0.156609	1	0	1	1	1	HEMESYN2-PWY: heme biosynthesis II (anaerobic)
E21+E22	E1	100	100	544	70	544	70	546.679	610.28	-0.158777	0.0435909	0.101	1		1	1	1	HEXITOLDEGSUPER-PWY: superpathway of hexitol degradation (bacteria)
E21+E22	E1	100	100	544	70	544	70	2138.14	2007.01	0.0913038	0.252683	0.345276	1		1	1	1	HISDEG-PWY: L-histidine degradation I
E21+E22	E1	100	100	544	70	544	70	2412.21	2546.14	-0.0779592	0.302765	0.385268	1		1	1	1	HISTSYN-PWY: L-histidine biosynthesis
E21+E22	E1	100	100	544	70	544	70	1778.12	1818.49	-0.0323915	0.447465	0.479426	1		1	1	1	HOMOSER-METSYN-PWY: L-methionine biosynthesis I
E21+E22	E1	100	100	544	70	544	70	1664.88	1732.66	-0.0575708	0.303765	0.385577	1		1	1	1	HSERMETANA-PWY: L-methionine biosynthesis III
E21+E22	E1	100	100	544	70	544	70	8155.78	8339.69	-0.0321707	0.208984	0.306109	1		1	1	1	ILEUSYN-PWY: L-isoleucine biosynthesis I (from threonine)
E21+E22	E1	20.9559	22.8571	544	70	114	16	10.9735	12.8537	-0.228157	0.391237	0.448518	1	0.894767	0.755945	1	1	KDO-NAGLIPASYN-PWY: superpathway of (Kdo)2-lipid A biosynthesis
E21+E22	E1	46.3235	50	544	70	252	35	20.5126	21.213	-0.0484402	0.288884	0.372258	1	0.863014	0.611446	1	1	KETOGLUCONMET-PWY: ketogluconate metabolism
E21+E22	E1	97.2426	100	544	70	529	70	277.019	359.58	-0.376328	0.0193358	0.0522117	1	0	0.398002	1	1	LACTOSECAT-PWY: lactose and galactose degradation I
E21+E22	E1	100	100	544	70	544	70	2984.6	3173.52	-0.0885491	0.425196	0.46836	1		1	1	1	MET-SAM-PWY: superpathway of S-adenosyl-L-methionine biosynthesis
E21+E22	E1	32.1691	27.1429	544	70	175	19	56.1159	34.855	0.687044	0.0949565	0.181361	1	1.273	0.416691	1	1	METHANOGENESIS-PWY: methanogenesis from H2 and CO2
E21+E22	E1	32.1691	35.7143	544	70	175	25	12.2635	12.8482	-0.0672053	0.285243	0.370932	1	0.853659	0.588428	1	1	METHGLYUT-PWY: superpathway of methylglyoxal degradation
E21+E22	E1	100	100	544	70	544	70	2836.31	2904.87	-0.0344584	0.462787	0.486189	1		1	1	1	METSYN-PWY: L-homoserine and L-methionine biosynthesis
E21+E22	E1	80.5147	82.8571	544	70	438	58	43.9575	42.2055	0.058679	0.399491	0.450867	1	0.854912	0.748037	1	1	NAD-BIOSYNTHESIS-II: NAD salvage pathway II
E21+E22	E1	95.2206	95.7143	544	70	518	67	140.001	147.282	-0.0731477	0.240256	0.333671	1	0.892078	1	1	1	NAGLIPASYN-PWY: lipid IVA biosynthesis
E21+E22	E1	100	100	544	70	544	70	7827.24	8155.44	-0.059259	0.163818	0.26471	1		1	1	1	NONMEVIPP-PWY: methylerythritol phosphate pathway I
E21+E22	E1	100	100	544	70	544	70	4871.42	5090.7	-0.0635214	0.159957	0.260956	1		1	1	1	NONOXIPENT-PWY: pentose phosphate pathway (non-oxidative branch)
E21+E22	E1	99.8162	98.5714	544	70	543	69	876.27	1039.05	-0.245825	0.207854	0.306109	1	7.86957	0.21518	0.972714	1	OANTIGEN-PWY: O-antigen building blocks biosynthesis (E. coli)
E21+E22	E1	36.9485	42.8571	544	70	201	30	73.7279	52.2217	0.497562	0.193537	0.292751	1	0.781341	0.360059	1	1	P105-PWY: TCA cycle IV (2-oxoglutarate decarboxylase)
E21+E22	E1	79.2279	74.2857	544	70	431	52	89.4352	89.1017	0.00538966	0.286762	0.370932	1	1.32029	0.353419	1	1	P108-PWY: pyruvate fermentation to propanoate I
E21+E22	E1	89.8897	85.7143	544	70	489	60	33.3755	38.6291	-0.210901	0.166342	0.265401	1	1.48182	0.300887	1	1	P122-PWY: heterolactic fermentation
E21+E22	E1	97.0588	98.5714	544	70	528	69	212.498	270.536	-0.348375	0.103409	0.192803	1	0.478261	0.708193	1	1	P124-PWY: Bifidobacterium shunt
E21+E22	E1	100	100	544	70	544	70	246.553	258.628	-0.0689754	0.47788	0.493272	1		1	1	1	P161-PWY: acetylene degradation
E21+E22	E1	100	100	544	70	544	70	264.202	267.88	-0.0199441	0.455685	0.482122	1		1	1	1	P162-PWY: L-glutamate degradation V (via hydroxyglutarate)
E21+E22	E1	81.0662	78.5714	544	70	441	55	30.5742	26.8371	0.188089	0.0669045	0.141598	1	1.1677	0.629407	1	1	P163-PWY: L-lysine fermentation to acetate and butanoate
E21+E22	E1	100	100	544	70	544	70	311.139	312.774	-0.00755944	0.228842	0.322661	1		1	1	1	P164-PWY: purine nucleobases degradation I (anaerobic)
E21+E22	E1	100	100	544	70	544	70	216.607	227.614	-0.0715098	0.225604	0.321533	1		1	1	1	P185-PWY: formaldehyde assimilation III (dihydroxyacetone cycle)
E21+E22	E1	23.7132	24.2857	544	70	129	17	5.68267	5.68413	-0.00037057	0.490819	0.494692	1	0.9691	0.882457	1	1	P221-PWY: octane oxidation
E21+E22	E1	46.6912	48.5714	544	70	254	34	23.1702	19.8711	0.221594	0.483437	0.494392	1	0.927383	0.799931	1	1	P23-PWY: reductive TCA cycle I
E21+E22	E1	100	100	544	70	544	70	1109.73	1243.85	-0.164594	0.21022	0.307477	1		1	1	1	P4-PWY: superpathway of L-lysine, L-threonine and L-methionine biosynthesis I
E21+E22	E1	100	100	544	70	544	70	831.004	772.289	0.105715	0.037255	0.0894472	1		1	1	1	P42-PWY: incomplete reductive TCA cycle
E21+E22	E1	100	100	544	70	544	70	494.88	514.639	-0.0564826	0.137892	0.23632	1		1	1	1	P441-PWY: superpathway of N-acetylneuraminate degradation
E21+E22	E1	100	100	544	70	544	70	311.335	321.076	-0.0444467	0.0955304	0.181776	1		1	1	1	P461-PWY: hexitol fermentation to lactate, formate, ethanol and acetate
E21+E22	E1	100	100	544	70	544	70	5472.07	5574.78	-0.0268274	0.172085	0.268322	1		1	1	1	PANTO-PWY: phosphopantothenate biosynthesis I
E21+E22	E1	100	100	544	70	544	70	3135.43	3196.1	-0.0276491	0.48387	0.494392	1		1	1	1	PANTOSYN-PWY: pantothenate and coenzyme A biosynthesis I
E21+E22	E1	100	100	544	70	544	70	936.228	928.723	0.0116111	0.428565	0.469622	1		1	1	1	PENTOSE-P-PWY: pentose phosphate pathway
E21+E22	E1	100	100	544	70	544	70	8040.59	8053.63	-0.00233766	0.372462	0.43614	1		1	1	1	PEPTIDOGLYCANSYN-PWY: peptidoglycan biosynthesis I (meso-diaminopimelate containing)
E21+E22	E1	100	100	544	70	544	70	1062.04	1054.5	0.0102726	0.302515	0.385268	1		1	1	1	PHOSLIPSYN-PWY: superpathway of phospholipid biosynthesis I (bacteria)
E21+E22	E1	85.2941	90	544	70	464	63	129.847	132.744	-0.0318333	0.140568	0.239295	1	0.644444	0.36358	1	1	POLYAMINSYN3-PWY: superpathway of polyamine biosynthesis II
E21+E22	E1	100	100	544	70	544	70	890.143	811.437	0.133558	0.151237	0.250749	1		1	1	1	POLYAMSYN-PWY: superpathway of polyamine biosynthesis I
E21+E22	E1	60.8456	60	544	70	331	42	43.1419	35.2576	0.291157	0.380324	0.440883	1	1.03599	0.897165	1	1	POLYISOPRENSYN-PWY: polyisoprenoid biosynthesis (E. coli)
E21+E22	E1	100	100	544	70	544	70	309.91	324.074	-0.0644753	0.201455	0.299826	1		1	1	1	PPGPPMET-PWY: ppGpp biosynthesis
E21+E22	E1	100	100	544	70	544	70	2112.99	2197.43	-0.0565336	0.23058	0.324213	1		1	1	1	PRPP-PWY: superpathway of histidine, purine, and pyrimidine biosynthesis
E21+E22	E1	100	100	544	70	544	70	6386.98	6757.38	-0.0813317	0.105095	0.194168	1		1	1	1	PWY-1042: glycolysis IV (plant cytosol)
E21+E22	E1	100	100	544	70	544	70	722.413	703.921	0.0374104	0.472179	0.491158	1		1	1	1	PWY-1269: CMP-3-deoxy-D-manno-octulosonate biosynthesis I
E21+E22	E1	84.7426	78.5714	544	70	461	55	93.2965	96.0795	-0.0424063	0.100212	0.18822	1	1.51479	0.223059	0.987279	1	PWY-1861: formaldehyde assimilation II (RuMP Cycle)
E21+E22	E1	99.8162	98.5714	544	70	543	69	348.202	400.647	-0.202409	0.196758	0.296129	1	7.86957	0.21518	0.972714	1	PWY-241: C4 photosynthetic carbon assimilation cycle, NADP-ME type
E21+E22	E1	21.6912	20	544	70	118	14	24.7265	42.5551	-0.783274	0.425908	0.46836	1	1.10798	0.87731	1	1	PWY-2723: trehalose degradation V
E21+E22	E1	100	100	544	70	544	70	872.348	981.793	-0.170515	0.125669	0.222103	1		1	1	1	PWY-2941: L-lysine biosynthesis II
E21+E22	E1	100	100	544	70	544	70	6574.23	6961.55	-0.0825852	0.166664	0.265401	1		1	1	1	PWY-2942: L-lysine biosynthesis III
E21+E22	E1	100	100	544	70	544	70	3844.26	4014.15	-0.0623892	0.330533	0.406235	1		1	1	1	PWY-3001: superpathway of L-isoleucine biosynthesis I
E21+E22	E1	26.4706	28.5714	544	70	144	20	10.6072	14.7788	-0.478487	0.268216	0.359158	1	0.9	0.77415	1	1	PWY-3781: aerobic respiration I (cytochrome c)
E21+E22	E1	100	100	544	70	544	70	2687.39	2754.3	-0.0354826	0.28453	0.370932	1		1	1	1	PWY-3841: folate transformations II
E21+E22	E1	30.8824	37.1429	544	70	168	26	17.2654	15.6905	0.13799	0.169262	0.26632	1	0.756137	0.338865	1	1	PWY-4041: &gamma;-glutamyl cycle
E21+E22	E1	100	100	544	70	544	70	1461.58	1430.3	0.0312089	0.239156	0.332596	1		1	1	1	PWY-4242: pantothenate and coenzyme A biosynthesis III
E21+E22	E1	70.2206	71.4286	544	70	382	50	56.9513	56.5192	0.0109886	0.478164	0.493272	1	0.94321	0.890174	1	1	PWY-4702: phytate degradation I
E21+E22	E1	100	100	544	70	544	70	921.659	930.664	-0.0140276	0.344393	0.413435	1		1	1	1	PWY-4981: L-proline biosynthesis II (from arginine)
E21+E22	E1	100	100	544	70	544	70	342.847	318.471	0.106404	0.259826	0.351733	1		1	1	1	PWY-4984: urea cycle
E21+E22	E1	20.7721	21.4286	544	70	113	15	26.0471	20.5315	0.343286	0.49075	0.494692	1	0.96133	0.876554	1	1	PWY-5004: superpathway of L-citrulline metabolism
E21+E22	E1	83.0882	84.2857	544	70	452	59	261.495	267.698	-0.0338237	0.40155	0.452188	1	0.915991	1	1	1	PWY-5005: biotin biosynthesis II
E21+E22	E1	80.3309	70	544	70	437	49	42.8843	40.9593	0.0662591	0.0517613	0.1148	1	1.75033	0.0594371	0.441099	1	PWY-5022: 4-aminobutanoate degradation V
E21+E22	E1	99.8162	100	544	70	543	70	487.217	475.732	0.0344159	0.293828	0.376248	1	0	1	1	1	PWY-5030: L-histidine degradation III
E21+E22	E1	50.3676	54.2857	544	70	274	38	25.4966	27.9094	-0.130448	0.278654	0.367448	1	0.854581	0.611783	1	1	PWY-5083: NAD/NADH phosphorylation and dephosphorylation
E21+E22	E1	100	100	544	70	544	70	7219.03	7559.24	-0.0664361	0.164349	0.265147	1		1	1	1	PWY-5097: L-lysine biosynthesis VI
E21+E22	E1	100	100	544	70	544	70	2099.25	2177.21	-0.052604	0.184975	0.28274	1		1	1	1	PWY-5100: pyruvate fermentation to acetate and lactate II
E21+E22	E1	100	100	544	70	544	70	448.346	427.52	0.068622	0.190762	0.289844	1		1	1	1	PWY-5101: L-isoleucine biosynthesis II
E21+E22	E1	100	100	544	70	544	70	4594.05	4666.65	-0.0226226	0.372191	0.43614	1		1	1	1	PWY-5103: L-isoleucine biosynthesis III
E21+E22	E1	100	100	544	70	544	70	1292.47	1077.11	0.262961	0.0429336	0.100015	1		1	1	1	PWY-5104: L-isoleucine biosynthesis IV
E21+E22	E1	94.6691	98.5714	544	70	515	69	336.19	331.027	0.0223281	0.483441	0.494392	1	0.257371	0.236447	1	1	PWY-5121: superpathway of geranylgeranyl diphosphate biosynthesis II (via MEP)
E21+E22	E1	96.875	97.1429	544	70	527	68	135.946	130.804	0.0556262	0.227973	0.322661	1	0.911765	1	1	1	PWY-5136: fatty acid &beta;-oxidation II (peroxisome)
E21+E22	E1	43.1985	47.1429	544	70	235	33	32.4736	35.0938	-0.111946	0.297207	0.37962	1	0.852702	0.608842	1	1	PWY-5138: unsaturated, even numbered fatty acid &beta;-oxidation
E21+E22	E1	100	100	544	70	544	70	594.69	729.818	-0.295398	0.0551731	0.121048	1		1	1	1	PWY-5154: L-arginine biosynthesis III (via N-acetyl-L-citrulline)
E21+E22	E1	46.875	55.7143	544	70	255	39	17.9207	17.6085	0.0253567	0.123724	0.21981	1	0.701357	0.203495	0.959062	1	PWY-5173: superpathway of acetyl-CoA biosynthesis
E21+E22	E1	100	100	544	70	544	70	910.04	933.885	-0.0373151	0.482443	0.494392	1		1	1	1	PWY-5177: glutaryl-CoA degradation
E21+E22	E1	100	100	544	70	544	70	2387.64	2367.87	0.011995	0.461934	0.485794	1		1	1	1	PWY-5188: tetrapyrrole biosynthesis I (from glutamate)
E21+E22	E1	99.4485	100	544	70	541	70	306.453	276.599	0.147871	0.347826	0.416083	1	0	1	1	1	PWY-5189: tetrapyrrole biosynthesis II (from glycine)
E21+E22	E1	32.3529	27.1429	544	70	176	19	46.0747	22.1497	1.05668	0.0844404	0.166913	1	1.28375	0.415601	1	1	PWY-5198: factor 420 biosynthesis
E21+E22	E1	99.6324	100	544	70	542	70	259.362	246.024	0.0761686	0.227976	0.322661	1	0	1	1	1	PWY-5304: superpathway of sulfur oxidation (Acidianus ambivalens)
E21+E22	E1	98.5294	94.2857	544	70	536	66	514.097	487.356	0.0770654	0.231887	0.325153	1	4.06061	0.0377933	0.312793	1	PWY-5345: superpathway of L-methionine biosynthesis (by sulfhydrylation)
E21+E22	E1	100	100	544	70	544	70	2599.38	2635.97	-0.0201642	0.45455	0.482013	1		1	1	1	PWY-5347: superpathway of L-methionine biosynthesis (transsulfuration)
E21+E22	E1	98.5294	98.5714	544	70	536	69	554.013	670.92	-0.276221	0.27299	0.36264	1	0.971014	1	1	1	PWY-5367: petroselinate biosynthesis
E21+E22	E1	97.0588	94.2857	544	70	528	66	89.3421	115.851	-0.374861	0.26355	0.355356	1	2	0.269658	1	1	PWY-5384: sucrose degradation IV (sucrose phosphorylase)
E21+E22	E1	75.7353	82.8571	544	70	412	58	74.7939	75.3132	-0.00998327	0.124132	0.220151	1	0.645768	0.230439	0.992914	1	PWY-5464: superpathway of cytosolic glycolysis (plants), pyruvate dehydrogenase and TCA cycle
E21+E22	E1	100	100	544	70	544	70	1250.84	1206.63	0.0519143	0.392944	0.448791	1		1	1	1	PWY-5484: glycolysis II (from fructose 6-phosphate)
E21+E22	E1	99.8162	100	544	70	543	70	198.031	208.957	-0.0774746	0.491291	0.494692	1	0	1	1	1	PWY-5505: L-glutamate and L-glutamine biosynthesis
E21+E22	E1	36.7647	42.8571	544	70	200	30	49.342	39.2525	0.330031	0.194143	0.293231	1	0.775194	0.358851	1	1	PWY-561: superpathway of glyoxylate cycle and fatty acid degradation
E21+E22	E1	30.8824	28.5714	544	70	168	20	18.8745	16.9109	0.158489	0.338313	0.410831	1	1.11702	0.783385	1	1	PWY-5656: mannosylglycerate biosynthesis I
E21+E22	E1	100	100	544	70	544	70	1999.5	1992.4	0.00512919	0.40344	0.452626	1		1	1	1	PWY-5659: GDP-mannose biosynthesis
E21+E22	E1	100	100	544	70	544	70	6674.91	6968.44	-0.0620873	0.343866	0.413289	1		1	1	1	PWY-5667: CDP-diacylglycerol biosynthesis I
E21+E22	E1	34.1912	40	544	70	186	28	17.5856	14.1821	0.310327	0.252408	0.345276	1	0.77933	0.352552	1	1	PWY-5675: nitrate reduction V (assimilatory)
E21+E22	E1	100	100	544	70	544	70	958.917	929.463	0.0450093	0.15107	0.250749	1		1	1	1	PWY-5676: acetyl-CoA fermentation to butanoate II
E21+E22	E1	100	100	544	70	544	70	9225.07	9492.67	-0.041254	0.223246	0.319192	1		1	1	1	PWY-5686: UMP biosynthesis
E21+E22	E1	100	100	544	70	544	70	878.311	911.66	-0.0537635	0.437292	0.474921	1		1	1	1	PWY-5690: TCA cycle II (plants and fungi)
E21+E22	E1	100	100	544	70	544	70	5253.59	5513.35	-0.0696254	0.0868488	0.17068	1		1	1	1	PWY-5695: urate biosynthesis/inosine 5'-phosphate degradation
E21+E22	E1	32.1691	28.5714	544	70	175	20	12.6963	12.9593	-0.0295832	0.256592	0.347817	1	1.18564	0.587659	1	1	PWY-5705: allantoin degradation to glyoxylate III
E21+E22	E1	34.9265	35.7143	544	70	190	25	52.954	61.6565	-0.219515	0.40813	0.455099	1	0.966102	0.894767	1	1	PWY-5723: Rubisco shunt
E21+E22	E1	31.6176	40	544	70	172	28	12.6811	11.4309	0.149739	0.141204	0.239975	1	0.693548	0.175863	0.895525	1	PWY-5747: 2-methylcitrate cycle II
E21+E22	E1	53.8603	50	544	70	293	35	12.9227	14.4688	-0.163035	0.337326	0.410831	1	1.16733	0.611	1	1	PWY-5754: 4-hydroxybenzoate biosynthesis I (eukaryotes)
E21+E22	E1	57.9044	58.5714	544	70	315	41	52.7553	57.2531	-0.118036	0.380459	0.440883	1	0.972947	1	1	1	PWY-5791: 1,4-dihydroxy-2-naphthoate biosynthesis II (plants)
E21+E22	E1	57.9044	58.5714	544	70	315	41	52.7553	57.2531	-0.118036	0.380459	0.440883	1	0.972947	1	1	1	PWY-5837: 1,4-dihydroxy-2-naphthoate biosynthesis I
E21+E22	E1	31.6176	32.8571	544	70	172	23	90.9942	75.3131	0.272874	0.497407	0.498062	1	0.944834	0.891612	1	1	PWY-5838: superpathway of menaquinol-8 biosynthesis I
E21+E22	E1	56.4338	58.5714	544	70	307	41	142.341	130.969	0.120128	0.454514	0.482013	1	0.916229	0.798247	1	1	PWY-5840: superpathway of menaquinol-7 biosynthesis
E21+E22	E1	22.0588	22.8571	544	70	120	16	144.509	131.916	0.131539	0.489196	0.494692	1	0.955189	0.878921	1	1	PWY-5845: superpathway of menaquinol-9 biosynthesis
E21+E22	E1	22.0588	22.8571	544	70	120	16	144.509	131.916	0.131539	0.489196	0.494692	1	0.955189	0.878921	1	1	PWY-5850: superpathway of menaquinol-6 biosynthesis I
E21+E22	E1	30.3309	38.5714	544	70	165	27	16.9084	12.0532	0.488322	0.167896	0.265401	1	0.693345	0.171956	0.893119	1	PWY-5855: ubiquinol-7 biosynthesis (prokaryotic)
E21+E22	E1	30.3309	38.5714	544	70	165	27	16.9084	12.0532	0.488322	0.167896	0.265401	1	0.693345	0.171956	0.893119	1	PWY-5856: ubiquinol-9 biosynthesis (prokaryotic)
E21+E22	E1	30.3309	38.5714	544	70	165	27	16.9084	12.0532	0.488322	0.167896	0.265401	1	0.693345	0.171956	0.893119	1	PWY-5857: ubiquinol-10 biosynthesis (prokaryotic)
E21+E22	E1	22.0588	22.8571	544	70	120	16	99.7746	89.1347	0.162686	0.486446	0.494692	1	0.955189	0.878921	1	1	PWY-5860: superpathway of demethylmenaquinol-6 biosynthesis I
E21+E22	E1	31.6176	32.8571	544	70	172	23	61.2729	50.6559	0.27452	0.499136	0.499136	1	0.944834	0.891612	1	1	PWY-5861: superpathway of demethylmenaquinol-8 biosynthesis
E21+E22	E1	22.0588	22.8571	544	70	120	16	99.7746	89.1347	0.162686	0.486446	0.494692	1	0.955189	0.878921	1	1	PWY-5862: superpathway of demethylmenaquinol-9 biosynthesis
E21+E22	E1	57.9044	58.5714	544	70	315	41	56.9971	62.336	-0.129176	0.441447	0.476052	1	0.972947	1	1	1	PWY-5863: superpathway of phylloquinol biosynthesis
E21+E22	E1	42.0956	34.2857	544	70	229	24	50.9454	56.9992	-0.161989	0.114894	0.20738	1	1.39339	0.246061	1	1	PWY-5871: ubiquinol-9 biosynthesis (eukaryotic)
E21+E22	E1	42.0956	34.2857	544	70	229	24	50.9454	56.9992	-0.161989	0.114894	0.20738	1	1.39339	0.246061	1	1	PWY-5873: ubiquinol-7 biosynthesis (eukaryotic)
E21+E22	E1	22.0588	22.8571	544	70	120	16	144.509	131.916	0.131539	0.489196	0.494692	1	0.955189	0.878921	1	1	PWY-5896: superpathway of menaquinol-10 biosynthesis
E21+E22	E1	57.9044	58.5714	544	70	315	41	152.118	165.123	-0.118351	0.396997	0.448791	1	0.972947	1	1	1	PWY-5897: superpathway of menaquinol-11 biosynthesis
E21+E22	E1	57.9044	58.5714	544	70	315	41	152.118	165.123	-0.118351	0.396997	0.448791	1	0.972947	1	1	1	PWY-5898: superpathway of menaquinol-12 biosynthesis
E21+E22	E1	57.9044	58.5714	544	70	315	41	152.118	165.123	-0.118351	0.396997	0.448791	1	0.972947	1	1	1	PWY-5899: superpathway of menaquinol-13 biosynthesis
E21+E22	E1	99.8162	98.5714	544	70	543	69	455.518	539.08	-0.242993	0.0498419	0.112254	1	7.86957	0.21518	0.972714	1	PWY-5913: TCA cycle VI (obligate autotrophs)
E21+E22	E1	95.2206	97.1429	544	70	518	68	150.452	166.951	-0.150122	0.113798	0.206133	1	0.585973	0.759381	1	1	PWY-5918: superpathay of heme biosynthesis from glutamate
E21+E22	E1	41.3603	45.7143	544	70	225	32	33.4321	34.1186	-0.0293281	0.282244	0.369743	1	0.837578	0.520933	1	1	PWY-5920: superpathway of heme biosynthesis from glycine
E21+E22	E1	100	100	544	70	544	70	901.329	1004.67	-0.156597	0.469331	0.49003	1		1	1	1	PWY-5941: glycogen degradation II (eukaryotic)
E21+E22	E1	97.7941	95.7143	544	70	532	67	293.307	280.387	0.0649912	0.200247	0.298823	1	1.98507	0.238877	1	1	PWY-5971: palmitate biosynthesis II (bacteria and plants)
E21+E22	E1	100	100	544	70	544	70	3519.75	3619.07	-0.0401436	0.309798	0.390315	1		1	1	1	PWY-5973: cis-vaccenate biosynthesis
E21+E22	E1	99.8162	100	544	70	543	70	718.924	816.904	-0.184328	0.409271	0.45584	1	0	1	1	1	PWY-5989: stearate biosynthesis II (bacteria and plants)
E21+E22	E1	97.7941	95.7143	544	70	532	67	290.718	280.218	0.0530676	0.234076	0.32732	1	1.98507	0.238877	1	1	PWY-6113: superpathway of mycolate biosynthesis
E21+E22	E1	100	100	544	70	544	70	7228.25	7327.33	-0.019642	0.497573	0.498062	1		1	1	1	PWY-6121: 5-aminoimidazole ribonucleotide biosynthesis I
E21+E22	E1	100	100	544	70	544	70	7260.2	7400.27	-0.027568	0.351802	0.418871	1		1	1	1	PWY-6122: 5-aminoimidazole ribonucleotide biosynthesis II
E21+E22	E1	100	100	544	70	544	70	2470.77	2624.79	-0.0872412	0.19805	0.29693	1		1	1	1	PWY-6123: inosine-5'-phosphate biosynthesis I
E21+E22	E1	100	100	544	70	544	70	2240.27	2359.67	-0.074909	0.249037	0.342593	1		1	1	1	PWY-6124: inosine-5'-phosphate biosynthesis II
E21+E22	E1	100	100	544	70	544	70	2864.45	2955.24	-0.0450158	0.415401	0.461154	1		1	1	1	PWY-6125: superpathway of guanosine nucleotides de novo biosynthesis II
E21+E22	E1	100	100	544	70	544	70	5622.02	5781.98	-0.0404752	0.268487	0.359158	1		1	1	1	PWY-6126: superpathway of adenosine nucleotides de novo biosynthesis II
E21+E22	E1	99.8162	100	544	70	543	70	302.196	325.889	-0.108895	0.471895	0.491158	1	0	1	1	1	PWY-6147: 6-hydroxymethyl-dihydropterin diphosphate biosynthesis I
E21+E22	E1	100	100	544	70	544	70	7363.44	7659.86	-0.0569378	0.203676	0.301808	1		1	1	1	PWY-6151: S-adenosyl-L-methionine cycle I
E21+E22	E1	100	100	544	70	544	70	7494.47	7777.24	-0.0534309	0.0874162	0.171464	1		1	1	1	PWY-6163: chorismate biosynthesis from 3-dehydroquinate
E21+E22	E1	29.0441	21.4286	544	70	158	15	146.038	64.6067	1.17659	0.0423002	0.0992202	1	1.50086	0.205584	0.964446	1	PWY-6167: flavin biosynthesis II (archaea)
E21+E22	E1	100	100	544	70	544	70	2563.39	2637.9	-0.0413378	0.323303	0.400879	1		1	1	1	PWY-6168: flavin biosynthesis III (fungi)
E21+E22	E1	100	100	544	70	544	70	2761.22	3033.11	-0.135493	0.154278	0.253724	1		1	1	1	PWY-621: sucrose degradation III (sucrose invertase)
E21+E22	E1	30.1471	28.5714	544	70	164	20	27.1443	23.7343	0.193678	0.316502	0.397286	1	1.07895	0.889955	1	1	PWY-6263: superpathway of menaquinol-8 biosynthesis II
E21+E22	E1	94.3015	95.7143	544	70	513	67	748.155	852.543	-0.188436	0.36934	0.434167	1	0.740973	0.786418	1	1	PWY-6270: isoprene biosynthesis I
E21+E22	E1	100	100	544	70	544	70	7260.2	7400.27	-0.027568	0.351802	0.418871	1		1	1	1	PWY-6277: superpathway of 5-aminoimidazole ribonucleotide biosynthesis
E21+E22	E1	99.0809	97.1429	544	70	539	68	241.433	235.637	0.0350621	0.185932	0.283776	1	3.17059	0.184735	0.895525	1	PWY-6282: palmitoleate biosynthesis I (from (5Z)-dodec-5-enoate)
E21+E22	E1	97.7941	95.7143	544	70	532	67	255.832	266.214	-0.0573923	0.273226	0.36264	1	1.98507	0.238877	1	1	PWY-6284: superpathway of unsaturated fatty acids biosynthesis (E. coli)
E21+E22	E1	34.1912	34.2857	544	70	186	24	166.833	142.148	0.231015	0.405175	0.452765	1	0.99581	1	1	1	PWY-6285: superpathway of fatty acids biosynthesis (E. coli)
E21+E22	E1	100	100	544	70	544	70	1852.66	1807.82	0.0353416	0.324589	0.401496	1		1	1	1	PWY-6305: putrescine biosynthesis IV
E21+E22	E1	38.2353	47.1429	544	70	208	33	6.23621	4.82165	0.371142	0.180178	0.277911	1	0.694084	0.154955	0.848085	1	PWY-6309: L-tryptophan degradation XI (mammalian, via kynurenine)
E21+E22	E1	100	100	544	70	544	70	4237.66	4219.6	0.00616036	0.440396	0.47588	1		1	1	1	PWY-6317: galactose degradation I (Leloir pathway)
E21+E22	E1	27.2059	25.7143	544	70	148	18	20.0389	15.9105	0.33283	0.342723	0.412905	1	1.07969	0.886649	1	1	PWY-6318: L-phenylalanine degradation IV (mammalian, via side chain)
E21+E22	E1	100	100	544	70	544	70	868.218	951.479	-0.132114	0.0704022	0.146264	1		1	1	1	PWY-6353: purine nucleotides degradation II (aerobic)
E21+E22	E1	100	100	544	70	544	70	4681.74	4578.33	0.0322215	0.285746	0.370932	1		1	1	1	PWY-6385: peptidoglycan biosynthesis III (mycobacteria)
E21+E22	E1	100	100	544	70	544	70	9195.49	9310.18	-0.0178823	0.378435	0.440527	1		1	1	1	PWY-6386: UDP-N-acetylmuramoyl-pentapeptide biosynthesis II (lysine-containing)
E21+E22	E1	100	100	544	70	544	70	8893.02	9046.63	-0.0247064	0.338875	0.410831	1		1	1	1	PWY-6387: UDP-N-acetylmuramoyl-pentapeptide biosynthesis I (meso-diaminopimelate containing)
E21+E22	E1	90.9926	88.5714	544	70	495	62	44.2341	40.0694	0.14266	0.158991	0.259796	1	1.30349	0.511262	1	1	PWY-6435: 4-hydroxybenzoate biosynthesis V
E21+E22	E1	62.5	70	544	70	340	49	130.811	139.024	-0.0878468	0.0516184	0.114733	1	0.714286	0.237996	1	1	PWY-6471: peptidoglycan biosynthesis IV (Enterococcus faecium)
E21+E22	E1	100	100	544	70	544	70	1262.23	1269.55	-0.00834083	0.253599	0.3456	1		1	1	1	PWY-6507: 4-deoxy-L-threo-hex-4-enopyranuronate degradation
E21+E22	E1	99.0809	97.1429	544	70	539	68	215.406	209.66	0.0390065	0.160829	0.261959	1	3.17059	0.184735	0.895525	1	PWY-6519: 8-amino-7-oxononanoate biosynthesis I
E21+E22	E1	100	100	544	70	544	70	3961.8	3976.35	-0.00528917	0.489007	0.494692	1		1	1	1	PWY-6527: stachyose degradation
E21+E22	E1	92.6471	91.4286	544	70	504	64	120.566	144.048	-0.256725	0.265384	0.356503	1	1.18125	0.634736	1	1	PWY-6531: mannitol cycle
E21+E22	E1	100	100	544	70	544	70	1984.13	1912.42	0.05311	0.309041	0.389844	1		1	1	1	PWY-6545: pyrimidine deoxyribonucleotides de novo biosynthesis III
E21+E22	E1	100	100	544	70	544	70	339.212	363.506	-0.0997894	0.268959	0.359318	1		1	1	1	PWY-6549: L-glutamine biosynthesis III
E21+E22	E1	100	100	544	70	544	70	214.575	199.52	0.104946	0.138208	0.236463	1		1	1	1	PWY-6588: pyruvate fermentation to acetone
E21+E22	E1	99.4485	100	544	70	541	70	388.126	374.986	0.0496865	0.131073	0.226925	1	0	1	1	1	PWY-6590: superpathway of Clostridium acetobutylicum acidogenic fermentation
E21+E22	E1	100	100	544	70	544	70	334.739	346.474	-0.049709	0.467908	0.489045	1		1	1	1	PWY-6595: superpathway of guanosine nucleotides degradation (plants)
E21+E22	E1	100	100	544	70	544	70	444.582	488.639	-0.136322	0.360875	0.427492	1		1	1	1	PWY-6606: guanosine nucleotides degradation II
E21+E22	E1	100	100	544	70	544	70	1876.41	2006.85	-0.096962	0.26192	0.353626	1		1	1	1	PWY-6608: guanosine nucleotides degradation III
E21+E22	E1	100	100	544	70	544	70	2413.67	2491.64	-0.0458688	0.322275	0.400113	1		1	1	1	PWY-6609: adenine and adenosine salvage III
E21+E22	E1	99.0809	98.5714	544	70	539	69	402.803	420.775	-0.0629726	0.363693	0.428518	1	1.56232	0.51782	1	1	PWY-6612: superpathway of tetrahydrofolate biosynthesis
E21+E22	E1	53.8603	58.5714	544	70	293	41	146.942	139.466	0.0753298	0.231833	0.325153	1	0.825673	0.52427	1	1	PWY-6628: superpathway of L-phenylalanine biosynthesis
E21+E22	E1	38.2353	37.1429	544	70	208	26	117.202	125.165	-0.0948379	0.434097	0.473138	1	1.04762	0.89667	1	1	PWY-6629: superpathway of L-tryptophan biosynthesis
E21+E22	E1	95.5882	94.2857	544	70	520	66	210.816	298.051	-0.499574	0.181356	0.278883	1	1.31313	0.547479	1	1	PWY-6630: superpathway of L-tyrosine biosynthesis
E21+E22	E1	100	100	544	70	544	70	5456.48	5277.94	0.0479962	0.457388	0.48301	1		1	1	1	PWY-6700: queuosine biosynthesis
E21+E22	E1	100	100	544	70	544	70	3840.97	3910.6	-0.0259169	0.408159	0.455099	1		1	1	1	PWY-6703: preQ0 biosynthesis
E21+E22	E1	30.3309	38.5714	544	70	165	27	16.9084	12.0532	0.488322	0.167896	0.265401	1	0.693345	0.171956	0.893119	1	PWY-6708: ubiquinol-8 biosynthesis (prokaryotic)
E21+E22	E1	100	100	544	70	544	70	10469.8	10551.4	-0.0112035	0.403717	0.452626	1		1	1	1	PWY-6737: starch degradation V
E21+E22	E1	33.0882	35.7143	544	70	180	25	31.0894	20.6687	0.58898	0.356431	0.422898	1	0.89011	0.687098	1	1	PWY-6803: phosphatidylcholine acyl editing
E21+E22	E1	20.5882	20	544	70	112	14	10.4493	11.838	-0.180014	0.436132	0.474847	1	1.03704	1	1	1	PWY-6823: molybdenum cofactor biosynthesis
E21+E22	E1	29.7794	40	544	70	162	28	12.8308	7.43612	0.786988	0.091779	0.177754	1	0.636126	0.0987278	0.624987	1	PWY-6837: fatty acid beta-oxidation V (unsaturated, odd number, di-isomerase-dependent)
E21+E22	E1	57.1691	54.2857	544	70	311	38	53.9105	37.2221	0.534408	0.158504	0.259417	1	1.12401	0.701027	1	1	PWY-6859: all-trans-farnesol biosynthesis
E21+E22	E1	27.7574	30	544	70	151	21	15.7876	15.9185	-0.0119079	0.340081	0.411167	1	0.896522	0.673957	1	1	PWY-6891: thiazole biosynthesis II (Bacillus)
E21+E22	E1	100	100	544	70	544	70	105.25	111.025	-0.0770707	0.303265	0.385423	1		1	1	1	PWY-6892: thiazole biosynthesis I (E. coli)
E21+E22	E1	27.7574	30	544	70	151	21	78.1761	78.6521	-0.00875684	0.342736	0.412905	1	0.896522	0.673957	1	1	PWY-6895: superpathway of thiamin diphosphate biosynthesis II
E21+E22	E1	100	100	544	70	544	70	2997.76	3138.46	-0.0661709	0.212498	0.308592	1		1	1	1	PWY-6897: thiamin salvage II
E21+E22	E1	100	100	544	70	544	70	528.192	577.279	-0.128204	0.0940807	0.180027	1		1	1	1	PWY-6901: superpathway of glucose and xylose degradation
E21+E22	E1	100	100	544	70	544	70	2103.58	2056.61	0.0325783	0.169722	0.266632	1		1	1	1	PWY-6936: seleno-amino acid biosynthesis
E21+E22	E1	100	100	544	70	544	70	1141.78	1176.44	-0.0431384	0.291368	0.374511	1		1	1	1	PWY-6969: TCA cycle V (2-oxoglutarate:ferredoxin oxidoreductase)
E21+E22	E1	100	100	544	70	544	70	262.782	260.216	0.0141566	0.286476	0.370932	1		1	1	1	PWY-7003: glycerol degradation to butanol
E21+E22	E1	28.6765	31.4286	544	70	156	22	7.86511	9.02323	-0.198178	0.305445	0.386745	1	0.877226	0.674923	1	1	PWY-7094: fatty acid salvage
E21+E22	E1	100	100	544	70	544	70	8155.78	8339.69	-0.0321707	0.208984	0.306109	1		1	1	1	PWY-7111: pyruvate fermentation to isobutanol (engineered)
E21+E22	E1	99.8162	98.5714	544	70	543	69	99.8857	114.775	-0.200456	0.0679734	0.142969	1	7.86957	0.21518	0.972714	1	PWY-7115: C4 photosynthetic carbon assimilation cycle, NAD-ME type
E21+E22	E1	99.8162	98.5714	544	70	543	69	656.226	769.346	-0.229439	0.0452356	0.103716	1	7.86957	0.21518	0.972714	1	PWY-7117: C4 photosynthetic carbon assimilation cycle, PEPCK type
E21+E22	E1	100	100	544	70	544	70	2166.15	2158.01	0.00542886	0.354995	0.421686	1		1	1	1	PWY-7184: pyrimidine deoxyribonucleotides de novo biosynthesis I
E21+E22	E1	100	100	544	70	544	70	2808.09	2863.51	-0.0281957	0.325878	0.402601	1		1	1	1	PWY-7187: pyrimidine deoxyribonucleotides de novo biosynthesis II
E21+E22	E1	100	100	544	70	544	70	1682.63	1680.57	0.00176805	0.291122	0.374511	1		1	1	1	PWY-7196: superpathway of pyrimidine ribonucleosides salvage
E21+E22	E1	100	100	544	70	544	70	1560.21	1504.24	0.0527034	0.269668	0.359793	1		1	1	1	PWY-7197: pyrimidine deoxyribonucleotide phosphorylation
E21+E22	E1	99.6324	100	544	70	542	70	335.062	425.295	-0.344034	0.0225382	0.05944	1	0	1	1	1	PWY-7198: pyrimidine deoxyribonucleotides de novo biosynthesis IV
E21+E22	E1	100	100	544	70	544	70	1596.76	1615.91	-0.0171972	0.467339	0.488952	1		1	1	1	PWY-7199: pyrimidine deoxyribonucleosides salvage
E21+E22	E1	33.2721	34.2857	544	70	181	24	34.4913	36.7311	-0.0907701	0.433453	0.472942	1	0.955693	0.893197	1	1	PWY-7204: pyridoxal 5'-phosphate salvage II (plants)
E21+E22	E1	100	100	544	70	544	70	2326.13	2349.39	-0.014358	0.489863	0.494692	1		1	1	1	PWY-7208: superpathway of pyrimidine nucleobases salvage
E21+E22	E1	84.0074	85.7143	544	70	457	60	79.4965	95.3994	-0.263089	0.311478	0.391946	1	0.875479	0.861969	1	1	PWY-7209: superpathway of pyrimidine ribonucleosides degradation
E21+E22	E1	99.6324	100	544	70	542	70	440.462	540.678	-0.295753	0.0299009	0.0751583	1	0	1	1	1	PWY-7210: pyrimidine deoxyribonucleotides biosynthesis from CTP
E21+E22	E1	100	100	544	70	544	70	1691.83	1648.62	0.0373241	0.354995	0.421686	1		1	1	1	PWY-7211: superpathway of pyrimidine deoxyribonucleotides de novo biosynthesis
E21+E22	E1	100	100	544	70	544	70	11593.6	11742.4	-0.0183985	0.481872	0.494392	1		1	1	1	PWY-7219: adenosine ribonucleotides de novo biosynthesis
E21+E22	E1	100	100	544	70	544	70	3414.42	3493.98	-0.0332292	0.24362	0.336964	1		1	1	1	PWY-7220: adenosine deoxyribonucleotides de novo biosynthesis II
E21+E22	E1	100	100	544	70	544	70	8537.16	8887.41	-0.0580066	0.236278	0.329946	1		1	1	1	PWY-7221: guanosine ribonucleotides de novo biosynthesis
E21+E22	E1	100	100	544	70	544	70	3414.42	3493.98	-0.0332292	0.24362	0.336964	1		1	1	1	PWY-7222: guanosine deoxyribonucleotides de novo biosynthesis II
E21+E22	E1	100	100	544	70	544	70	2882.54	2944.89	-0.0308693	0.391019	0.448518	1		1	1	1	PWY-7228: superpathway of guanosine nucleotides de novo biosynthesis I
E21+E22	E1	100	100	544	70	544	70	6622.01	6793.54	-0.036893	0.260988	0.352837	1		1	1	1	PWY-7229: superpathway of adenosine nucleotides de novo biosynthesis I
E21+E22	E1	100	100	544	70	544	70	1398.32	1420.85	-0.0230616	0.0992263	0.18706	1		1	1	1	PWY-7234: inosine-5'-phosphate biosynthesis III
E21+E22	E1	51.2868	40	544	70	279	28	61.1309	61.1209	0.000234624	0.037761	0.0904488	1	1.57925	0.0982475	0.624987	1	PWY-7235: superpathway of ubiquinol-6 biosynthesis (eukaryotic)
E21+E22	E1	100	100	544	70	544	70	416.479	464.548	-0.157584	0.283317	0.37024	1		1	1	1	PWY-7237: myo-, chiro- and scillo-inositol degradation
E21+E22	E1	100	100	544	70	544	70	1434.98	1427.81	0.00722397	0.16188	0.262829	1		1	1	1	PWY-7242: D-fructuronate degradation
E21+E22	E1	100	100	544	70	544	70	4982.36	5195.23	-0.0603598	0.339399	0.410831	1		1	1	1	PWY-724: superpathway of L-lysine, L-threonine and L-methionine biosynthesis II
E21+E22	E1	32.3529	24.2857	544	70	176	17	40.2979	86.3199	-1.09899	0.136709	0.234688	1	1.49105	0.217939	0.972714	1	PWY-7254: TCA cycle VII (acetate-producers)
E21+E22	E1	24.6324	22.8571	544	70	134	16	13.1917	14.7247	-0.158608	0.378645	0.440527	1	1.10305	0.882578	1	1	PWY-7269: NAD/NADP-NADH/NADPH mitochondrial interconversion (yeast)
E21+E22	E1	99.8162	100	544	70	543	70	2278.96	2176.47	0.0663826	0.331832	0.406478	1	0	1	1	1	PWY-7282: 4-amino-2-methyl-5-phosphomethylpyrimidine biosynthesis (yeast)
E21+E22	E1	31.8015	24.2857	544	70	173	17	50.8263	26.4553	0.94202	0.0554364	0.121364	1	1.45378	0.218813	0.972714	1	PWY-7286: 7-(3-amino-3-carboxypropyl)-wyosine biosynthesis
E21+E22	E1	37.5	34.2857	544	70	204	24	9.5997	10.3944	-0.114739	0.341521	0.412419	1	1.15	0.693704	1	1	PWY-7315: dTDP-N-acetylthomosamine biosynthesis
E21+E22	E1	99.0809	97.1429	544	70	539	68	410.922	409.962	0.0033719	0.403163	0.452626	1	3.17059	0.184735	0.895525	1	PWY-7323: superpathway of GDP-mannose-derived O-antigen building blocks biosynthesis
E21+E22	E1	95.5882	84.2857	544	70	520	59	127.412	138.728	-0.122755	0.0530346	0.117113	1	4.03955	0.000866579	0.0167346	0.882177	PWY-7328: superpathway of UDP-glucose-derived O-antigen building blocks biosynthesis
E21+E22	E1	100	100	544	70	544	70	3304.02	3356.11	-0.022566	0.0986031	0.18623	1		1	1	1	PWY-7357: thiamin formation from pyrithiamine and oxythiamine (yeast)
E21+E22	E1	91.1765	81.4286	544	70	496	57	95.2215	100.719	-0.0809817	0.16816	0.265406	1	2.35673	0.0175818	0.17721	1	PWY-7371: 1,4-dihydroxy-6-naphthoate biosynthesis II
E21+E22	E1	100	100	544	70	544	70	1451.01	1233.56	0.234229	0.00954019	0.0303497	1		1	1	1	PWY-7383: anaerobic energy metabolism (invertebrates, cytosol)
E21+E22	E1	99.0809	97.1429	544	70	539	68	151.907	145.612	0.061067	0.17172	0.268322	1	3.17059	0.184735	0.895525	1	PWY-7388: octanoyl-[acyl-carrier protein] biosynthesis (mitochondria, yeast)
E21+E22	E1	56.9853	54.2857	544	70	310	38	142.608	97.3341	0.551033	0.148314	0.249149	1	1.11561	0.701622	1	1	PWY-7392: taxadiene biosynthesis (engineered)
E21+E22	E1	100	100	544	70	544	70	1965.18	2271.22	-0.208805	0.10759	0.196638	1		1	1	1	PWY-7400: L-arginine biosynthesis IV (archaebacteria)
E21+E22	E1	99.6324	97.1429	544	70	542	68	1053.05	956.36	0.138949	0.145276	0.245194	1	7.97059	0.0660585	0.480339	1	PWY-7456: mannan degradation
E21+E22	E1	99.8162	100	544	70	543	70	276.677	282.203	-0.0285306	0.445767	0.479188	1	0	1	1	1	PWY-7539: 6-hydroxymethyl-dihydropterin diphosphate biosynthesis III (Chlamydia)
E21+E22	E1	97.2426	100	544	70	529	70	661.959	711.994	-0.105125	0.279933	0.368399	1	0	0.398002	1	1	PWY-7560: methylerythritol phosphate pathway II
E21+E22	E1	100	100	544	70	544	70	3108.34	3138.61	-0.0139797	0.381433	0.440883	1		1	1	1	PWY-7663: gondoate biosynthesis (anaerobic)
E21+E22	E1	99.0809	97.1429	544	70	539	68	222.251	212.428	0.0652193	0.167739	0.265401	1	3.17059	0.184735	0.895525	1	PWY-7664: oleate biosynthesis IV (anaerobic)
E21+E22	E1	90.0735	85.7143	544	70	490	60	111.22	124.611	-0.164022	0.455092	0.482085	1	1.51235	0.29607	1	1	PWY-821: superpathway of sulfur amino acid biosynthesis (Saccharomyces cerevisiae)
E21+E22	E1	100	100	544	70	544	70	3238.1	3371.37	-0.0581878	0.44407	0.477868	1		1	1	1	PWY-841: superpathway of purine nucleotides de novo biosynthesis I
E21+E22	E1	100	100	544	70	544	70	109.89	122.978	-0.162343	0.0951664	0.181422	1		1	1	1	PWY0-1061: superpathway of L-alanine biosynthesis
E21+E22	E1	37.5	35.7143	544	70	204	25	12.1799	13.2507	-0.121561	0.38155	0.440883	1	1.08	0.794667	1	1	PWY0-1241: ADP-L-glycero-&beta;-D-manno-heptose biosynthesis
E21+E22	E1	97.9779	97.1429	544	70	533	68	558.592	613.588	-0.135476	0.253139	0.345437	1	1.42513	0.651243	1	1	PWY0-1261: anhydromuropeptides recycling
E21+E22	E1	100	100	544	70	544	70	5683.73	5611.85	0.018362	0.493575	0.495522	1		1	1	1	PWY0-1296: purine ribonucleosides degradation
E21+E22	E1	100	100	544	70	544	70	467.151	456.626	0.0328745	0.166307	0.265401	1		1	1	1	PWY0-1297: superpathway of purine deoxyribonucleosides degradation
E21+E22	E1	100	100	544	70	544	70	357.521	323.367	0.144857	0.452848	0.48121	1		1	1	1	PWY0-1298: superpathway of pyrimidine deoxyribonucleosides degradation
E21+E22	E1	100	100	544	70	544	70	6674.91	6968.47	-0.0620947	0.343603	0.413289	1		1	1	1	PWY0-1319: CDP-diacylglycerol biosynthesis II
E21+E22	E1	20.4044	21.4286	544	70	111	15	13.6443	14.8624	-0.123363	0.405004	0.452765	1	0.939954	0.875136	1	1	PWY0-1338: polymyxin resistance
E21+E22	E1	45.4044	48.5714	544	70	247	34	26.0385	28.4486	-0.127712	0.280516	0.368399	1	0.88057	0.702456	1	1	PWY0-1415: superpathway of heme biosynthesis from uroporphyrinogen-III
E21+E22	E1	90.9926	92.8571	544	70	495	65	192.295	221.754	-0.205634	0.076464	0.155681	1	0.77708	0.822293	1	1	PWY0-1479: tRNA processing
E21+E22	E1	25.7353	31.4286	544	70	140	22	5.02481	4.23561	0.246501	0.18046	0.277925	1	0.756076	0.315143	1	1	PWY0-1533: methylphosphonate degradation I
E21+E22	E1	100	100	544	70	544	70	2102.05	2006.12	0.0673935	0.205504	0.304074	1		1	1	1	PWY0-1586: peptidoglycan maturation (meso-diaminopimelate containing)
E21+E22	E1	100	100	544	70	544	70	2348.79	2294.97	0.0334429	0.331832	0.406478	1		1	1	1	PWY0-162: superpathway of pyrimidine ribonucleotides de novo biosynthesis
E21+E22	E1	100	100	544	70	544	70	2886.15	2966.27	-0.039505	0.337828	0.410831	1		1	1	1	PWY0-166: superpathway of pyrimidine deoxyribonucleotides de novo biosynthesis (E. coli)
E21+E22	E1	22.6103	24.2857	544	70	123	17	9.23748	8.56562	0.108943	0.39664	0.448791	1	0.910857	0.762775	1	1	PWY0-41: allantoin degradation IV (anaerobic)
E21+E22	E1	28.3088	32.8571	544	70	154	23	14.7774	10.9496	0.432511	0.329658	0.406066	1	0.806912	0.483352	1	1	PWY0-42: 2-methylcitrate cycle I
E21+E22	E1	100	100	544	70	544	70	1154.11	1312.09	-0.185087	0.212291	0.308592	1		1	1	1	PWY0-781: aspartate superpathway
E21+E22	E1	99.8162	100	544	70	543	70	1803.26	1718.9	0.0691265	0.0682087	0.143168	1	0	1	1	1	PWY0-845: superpathway of pyridoxal 5'-phosphate biosynthesis and salvage
E21+E22	E1	99.0809	97.1429	544	70	539	68	192.718	185.011	0.0588801	0.167022	0.265401	1	3.17059	0.184735	0.895525	1	PWY0-862: (5Z)-dodec-5-enoate biosynthesis
E21+E22	E1	68.5662	74.2857	544	70	373	52	31.7162	42.3832	-0.418271	0.0618927	0.132926	1	0.755061	0.409176	1	1	PWY490-3: nitrate reduction VI (assimilatory)
E21+E22	E1	100	100	544	70	544	70	740.109	706.135	0.067794	0.478735	0.493272	1		1	1	1	PWY4FS-7: phosphatidylglycerol biosynthesis I (plastidic)
E21+E22	E1	100	100	544	70	544	70	740.109	706.135	0.067794	0.478735	0.493272	1		1	1	1	PWY4FS-8: phosphatidylglycerol biosynthesis II (non-plastidic)
E21+E22	E1	100	100	544	70	544	70	287.636	294.788	-0.0354308	0.48387	0.494392	1		1	1	1	PWY4LZ-257: superpathway of fermentation (Chlamydomonas reinhardtii)
E21+E22	E1	38.6029	38.5714	544	70	210	27	9.72416	9.71805	0.000906668	0.478673	0.493272	1	1.00133	1	1	1	PWY66-389: phytol degradation
E21+E22	E1	79.9632	78.5714	544	70	435	55	88.5892	108.519	-0.292748	0.163084	0.264361	1	1.08841	0.75365	1	1	PWY66-398: TCA cycle III (animals)
E21+E22	E1	100	100	544	70	544	70	525.711	554.149	-0.0760052	0.48387	0.494392	1		1	1	1	PWY66-399: gluconeogenesis III
E21+E22	E1	100	100	544	70	544	70	582.552	659.523	-0.179036	0.106798	0.195933	1		1	1	1	PWY66-400: glycolysis VI (metazoan)
E21+E22	E1	99.8162	100	544	70	543	70	836.537	842.155	-0.00965587	0.115612	0.208306	1	0	1	1	1	PWY66-409: superpathway of purine nucleotide salvage
E21+E22	E1	100	100	544	70	544	70	4237.66	4219.6	0.00616036	0.440396	0.47588	1		1	1	1	PWY66-422: D-galactose degradation V (Leloir pathway)
E21+E22	E1	99.0809	97.1429	544	70	539	68	230.034	220.093	0.0637381	0.168819	0.266033	1	3.17059	0.184735	0.895525	1	PWYG-321: mycolate biosynthesis
E21+E22	E1	88.7868	92.8571	544	70	483	65	243.079	359.293	-0.563733	0.00538758	0.0191099	1	0.609079	0.41176	1	1	PYRIDNUCSAL-PWY: NAD salvage pathway I
E21+E22	E1	100	100	544	70	544	70	2629.86	2684.79	-0.0298237	0.448597	0.479426	1		1	1	1	PYRIDNUCSYN-PWY: NAD biosynthesis I (from aspartate)
E21+E22	E1	99.8162	100	544	70	543	70	1439.14	1324.09	0.120204	0.0687757	0.144061	1	0	1	1	1	PYRIDOXSYN-PWY: pyridoxal 5'-phosphate biosynthesis I
E21+E22	E1	51.2868	51.4286	544	70	279	36	31.8035	30.6708	0.0523162	0.390434	0.448518	1	0.99434	1	1	1	REDCITCYC: TCA cycle VIII (helicobacter)
E21+E22	E1	100	100	544	70	544	70	1410.49	1482.05	-0.0713925	0.22776	0.322661	1		1	1	1	RHAMCAT-PWY: L-rhamnose degradation I
E21+E22	E1	100	100	544	70	544	70	1197.58	1133.59	0.0792222	0.198449	0.29709	1		1	1	1	RIBOSYN2-PWY: flavin biosynthesis I (bacteria and plants)
E21+E22	E1	61.0294	51.4286	544	70	332	36	34.9576	36.8844	-0.0774042	0.152091	0.251345	1	1.47904	0.15363	0.847475	1	RUMP-PWY: formaldehyde oxidation I
E21+E22	E1	100	100	544	70	544	70	1657.03	1795.4	-0.115706	0.228193	0.322661	1		1	1	1	SALVADEHYPOX-PWY: adenosine nucleotides degradation II
E21+E22	E1	100	100	544	70	544	70	2391.16	2461.5	-0.0418228	0.280175	0.368399	1		1	1	1	SER-GLYSYN-PWY: superpathway of L-serine and glycine biosynthesis I
E21+E22	E1	98.8971	95.7143	544	70	538	67	232.638	217.512	0.0969921	0.274181	0.36296	1	4.01493	0.0720416	0.505782	1	SO4ASSIM-PWY: sulfate reduction I (assimilatory)
E21+E22	E1	98.8971	95.7143	544	70	538	67	427.053	415.086	0.0410054	0.317922	0.397598	1	4.01493	0.0720416	0.505782	1	SULFATE-CYS-PWY: superpathway of sulfate assimilation and cysteine biosynthesis
E21+E22	E1	39.8897	42.8571	544	70	217	30	40.637	37.6114	0.111625	0.322291	0.400113	1	0.884811	0.697974	1	1	TCA-GLYOX-BYPASS: superpathway of glyoxylate bypass and TCA
E21+E22	E1	100	100	544	70	544	70	1183.76	1218.92	-0.0422198	0.460513	0.485303	1		1	1	1	TCA: TCA cycle I (prokaryotic)
E21+E22	E1	22.6103	30	544	70	123	21	16.3394	13.3524	0.291255	0.0980713	0.18557	1	0.68171	0.178525	0.895525	1	TEICHOICACID-PWY: teichoic acid (poly-glycerol) biosynthesis
E21+E22	E1	100	100	544	70	544	70	469.166	489.428	-0.0609983	0.34862	0.416544	1		1	1	1	THISYN-PWY: superpathway of thiamin diphosphate biosynthesis I
E21+E22	E1	100	100	544	70	544	70	1695	1710.1	-0.0127973	0.42716	0.468588	1		1	1	1	THISYNARA-PWY: superpathway of thiamin diphosphate biosynthesis III (eukaryotes)
E21+E22	E1	100	100	544	70	544	70	3229.32	3401.04	-0.074747	0.372732	0.43614	1		1	1	1	THRESYN-PWY: superpathway of L-threonine biosynthesis
E21+E22	E1	100	100	544	70	544	70	7755.59	7798.27	-0.00791722	0.363021	0.428518	1		1	1	1	TRNA-CHARGING-PWY: tRNA charging
E21+E22	E1	100	100	544	70	544	70	2594.34	2762.8	-0.0907668	0.206524	0.30514	1		1	1	1	TRPSYN-PWY: L-tryptophan biosynthesis
E21+E22	E1	22.0588	24.2857	544	70	120	17	19.197	12.5801	0.609746	0.396375	0.448791	1	0.882353	0.649816	1	1	UBISYN-PWY: superpathway of ubiquinol-8 biosynthesis (prokaryotic)
E21+E22	E1	99.8162	98.5714	544	70	543	69	513.021	596.335	-0.217106	0.220159	0.317004	1	7.86957	0.21518	0.972714	1	UDPNAGSYN-PWY: UDP-N-acetyl-D-glucosamine biosynthesis I
E21+E22	E1	100	100	544	70	544	70	8155.78	8339.69	-0.0321707	0.208984	0.306109	1		1	1	1	VALSYN-PWY: L-valine biosynthesis
E21+E22	E3	100	100	544	161	544	161	2819.99	2872.11	-0.0264238	0.22517	0.321491	1		1	1	1	1CMET2-PWY: N10-formyl-tetrahydrofolate biosynthesis
E21+E22	E3	100	100	544	161	544	161	2332.34	2083.15	0.163009	0.00085274	0.00403763	0.86809		1	1	1	ANAEROFRUCAT-PWY: homolactic fermentation
E21+E22	E3	100	100	544	161	544	161	4864.44	4669.79	0.0589171	0.00319892	0.0123927	1		1	1	1	ANAGLYCOLYSIS-PWY: glycolysis III (from glucose)
E21+E22	E3	100	99.3789	544	161	544	160	734.49	698.093	0.0733246	0.0259839	0.067182	1	inf	0.228369	0.992914	1	ARG+POLYAMINE-SYN: superpathway of arginine and polyamine biosynthesis
E21+E22	E3	100	100	544	161	544	161	560.622	491.15	0.190865	0.00189878	0.00808771	1		1	1	1	ARGININE-SYN4-PWY: L-ornithine de novo biosynthesis
E21+E22	E3	43.3824	63.354	544	161	236	102	26.5745	40.3188	-0.601407	6.12501e-08	1.88947e-06	6.23526e-05	0.443214	9.78824e-06	0.00110716	0.00996443	ARGORNPROST-PWY: arginine, ornithine and proline interconversion
E21+E22	E3	100	100	544	161	544	161	1746.01	1545.64	0.17586	0.0105812	0.0329408	1		1	1	1	ARGSYN-PWY: L-arginine biosynthesis I (via L-ornithine)
E21+E22	E3	100	100	544	161	544	161	749.149	660.255	0.18223	0.0352568	0.0848496	1		1	1	1	ARGSYNBSUB-PWY: L-arginine biosynthesis II (acetyl cycle)
E21+E22	E3	100	100	544	161	544	161	7503.09	6643.47	0.175549	4.47274e-08	1.46879e-06	4.55325e-05		1	1	1	ARO-PWY: chorismate biosynthesis I
E21+E22	E3	100	100	544	161	544	161	1663.02	1514.89	0.134591	0.000200487	0.00122949	0.204096		1	1	1	ASPASN-PWY: superpathway of L-aspartate and L-asparagine biosynthesis
E21+E22	E3	22.9779	37.2671	544	161	125	60	15.0971	15.2728	-0.0166971	0.000101429	0.000697666	0.103255	0.502188	0.00049088	0.0128132	0.499716	AST-PWY: L-arginine degradation II (AST pathway)
E21+E22	E3	99.0809	98.7578	544	161	539	159	265.786	276.77	-0.0584209	0.13959	0.238427	1	1.35597	0.661815	1	1	BIOTIN-BIOSYNTHESIS-PWY: biotin biosynthesis I
E21+E22	E3	100	100	544	161	544	161	5112.26	4739.3	0.109286	0.000167523	0.00104625	0.170538		1	1	1	BRANCHED-CHAIN-AA-SYN-PWY: superpathway of branched amino acid biosynthesis
E21+E22	E3	100	100	544	161	544	161	6262.74	5676.96	0.141676	1.32761e-06	2.25251e-05	0.0013515		1	1	1	CALVIN-PWY: Calvin-Benson-Bassham cycle
E21+E22	E3	99.4485	100	544	161	541	161	315.718	292.174	0.111805	0.032188	0.0791483	1	0	1	1	1	CENTFERM-PWY: pyruvate fermentation to butanoate
E21+E22	E3	100	100	544	161	544	161	403.794	441.709	-0.129474	0.0187442	0.0507489	1		1	1	1	CITRULBIO-PWY: L-citrulline biosynthesis
E21+E22	E3	100	100	544	161	544	161	7407.6	6991.57	0.0833898	0.00867785	0.0288016	1		1	1	1	COA-PWY-1: coenzyme A biosynthesis II (mammalian)
E21+E22	E3	100	100	544	161	544	161	2211.34	2081.61	0.0872183	0.0104585	0.0326586	1		1	1	1	COA-PWY: coenzyme A biosynthesis I
E21+E22	E3	100	100	544	161	544	161	1700.35	1284.29	0.404859	2.11814e-09	1.54019e-07	2.15626e-06		1	1	1	COBALSYN-PWY: adenosylcobalamin salvage from cobinamide I
E21+E22	E3	99.2647	99.3789	544	161	540	160	593.855	585.95	0.019334	0.0703872	0.146264	1	0.84375	1	1	1	COLANSYN-PWY: colanic acid building blocks biosynthesis
E21+E22	E3	100	100	544	161	544	161	7136.77	6291.78	0.181803	1.06213e-08	4.5052e-07	1.08125e-05		1	1	1	COMPLETE-ARO-PWY: superpathway of aromatic amino acid biosynthesis
E21+E22	E3	92.4632	83.2298	544	161	503	134	99.8924	95.7279	0.0614353	0.00191632	0.0081284	1	2.47197	0.00118378	0.0211419	1	CRNFORCAT-PWY: creatinine degradation I
E21+E22	E3	100	100	544	161	544	161	947.261	1105.59	-0.222985	0.00377952	0.0142822	1		1	1	1	DAPLYSINESYN-PWY: L-lysine biosynthesis I
E21+E22	E3	100	100	544	161	544	161	3139.98	2964.05	0.0831855	0.00131607	0.00596313	1		1	1	1	DENOVOPURINE2-PWY: superpathway of purine nucleotides de novo biosynthesis II
E21+E22	E3	100	100	544	161	544	161	4550.9	3891.86	0.225692	8.18743e-09	4.1674e-07	8.33481e-06		1	1	1	DTDPRHAMSYN-PWY: dTDP-L-rhamnose biosynthesis I
E21+E22	E3	20.2206	32.2981	544	161	110	52	12.016	11.8194	0.0237931	0.000821394	0.00396293	0.836179	0.531283	0.0019261	0.0280213	1	ECASYN-PWY: enterobacterial common antigen biosynthesis
E21+E22	E3	25.3676	35.4037	544	161	138	57	112.201	128.154	-0.191792	0.00321383	0.0123927	1	0.620171	0.0158721	0.161578	1	ENTBACSYN-PWY: enterobactin biosynthesis
E21+E22	E3	97.2426	96.2733	544	161	529	155	158.477	189.797	-0.260189	0.000642703	0.00332118	0.654271	1.36516	0.596697	1	1	FAO-PWY: fatty acid &beta;-oxidation I
E21+E22	E3	99.0809	98.7578	544	161	539	159	251.056	264.902	-0.0774481	0.151153	0.250749	1	1.35597	0.661815	1	1	FASYN-ELONG-PWY: fatty acid elongation -- saturated
E21+E22	E3	99.0809	98.7578	544	161	539	159	162.855	176.478	-0.115907	0.126345	0.222141	1	1.35597	0.661815	1	1	FASYN-INITIAL-PWY: superpathway of fatty acid biosynthesis initiation (E. coli)
E21+E22	E3	99.8162	100	544	161	543	161	792.644	822.833	-0.0539272	0.143941	0.243813	1	0	1	1	1	FERMENTATION-PWY: mixed acid fermentation
E21+E22	E3	99.0809	98.1366	544	161	539	158	528.407	539.124	-0.028969	0.396786	0.448791	1	2.04684	0.392015	1	1	FOLSYN-PWY: superpathway of tetrahydrofolate biosynthesis and salvage
E21+E22	E3	91.9118	96.2733	544	161	500	155	73.6866	79.5544	-0.110539	0.0142445	0.041431	1	0.439883	0.0785632	0.54779	1	FUC-RHAMCAT-PWY: superpathway of fucose and rhamnose degradation
E21+E22	E3	97.9779	98.7578	544	161	533	159	172.832	235.915	-0.448898	1.02543e-05	0.000119987	0.0104388	0.609491	0.7427	1	1	FUCCAT-PWY: fucose degradation
E21+E22	E3	100	100	544	161	544	161	1728.33	1248.5	0.469181	1.29743e-13	3.30197e-11	1.32079e-10		1	1	1	GALACT-GLUCUROCAT-PWY: superpathway of hexuronide and hexuronate degradation
E21+E22	E3	39.7059	54.0373	544	161	216	87	14.1792	17.6624	-0.31691	0.00033655	0.00187042	0.342608	0.560135	0.00148868	0.0242049	1	GALACTARDEG-PWY: D-galactarate degradation I
E21+E22	E3	100	100	544	161	544	161	1536.62	1201.51	0.354919	7.0308e-11	1.02248e-08	7.15735e-08		1	1	1	GALACTUROCAT-PWY: D-galacturonate degradation I
E21+E22	E3	100	100	544	161	544	161	1383.51	1089.17	0.345095	8.01115e-10	7.41395e-08	8.15535e-07		1	1	1	GLCMANNANAUT-PWY: superpathway of N-acetylglucosamine, N-acetylmannosamine and N-acetylneuraminate degradation
E21+E22	E3	40.4412	55.2795	544	161	220	89	14.6307	18.2722	-0.320656	0.000147091	0.000930055	0.149739	0.549313	0.00109896	0.0199775	1	GLUCARDEG-PWY: D-glucarate degradation I
E21+E22	E3	39.7059	54.0373	544	161	216	87	14.1792	17.6624	-0.31691	0.00033655	0.00187042	0.342608	0.560135	0.00148868	0.0242049	1	GLUCARGALACTSUPER-PWY: superpathway of D-glucarate and D-galactarate degradation
E21+E22	E3	100	100	544	161	544	161	486.949	533.299	-0.131175	0.00400352	0.0149838	1		1	1	1	GLUCONEO-PWY: gluconeogenesis I
E21+E22	E3	51.4706	59.0062	544	161	280	95	22.4291	40.2028	-0.841925	0.00148294	0.00659226	1	0.736842	0.105543	0.643962	1	GLUCOSE1PMETAB-PWY: glucose and glucose-1-phosphate degradation
E21+E22	E3	100	100	544	161	544	161	1718.58	1244.5	0.465658	2.83103e-14	9.60664e-12	2.88199e-11		1	1	1	GLUCUROCAT-PWY: superpathway of &beta;-D-glucuronide and D-glucuronate degradation
E21+E22	E3	72.4265	84.472	544	161	394	136	58.5126	71.5046	-0.289289	0.000185939	0.00115418	0.189286	0.482843	0.00176279	0.0276081	1	GLUDEG-I-PWY: GABA shunt
E21+E22	E3	100	100	544	161	544	161	442.652	379.76	0.221084	0.0149931	0.0432378	1		1	1	1	GLUTORN-PWY: L-ornithine biosynthesis
E21+E22	E3	99.4485	100	544	161	541	161	256.996	227.542	0.175615	0.0126212	0.0373641	1	0	1	1	1	GLYCOCAT-PWY: glycogen degradation I (bacterial)
E21+E22	E3	100	100	544	161	544	161	2114.72	1751.23	0.272094	2.09226e-06	3.22715e-05	0.00212992		1	1	1	GLYCOGENSYNTH-PWY: glycogen biosynthesis I (from ADP-D-Glucose)
E21+E22	E3	47.2426	65.8385	544	161	257	106	13.3961	17.004	-0.344069	5.84354e-06	7.34411e-05	0.00594873	0.464631	3.44681e-05	0.00206403	0.0350885	GLYCOL-GLYOXDEG-PWY: superpathway of glycol metabolism and degradation
E21+E22	E3	100	100	544	161	544	161	401.215	441.643	-0.138505	0.0714627	0.148165	1		1	1	1	GLYCOLYSIS-E-D: superpathway of glycolysis and Entner-Doudoroff
E21+E22	E3	39.8897	54.6584	544	161	217	88	75.1943	104.714	-0.477756	7.24235e-05	0.000542111	0.0737271	0.550493	0.00108773	0.0199775	1	GLYCOLYSIS-TCA-GLYOX-BYPASS: superpathway of glycolysis, pyruvate dehydrogenase, TCA, and glyoxylate bypass
E21+E22	E3	100	100	544	161	544	161	1314.59	1143.7	0.200898	0.00418467	0.0156044	1		1	1	1	GLYCOLYSIS: glycolysis I (from glucose 6-phosphate)
E21+E22	E3	53.4926	67.7019	544	161	291	109	28.6871	46.3335	-0.691652	5.13435e-05	0.000421513	0.0522677	0.548718	0.00149795	0.0242049	1	GLYOXYLATE-BYPASS: glyoxylate cycle
E21+E22	E3	100	100	544	161	544	161	209.615	167.423	0.324247	3.63545e-07	7.40177e-06	0.000370089		1	1	1	GOLPDLCAT-PWY: superpathway of glycerol degradation to 1,3-propanediol
E21+E22	E3	95.7721	93.7888	544	161	521	151	73.6056	69.987	0.0727283	0.323967	0.401215	1	1.50014	0.292274	1	1	HEME-BIOSYNTHESIS-II: heme biosynthesis I (aerobic)
E21+E22	E3	99.4485	100	544	161	541	161	182.128	174.372	0.062782	0.0269287	0.0690515	1	0	1	1	1	HEMESYN2-PWY: heme biosynthesis II (anaerobic)
E21+E22	E3	100	100	544	161	544	161	546.679	534.293	0.033065	0.448213	0.479426	1		1	1	1	HEXITOLDEGSUPER-PWY: superpathway of hexitol degradation (bacteria)
E21+E22	E3	100	100	544	161	544	161	2138.14	2439.29	-0.190107	9.58925e-06	0.000114845	0.00976186		1	1	1	HISDEG-PWY: L-histidine degradation I
E21+E22	E3	100	100	544	161	544	161	2412.21	2164.25	0.156489	0.000385182	0.00208572	0.392115		1	1	1	HISTSYN-PWY: L-histidine biosynthesis
E21+E22	E3	100	100	544	161	544	161	1778.12	1745.13	0.0270152	0.108574	0.19808	1		1	1	1	HOMOSER-METSYN-PWY: L-methionine biosynthesis I
E21+E22	E3	100	100	544	161	544	161	1664.88	1708.68	-0.0374661	0.389586	0.448518	1		1	1	1	HSERMETANA-PWY: L-methionine biosynthesis III
E21+E22	E3	100	100	544	161	544	161	8155.78	7298.96	0.160132	2.05623e-07	4.65166e-06	0.000209325		1	1	1	ILEUSYN-PWY: L-isoleucine biosynthesis I (from threonine)
E21+E22	E3	20.9559	38.5093	544	161	114	62	10.9735	11.3081	-0.0433369	5.26795e-06	6.78832e-05	0.00536277	0.423331	1.19795e-05	0.00121951	0.0121951	KDO-NAGLIPASYN-PWY: superpathway of (Kdo)2-lipid A biosynthesis
E21+E22	E3	46.3235	59.6273	544	161	252	96	20.5126	28.6835	-0.483712	0.000204922	0.00124917	0.208611	0.584332	0.00310302	0.0399858	1	KETOGLUCONMET-PWY: ketogluconate metabolism
E21+E22	E3	97.2426	98.7578	544	161	529	159	277.019	280.115	-0.0160349	0.477604	0.493272	1	0.443606	0.385387	1	1	LACTOSECAT-PWY: lactose and galactose degradation I
E21+E22	E3	100	100	544	161	544	161	2984.6	2841.32	0.0709759	0.0536117	0.118079	1		1	1	1	MET-SAM-PWY: superpathway of S-adenosyl-L-methionine biosynthesis
E21+E22	E3	32.1691	49.0683	544	161	175	79	56.1159	82.4251	-0.554676	4.05497e-07	8.09404e-06	0.000412796	0.492264	0.00012072	0.00472667	0.122893	METHANOGENESIS-PWY: methanogenesis from H2 and CO2
E21+E22	E3	32.1691	50.3106	544	161	175	81	12.2635	11.6465	0.0744723	5.13145e-05	0.000421513	0.0522381	0.4684	3.75687e-05	0.00212472	0.0382449	METHGLYUT-PWY: superpathway of methylglyoxal degradation
E21+E22	E3	100	100	544	161	544	161	2836.31	2828.86	0.00379414	0.104208	0.193937	1		1	1	1	METSYN-PWY: L-homoserine and L-methionine biosynthesis
E21+E22	E3	80.5147	85.7143	544	161	438	138	43.9575	94.7999	-1.10878	7.04073e-07	1.32227e-05	0.000716746	0.688679	0.163419	0.884896	1	NAD-BIOSYNTHESIS-II: NAD salvage pathway II
E21+E22	E3	95.2206	93.1677	544	161	518	150	140.001	124.233	0.172382	0.00528195	0.0188668	1	1.46103	0.31586	1	1	NAGLIPASYN-PWY: lipid IVA biosynthesis
E21+E22	E3	100	100	544	161	544	161	7827.24	7112.97	0.138051	7.40079e-07	1.34536e-05	0.000753401		1	1	1	NONMEVIPP-PWY: methylerythritol phosphate pathway I
E21+E22	E3	100	100	544	161	544	161	4871.42	4313.97	0.175324	1.31458e-07	3.26401e-06	0.000133824		1	1	1	NONOXIPENT-PWY: pentose phosphate pathway (non-oxidative branch)
E21+E22	E3	99.8162	98.1366	544	161	543	158	876.27	934.329	-0.092556	0.276753	0.365415	1	10.3101	0.0390292	0.315331	1	OANTIGEN-PWY: O-antigen building blocks biosynthesis (E. coli)
E21+E22	E3	36.9485	53.4161	544	161	201	86	73.7279	94.3072	-0.355157	2.45698e-05	0.000235962	0.025012	0.511052	0.000247282	0.00812043	0.251733	P105-PWY: TCA cycle IV (2-oxoglutarate decarboxylase)
E21+E22	E3	79.2279	90.6832	544	161	431	146	89.4352	309.313	-1.79015	6.20824e-15	3.16e-12	6.31999e-12	0.391866	0.000680824	0.0152573	0.693079	P108-PWY: pyruvate fermentation to propanoate I
E21+E22	E3	89.8897	88.8199	544	161	489	143	33.3755	34.6949	-0.0559347	0.150709	0.250749	1	1.11914	0.661563	1	1	P122-PWY: heterolactic fermentation
E21+E22	E3	97.0588	94.4099	544	161	528	152	212.498	236.891	-0.156776	0.472342	0.491158	1	1.95395	0.142017	0.812008	1	P124-PWY: Bifidobacterium shunt
E21+E22	E3	100	100	544	161	544	161	246.553	271.969	-0.141542	0.0138953	0.0406478	1		1	1	1	P161-PWY: acetylene degradation
E21+E22	E3	100	100	544	161	544	161	264.202	246.714	0.0988045	0.0448348	0.103354	1		1	1	1	P162-PWY: L-glutamate degradation V (via hydroxyglutarate)
E21+E22	E3	81.0662	92.5466	544	161	441	149	30.5742	43.8575	-0.520509	9.06406e-10	7.68934e-08	9.22721e-07	0.344823	0.000375096	0.0103202	0.381848	P163-PWY: L-lysine fermentation to acetate and butanoate
E21+E22	E3	100	99.3789	544	161	544	160	311.139	341.395	-0.133882	0.0301467	0.0754038	1	inf	0.228369	0.992914	1	P164-PWY: purine nucleobases degradation I (anaerobic)
E21+E22	E3	100	100	544	161	544	161	216.607	222.91	-0.0413807	0.315629	0.396679	1		1	1	1	P185-PWY: formaldehyde assimilation III (dihydroxyacetone cycle)
E21+E22	E3	23.7132	36.646	544	161	129	59	5.68267	4.96864	0.19372	0.000722338	0.00351837	0.73534	0.53739	0.00159991	0.0254485	1	P221-PWY: octane oxidation
E21+E22	E3	46.6912	52.1739	544	161	254	84	23.1702	28.1916	-0.282996	0.082104	0.163886	1	0.802874	0.243277	1	1	P23-PWY: reductive TCA cycle I
E21+E22	E3	100	100	544	161	544	161	1109.73	1160.79	-0.0648889	0.0526107	0.11643	1		1	1	1	P4-PWY: superpathway of L-lysine, L-threonine and L-methionine biosynthesis I
E21+E22	E3	100	100	544	161	544	161	831.004	940.822	-0.179066	0.000845084	0.00403763	0.860296		1	1	1	P42-PWY: incomplete reductive TCA cycle
E21+E22	E3	100	100	544	161	544	161	494.88	522.751	-0.0790455	0.0729162	0.149957	1		1	1	1	P441-PWY: superpathway of N-acetylneuraminate degradation
E21+E22	E3	100	100	544	161	544	161	311.335	306.011	0.0248848	0.425656	0.46836	1		1	1	1	P461-PWY: hexitol fermentation to lactate, formate, ethanol and acetate
E21+E22	E3	100	100	544	161	544	161	5472.07	4997.44	0.130898	2.64888e-05	0.000249682	0.0269656		1	1	1	PANTO-PWY: phosphopantothenate biosynthesis I
E21+E22	E3	100	100	544	161	544	161	3135.43	2890.37	0.117411	0.00123454	0.00563571	1		1	1	1	PANTOSYN-PWY: pantothenate and coenzyme A biosynthesis I
E21+E22	E3	100	100	544	161	544	161	936.228	866.234	0.112102	0.0127511	0.037625	1		1	1	1	PENTOSE-P-PWY: pentose phosphate pathway
E21+E22	E3	100	100	544	161	544	161	8040.59	7552.02	0.0904381	0.00492791	0.0180407	1		1	1	1	PEPTIDOGLYCANSYN-PWY: peptidoglycan biosynthesis I (meso-diaminopimelate containing)
E21+E22	E3	100	100	544	161	544	161	1062.04	966.613	0.135821	0.0123365	0.0369369	1		1	1	1	PHOSLIPSYN-PWY: superpathway of phospholipid biosynthesis I (bacteria)
E21+E22	E3	85.2941	90.6832	544	161	464	146	129.847	115.793	0.165263	0.186297	0.283908	1	0.59589	0.0877705	0.587831	1	POLYAMINSYN3-PWY: superpathway of polyamine biosynthesis II
E21+E22	E3	100	100	544	161	544	161	890.143	819.27	0.119697	0.000681353	0.00336708	0.693618		1	1	1	POLYAMSYN-PWY: superpathway of polyamine biosynthesis I
E21+E22	E3	60.8456	72.0497	544	161	331	116	43.1419	57.7909	-0.421754	2.52331e-05	0.000240068	0.0256873	0.602841	0.00925463	0.101303	1	POLYISOPRENSYN-PWY: polyisoprenoid biosynthesis (E. coli)
E21+E22	E3	100	100	544	161	544	161	309.91	344.871	-0.154208	0.0798037	0.160554	1		1	1	1	PPGPPMET-PWY: ppGpp biosynthesis
E21+E22	E3	100	100	544	161	544	161	2112.99	2075.45	0.0258614	0.346608	0.415114	1		1	1	1	PRPP-PWY: superpathway of histidine, purine, and pyrimidine biosynthesis
E21+E22	E3	100	100	544	161	544	161	6386.98	6015.93	0.0863455	0.00131798	0.00596313	1		1	1	1	PWY-1042: glycolysis IV (plant cytosol)
E21+E22	E3	100	100	544	161	544	161	722.413	934.223	-0.370943	2.7287e-07	6.03874e-06	0.000277782		1	1	1	PWY-1269: CMP-3-deoxy-D-manno-octulosonate biosynthesis I
E21+E22	E3	84.7426	86.3354	544	161	461	139	93.2965	92.3934	0.014032	0.448826	0.479426	1	0.879085	0.705773	1	1	PWY-1861: formaldehyde assimilation II (RuMP Cycle)
E21+E22	E3	99.8162	100	544	161	543	161	348.202	388.849	-0.159284	0.237242	0.330387	1	0	1	1	1	PWY-241: C4 photosynthetic carbon assimilation cycle, NADP-ME type
E21+E22	E3	21.6912	39.7516	544	161	118	64	24.7265	24.9888	-0.0152208	3.13613e-06	4.43414e-05	0.00319258	0.419821	8.89411e-06	0.00110716	0.0090542	PWY-2723: trehalose degradation V
E21+E22	E3	100	100	544	161	544	161	872.348	995.533	-0.190565	0.00248786	0.00989313	1		1	1	1	PWY-2941: L-lysine biosynthesis II
E21+E22	E3	100	100	544	161	544	161	6574.23	6085.08	0.111547	3.85017e-05	0.000332159	0.0391947		1	1	1	PWY-2942: L-lysine biosynthesis III
E21+E22	E3	100	100	544	161	544	161	3844.26	3680.24	0.0629072	0.00169859	0.00734446	1		1	1	1	PWY-3001: superpathway of L-isoleucine biosynthesis I
E21+E22	E3	26.4706	38.5093	544	161	144	62	10.6072	10.9927	-0.0515064	0.00156994	0.00688878	1	0.574839	0.00414239	0.0496112	1	PWY-3781: aerobic respiration I (cytochrome c)
E21+E22	E3	100	100	544	161	544	161	2687.39	2799.33	-0.0588765	0.0740828	0.151743	1		1	1	1	PWY-3841: folate transformations II
E21+E22	E3	30.8824	47.8261	544	161	168	77	17.2654	17.6738	-0.0337301	1.77233e-05	0.000190043	0.0180423	0.487427	0.000105346	0.00428971	0.107243	PWY-4041: &gamma;-glutamyl cycle
E21+E22	E3	100	100	544	161	544	161	1461.58	1558.04	-0.0922118	0.147873	0.248818	1		1	1	1	PWY-4242: pantothenate and coenzyme A biosynthesis III
E21+E22	E3	70.2206	87.5776	544	161	382	141	56.9513	215.939	-1.92282	7.25182e-16	7.38235e-13	7.38235e-13	0.334472	5.20226e-06	0.00110716	0.0052959	PWY-4702: phytate degradation I
E21+E22	E3	100	100	544	161	544	161	921.659	1091.17	-0.243573	0.000102226	0.00069843	0.104066		1	1	1	PWY-4981: L-proline biosynthesis II (from arginine)
E21+E22	E3	100	100	544	161	544	161	342.847	369.494	-0.107987	0.0202248	0.0540391	1		1	1	1	PWY-4984: urea cycle
E21+E22	E3	20.7721	40.3727	544	161	113	65	26.0471	24.5681	0.0843392	3.39308e-07	7.04929e-06	0.000345415	0.387221	1.53028e-06	0.00110716	0.00155782	PWY-5004: superpathway of L-citrulline metabolism
E21+E22	E3	83.0882	75.7764	544	161	452	122	261.495	232.083	0.172143	0.00337049	0.0129478	1	1.57056	0.0385604	0.315331	1	PWY-5005: biotin biosynthesis II
E21+E22	E3	80.3309	90.6832	544	161	437	146	42.8843	57.9446	-0.434224	0.000106898	0.000725484	0.108823	0.419601	0.00192681	0.0280213	1	PWY-5022: 4-aminobutanoate degradation V
E21+E22	E3	99.8162	100	544	161	543	161	487.217	518.908	-0.0909126	0.0883659	0.17233	1	0	1	1	1	PWY-5030: L-histidine degradation III
E21+E22	E3	50.3676	59.6273	544	161	274	96	25.4966	33.9406	-0.412709	0.00653064	0.0227678	1	0.687114	0.0393787	0.31565	1	PWY-5083: NAD/NADH phosphorylation and dephosphorylation
E21+E22	E3	100	100	544	161	544	161	7219.03	6579.79	0.133763	1.67734e-06	2.72828e-05	0.00170753		1	1	1	PWY-5097: L-lysine biosynthesis VI
E21+E22	E3	100	100	544	161	544	161	2099.25	2038.42	0.0424252	0.0247079	0.0643291	1		1	1	1	PWY-5100: pyruvate fermentation to acetate and lactate II
E21+E22	E3	100	100	544	161	544	161	448.346	432.251	0.052744	0.228621	0.322661	1		1	1	1	PWY-5101: L-isoleucine biosynthesis II
E21+E22	E3	100	100	544	161	544	161	4594.05	4285.13	0.100427	0.000593296	0.00312941	0.603976		1	1	1	PWY-5103: L-isoleucine biosynthesis III
E21+E22	E3	100	100	544	161	544	161	1292.47	1266.41	0.0293858	0.494288	0.495749	1		1	1	1	PWY-5104: L-isoleucine biosynthesis IV
E21+E22	E3	94.6691	98.1366	544	161	515	158	336.19	352.514	-0.0684052	0.0656075	0.139143	1	0.337189	0.0823599	0.560004	1	PWY-5121: superpathway of geranylgeranyl diphosphate biosynthesis II (via MEP)
E21+E22	E3	96.875	96.2733	544	161	527	155	135.946	162.703	-0.259207	0.00122715	0.00563571	1	1.2	0.800306	1	1	PWY-5136: fatty acid &beta;-oxidation II (peroxisome)
E21+E22	E3	43.1985	58.3851	544	161	235	94	32.4736	40.7298	-0.326816	8.1476e-05	0.000588245	0.0829426	0.542071	0.000849785	0.0167346	0.865081	PWY-5138: unsaturated, even numbered fatty acid &beta;-oxidation
E21+E22	E3	100	100	544	161	544	161	594.69	536.248	0.149238	0.00777793	0.0263931	1		1	1	1	PWY-5154: L-arginine biosynthesis III (via N-acetyl-L-citrulline)
E21+E22	E3	46.875	59.0062	544	161	255	95	17.9207	21.8588	-0.286585	0.00122181	0.00563571	1	0.613003	0.00716921	0.0810917	1	PWY-5173: superpathway of acetyl-CoA biosynthesis
E21+E22	E3	100	100	544	161	544	161	910.04	786.203	0.211028	6.24197e-06	7.74918e-05	0.00635433		1	1	1	PWY-5177: glutaryl-CoA degradation
E21+E22	E3	100	100	544	161	544	161	2387.64	2172.7	0.1361	0.00657787	0.0227764	1		1	1	1	PWY-5188: tetrapyrrole biosynthesis I (from glutamate)
E21+E22	E3	99.4485	98.7578	544	161	541	159	306.453	293.708	0.0612828	0.0379029	0.0905755	1	2.26834	0.321507	1	1	PWY-5189: tetrapyrrole biosynthesis II (from glycine)
E21+E22	E3	32.3529	47.8261	544	161	176	77	46.0747	70.8137	-0.620054	1.68843e-06	2.72828e-05	0.00171882	0.521739	0.000510985	0.0130046	0.520183	PWY-5198: factor 420 biosynthesis
E21+E22	E3	99.6324	100	544	161	542	161	259.362	211.22	0.296221	0.0157773	0.0447389	1	0	1	1	1	PWY-5304: superpathway of sulfur oxidation (Acidianus ambivalens)
E21+E22	E3	98.5294	100	544	161	536	161	514.097	702.44	-0.450333	7.14388e-07	1.32227e-05	0.000727247	0	0.209071	0.972714	1	PWY-5345: superpathway of L-methionine biosynthesis (by sulfhydrylation)
E21+E22	E3	100	100	544	161	544	161	2599.38	2434.75	0.0943946	0.0106306	0.0329938	1		1	1	1	PWY-5347: superpathway of L-methionine biosynthesis (transsulfuration)
E21+E22	E3	98.5294	99.3789	544	161	536	160	554.013	331.273	0.741899	1.79842e-05	0.000190043	0.0183079	0.41875	0.692268	1	1	PWY-5367: petroselinate biosynthesis
E21+E22	E3	97.0588	98.1366	544	161	528	158	89.3421	80.155	0.156548	0.37781	0.440527	1	0.626582	0.587309	1	1	PWY-5384: sucrose degradation IV (sucrose phosphorylase)
E21+E22	E3	75.7353	81.3665	544	161	412	131	74.7939	84.9897	-0.184368	0.0260417	0.067182	1	0.714781	0.165336	0.890537	1	PWY-5464: superpathway of cytosolic glycolysis (plants), pyruvate dehydrogenase and TCA cycle
E21+E22	E3	100	100	544	161	544	161	1250.84	1130.22	0.146295	0.00945333	0.0302387	1		1	1	1	PWY-5484: glycolysis II (from fructose 6-phosphate)
E21+E22	E3	99.8162	100	544	161	543	161	198.031	305.534	-0.625601	2.44559e-06	3.6612e-05	0.00248961	0	1	1	1	PWY-5505: L-glutamate and L-glutamine biosynthesis
E21+E22	E3	36.7647	52.795	544	161	200	85	49.342	62.2566	-0.335411	2.86686e-05	0.000262925	0.0291847	0.519836	0.000349438	0.00988134	0.355728	PWY-561: superpathway of glyoxylate cycle and fatty acid degradation
E21+E22	E3	30.8824	47.8261	544	161	168	77	18.8745	19.6552	-0.0584718	3.50162e-05	0.000309969	0.0356465	0.487427	0.000105346	0.00428971	0.107243	PWY-5656: mannosylglycerate biosynthesis I
E21+E22	E3	100	100	544	161	544	161	1999.5	1958.24	0.030081	0.247429	0.341184	1		1	1	1	PWY-5659: GDP-mannose biosynthesis
E21+E22	E3	100	100	544	161	544	161	6674.91	6074.84	0.135902	1.30535e-07	3.26401e-06	0.000132885		1	1	1	PWY-5667: CDP-diacylglycerol biosynthesis I
E21+E22	E3	34.1912	47.205	544	161	186	76	17.5856	20.4374	-0.216814	0.00135563	0.00610632	1	0.581079	0.00299855	0.0391349	1	PWY-5675: nitrate reduction V (assimilatory)
E21+E22	E3	100	100	544	161	544	161	958.917	907.994	0.0787236	0.085164	0.168017	1		1	1	1	PWY-5676: acetyl-CoA fermentation to butanoate II
E21+E22	E3	100	100	544	161	544	161	9225.07	8593.84	0.102258	2.57198e-06	3.79461e-05	0.00261828		1	1	1	PWY-5686: UMP biosynthesis
E21+E22	E3	100	100	544	161	544	161	878.311	874.386	0.00646197	0.151153	0.250749	1		1	1	1	PWY-5690: TCA cycle II (plants and fungi)
E21+E22	E3	22.7941	36.646	544	161	124	59	7.43032	9.65696	-0.378146	0.000146054	0.000929269	0.148683	0.510412	0.000689428	0.0152573	0.701837	PWY-5692: allantoin degradation to glyoxylate II
E21+E22	E3	100	100	544	161	544	161	5253.59	4803.25	0.129292	0.000115427	0.000778179	0.117505		1	1	1	PWY-5695: urate biosynthesis/inosine 5'-phosphate degradation
E21+E22	E3	32.1691	45.3416	544	161	175	73	12.6963	14.1544	-0.156841	0.00068554	0.0033714	0.69788	0.571704	0.00260587	0.034905	1	PWY-5705: allantoin degradation to glyoxylate III
E21+E22	E3	34.9265	52.795	544	161	190	85	52.954	56.4551	-0.0923661	2.77124e-05	0.000258819	0.0282112	0.479894	7.02868e-05	0.00325236	0.071552	PWY-5723: Rubisco shunt
E21+E22	E3	31.6176	47.205	544	161	172	76	12.6811	14.363	-0.179674	0.000136505	0.000896528	0.138962	0.517119	0.000349122	0.00988134	0.355406	PWY-5747: 2-methylcitrate cycle II
E21+E22	E3	53.8603	60.2484	544	161	293	97	12.9227	14.4077	-0.156927	0.0929659	0.178565	1	0.770198	0.17583	0.895525	1	PWY-5754: 4-hydroxybenzoate biosynthesis I (eukaryotes)
E21+E22	E3	57.9044	65.2174	544	161	315	105	52.7553	66.7783	-0.340063	0.0157599	0.0447389	1	0.733624	0.100686	0.624987	1	PWY-5791: 1,4-dihydroxy-2-naphthoate biosynthesis II (plants)
E21+E22	E3	57.9044	65.2174	544	161	315	105	52.7553	66.7783	-0.340063	0.0157599	0.0447389	1	0.733624	0.100686	0.624987	1	PWY-5837: 1,4-dihydroxy-2-naphthoate biosynthesis I
E21+E22	E3	31.6176	46.5839	544	161	172	75	90.9942	103.787	-0.189776	0.000142466	0.000923762	0.145031	0.530179	0.000679426	0.0152573	0.691655	PWY-5838: superpathway of menaquinol-8 biosynthesis I
E21+E22	E3	56.4338	65.2174	544	161	307	105	142.341	177.267	-0.316572	0.0125362	0.0373154	1	0.690858	0.0557386	0.423447	1	PWY-5840: superpathway of menaquinol-7 biosynthesis
E21+E22	E3	22.0588	39.1304	544	161	120	63	144.509	125.583	0.202526	1.82949e-05	0.000190043	0.0186242	0.440252	2.50375e-05	0.00159301	0.0254882	PWY-5845: superpathway of menaquinol-9 biosynthesis
E21+E22	E3	22.0588	39.1304	544	161	120	63	144.509	125.583	0.202526	1.82949e-05	0.000190043	0.0186242	0.440252	2.50375e-05	0.00159301	0.0254882	PWY-5850: superpathway of menaquinol-6 biosynthesis I
E21+E22	E3	30.3309	44.7205	544	161	165	72	16.9084	23.0872	-0.449359	7.24109e-05	0.000542111	0.0737143	0.538149	0.000871253	0.0167346	0.886935	PWY-5855: ubiquinol-7 biosynthesis (prokaryotic)
E21+E22	E3	30.3309	44.7205	544	161	165	72	16.9084	23.0872	-0.449359	7.24109e-05	0.000542111	0.0737143	0.538149	0.000871253	0.0167346	0.886935	PWY-5856: ubiquinol-9 biosynthesis (prokaryotic)
E21+E22	E3	30.3309	44.7205	544	161	165	72	16.9084	23.0872	-0.449359	7.24109e-05	0.000542111	0.0737143	0.538149	0.000871253	0.0167346	0.886935	PWY-5857: ubiquinol-10 biosynthesis (prokaryotic)
E21+E22	E3	22.0588	39.1304	544	161	120	63	99.7746	86.0086	0.214191	1.80689e-05	0.000190043	0.0183941	0.440252	2.50375e-05	0.00159301	0.0254882	PWY-5860: superpathway of demethylmenaquinol-6 biosynthesis I
E21+E22	E3	31.6176	46.5839	544	161	172	75	61.2729	70.6252	-0.204932	0.000140764	0.000918575	0.143298	0.530179	0.000679426	0.0152573	0.691655	PWY-5861: superpathway of demethylmenaquinol-8 biosynthesis
E21+E22	E3	22.0588	39.1304	544	161	120	63	99.7746	86.0086	0.214191	1.80689e-05	0.000190043	0.0183941	0.440252	2.50375e-05	0.00159301	0.0254882	PWY-5862: superpathway of demethylmenaquinol-9 biosynthesis
E21+E22	E3	57.9044	65.2174	544	161	315	105	56.9971	66.6197	-0.225059	0.019953	0.0534529	1	0.733624	0.100686	0.624987	1	PWY-5863: superpathway of phylloquinol biosynthesis
E21+E22	E3	42.0956	32.9193	544	161	229	53	50.9454	58.2292	-0.192792	0.0277313	0.070753	1	1.4814	0.04375	0.339981	1	PWY-5871: ubiquinol-9 biosynthesis (eukaryotic)
E21+E22	E3	42.0956	32.9193	544	161	229	53	50.9454	58.2292	-0.192792	0.0277313	0.070753	1	1.4814	0.04375	0.339981	1	PWY-5873: ubiquinol-7 biosynthesis (eukaryotic)
E21+E22	E3	22.0588	39.1304	544	161	120	63	144.509	125.583	0.202526	1.82949e-05	0.000190043	0.0186242	0.440252	2.50375e-05	0.00159301	0.0254882	PWY-5896: superpathway of menaquinol-10 biosynthesis
E21+E22	E3	57.9044	65.2174	544	161	315	105	152.118	187.841	-0.304321	0.0168156	0.0467713	1	0.733624	0.100686	0.624987	1	PWY-5897: superpathway of menaquinol-11 biosynthesis
E21+E22	E3	57.9044	65.2174	544	161	315	105	152.118	187.841	-0.304321	0.0168156	0.0467713	1	0.733624	0.100686	0.624987	1	PWY-5898: superpathway of menaquinol-12 biosynthesis
E21+E22	E3	57.9044	65.2174	544	161	315	105	152.118	187.841	-0.304321	0.0168156	0.0467713	1	0.733624	0.100686	0.624987	1	PWY-5899: superpathway of menaquinol-13 biosynthesis
E21+E22	E3	99.8162	100	544	161	543	161	455.518	490.776	-0.107558	0.0449598	0.103354	1	0	1	1	1	PWY-5913: TCA cycle VI (obligate autotrophs)
E21+E22	E3	95.2206	92.5466	544	161	518	149	150.452	152.582	-0.0202832	0.217301	0.314669	1	1.60454	0.23116	0.992914	1	PWY-5918: superpathay of heme biosynthesis from glutamate
E21+E22	E3	41.3603	52.795	544	161	225	85	33.4321	44.161	-0.40154	0.00165658	0.00720684	1	0.630647	0.0113893	0.120774	1	PWY-5920: superpathway of heme biosynthesis from glycine
E21+E22	E3	100	100	544	161	544	161	901.329	788.022	0.193818	0.00253247	0.0100313	1		1	1	1	PWY-5941: glycogen degradation II (eukaryotic)
E21+E22	E3	97.7941	98.1366	544	161	532	158	293.307	297.531	-0.0206303	0.211534	0.308473	1	0.841772	1	1	1	PWY-5971: palmitate biosynthesis II (bacteria and plants)
E21+E22	E3	100	100	544	161	544	161	3519.75	3077.13	0.193887	2.61175e-09	1.7725e-07	2.65876e-06		1	1	1	PWY-5973: cis-vaccenate biosynthesis
E21+E22	E3	99.8162	100	544	161	543	161	718.924	523.914	0.45651	0.000145275	0.000929269	0.14789	0	1	1	1	PWY-5989: stearate biosynthesis II (bacteria and plants)
E21+E22	E3	97.7941	98.1366	544	161	532	158	290.718	279.012	0.0592922	0.413947	0.460042	1	0.841772	1	1	1	PWY-6113: superpathway of mycolate biosynthesis
E21+E22	E3	100	100	544	161	544	161	7228.25	7068.88	0.0321643	0.00916657	0.030005	1		1	1	1	PWY-6121: 5-aminoimidazole ribonucleotide biosynthesis I
E21+E22	E3	100	100	544	161	544	161	7260.2	7008.69	0.0508655	0.00215879	0.0088504	1		1	1	1	PWY-6122: 5-aminoimidazole ribonucleotide biosynthesis II
E21+E22	E3	100	100	544	161	544	161	2470.77	2117.24	0.222776	1.02237e-08	4.5052e-07	1.04077e-05		1	1	1	PWY-6123: inosine-5'-phosphate biosynthesis I
E21+E22	E3	100	100	544	161	544	161	2240.27	1878.44	0.254138	1.17145e-09	9.17336e-08	1.19254e-06		1	1	1	PWY-6124: inosine-5'-phosphate biosynthesis II
E21+E22	E3	100	100	544	161	544	161	2864.45	2824.91	0.020055	0.265298	0.356503	1		1	1	1	PWY-6125: superpathway of guanosine nucleotides de novo biosynthesis II
E21+E22	E3	100	100	544	161	544	161	5622.02	5300.47	0.0849697	0.000652744	0.00332375	0.664493		1	1	1	PWY-6126: superpathway of adenosine nucleotides de novo biosynthesis II
E21+E22	E3	99.8162	100	544	161	543	161	302.196	330.22	-0.127942	0.293429	0.37621	1	0	1	1	1	PWY-6147: 6-hydroxymethyl-dihydropterin diphosphate biosynthesis I
E21+E22	E3	100	100	544	161	544	161	7363.44	6277.39	0.230215	1.41575e-10	1.60137e-08	1.44123e-07		1	1	1	PWY-6151: S-adenosyl-L-methionine cycle I
E21+E22	E3	100	100	544	161	544	161	7494.47	6516.33	0.201768	9.47145e-09	4.3827e-07	9.64194e-06		1	1	1	PWY-6163: chorismate biosynthesis from 3-dehydroquinate
E21+E22	E3	29.0441	48.4472	544	161	158	78	146.038	186.239	-0.350815	1.24339e-07	3.26401e-06	0.000126577	0.435565	7.1862e-06	0.00110716	0.00731555	PWY-6167: flavin biosynthesis II (archaea)
E21+E22	E3	100	100	544	161	544	161	2563.39	2352.65	0.123767	0.00837157	0.0280337	1		1	1	1	PWY-6168: flavin biosynthesis III (fungi)
E21+E22	E3	100	100	544	161	544	161	2761.22	2047.99	0.431099	1.19314e-10	1.51827e-08	1.21462e-07		1	1	1	PWY-621: sucrose degradation III (sucrose invertase)
E21+E22	E3	30.1471	44.7205	544	161	164	72	27.1443	26.1168	0.055668	0.000223304	0.00132938	0.227323	0.53348	0.000838803	0.0167346	0.853902	PWY-6263: superpathway of menaquinol-8 biosynthesis II
E21+E22	E3	94.3015	98.1366	544	161	513	158	748.155	847.929	-0.180606	0.00874234	0.0288016	1	0.31421	0.0571772	0.427988	1	PWY-6270: isoprene biosynthesis I
E21+E22	E3	100	100	544	161	544	161	7260.2	7008.69	0.0508655	0.00215879	0.0088504	1		1	1	1	PWY-6277: superpathway of 5-aminoimidazole ribonucleotide biosynthesis
E21+E22	E3	99.0809	98.7578	544	161	539	159	241.433	235.823	0.0339228	0.392123	0.448518	1	1.35597	0.661815	1	1	PWY-6282: palmitoleate biosynthesis I (from (5Z)-dodec-5-enoate)
E21+E22	E3	97.7941	98.1366	544	161	532	158	255.832	245.301	0.0606442	0.288745	0.372258	1	0.841772	1	1	1	PWY-6284: superpathway of unsaturated fatty acids biosynthesis (E. coli)
E21+E22	E3	34.1912	47.205	544	161	186	76	166.833	188.16	-0.173554	0.000950115	0.00445722	0.967217	0.581079	0.00299855	0.0391349	1	PWY-6285: superpathway of fatty acids biosynthesis (E. coli)
E21+E22	E3	100	100	544	161	544	161	1852.66	1550.66	0.256713	2.66568e-08	9.69165e-07	2.71366e-05		1	1	1	PWY-6305: putrescine biosynthesis IV
E21+E22	E3	38.2353	45.9627	544	161	208	74	6.23621	5.41859	0.202752	0.0924756	0.177959	1	0.727799	0.0824933	0.560004	1	PWY-6309: L-tryptophan degradation XI (mammalian, via kynurenine)
E21+E22	E3	100	100	544	161	544	161	4237.66	3513.19	0.270487	4.66351e-09	2.49866e-07	4.74745e-06		1	1	1	PWY-6317: galactose degradation I (Leloir pathway)
E21+E22	E3	27.2059	41.6149	544	161	148	67	20.0389	19.058	0.0724101	0.000655281	0.00332375	0.667076	0.524348	0.000636421	0.0152573	0.647877	PWY-6318: L-phenylalanine degradation IV (mammalian, via side chain)
E21+E22	E3	100	100	544	161	544	161	868.218	816.499	0.0886061	0.0304489	0.075973	1		1	1	1	PWY-6353: purine nucleotides degradation II (aerobic)
E21+E22	E3	100	100	544	161	544	161	4681.74	5042.64	-0.107135	0.0178157	0.0488213	1		1	1	1	PWY-6385: peptidoglycan biosynthesis III (mycobacteria)
E21+E22	E3	100	100	544	161	544	161	9195.49	8593.83	0.0976258	0.000672034	0.00336708	0.68413		1	1	1	PWY-6386: UDP-N-acetylmuramoyl-pentapeptide biosynthesis II (lysine-containing)
E21+E22	E3	100	100	544	161	544	161	8893.02	8302.1	0.0991979	0.000291458	0.0016763	0.296705		1	1	1	PWY-6387: UDP-N-acetylmuramoyl-pentapeptide biosynthesis I (meso-diaminopimelate containing)
E21+E22	E3	90.9926	91.3043	544	161	495	147	44.2341	44.5626	-0.0106731	0.286725	0.370932	1	0.962099	1	1	1	PWY-6435: 4-hydroxybenzoate biosynthesis V
E21+E22	E3	62.5	65.8385	544	161	340	106	130.811	155.891	-0.253053	0.221658	0.318123	1	0.86478	0.457986	1	1	PWY-6471: peptidoglycan biosynthesis IV (Enterococcus faecium)
E21+E22	E3	100	100	544	161	544	161	1262.23	904.741	0.480403	9.49827e-13	1.93385e-10	9.66924e-10		1	1	1	PWY-6507: 4-deoxy-L-threo-hex-4-enopyranuronate degradation
E21+E22	E3	99.0809	98.7578	544	161	539	159	215.406	224.371	-0.0588312	0.131534	0.227271	1	1.35597	0.661815	1	1	PWY-6519: 8-amino-7-oxononanoate biosynthesis I
E21+E22	E3	100	100	544	161	544	161	3961.8	3322.89	0.253718	1.24169e-06	2.14243e-05	0.00126404		1	1	1	PWY-6527: stachyose degradation
E21+E22	E3	92.6471	89.441	544	161	504	144	120.566	100.426	0.26369	0.0111572	0.0343142	1	1.4875	0.190689	0.920006	1	PWY-6531: mannitol cycle
E21+E22	E3	100	100	544	161	544	161	1984.13	1874.86	0.0817268	0.0920198	0.177754	1		1	1	1	PWY-6545: pyrimidine deoxyribonucleotides de novo biosynthesis III
E21+E22	E3	100	100	544	161	544	161	339.212	454.401	-0.421778	3.51548e-06	4.70889e-05	0.00357876		1	1	1	PWY-6549: L-glutamine biosynthesis III
E21+E22	E3	100	99.3789	544	161	544	160	214.575	205.944	0.0592299	0.271689	0.361703	1	inf	0.228369	0.992914	1	PWY-6588: pyruvate fermentation to acetone
E21+E22	E3	99.4485	100	544	161	541	161	388.126	361.935	0.100795	0.0296387	0.0748518	1	0	1	1	1	PWY-6590: superpathway of Clostridium acetobutylicum acidogenic fermentation
E21+E22	E3	100	100	544	161	544	161	334.739	300.75	0.15447	0.0461404	0.105316	1		1	1	1	PWY-6595: superpathway of guanosine nucleotides degradation (plants)
E21+E22	E3	100	100	544	161	544	161	444.582	433.629	0.0359879	0.0719447	0.148861	1		1	1	1	PWY-6606: guanosine nucleotides degradation II
E21+E22	E3	100	100	544	161	544	161	1876.41	1563.39	0.26329	1.20885e-08	4.92244e-07	1.23061e-05		1	1	1	PWY-6608: guanosine nucleotides degradation III
E21+E22	E3	100	100	544	161	544	161	2413.67	2257.76	0.0963325	0.000608139	0.00318814	0.619086		1	1	1	PWY-6609: adenine and adenosine salvage III
E21+E22	E3	99.0809	98.1366	544	161	539	158	402.803	398.67	0.0148782	0.32882	0.405744	1	2.04684	0.392015	1	1	PWY-6612: superpathway of tetrahydrofolate biosynthesis
E21+E22	E3	53.8603	66.4596	544	161	293	107	146.942	186.116	-0.340959	0.000656224	0.00332375	0.668036	0.58912	0.00496208	0.058062	1	PWY-6628: superpathway of L-phenylalanine biosynthesis
E21+E22	E3	38.2353	52.795	544	161	208	85	117.202	130.689	-0.157139	0.000549508	0.00291353	0.559399	0.553501	0.00139427	0.0236561	1	PWY-6629: superpathway of L-tryptophan biosynthesis
E21+E22	E3	95.5882	96.8944	544	161	520	156	210.816	268.187	-0.347254	0.0300521	0.0753522	1	0.694444	0.651296	1	1	PWY-6630: superpathway of L-tyrosine biosynthesis
E21+E22	E3	100	100	544	161	544	161	5456.48	4837.58	0.173687	4.60321e-09	2.49866e-07	4.68606e-06		1	1	1	PWY-6700: queuosine biosynthesis
E21+E22	E3	100	100	544	161	544	161	3840.97	3593.45	0.096104	0.000935676	0.00440981	0.952518		1	1	1	PWY-6703: preQ0 biosynthesis
E21+E22	E3	30.3309	44.7205	544	161	165	72	16.9084	23.0872	-0.449359	7.24109e-05	0.000542111	0.0737143	0.538149	0.000871253	0.0167346	0.886935	PWY-6708: ubiquinol-8 biosynthesis (prokaryotic)
E21+E22	E3	100	100	544	161	544	161	10469.8	9727.44	0.106102	2.15999e-05	0.00021143	0.0219887		1	1	1	PWY-6737: starch degradation V
E21+E22	E3	33.0882	52.795	544	161	180	85	31.0894	29.3877	0.0812093	3.45067e-06	4.68371e-05	0.00351278	0.442146	8.05393e-06	0.00110716	0.0081989	PWY-6803: phosphatidylcholine acyl editing
E21+E22	E3	20.5882	36.646	544	161	112	59	10.4493	11.042	-0.0795981	3.11431e-05	0.000283068	0.0317037	0.448211	6.10238e-05	0.0029582	0.0621222	PWY-6823: molybdenum cofactor biosynthesis
E21+E22	E3	29.7794	48.4472	544	161	162	78	12.8308	12.3887	0.050589	6.456e-06	7.91832e-05	0.00657221	0.451269	1.83243e-05	0.00159301	0.0186541	PWY-6837: fatty acid beta-oxidation V (unsaturated, odd number, di-isomerase-dependent)
E21+E22	E3	57.1691	70.1863	544	161	311	113	53.9105	107.88	-1.00079	1.38306e-07	3.35228e-06	0.000140796	0.566979	0.00331095	0.0421318	1	PWY-6859: all-trans-farnesol biosynthesis
E21+E22	E3	27.7574	40.9938	544	161	151	66	15.7876	18.24	-0.208308	0.000656261	0.00332375	0.668074	0.55305	0.00182738	0.0277652	1	PWY-6891: thiazole biosynthesis II (Bacillus)
E21+E22	E3	100	100	544	161	544	161	105.25	89.7439	0.229933	3.54323e-05	0.000310949	0.0360701		1	1	1	PWY-6892: thiazole biosynthesis I (E. coli)
E21+E22	E3	27.7574	40.9938	544	161	151	66	78.1761	88.8218	-0.184185	0.000678774	0.00336708	0.690992	0.55305	0.00182738	0.0277652	1	PWY-6895: superpathway of thiamin diphosphate biosynthesis II
E21+E22	E3	100	100	544	161	544	161	2997.76	2642.62	0.181917	7.11106e-08	2.07555e-06	7.23905e-05		1	1	1	PWY-6897: thiamin salvage II
E21+E22	E3	100	100	544	161	544	161	528.192	585.498	-0.1486	0.0262778	0.0675526	1		1	1	1	PWY-6901: superpathway of glucose and xylose degradation
E21+E22	E3	100	100	544	161	544	161	2103.58	2017.94	0.0599675	0.44299	0.47721	1		1	1	1	PWY-6936: seleno-amino acid biosynthesis
E21+E22	E3	100	100	544	161	544	161	1141.78	1097.17	0.0575006	0.0279868	0.0710488	1		1	1	1	PWY-6969: TCA cycle V (2-oxoglutarate:ferredoxin oxidoreductase)
E21+E22	E3	100	99.3789	544	161	544	160	262.782	269.141	-0.0344966	0.249802	0.34272	1	inf	0.228369	0.992914	1	PWY-7003: glycerol degradation to butanol
E21+E22	E3	28.6765	45.9627	544	161	156	74	7.86511	8.5235	-0.115979	2.08301e-05	0.000205874	0.021205	0.472694	5.59897e-05	0.00284987	0.0569975	PWY-7094: fatty acid salvage
E21+E22	E3	100	100	544	161	544	161	8155.78	7298.96	0.160132	2.05623e-07	4.65166e-06	0.000209325		1	1	1	PWY-7111: pyruvate fermentation to isobutanol (engineered)
E21+E22	E3	99.8162	100	544	161	543	161	99.8857	98.8356	0.0152477	0.397211	0.448791	1	0	1	1	1	PWY-7115: C4 photosynthetic carbon assimilation cycle, NAD-ME type
E21+E22	E3	99.8162	100	544	161	543	161	656.226	677.314	-0.0456317	0.110723	0.201639	1	0	1	1	1	PWY-7117: C4 photosynthetic carbon assimilation cycle, PEPCK type
E21+E22	E3	100	100	544	161	544	161	2166.15	2189.36	-0.0153749	0.251484	0.344564	1		1	1	1	PWY-7184: pyrimidine deoxyribonucleotides de novo biosynthesis I
E21+E22	E3	100	100	544	161	544	161	2808.09	2762.79	0.0234617	0.280823	0.368399	1		1	1	1	PWY-7187: pyrimidine deoxyribonucleotides de novo biosynthesis II
E21+E22	E3	100	100	544	161	544	161	1682.63	1522.47	0.144306	8.55068e-05	0.000612999	0.0870459		1	1	1	PWY-7196: superpathway of pyrimidine ribonucleosides salvage
E21+E22	E3	100	100	544	161	544	161	1560.21	1587.68	-0.0251866	0.195343	0.294606	1		1	1	1	PWY-7197: pyrimidine deoxyribonucleotide phosphorylation
E21+E22	E3	99.6324	100	544	161	542	161	335.062	296.82	0.174839	0.00836152	0.0280337	1	0	1	1	1	PWY-7198: pyrimidine deoxyribonucleotides de novo biosynthesis IV
E21+E22	E3	100	100	544	161	544	161	1596.76	1406.8	0.182731	5.7482e-05	0.000453618	0.0585167		1	1	1	PWY-7199: pyrimidine deoxyribonucleosides salvage
E21+E22	E3	33.2721	50.3106	544	161	181	81	34.4913	41.557	-0.268859	1.94978e-05	0.000198688	0.0198488	0.492467	0.000131044	0.00476439	0.133403	PWY-7204: pyridoxal 5'-phosphate salvage II (plants)
E21+E22	E3	100	100	544	161	544	161	2326.13	2359.58	-0.0205999	0.432401	0.472301	1		1	1	1	PWY-7208: superpathway of pyrimidine nucleobases salvage
E21+E22	E3	84.0074	86.9565	544	161	457	140	79.4965	86.2228	-0.117179	0.1517	0.251107	1	0.787931	0.386353	1	1	PWY-7209: superpathway of pyrimidine ribonucleosides degradation
E21+E22	E3	99.6324	100	544	161	542	161	440.462	391.365	0.170503	0.0110975	0.0342342	1	0	1	1	1	PWY-7210: pyrimidine deoxyribonucleotides biosynthesis from CTP
E21+E22	E3	100	100	544	161	544	161	1691.83	1691.96	-0.000112149	0.477078	0.493272	1		1	1	1	PWY-7211: superpathway of pyrimidine deoxyribonucleotides de novo biosynthesis
E21+E22	E3	100	100	544	161	544	161	11593.6	11124.6	0.0595739	0.00929796	0.0302387	1		1	1	1	PWY-7219: adenosine ribonucleotides de novo biosynthesis
E21+E22	E3	100	100	544	161	544	161	3414.42	3201.45	0.0929174	0.00033991	0.00187042	0.346029		1	1	1	PWY-7220: adenosine deoxyribonucleotides de novo biosynthesis II
E21+E22	E3	100	100	544	161	544	161	8537.16	7854.98	0.120149	9.30258e-05	0.000648632	0.0947002		1	1	1	PWY-7221: guanosine ribonucleotides de novo biosynthesis
E21+E22	E3	100	100	544	161	544	161	3414.42	3201.45	0.0929174	0.00033991	0.00187042	0.346029		1	1	1	PWY-7222: guanosine deoxyribonucleotides de novo biosynthesis II
E21+E22	E3	100	100	544	161	544	161	2882.54	2978.77	-0.047375	0.447691	0.479426	1		1	1	1	PWY-7228: superpathway of guanosine nucleotides de novo biosynthesis I
E21+E22	E3	100	100	544	161	544	161	6622.01	6359.24	0.0584153	0.00594067	0.0208538	1		1	1	1	PWY-7229: superpathway of adenosine nucleotides de novo biosynthesis I
E21+E22	E3	100	100	544	161	544	161	1398.32	1441.53	-0.043912	0.368305	0.433451	1		1	1	1	PWY-7234: inosine-5'-phosphate biosynthesis III
E21+E22	E3	51.2868	46.5839	544	161	279	75	61.1309	78.0405	-0.352321	0.249402	0.342634	1	1.20725	0.323882	1	1	PWY-7235: superpathway of ubiquinol-6 biosynthesis (eukaryotic)
E21+E22	E3	100	100	544	161	544	161	416.479	354.31	0.233234	5.30924e-05	0.000428412	0.054048		1	1	1	PWY-7237: myo-, chiro- and scillo-inositol degradation
E21+E22	E3	100	100	544	161	544	161	1434.98	1038.84	0.466064	4.59181e-12	7.79077e-10	4.67446e-09		1	1	1	PWY-7242: D-fructuronate degradation
E21+E22	E3	100	100	544	161	544	161	4982.36	4835.62	0.0431279	0.0156384	0.0447389	1		1	1	1	PWY-724: superpathway of L-lysine, L-threonine and L-methionine biosynthesis II
E21+E22	E3	32.3529	46.5839	544	161	176	75	40.2979	47.5444	-0.23857	0.00039725	0.00213969	0.404401	0.548406	0.00139036	0.0236561	1	PWY-7254: TCA cycle VII (acetate-producers)
E21+E22	E3	24.6324	40.3727	544	161	134	65	13.1917	13.3245	-0.0144515	3.64405e-05	0.000317063	0.0370964	0.482702	0.000145055	0.0049222	0.147666	PWY-7269: NAD/NADP-NADH/NADPH mitochondrial interconversion (yeast)
E21+E22	E3	99.8162	100	544	161	543	161	2278.96	2081.42	0.130805	0.0962346	0.182774	1	0	1	1	1	PWY-7282: 4-amino-2-methyl-5-phosphomethylpyrimidine biosynthesis (yeast)
E21+E22	E3	31.8015	47.205	544	161	173	76	50.8263	97.0265	-0.932804	1.36752e-06	2.28219e-05	0.00139214	0.521528	0.000488646	0.0128132	0.497441	PWY-7286: 7-(3-amino-3-carboxypropyl)-wyosine biosynthesis
E21+E22	E3	37.5	50.9317	544	161	204	82	9.5997	12.8994	-0.42624	0.000239405	0.00140875	0.243715	0.578049	0.00257453	0.034905	1	PWY-7315: dTDP-N-acetylthomosamine biosynthesis
E21+E22	E3	99.0809	99.3789	544	161	539	160	410.922	417.049	-0.0213529	0.17044	0.267347	1	0.67375	1	1	1	PWY-7323: superpathway of GDP-mannose-derived O-antigen building blocks biosynthesis
E21+E22	E3	95.5882	96.2733	544	161	520	155	127.412	137.052	-0.105218	0.33497	0.408873	1	0.83871	0.826557	1	1	PWY-7328: superpathway of UDP-glucose-derived O-antigen building blocks biosynthesis
E21+E22	E3	100	100	544	161	544	161	3304.02	2723.61	0.278702	4.02988e-09	2.49866e-07	4.10242e-06		1	1	1	PWY-7357: thiamin formation from pyrithiamine and oxythiamine (yeast)
E21+E22	E3	91.1765	98.7578	544	161	496	159	95.2215	116.002	-0.284786	0.000677926	0.00336708	0.690128	0.129979	0.000344032	0.00988134	0.350224	PWY-7371: 1,4-dihydroxy-6-naphthoate biosynthesis II
E21+E22	E3	100	100	544	161	544	161	1451.01	1786.33	-0.299946	4.49911e-10	4.5801e-08	4.5801e-07		1	1	1	PWY-7383: anaerobic energy metabolism (invertebrates, cytosol)
E21+E22	E3	99.0809	98.7578	544	161	539	159	151.907	161.41	-0.0875349	0.150328	0.250749	1	1.35597	0.661815	1	1	PWY-7388: octanoyl-[acyl-carrier protein] biosynthesis (mitochondria, yeast)
E21+E22	E3	56.9853	70.1863	544	161	310	113	142.608	203.078	-0.509985	2.03888e-06	3.1932e-05	0.00207558	0.562741	0.00254207	0.034905	1	PWY-7392: taxadiene biosynthesis (engineered)
E21+E22	E3	100	100	544	161	544	161	1965.18	1734.79	0.179904	0.00963367	0.0305516	1		1	1	1	PWY-7400: L-arginine biosynthesis IV (archaebacteria)
E21+E22	E3	99.6324	100	544	161	542	161	1053.05	883.968	0.252509	0.016218	0.045861	1	0	1	1	1	PWY-7456: mannan degradation
E21+E22	E3	99.8162	100	544	161	543	161	276.677	287.619	-0.0559586	0.225831	0.321533	1	0	1	1	1	PWY-7539: 6-hydroxymethyl-dihydropterin diphosphate biosynthesis III (Chlamydia)
E21+E22	E3	97.2426	99.3789	544	161	529	160	661.959	750.261	-0.180651	0.0175558	0.0484331	1	0.220417	0.137889	0.812008	1	PWY-7560: methylerythritol phosphate pathway II
E21+E22	E3	100	100	544	161	544	161	3108.34	2706.39	0.199775	2.51818e-08	9.49448e-07	2.56351e-05		1	1	1	PWY-7663: gondoate biosynthesis (anaerobic)
E21+E22	E3	99.0809	98.7578	544	161	539	159	222.251	231.665	-0.0598464	0.172852	0.269057	1	1.35597	0.661815	1	1	PWY-7664: oleate biosynthesis IV (anaerobic)
E21+E22	E3	90.0735	92.5466	544	161	490	149	111.22	191.418	-0.783311	3.67034e-08	1.28842e-06	3.73641e-05	0.730798	0.441028	1	1	PWY-821: superpathway of sulfur amino acid biosynthesis (Saccharomyces cerevisiae)
E21+E22	E3	100	100	544	161	544	161	3238.1	3038.82	0.0916356	0.00122916	0.00563571	1		1	1	1	PWY-841: superpathway of purine nucleotides de novo biosynthesis I
E21+E22	E3	100	100	544	161	544	161	109.89	110.482	-0.00775341	0.451875	0.480678	1		1	1	1	PWY0-1061: superpathway of L-alanine biosynthesis
E21+E22	E3	37.5	44.0994	544	161	204	71	12.1799	16.5438	-0.441784	0.0222232	0.0587615	1	0.760563	0.141522	0.812008	1	PWY0-1241: ADP-L-glycero-&beta;-D-manno-heptose biosynthesis
E21+E22	E3	97.9779	96.8944	544	161	533	156	558.592	586.057	-0.0692467	0.132522	0.22827	1	1.55303	0.380156	1	1	PWY0-1261: anhydromuropeptides recycling
E21+E22	E3	100	100	544	161	544	161	5683.73	5371	0.081647	0.0102887	0.0322275	1		1	1	1	PWY0-1296: purine ribonucleosides degradation
E21+E22	E3	100	100	544	161	544	161	467.151	479.052	-0.0362931	0.363334	0.428518	1		1	1	1	PWY0-1297: superpathway of purine deoxyribonucleosides degradation
E21+E22	E3	100	100	544	161	544	161	357.521	313.601	0.1891	0.00160017	0.00699131	1		1	1	1	PWY0-1298: superpathway of pyrimidine deoxyribonucleosides degradation
E21+E22	E3	100	100	544	161	544	161	6674.91	6074.84	0.135902	1.30842e-07	3.26401e-06	0.000133197		1	1	1	PWY0-1319: CDP-diacylglycerol biosynthesis II
E21+E22	E3	20.4044	39.1304	544	161	111	63	13.6443	8.88242	0.619277	1.73954e-06	2.76695e-05	0.00177085	0.398768	3.66144e-06	0.00110716	0.00372734	PWY0-1338: polymyxin resistance
E21+E22	E3	45.4044	56.5217	544	161	247	91	26.0385	35.6987	-0.455225	0.000811657	0.0039346	0.826267	0.639731	0.0152381	0.156691	1	PWY0-1415: superpathway of heme biosynthesis from uroporphyrinogen-III
E21+E22	E3	90.9926	90.0621	544	161	495	145	192.295	147.781	0.379868	1.00389e-05	0.000118833	0.0102196	1.11471	0.756558	1	1	PWY0-1479: tRNA processing
E21+E22	E3	25.7353	42.236	544	161	140	68	5.02481	4.80121	0.065671	1.95175e-05	0.000198688	0.0198688	0.473937	8.03009e-05	0.00355419	0.0817463	PWY0-1533: methylphosphonate degradation I
E21+E22	E3	100	100	544	161	544	161	2102.05	2326.65	-0.146453	0.00216478	0.0088504	1		1	1	1	PWY0-1586: peptidoglycan maturation (meso-diaminopimelate containing)
E21+E22	E3	100	100	544	161	544	161	2348.79	2338.71	0.0062002	0.102466	0.191483	1		1	1	1	PWY0-162: superpathway of pyrimidine ribonucleotides de novo biosynthesis
E21+E22	E3	100	100	544	161	544	161	2886.15	2890.43	-0.00213921	0.229689	0.323407	1		1	1	1	PWY0-166: superpathway of pyrimidine deoxyribonucleotides de novo biosynthesis (E. coli)
E21+E22	E3	22.6103	37.2671	544	161	123	60	9.23748	10.052	-0.121915	7.72686e-05	0.000562229	0.0786594	0.491805	0.000318072	0.00981204	0.323797	PWY0-41: allantoin degradation IV (anaerobic)
E21+E22	E3	28.3088	45.9627	544	161	154	74	14.7774	16.9146	-0.194874	1.33626e-05	0.000152844	0.0136031	0.464241	5.03532e-05	0.00269787	0.0512595	PWY0-42: 2-methylcitrate cycle I
E21+E22	E3	100	100	544	161	544	161	1154.11	1205.3	-0.0626043	0.061474	0.132586	1		1	1	1	PWY0-781: aspartate superpathway
E21+E22	E3	99.8162	100	544	161	543	161	1803.26	2073.27	-0.201302	0.00889805	0.0292201	1	0	1	1	1	PWY0-845: superpathway of pyridoxal 5'-phosphate biosynthesis and salvage
E21+E22	E3	99.0809	98.7578	544	161	539	159	192.718	201.753	-0.0660975	0.16377	0.26471	1	1.35597	0.661815	1	1	PWY0-862: (5Z)-dodec-5-enoate biosynthesis
E21+E22	E3	68.5662	68.323	544	161	373	110	31.7162	21.2755	0.576028	0.00847471	0.0282861	1	1.01132	1	1	1	PWY490-3: nitrate reduction VI (assimilatory)
E21+E22	E3	100	100	544	161	544	161	740.109	654.609	0.177105	0.00499751	0.0180407	1		1	1	1	PWY4FS-7: phosphatidylglycerol biosynthesis I (plastidic)
E21+E22	E3	100	100	544	161	544	161	740.109	654.609	0.177105	0.00499115	0.0180407	1		1	1	1	PWY4FS-8: phosphatidylglycerol biosynthesis II (non-plastidic)
E21+E22	E3	100	100	544	161	544	161	287.636	308.692	-0.101923	0.0313706	0.0775852	1		1	1	1	PWY4LZ-257: superpathway of fermentation (Chlamydomonas reinhardtii)
E21+E22	E3	38.6029	47.8261	544	161	210	77	9.72416	9.92168	-0.0290099	0.0118774	0.0358185	1	0.685901	0.0443457	0.341999	1	PWY66-389: phytol degradation
E21+E22	E3	79.9632	86.3354	544	161	435	139	88.5892	98.8197	-0.157667	0.00301174	0.0117921	1	0.631641	0.0830639	0.560004	1	PWY66-398: TCA cycle III (animals)
E21+E22	E3	100	100	544	161	544	161	525.711	643.542	-0.291765	1.98269e-05	0.000199839	0.0201838		1	1	1	PWY66-399: gluconeogenesis III
E21+E22	E3	100	100	544	161	544	161	582.552	582.878	-0.000806383	0.126254	0.222141	1		1	1	1	PWY66-400: glycolysis VI (metazoan)
E21+E22	E3	99.8162	98.7578	544	161	543	159	836.537	819.133	0.0303324	0.0193997	0.0522458	1	6.83019	0.132228	0.787184	1	PWY66-409: superpathway of purine nucleotide salvage
E21+E22	E3	100	100	544	161	544	161	4237.66	3513.19	0.270487	4.66351e-09	2.49866e-07	4.74745e-06		1	1	1	PWY66-422: D-galactose degradation V (Leloir pathway)
E21+E22	E3	99.0809	98.7578	544	161	539	159	230.034	240.731	-0.0655738	0.180043	0.277911	1	1.35597	0.661815	1	1	PWYG-321: mycolate biosynthesis
E21+E22	E3	88.7868	88.1988	544	161	483	142	243.079	363.059	-0.578775	0.0326496	0.0800898	1	1.05946	0.887526	1	1	PYRIDNUCSAL-PWY: NAD salvage pathway I
E21+E22	E3	100	100	544	161	544	161	2629.86	2707.11	-0.0417671	0.465859	0.487906	1		1	1	1	PYRIDNUCSYN-PWY: NAD biosynthesis I (from aspartate)
E21+E22	E3	99.8162	100	544	161	543	161	1439.14	1673.43	-0.217598	0.00342804	0.0131193	1	0	1	1	1	PYRIDOXSYN-PWY: pyridoxal 5'-phosphate biosynthesis I
E21+E22	E3	51.2868	57.764	544	161	279	93	31.8035	38.7981	-0.286801	0.0297054	0.0748518	1	0.769811	0.151764	0.844628	1	REDCITCYC: TCA cycle VIII (helicobacter)
E21+E22	E3	100	100	544	161	544	161	1410.49	1206.29	0.225627	2.87963e-06	4.1878e-05	0.00293146		1	1	1	RHAMCAT-PWY: L-rhamnose degradation I
E21+E22	E3	100	100	544	161	544	161	1197.58	1332.3	-0.153791	0.0635327	0.135306	1		1	1	1	RIBOSYN2-PWY: flavin biosynthesis I (bacteria and plants)
E21+E22	E3	61.0294	65.2174	544	161	332	105	34.9576	34.6465	0.0128988	0.161219	0.262175	1	0.83522	0.356389	1	1	RUMP-PWY: formaldehyde oxidation I
E21+E22	E3	100	100	544	161	544	161	1657.03	1386.39	0.257265	1.31076e-08	5.13213e-07	1.33435e-05		1	1	1	SALVADEHYPOX-PWY: adenosine nucleotides degradation II
E21+E22	E3	100	100	544	161	544	161	2391.16	2118.38	0.174752	1.08087e-06	1.9304e-05	0.00110033		1	1	1	SER-GLYSYN-PWY: superpathway of L-serine and glycine biosynthesis I
E21+E22	E3	98.8971	100	544	161	538	161	232.638	334.942	-0.525826	3.26947e-06	4.49773e-05	0.00332832	0	0.34562	1	1	SO4ASSIM-PWY: sulfate reduction I (assimilatory)
E21+E22	E3	98.8971	100	544	161	538	161	427.053	515.097	-0.27043	7.73203e-05	0.000562229	0.078712	0	0.34562	1	1	SULFATE-CYS-PWY: superpathway of sulfate assimilation and cysteine biosynthesis
E21+E22	E3	39.8897	54.6584	544	161	217	88	40.637	56.6596	-0.479526	7.41513e-05	0.000550993	0.0754861	0.550493	0.00108773	0.0199775	1	TCA-GLYOX-BYPASS: superpathway of glyoxylate bypass and TCA
E21+E22	E3	100	100	544	161	544	161	1183.76	1170.08	0.0167811	0.199504	0.29823	1		1	1	1	TCA: TCA cycle I (prokaryotic)
E21+E22	E3	22.6103	31.0559	544	161	123	50	16.3394	16.4088	-0.00611156	0.0182511	0.0496781	1	0.648599	0.0366967	0.306207	1	TEICHOICACID-PWY: teichoic acid (poly-glycerol) biosynthesis
E21+E22	E3	100	100	544	161	544	161	469.166	400.928	0.226755	2.04798e-05	0.000204397	0.0208485		1	1	1	THISYN-PWY: superpathway of thiamin diphosphate biosynthesis I
E21+E22	E3	100	100	544	161	544	161	1695	1439.41	0.235804	8.7953e-08	2.48712e-06	8.95362e-05		1	1	1	THISYNARA-PWY: superpathway of thiamin diphosphate biosynthesis III (eukaryotes)
E21+E22	E3	100	100	544	161	544	161	3229.32	3194.97	0.0154267	0.0118926	0.0358185	1		1	1	1	THRESYN-PWY: superpathway of L-threonine biosynthesis
E21+E22	E3	100	100	544	161	544	161	7755.59	7763.38	-0.00144804	0.460259	0.485303	1		1	1	1	TRNA-CHARGING-PWY: tRNA charging
E21+E22	E3	100	100	544	161	544	161	2594.34	2239.06	0.212475	3.19949e-05	0.000288237	0.0325708		1	1	1	TRPSYN-PWY: L-tryptophan biosynthesis
E21+E22	E3	22.0588	36.646	544	161	120	59	19.197	21.129	-0.138344	5.92039e-05	0.000460276	0.0602695	0.489287	0.000291877	0.00928535	0.297131	UBISYN-PWY: superpathway of ubiquinol-8 biosynthesis (prokaryotic)
E21+E22	E3	99.8162	98.1366	544	161	543	158	513.021	568.454	-0.148026	0.42626	0.46836	1	10.3101	0.0390292	0.315331	1	UDPNAGSYN-PWY: UDP-N-acetyl-D-glucosamine biosynthesis I
E21+E22	E3	22.7941	36.646	544	161	124	59	7.43032	9.65696	-0.378146	0.000146054	0.000929269	0.148683	0.510412	0.000689428	0.0152573	0.701837	URDEGR-PWY: superpathway of allantoin degradation in plants
E21+E22	E3	100	100	544	161	544	161	8155.78	7298.96	0.160132	2.05623e-07	4.65166e-06	0.000209325		1	1	1	VALSYN-PWY: L-valine biosynthesis

## Sheet: Transit time gene families
Class 1	Class2	Class 1 prevalence (%)	Class 2 prevalence (%)	Class 1 total	Class 2 total	Class 1 positives	Class 2 positives	Class 1 median relative abundance	Class 2 median relative abundance	Effect size	pvalue MWU	pvalue MWU FDR	pvalue MWU Bonferroni	oddsratio Fisher	pvalue F	pvalue F FDR	pvalue F Bonferroni	Gene family
E1	E3	97.1429	97.5155	70	161	68	157	7.1405	16.67	-1.22316	1.90294e-07	4.18926e-06	0.0023273	0.866242	1	1	1	K00001
E1	E3	100	100	70	161	70	161	31.1745	30.206	0.0455313	0.362265	0.427654	1		1	1	1	K00003
E1	E3	100	100	70	161	70	161	11.613	7.262	0.677302	6.22986e-05	0.000355867	0.761912		1	1	1	K00005
E1	E3	100	100	70	161	70	161	58.1865	36.83	0.659803	2.59378e-09	1.21076e-07	3.17219e-05		1	1	1	K00008
E1	E3	100	100	70	161	70	161	8.5635	7.043	0.28201	0.0400352	0.0922266	1		1	1	1	K00009
E1	E3	100	100	70	161	70	161	18.505	13.757	0.427749	0.000360252	0.00159402	1		1	1	1	K00010
E1	E3	100	100	70	161	70	161	17.566	17.416	0.0123724	0.231226	0.330515	1		1	1	1	K00012
E1	E3	100	100	70	161	70	161	22.9165	21.287	0.106414	0.0865174	0.166108	1		1	1	1	K00013
E1	E3	100	100	70	161	70	161	30.862	26.882	0.199191	0.0468332	0.103951	1		1	1	1	K00014
E1	E3	100	100	70	161	70	161	11.419	8.046	0.505093	6.6213e-05	0.000375074	0.809785		1	1	1	K00016
E1	E3	100	100	70	161	70	161	45.8475	38.629	0.247159	0.0500642	0.109239	1		1	1	1	K00018
E1	E3	97.1429	96.8944	70	161	68	156	1.8325	1.6995	0.108703	0.492308	0.497022	1	1.08974	1	1	1	K00020
E1	E3	24.2857	49.6894	70	161	17	80	8.973	24.4195	-1.44437	7.00119e-06	6.36614e-05	0.0856246	0.324764	0.000295226	0.00463493	1	K00021
E1	E3	100	100	70	161	70	161	40.542	43.305	-0.0951163	0.0280744	0.0701142	1		1	1	1	K00024
E1	E3	100	100	70	161	70	161	12.0415	9.946	0.275827	0.000926624	0.00369751	1		1	1	1	K00027
E1	E3	100	100	70	161	70	161	10.3775	11.33	-0.126689	0.0512924	0.111303	1		1	1	1	K00029
E1	E3	100	95.6522	70	161	70	154	4.7245	3.2185	0.553773	9.41579e-06	8.05844e-05	0.115155	inf	0.104771	0.452776	1	K00030
E1	E3	100	100	70	161	70	161	22.4685	21.134	0.088338	0.0972854	0.180601	1		1	1	1	K00031
E1	E3	100	100	70	161	70	161	12.444	10.545	0.238891	0.0989538	0.182976	1		1	1	1	K00033
E1	E3	30	20.4969	70	161	21	33	1.607	2.142	-0.414589	0.10474	0.190593	1	1.66234	0.12964	0.521326	1	K00034
E1	E3	100	100	70	161	70	161	12.3065	10.821	0.185587	0.135182	0.230261	1		1	1	1	K00036
E1	E3	100	100	70	161	70	161	36.6235	24.492	0.580459	6.47314e-07	9.84658e-06	0.00791665		1	1	1	K00040
E1	E3	100	100	70	161	70	161	70.367	57.763	0.284753	0.00494924	0.0164705	1		1	1	1	K00041
E1	E3	90	93.7888	70	161	63	151	2.329	3.15	-0.435641	0.00768696	0.0241613	1	0.596026	0.410266	1	1	K00042
E1	E3	91.4286	88.1988	70	161	64	142	40.697	29.293	0.474366	0.0301261	0.0742678	1	1.42723	0.645364	1	1	K00045
E1	E3	100	100	70	161	70	161	46.906	35.531	0.400694	4.13366e-05	0.000254299	0.505546		1	1	1	K00046
E1	E3	100	100	70	161	70	161	53.131	43.584	0.285755	0.000133613	0.000676359	1		1	1	1	K00048
E1	E3	97.1429	100	70	161	68	161	35.519	23.454	0.598757	0.00109374	0.00429364	1	0	0.0909091	0.408906	1	K00050
E1	E3	100	100	70	161	70	161	25.3735	23.761	0.094727	0.0462075	0.102973	1		1	1	1	K00052
E1	E3	100	100	70	161	70	161	28.0155	26.489	0.0808319	0.245825	0.342654	1		1	1	1	K00053
E1	E3	57.1429	53.4161	70	161	40	86	0.945	0.8165	0.210861	0.219734	0.319468	1	1.16279	0.666935	1	1	K00054
E1	E3	100	100	70	161	70	161	20.376	18.732	0.121366	0.0667171	0.13575	1		1	1	1	K00057
E1	E3	100	100	70	161	70	161	18.297	15.354	0.252993	0.00421946	0.0143305	1		1	1	1	K00058
E1	E3	100	100	70	161	70	161	24.807	19.302	0.361997	0.000261765	0.00120262	1		1	1	1	K00059
E1	E3	70	88.1988	70	161	49	142	2.977	14.22	-2.25599	2.65432e-08	8.77359e-07	0.000324623	0.312207	0.00124324	0.0131318	1	K00060
E1	E3	100	95.6522	70	161	70	154	2.3695	3.0195	-0.349727	0.28876	0.377381	1	inf	0.104771	0.452776	1	K00065
E1	E3	100	100	70	161	70	161	33.3565	25.951	0.362178	8.87477e-05	0.000479198	1		1	1	1	K00067
E1	E3	100	98.7578	70	161	70	159	3.1095	2.517	0.304977	0.0124825	0.036471	1	inf	1	1	1	K00068
E1	E3	30	42.236	70	161	21	68	0.932	1.1795	-0.339774	0.0248733	0.0635339	1	0.586134	0.105258	0.454076	1	K00073
E1	E3	100	100	70	161	70	161	28.985	23.353	0.311699	0.00243066	0.00874582	1		1	1	1	K00074
E1	E3	100	100	70	161	70	161	19.8925	16.155	0.300244	0.00228101	0.00826814	1		1	1	1	K00075
E1	E3	24.2857	40.3727	70	161	17	65	1.733	1.337	0.374272	0.0106405	0.0319346	1	0.47373	0.0244443	0.152295	1	K00076
E1	E3	100	100	70	161	70	161	31.61	27.309	0.211005	0.137524	0.233081	1		1	1	1	K00077
E1	E3	100	100	70	161	70	161	14.2405	15.07	-0.0816796	0.389492	0.443674	1		1	1	1	K00087
E1	E3	100	100	70	161	70	161	18.168	18.269	-0.00799806	0.393194	0.445578	1		1	1	1	K00088
E1	E3	30	44.0994	70	161	21	71	0.48	0.617	-0.362236	0.0199201	0.0531579	1	0.54326	0.0569812	0.289642	1	K00090
E1	E3	25.7143	39.1304	70	161	18	63	1.6965	2.262	-0.415037	0.0167709	0.0463416	1	0.538462	0.0526441	0.274792	1	K00094
E1	E3	100	100	70	161	70	161	25.7235	23.715	0.117287	0.212431	0.312954	1		1	1	1	K00096
E1	E3	100	100	70	161	70	161	31.988	28.604	0.161314	0.20353	0.304598	1		1	1	1	K00097
E1	E3	100	100	70	161	70	161	31.6975	30.209	0.0693906	0.0693906	0.139741	1		1	1	1	K00099
E1	E3	100	100	70	161	70	161	23.0465	23.94	-0.0548755	0.266154	0.359225	1		1	1	1	K00100
E1	E3	37.1429	49.6894	70	161	26	80	0.3685	0.422	-0.195578	0.0328679	0.0793162	1	0.598295	0.0861981	0.395128	1	K00101
E1	E3	100	100	70	161	70	161	13.21	12.853	0.0395253	0.472246	0.487719	1		1	1	1	K00104
E1	E3	24.2857	36.646	70	161	17	59	0.497	0.572	-0.202769	0.025804	0.0655007	1	0.554525	0.0696735	0.340707	1	K00108
E1	E3	100	100	70	161	70	161	13.678	10.888	0.329118	0.00206166	0.00755592	1		1	1	1	K00111
E1	E3	88.5714	95.6522	70	161	62	154	4.5555	4.527	0.0090541	0.0636945	0.13112	1	0.352273	0.0764621	0.362735	1	K00112
E1	E3	92.8571	97.5155	70	161	65	157	2.665	2.734	-0.0368777	0.0491803	0.107714	1	0.33121	0.134399	0.533321	1	K00113
E1	E3	24.2857	43.4783	70	161	17	70	0.752	0.5725	0.393457	0.00348236	0.0120821	1	0.416981	0.00756216	0.0575514	1	K00116
E1	E3	34.2857	45.9627	70	161	24	74	0.911	1.07	-0.232088	0.0341421	0.0817459	1	0.613396	0.112163	0.47367	1	K00117
E1	E3	42.8571	52.1739	70	161	30	84	0.2825	0.4465	-0.660409	0.0692522	0.139554	1	0.6875	0.201167	0.70881	1	K00121
E1	E3	92.8571	90.0621	70	161	65	145	0.504	1.338	-1.40858	0.00049199	0.00209507	1	1.43448	0.622295	1	1	K00123
E1	E3	54.2857	63.9752	70	161	38	103	0.398	0.336	0.244307	0.183175	0.284041	1	0.668689	0.187441	0.678827	1	K00124
E1	E3	27.1429	49.0683	70	161	19	79	9.817	34.584	-1.81675	3.23253e-05	0.000208953	0.395338	0.386696	0.00227739	0.0212129	1	K00125
E1	E3	55.7143	59.0062	70	161	39	95	0.541	0.534	0.0187889	0.463635	0.483692	1	0.874024	0.665394	1	1	K00127
E1	E3	100	100	70	161	70	161	19.0815	15.747	0.277098	0.0264591	0.0668447	1		1	1	1	K00128
E1	E3	27.1429	42.236	70	161	19	68	0.934	0.742	0.332003	0.0239958	0.0619114	1	0.509516	0.0382427	0.216229	1	K00130
E1	E3	100	100	70	161	70	161	23.423	20.783	0.172522	0.00297302	0.0104784	1		1	1	1	K00133
E1	E3	100	100	70	161	70	161	16.6455	17.248	-0.0512969	0.161409	0.259856	1		1	1	1	K00134
E1	E3	34.2857	49.0683	70	161	24	79	0.154	0.217	-0.494765	0.0141132	0.0402622	1	0.541552	0.0440516	0.242026	1	K00135
E1	E3	27.1429	37.2671	70	161	19	60	0.695	0.8135	-0.227129	0.0530153	0.11405	1	0.627124	0.17423	0.646099	1	K00137
E1	E3	34.2857	45.3416	70	161	24	73	0.3285	0.499	-0.603146	0.0292911	0.0724576	1	0.628946	0.146871	0.568068	1	K00138
E1	E3	100	100	70	161	70	161	36.259	34.365	0.0773992	0.140848	0.236943	1		1	1	1	K00145
E1	E3	100	100	70	161	70	161	23.89	21.895	0.125805	0.0846743	0.163442	1		1	1	1	K00147
E1	E3	30	53.4161	70	161	21	86	4.316	15.1025	-1.80702	1.68875e-05	0.000126708	0.206534	0.373754	0.00148992	0.0147784	1	K00150
E1	E3	100	100	70	161	70	161	14.2065	20.231	-0.510016	0.000215038	0.00101502	1		1	1	1	K00156
E1	E3	37.1429	30.4348	70	161	26	49	0.2195	0.274	-0.319955	0.160409	0.258996	1	1.35065	0.359713	0.993488	1	K00158
E1	E3	72.8571	70.8075	70	161	51	114	0.924	0.711	0.378043	0.172848	0.272906	1	1.10665	0.874232	1	1	K00161
E1	E3	95.7143	96.2733	70	161	67	155	2.103	6.838	-1.70113	7.08818e-07	1.05024e-05	0.00866884	0.864516	1	1	1	K00162
E1	E3	48.5714	50.3106	70	161	34	81	0.5015	0.453	0.146739	0.374565	0.434575	1	0.932785	0.886336	1	1	K00163
E1	E3	72.8571	86.9565	70	161	51	140	2.012	10.0365	-2.31855	1.19082e-07	2.94216e-06	0.00145637	0.402632	0.0133718	0.0933965	1	K00164
E1	E3	100	100	70	161	70	161	6.8345	7.12	-0.0590414	0.482912	0.492866	1		1	1	1	K00169
E1	E3	100	100	70	161	70	161	6.657	11.812	-0.827309	6.33941e-05	0.00036145	0.77531		1	1	1	K00170
E1	E3	95.7143	96.8944	70	161	67	156	9.581	10.9655	-0.194723	0.181278	0.281993	1	0.715812	0.701149	1	1	K00171
E1	E3	100	99.3789	70	161	70	160	5.64	5.8695	-0.0575424	0.392782	0.445449	1	inf	1	1	1	K00172
E1	E3	100	100	70	161	70	161	39.9875	40.338	-0.0125905	0.361863	0.427491	1		1	1	1	K00174
E1	E3	100	100	70	161	70	161	21.869	22.363	-0.0322265	0.389903	0.443808	1		1	1	1	K00175
E1	E3	100	100	70	161	70	161	24.44	22.751	0.103314	0.499573	0.499939	1		1	1	1	K00176
E1	E3	100	100	70	161	70	161	26.1505	26.793	-0.0350176	0.475231	0.489358	1		1	1	1	K00177
E1	E3	100	100	70	161	70	161	27.862	31.049	-0.156248	0.0587954	0.123261	1		1	1	1	K00179
E1	E3	100	100	70	161	70	161	28.877	31.363	-0.119143	0.107215	0.193942	1		1	1	1	K00180
E1	E3	24.2857	22.3602	70	161	17	36	3.539	2.535	0.481356	0.387245	0.442742	1	1.11373	0.736733	1	1	K00183
E1	E3	87.1429	95.0311	70	161	61	153	3.032	5.516	-0.863353	7.38791e-05	0.000409899	0.903542	0.354394	0.0520576	0.273247	1	K00184
E1	E3	85.7143	89.441	70	161	60	144	3.6125	9.218	-1.35146	1.20381e-06	1.5492e-05	0.0147226	0.708333	0.504003	1	1	K00185
E1	E3	25.7143	50.3106	70	161	18	81	15.784	37.953	-1.26575	1.68159e-05	0.000126326	0.205658	0.34188	0.0005145	0.00675143	1	K00187
E1	E3	22.8571	49.6894	70	161	16	80	10.631	23.8525	-1.16586	1.08406e-05	9.00072e-05	0.132581	0.3	0.000144929	0.00321929	1	K00188
E1	E3	100	99.3789	70	161	70	160	46.093	29.012	0.667898	1.36194e-06	1.713e-05	0.0166565	inf	1	1	1	K00194
E1	E3	48.5714	72.0497	70	161	34	116	4.6295	11.7045	-1.33814	3.13625e-06	3.3705e-05	0.0383563	0.366379	0.000897138	0.0100661	1	K00196
E1	E3	100	100	70	161	70	161	40.145	30.456	0.398494	2.13007e-07	4.49927e-06	0.00260508		1	1	1	K00198
E1	E3	30	49.6894	70	161	21	80	15.95	45.4105	-1.50947	8.7009e-05	0.000471685	1	0.433929	0.00615904	0.0481003	1	K00200
E1	E3	27.1429	50.3106	70	161	19	81	8.473	22.981	-1.4395	3.32322e-05	0.000214249	0.40643	0.36795	0.00139459	0.0141778	1	K00201
E1	E3	27.1429	50.9317	70	161	19	82	14.552	40.069	-1.46127	2.00135e-05	0.000144917	0.244765	0.358919	0.00087884	0.00988796	1	K00202
E1	E3	25.7143	49.6894	70	161	18	80	5.5445	15.442	-1.47773	2.06617e-05	0.000148133	0.252692	0.350481	0.000814796	0.00941868	1	K00203
E1	E3	22.8571	46.5839	70	161	16	75	35.3245	75.491	-1.09564	4.2019e-05	0.000257461	0.513892	0.339753	0.000720472	0.00873278	1	K00204
E1	E3	28.5714	49.0683	70	161	20	79	25.2035	78.604	-1.64098	7.25313e-05	0.000404126	0.887057	0.41519	0.00393852	0.0327229	1	K00205
E1	E3	100	100	70	161	70	161	7.9595	10.097	-0.343177	0.00456421	0.0153606	1		1	1	1	K00208
E1	E3	100	96.8944	70	161	70	156	10.9835	7.334	0.582666	0.0115445	0.0341698	1	inf	0.326145	0.929561	1	K00209
E1	E3	98.5714	100	70	161	69	161	186.024	214.752	-0.207183	0.178753	0.279656	1	0	0.30303	0.899109	1	K00210
E1	E3	100	100	70	161	70	161	23.616	20.648	0.193763	0.0284907	0.0709512	1		1	1	1	K00215
E1	E3	27.1429	36.0248	70	161	19	58	0.784	0.7725	0.0213187	0.108222	0.195473	1	0.661596	0.225056	0.753272	1	K00216
E1	E3	67.1429	70.8075	70	161	47	114	1.074	1.148	-0.0961286	0.231682	0.33079	1	0.842487	0.640785	1	1	K00219
E1	E3	100	100	70	161	70	161	11.0985	11.966	-0.108576	0.0952741	0.177731	1		1	1	1	K00226
E1	E3	31.4286	39.7516	70	161	22	64	0.34	0.3675	-0.11221	0.114572	0.203961	1	0.694661	0.24046	0.781951	1	K00228
E1	E3	90	90.6832	70	161	63	146	4.519	6.515	-0.527762	0.0948159	0.177228	1	0.924658	1	1	1	K00230
E1	E3	100	100	70	161	70	161	54.6425	45.156	0.275106	8.80527e-06	7.63748e-05	0.107688		1	1	1	K00239
E1	E3	100	100	70	161	70	161	48.1395	41.578	0.211401	0.0306505	0.0752874	1		1	1	1	K00240
E1	E3	100	100	70	161	70	161	10.468	14.671	-0.486981	5.37774e-06	5.19098e-05	0.0657697		1	1	1	K00241
E1	E3	21.4286	35.4037	70	161	15	57	1.252	1.52	-0.279837	0.0197455	0.0527842	1	0.497608	0.044149	0.242235	1	K00242
E1	E3	100	100	70	161	70	161	31.276	21.743	0.524505	1.06202e-05	8.83914e-05	0.129884		1	1	1	K00243
E1	E3	100	100	70	161	70	161	7.835	5.907	0.407508	0.0030817	0.0108178	1		1	1	1	K00244
E1	E3	80	75.1553	70	161	56	121	0.867	1.155	-0.413789	0.325737	0.404896	1	1.32231	0.50005	1	1	K00245
E1	E3	41.4286	42.236	70	161	29	68	1.166	0.932	0.323166	0.484761	0.493753	1	0.96736	1	1	1	K00246
E1	E3	27.1429	36.646	70	161	19	59	0.652	0.644	0.0178113	0.054676	0.116801	1	0.644068	0.175726	0.650266	1	K00247
E1	E3	100	100	70	161	70	161	16.709	13.685	0.28803	0.0191003	0.0514303	1		1	1	1	K00248
E1	E3	78.5714	88.1988	70	161	55	142	2.009	11.181	-2.4765	2.8093e-07	5.54157e-06	0.00343577	0.49061	0.0694903	0.340492	1	K00254
E1	E3	98.5714	100	70	161	69	161	20.582	18.015	0.192185	0.187849	0.288797	1	0	0.30303	0.899109	1	K00257
E1	E3	100	100	70	161	70	161	29.3345	28.844	0.0243272	0.482485	0.492636	1		1	1	1	K00259
E1	E3	100	100	70	161	70	161	31.192	31.008	0.00853558	0.467985	0.485614	1		1	1	1	K00262
E1	E3	100	100	70	161	70	161	18.201	19.111	-0.0703856	0.0757455	0.149342	1		1	1	1	K00265
E1	E3	100	100	70	161	70	161	41.387	32.986	0.327324	0.00012394	0.000635015	1		1	1	1	K00266
E1	E3	98.5714	100	70	161	69	161	9.277	12.312	-0.408335	0.000483	0.00206542	1	0	0.30303	0.899109	1	K00275
E1	E3	100	100	70	161	70	161	29.1705	25.985	0.166831	0.197226	0.298339	1		1	1	1	K00278
E1	E3	100	100	70	161	70	161	29.3475	33.22	-0.178814	0.0104304	0.0314197	1		1	1	1	K00281
E1	E3	72.8571	87.5776	70	161	51	141	4.248	4.639	-0.12703	0.00545058	0.0179533	1	0.380739	0.0119833	0.0850093	1	K00282
E1	E3	48.5714	73.913	70	161	34	119	1.562	1.929	-0.304459	0.000695912	0.00286276	1	0.333333	0.000263688	0.00446008	1	K00283
E1	E3	100	100	70	161	70	161	43.123	21.872	0.979372	7.50699e-05	0.00041562	0.918105		1	1	1	K00284
E1	E3	22.8571	37.2671	70	161	16	60	0.4565	0.4985	-0.126979	0.0143083	0.0407335	1	0.498765	0.0339263	0.197111	1	K00285
E1	E3	100	100	70	161	70	161	29.627	24.96	0.247295	0.00473847	0.0158684	1		1	1	1	K00286
E1	E3	100	100	70	161	70	161	23.721	19.886	0.254412	0.0524297	0.113069	1		1	1	1	K00287
E1	E3	100	100	70	161	70	161	38.3445	33.985	0.174122	0.000923271	0.00368766	1		1	1	1	K00290
E1	E3	92.8571	99.3789	70	161	65	160	37.107	41.281	-0.153787	0.0230477	0.0598966	1	0.08125	0.0105218	0.0763687	1	K00294
E1	E3	100	100	70	161	70	161	37.174	35.72	0.0575619	0.435753	0.469001	1		1	1	1	K00297
E1	E3	28.5714	40.9938	70	161	20	66	0.8755	0.811	0.110405	0.0470444	0.104245	1	0.575758	0.0775529	0.366772	1	K00299
E1	E3	52.8571	64.5963	70	161	37	104	14.411	15.257	-0.0823009	0.0632109	0.13041	1	0.61451	0.107038	0.459001	1	K00303
E1	E3	54.2857	60.2484	70	161	38	97	0.827	1.014	-0.294098	0.137463	0.233075	1	0.783505	0.467889	1	1	K00313
E1	E3	21.4286	47.8261	70	161	15	77	9.656	29.615	-1.61683	4.83318e-06	4.75542e-05	0.0591098	0.297521	0.000141915	0.00319048	1	K00319
E1	E3	25.7143	50.9317	70	161	18	82	11.209	27.881	-1.31462	1.67311e-05	0.000126104	0.204621	0.33349	0.000479965	0.00649333	1	K00320
E1	E3	34.2857	40.9938	70	161	24	66	0.224	0.512	-1.19265	0.0910323	0.172128	1	0.750988	0.3799	1	1	K00322
E1	E3	90	93.1677	70	161	63	150	2.25	2.1525	0.0639118	0.490597	0.496607	1	0.66	0.429158	1	1	K00324
E1	E3	87.1429	89.441	70	161	61	144	0.551	0.623	-0.17718	0.19439	0.295583	1	0.800154	0.652605	1	1	K00325
E1	E3	100	100	70	161	70	161	15.501	17.103	-0.141888	0.0445718	0.100315	1		1	1	1	K00330
E1	E3	100	100	70	161	70	161	18.103	20.436	-0.174884	0.00965696	0.0293939	1		1	1	1	K00331
E1	E3	57.1429	80.7453	70	161	40	130	11.8065	40.103	-1.76413	1.10396e-07	2.8159e-06	0.00135014	0.317949	0.00031309	0.00479836	1	K00332
E1	E3	55.7143	81.9876	70	161	39	132	6.467	20.203	-1.6434	3.21179e-08	1.03369e-06	0.000392801	0.276393	6.70247e-05	0.0022644	0.819712	K00333
E1	E3	100	100	70	161	70	161	13.0695	14.146	-0.11419	0.113678	0.202783	1		1	1	1	K00334
E1	E3	100	100	70	161	70	161	11.2625	12.46	-0.145777	0.0457941	0.102276	1		1	1	1	K00335
E1	E3	100	100	70	161	70	161	29.096	20.193	0.526966	3.80464e-08	1.19925e-06	0.000465308		1	1	1	K00336
E1	E3	100	100	70	161	70	161	30.2035	33.191	-0.136076	0.0414405	0.0948208	1		1	1	1	K00337
E1	E3	100	100	70	161	70	161	15.52	16.211	-0.0628445	0.0518586	0.112114	1		1	1	1	K00338
E1	E3	100	100	70	161	70	161	43.962	45.688	-0.0555583	0.0537039	0.115208	1		1	1	1	K00339
E1	E3	100	100	70	161	70	161	14.3355	20.432	-0.511238	3.74621e-05	0.000234714	0.458161		1	1	1	K00340
E1	E3	100	100	70	161	70	161	16.454	14.987	0.134727	0.132638	0.227321	1		1	1	1	K00341
E1	E3	100	100	70	161	70	161	28.332	29.515	-0.0590159	0.0983954	0.182342	1		1	1	1	K00342
E1	E3	100	100	70	161	70	161	30.7655	32.762	-0.09071	0.0252993	0.0644605	1		1	1	1	K00343
E1	E3	31.4286	43.4783	70	161	22	70	0.524	0.7445	-0.506705	0.0356569	0.0846436	1	0.595833	0.107569	0.460313	1	K00344
E1	E3	98.5714	100	70	161	69	161	39.477	41.213	-0.0620871	0.188427	0.28948	1	0	0.30303	0.899109	1	K00346
E1	E3	98.5714	100	70	161	69	161	23.051	20.59	0.162886	0.269682	0.362242	1	0	0.30303	0.899109	1	K00347
E1	E3	100	100	70	161	70	161	28.675	28.193	0.0244565	0.363872	0.42827	1		1	1	1	K00348
E1	E3	98.5714	100	70	161	69	161	13.877	9.462	0.552479	1.062e-05	8.83914e-05	0.129883	0	0.30303	0.899109	1	K00349
E1	E3	98.5714	100	70	161	69	161	24.581	23.202	0.0832944	0.401456	0.450928	1	0	0.30303	0.899109	1	K00350
E1	E3	98.5714	100	70	161	69	161	25.643	23.788	0.108331	0.165639	0.264598	1	0	0.30303	0.899109	1	K00351
E1	E3	85.7143	94.4099	70	161	60	152	4.684	4.2045	0.155807	0.174516	0.274866	1	0.355263	0.0365784	0.209828	1	K00355
E1	E3	31.4286	47.8261	70	161	22	77	0.4685	0.457	0.0358549	0.00805899	0.0251882	1	0.5	0.021497	0.13686	1	K00362
E1	E3	27.1429	39.7516	70	161	19	64	1.167	1.011	0.207022	0.0335014	0.0805429	1	0.564645	0.0744176	0.356075	1	K00363
E1	E3	57.1429	56.5217	70	161	40	91	0.2775	0.26	0.0939761	0.431685	0.46746	1	1.02564	1	1	1	K00364
E1	E3	100	95.0311	70	161	70	153	13.977	8.909	0.649719	2.81484e-07	5.54355e-06	0.00344254	inf	0.109823	0.46722	1	K00366
E1	E3	52.8571	54.6584	70	161	37	88	0.441	0.337	0.38803	0.477083	0.490117	1	0.930096	0.885897	1	1	K00370
E1	E3	40	49.0683	70	161	28	79	0.235	0.361	-0.619338	0.0332568	0.0800335	1	0.691983	0.25083	0.801906	1	K00371
E1	E3	47.1429	49.6894	70	161	33	80	0.614	0.76	-0.307761	0.214969	0.315311	1	0.903041	0.775313	1	1	K00373
E1	E3	48.5714	47.8261	70	161	34	77	0.6895	0.653	0.0784676	0.486638	0.494564	1	1.0303	1	1	1	K00374
E1	E3	100	100	70	161	70	161	28.3205	19.941	0.506109	0.00193282	0.00712216	1		1	1	1	K00375
E1	E3	71.4286	88.1988	70	161	50	142	3.805	15.399	-2.01687	8.66414e-08	2.37515e-06	0.00105962	0.334507	0.00359398	0.030932	1	K00380
E1	E3	55.7143	72.0497	70	161	39	116	2.474	7.024	-1.50545	0.000967817	0.00384299	1	0.488042	0.0218332	0.138496	1	K00381
E1	E3	100	100	70	161	70	161	16.9565	18.149	-0.0980516	0.0616096	0.127839	1		1	1	1	K00382
E1	E3	58.5714	60.2484	70	161	41	97	0.208	0.221	-0.0874628	0.486301	0.494372	1	0.932812	0.884126	1	1	K00383
E1	E3	100	100	70	161	70	161	25.0125	22.223	0.170596	0.0240003	0.0619114	1		1	1	1	K00384
E1	E3	34.2857	45.9627	70	161	24	74	2.678	2.3485	0.189416	0.106458	0.192894	1	0.613396	0.112163	0.47367	1	K00389
E1	E3	95.7143	100	70	161	67	161	4.226	8.235	-0.962476	0.000165679	0.000808882	1	0	0.0269948	0.165404	1	K00390
E1	E3	100	100	70	161	70	161	29.696	23.96	0.309641	0.029339	0.0725319	1		1	1	1	K00394
E1	E3	100	100	70	161	70	161	33.7315	30.114	0.163662	0.0785337	0.153699	1		1	1	1	K00395
E1	E3	27.1429	51.5528	70	161	19	83	10.009	29.966	-1.58203	1.46724e-05	0.0001135	0.179444	0.350106	0.000844262	0.00966791	1	K00400
E1	E3	25.7143	49.6894	70	161	18	80	5.31	15.5395	-1.54916	1.61144e-05	0.000122486	0.197079	0.350481	0.000814796	0.00941868	1	K00401
E1	E3	30	52.1739	70	161	21	84	4.021	11.761	-1.54838	3.42499e-05	0.000218963	0.418877	0.392857	0.00242528	0.0220644	1	K00402
E1	E3	100	100	70	161	70	161	11.632	13.291	-0.19235	0.0044234	0.0149442	1		1	1	1	K00425
E1	E3	100	100	70	161	70	161	9.926	11.377	-0.196836	0.0174672	0.0478763	1		1	1	1	K00426
E1	E3	25.7143	37.8882	70	161	18	61	0.5995	0.611	-0.0274126	0.0298118	0.0735819	1	0.567465	0.0964851	0.428784	1	K00427
E1	E3	90	95.0311	70	161	63	153	5.987	16.821	-1.49036	5.83165e-06	5.51593e-05	0.071321	0.470588	0.158703	0.60128	1	K00428
E1	E3	100	100	70	161	70	161	8.47	6.158	0.4599	0.00106664	0.00419458	1		1	1	1	K00432
E1	E3	30	49.6894	70	161	21	80	13.717	45.421	-1.72739	6.02753e-05	0.000346413	0.737167	0.433929	0.00615904	0.0481003	1	K00440
E1	E3	28.5714	50.3106	70	161	20	81	11.99	33.108	-1.46535	6.05667e-05	0.000347761	0.740731	0.395062	0.0024276	0.0220644	1	K00441
E1	E3	30	49.6894	70	161	21	80	5.52	22.0945	-2.00095	8.53823e-05	0.0004641	1	0.433929	0.00615904	0.0481003	1	K00442
E1	E3	25.7143	49.0683	70	161	18	79	11.547	39.756	-1.78365	2.70745e-05	0.000181039	0.331121	0.359299	0.00132177	0.013711	1	K00443
E1	E3	100	100	70	161	70	161	19.467	20.381	-0.0661943	0.0192504	0.0517546	1		1	1	1	K00525
E1	E3	100	100	70	161	70	161	10.7225	10.807	-0.0113248	0.311858	0.395153	1		1	1	1	K00526
E1	E3	100	100	70	161	70	161	22.4585	20.965	0.0992787	0.0790058	0.154475	1		1	1	1	K00527
E1	E3	100	100	70	161	70	161	28.7945	23.844	0.272167	0.0017204	0.00640695	1		1	1	1	K00528
E1	E3	100	98.1366	70	161	70	158	99.8875	70.3405	0.505949	0.00564975	0.0185394	1	inf	0.555379	1	1	K00533
E1	E3	100	98.1366	70	161	70	158	1.678	2.862	-0.770281	0.00387339	0.0132768	1	inf	0.555379	1	1	K00537
E1	E3	100	97.5155	70	161	70	157	3.467	3.373	0.0396555	0.271454	0.363942	1	inf	0.317468	0.918173	1	K00540
E1	E3	100	100	70	161	70	161	15.6805	11.994	0.386659	0.00104767	0.00412923	1		1	1	1	K00547
E1	E3	100	100	70	161	70	161	29.65	25.286	0.229693	0.0305024	0.075044	1		1	1	1	K00548
E1	E3	100	100	70	161	70	161	5.289	4.994	0.0827992	0.34317	0.416903	1		1	1	1	K00549
E1	E3	100	100	70	161	70	161	14.313	14.988	-0.0664818	0.314515	0.397244	1		1	1	1	K00554
E1	E3	28.5714	50.9317	70	161	20	82	9.1135	28.241	-1.63171	2.09121e-05	0.000148962	0.255755	0.385366	0.00233753	0.0214625	1	K00555
E1	E3	92.8571	100	70	161	65	161	10.158	15.306	-0.591481	2.16954e-05	0.000153648	0.265335	0	0.00230642	0.0213552	1	K00556
E1	E3	52.8571	53.4161	70	161	37	86	0.61	0.539	0.178524	0.431784	0.46746	1	0.977801	1	1	1	K00557
E1	E3	100	100	70	161	70	161	16.616	14.493	0.197217	0.0540555	0.115718	1		1	1	1	K00558
E1	E3	100	100	70	161	70	161	11.6815	12.455	-0.0924995	0.0878765	0.168084	1		1	1	1	K00560
E1	E3	91.4286	90.6832	70	161	64	146	27.7495	15.5135	0.838938	0.00770064	0.0241981	1	1.09589	1	1	1	K00561
E1	E3	100	100	70	161	70	161	17.0985	14.406	0.2472	0.124764	0.217297	1		1	1	1	K00563
E1	E3	67.1429	70.8075	70	161	47	114	0.714	0.6445	0.147744	0.365686	0.429208	1	0.842487	0.640785	1	1	K00564
E1	E3	100	100	70	161	70	161	35.877	28.987	0.307653	0.0433759	0.0983113	1		1	1	1	K00566
E1	E3	100	100	70	161	70	161	11.3705	11.816	-0.055446	0.121707	0.213127	1		1	1	1	K00567
E1	E3	34.2857	42.236	70	161	24	68	0.447	0.8495	-0.926339	0.0464854	0.103442	1	0.713555	0.306453	0.902242	1	K00568
E1	E3	100	100	70	161	70	161	10.6225	10.758	-0.0182866	0.408929	0.455649	1		1	1	1	K00571
E1	E3	37.1429	47.205	70	161	26	76	0.352	0.5895	-0.743916	0.0476717	0.105177	1	0.660885	0.194487	0.695898	1	K00573
E1	E3	100	98.7578	70	161	70	159	12.3395	7.498	0.718706	3.71165e-09	1.63875e-07	4.53935e-05	inf	1	1	1	K00574
E1	E3	100	98.7578	70	161	70	159	10.823	6.654	0.701807	0.000129769	0.00066018	1	inf	1	1	1	K00575
E1	E3	24.2857	47.8261	70	161	17	77	12.766	31.533	-1.30456	2.19956e-05	0.000155136	0.269006	0.349914	0.000803418	0.00941868	1	K00577
E1	E3	22.8571	46.5839	70	161	16	75	6.7655	14.339	-1.08368	7.70542e-05	0.000424492	0.942373	0.339753	0.000720472	0.00873278	1	K00581
E1	E3	28.5714	49.6894	70	161	20	80	15.5615	55.8955	-1.84475	4.79107e-05	0.000285735	0.585948	0.405	0.00371818	0.0314042	1	K00584
E1	E3	27.1429	49.6894	70	161	19	80	9.63	24.7285	-1.36057	3.8847e-05	0.000241535	0.475099	0.377206	0.00148695	0.0147729	1	K00586
E1	E3	100	100	70	161	70	161	48.433	33.464	0.53338	0.000286819	0.00130693	1		1	1	1	K00595
E1	E3	71.4286	86.3354	70	161	50	139	3.4265	2.659	0.365852	0.136565	0.231775	1	0.395683	0.00932698	0.0686748	1	K00598
E1	E3	100	100	70	161	70	161	15.0975	13.149	0.199357	0.00276595	0.00981649	1		1	1	1	K00600
E1	E3	100	100	70	161	70	161	25.773	25.484	0.0162687	0.3487	0.420304	1		1	1	1	K00602
E1	E3	100	100	70	161	70	161	23.1595	22.391	0.0486851	0.355061	0.423689	1		1	1	1	K00603
E1	E3	100	100	70	161	70	161	20.004	18.815	0.0884052	0.133328	0.227961	1		1	1	1	K00604
E1	E3	100	100	70	161	70	161	41.8575	49.595	-0.244709	0.00150829	0.00569828	1		1	1	1	K00605
E1	E3	100	100	70	161	70	161	31.152	30.733	0.0195362	0.377631	0.436566	1		1	1	1	K00606
E1	E3	100	100	70	161	70	161	15.7285	16.328	-0.053967	0.450133	0.477213	1		1	1	1	K00609
E1	E3	100	100	70	161	70	161	35.648	25.665	0.474019	9.64902e-06	8.24074e-05	0.118007		1	1	1	K00610
E1	E3	100	100	70	161	70	161	23.823	21.479	0.149428	0.0936516	0.175642	1		1	1	1	K00611
E1	E3	91.4286	93.7888	70	161	64	151	4.561	4.133	0.142161	0.467553	0.485477	1	0.706402	0.57524	1	1	K00613
E1	E3	100	100	70	161	70	161	24.859	21.086	0.237483	0.00386114	0.0132421	1		1	1	1	K00615
E1	E3	100	100	70	161	70	161	20.773	17.626	0.237004	0.00624573	0.0202614	1		1	1	1	K00616
E1	E3	100	100	70	161	70	161	40.118	30.11	0.414007	0.000286819	0.00130693	1		1	1	1	K00620
E1	E3	100	100	70	161	70	161	33.056	28.037	0.23758	0.00179282	0.00664631	1		1	1	1	K00625
E1	E3	100	100	70	161	70	161	14.0865	10.942	0.364437	3.83108e-05	0.000239418	0.468541		1	1	1	K00626
E1	E3	77.1429	90.0621	70	161	54	145	0.931	3.744	-2.00773	1.87867e-07	4.17094e-06	0.00229762	0.372414	0.0125924	0.088866	1	K00627
E1	E3	57.1429	54.0373	70	161	40	87	0.7925	0.755	0.0699343	0.368869	0.431123	1	1.1341	0.773659	1	1	K00631
E1	E3	34.2857	50.9317	70	161	24	82	0.3365	0.503	-0.579952	0.00820811	0.0255823	1	0.502651	0.0219045	0.138876	1	K00632
E1	E3	88.5714	89.441	70	161	62	144	4.3095	5.139	-0.253967	0.474362	0.488954	1	0.914931	0.821286	1	1	K00633
E1	E3	98.5714	100	70	161	69	161	51.466	44.25	0.217942	0.11492	0.204521	1	0	0.30303	0.899109	1	K00634
E1	E3	100	100	70	161	70	161	22.486	31.742	-0.497366	8.03216e-06	7.08754e-05	0.0982333		1	1	1	K00639
E1	E3	100	100	70	161	70	161	13.9075	13.708	0.020845	0.376411	0.435773	1		1	1	1	K00640
E1	E3	90	100	70	161	63	161	6.046	18.656	-1.62559	1.5323e-11	1.5773e-09	1.874e-07	0	0.000188687	0.0037003	1	K00641
E1	E3	100	100	70	161	70	161	28.356	26.589	0.0928245	0.102928	0.188295	1		1	1	1	K00645
E1	E3	98.5714	100	70	161	69	161	18.805	18.236	0.044327	0.477364	0.490189	1	0	0.30303	0.899109	1	K00647
E1	E3	100	100	70	161	70	161	23.8505	21.189	0.170704	0.193677	0.29494	1		1	1	1	K00648
E1	E3	100	100	70	161	70	161	31.87	25.121	0.343305	0.000357454	0.00158336	1		1	1	1	K00651
E1	E3	100	100	70	161	70	161	20.411	21.794	-0.0945841	0.126312	0.219284	1		1	1	1	K00652
E1	E3	100	100	70	161	70	161	27.0995	22.738	0.253161	0.0229902	0.0597853	1		1	1	1	K00655
E1	E3	100	100	70	161	70	161	18.832	15.495	0.281383	0.00030675	0.00138946	1		1	1	1	K00656
E1	E3	98.5714	100	70	161	69	161	6.064	6.279	-0.0502651	0.0679733	0.137794	1	0	0.30303	0.899109	1	K00657
E1	E3	98.5714	100	70	161	69	161	2.511	4.333	-0.787104	6.67904e-05	0.000377995	0.816847	0	0.30303	0.899109	1	K00658
E1	E3	100	100	70	161	70	161	16.676	16.633	0.00372487	0.277884	0.369372	1		1	1	1	K00661
E1	E3	94.2857	97.5155	70	161	66	157	18.693	18.381	0.0242829	0.373565	0.433949	1	0.420382	0.248803	0.797606	1	K00662
E1	E3	40	42.8571	70	161	28	69	5.066	4.849	0.0631598	0.483809	0.493308	1	0.888889	0.772063	1	1	K00663
E1	E3	100	100	70	161	70	161	9.6405	9.379	0.0396739	0.437441	0.470073	1		1	1	1	K00666
E1	E3	27.1429	49.6894	70	161	19	80	13.674	34.967	-1.35456	2.43427e-05	0.000167254	0.297712	0.377206	0.00148695	0.0147729	1	K00672
E1	E3	27.1429	43.4783	70	161	19	70	0.466	0.4385	0.0877531	0.0144578	0.0410444	1	0.484314	0.0194505	0.126474	1	K00673
E1	E3	100	100	70	161	70	161	4.6085	4.976	-0.110689	0.0455885	0.101966	1		1	1	1	K00674
E1	E3	92.8571	91.3043	70	161	65	147	5.791	4.898	0.24162	0.0893642	0.170052	1	1.2381	0.799117	1	1	K00675
E1	E3	100	100	70	161	70	161	26.9615	28.437	-0.0768685	0.101401	0.186122	1		1	1	1	K00677
E1	E3	98.5714	96.2733	70	161	69	155	2.485	2.211	0.168547	0.00423211	0.0143694	1	2.67097	0.678161	1	1	K00681
E1	E3	98.5714	100	70	161	69	161	32.589	30.41	0.0998393	0.0782202	0.153233	1	0	0.30303	0.899109	1	K00684
E1	E3	100	100	70	161	70	161	44.2765	38.117	0.216107	0.0203296	0.0541091	1		1	1	1	K00688
E1	E3	98.5714	99.3789	70	161	69	160	18.865	11.2385	0.747263	0.00247972	0.00889614	1	0.43125	0.515152	1	1	K00690
E1	E3	91.4286	99.3789	70	161	64	160	3.519	4.8725	-0.469497	0.00774197	0.0243217	1	0.0666667	0.00351134	0.0304565	1	K00691
E1	E3	51.4286	57.764	70	161	36	93	0.5655	0.688	-0.282882	0.145856	0.24263	1	0.774194	0.390169	1	1	K00694
E1	E3	28.5714	43.4783	70	161	20	70	0.9785	1.255	-0.359044	0.00909447	0.0279358	1	0.52	0.039784	0.222173	1	K00697
E1	E3	100	100	70	161	70	161	29.5865	29.353	0.0114311	0.367498	0.430425	1		1	1	1	K00700
E1	E3	100	100	70	161	70	161	53.683	42.077	0.351433	0.000398543	0.00174639	1		1	1	1	K00702
E1	E3	100	100	70	161	70	161	33.5655	27.6	0.282311	0.00160559	0.00602093	1		1	1	1	K00703
E1	E3	100	100	70	161	70	161	31.7655	28.57	0.15296	0.175415	0.276032	1		1	1	1	K00705
E1	E3	100	100	70	161	70	161	24.9705	23.432	0.0917446	0.0757455	0.149342	1		1	1	1	K00721
E1	E3	100	100	70	161	70	161	10.051	11.976	-0.252807	0.00420617	0.0142933	1		1	1	1	K00748
E1	E3	100	100	70	161	70	161	7.3875	5.347	0.466357	9.70515e-05	0.000513829	1		1	1	1	K00756
E1	E3	100	100	70	161	70	161	14.346	13.808	0.0551442	0.181565	0.282332	1		1	1	1	K00757
E1	E3	30	44.7205	70	161	21	72	0.434	0.5475	-0.335164	0.0194618	0.0521397	1	0.529762	0.0413468	0.229697	1	K00758
E1	E3	100	100	70	161	70	161	18.3635	14.796	0.311634	1.70411e-05	0.000127547	0.208413		1	1	1	K00759
E1	E3	100	100	70	161	70	161	15.426	14.247	0.114706	0.0246735	0.0631554	1		1	1	1	K00760
E1	E3	100	100	70	161	70	161	32.5875	27.064	0.267944	0.00362215	0.0124926	1		1	1	1	K00761
E1	E3	100	100	70	161	70	161	30.285	26.311	0.202937	0.00235083	0.00849606	1		1	1	1	K00762
E1	E3	100	100	70	161	70	161	24.132	18.659	0.371076	0.000252528	0.00116632	1		1	1	1	K00763
E1	E3	100	100	70	161	70	161	25.5315	24.291	0.0718564	0.230248	0.329388	1		1	1	1	K00764
E1	E3	100	100	70	161	70	161	20.9275	23.856	-0.188952	0.00641765	0.020753	1		1	1	1	K00765
E1	E3	100	100	70	161	70	161	30.1345	24.92	0.274112	0.00112147	0.004389	1		1	1	1	K00766
E1	E3	100	100	70	161	70	161	22.568	25.902	-0.198785	0.0238194	0.061536	1		1	1	1	K00767
E1	E3	100	100	70	161	70	161	40.1395	33.479	0.261766	0.0505081	0.109933	1		1	1	1	K00768
E1	E3	41.4286	44.0994	70	161	29	71	0.423	0.636	-0.588369	0.236051	0.334451	1	0.896599	0.773209	1	1	K00769
E1	E3	44.2857	60.8696	70	161	31	98	5.264	6.0065	-0.190365	0.0117378	0.0346921	1	0.510989	0.0217001	0.137723	1	K00772
E1	E3	100	100	70	161	70	161	18.576	17.332	0.100002	0.0435734	0.0985397	1		1	1	1	K00773
E1	E3	100	100	70	161	70	161	22.775	20.07	0.18241	0.188427	0.28948	1		1	1	1	K00782
E1	E3	100	100	70	161	70	161	23.1465	23.21	-0.00395246	0.352671	0.422685	1		1	1	1	K00783
E1	E3	100	100	70	161	70	161	34.8175	27.615	0.33436	0.000374557	0.00164956	1		1	1	1	K00784
E1	E3	57.1429	53.4161	70	161	40	86	10.4205	14.7025	-0.496637	0.469055	0.486024	1	1.16279	0.666935	1	1	K00786
E1	E3	100	100	70	161	70	161	30.182	25.628	0.235968	0.047254	0.104525	1		1	1	1	K00788
E1	E3	100	100	70	161	70	161	20.182	18.113	0.156044	0.0630557	0.130155	1		1	1	1	K00789
E1	E3	100	100	70	161	70	161	17.863	17.269	0.0487899	0.359057	0.426047	1		1	1	1	K00790
E1	E3	100	100	70	161	70	161	17.8815	17.254	0.0515369	0.298721	0.385294	1		1	1	1	K00791
E1	E3	100	100	70	161	70	161	28.712	26.014	0.142366	0.289495	0.377857	1		1	1	1	K00793
E1	E3	100	100	70	161	70	161	22.521	20.568	0.130869	0.0357126	0.0846738	1		1	1	1	K00794
E1	E3	42.8571	45.3416	70	161	30	73	1.7685	2.136	-0.272385	0.240247	0.337833	1	0.90411	0.774324	1	1	K00795
E1	E3	100	100	70	161	70	161	22.8805	22.772	0.00685757	0.405604	0.453638	1		1	1	1	K00796
E1	E3	100	100	70	161	70	161	35.3815	28.184	0.328119	0.000106531	0.000558216	1		1	1	1	K00797
E1	E3	98.5714	100	70	161	69	161	27.452	26.47	0.0525531	0.413096	0.457748	1	0	0.30303	0.899109	1	K00798
E1	E3	24.2857	36.0248	70	161	17	58	0.379	0.4465	-0.236462	0.0392948	0.090968	1	0.569616	0.0932606	0.416725	1	K00799
E1	E3	100	100	70	161	70	161	20.057	18.717	0.0997566	0.219966	0.319576	1		1	1	1	K00800
E1	E3	47.1429	71.4286	70	161	33	115	15.915	48.659	-1.61232	6.46524e-06	5.96446e-05	0.0790699	0.356757	0.000570587	0.007265	1	K00801
E1	E3	100	100	70	161	70	161	19.4285	12.706	0.612665	1.08769e-05	9.01822e-05	0.133025		1	1	1	K00805
E1	E3	100	100	70	161	70	161	21.027	19.474	0.110694	0.0931152	0.174877	1		1	1	1	K00806
E1	E3	22.8571	51.5528	70	161	16	83	2.7665	6.69	-1.27394	4.55753e-06	4.54638e-05	0.0557386	0.278447	4.68903e-05	0.00188892	0.573469	K00809
E1	E3	100	100	70	161	70	161	49.05	51.333	-0.0656334	0.221874	0.321533	1		1	1	1	K00812
E1	E3	50	49.6894	70	161	35	80	0.916	0.7135	0.360434	0.425448	0.464409	1	1.0125	1	1	1	K00813
E1	E3	100	100	70	161	70	161	26.0625	24.082	0.11402	0.199613	0.300797	1		1	1	1	K00817
E1	E3	100	100	70	161	70	161	19.009	23.923	-0.331716	0.00071421	0.00293016	1		1	1	1	K00818
E1	E3	91.4286	98.7578	70	161	64	159	32.5365	31.897	0.0286383	0.103308	0.188669	1	0.134172	0.0106313	0.0769355	1	K00819
E1	E3	100	100	70	161	70	161	20.491	18.122	0.177248	0.161409	0.259856	1		1	1	1	K00820
E1	E3	100	100	70	161	70	161	33.017	24.288	0.442965	4.52117e-06	4.52117e-05	0.0552939		1	1	1	K00821
E1	E3	24.2857	39.1304	70	161	17	63	0.425	0.449	-0.0792526	0.0189062	0.05102	1	0.498952	0.0350867	0.202411	1	K00823
E1	E3	44.2857	26.087	70	161	31	42	2.071	1.653	0.325241	0.0016366	0.00612636	1	2.25214	0.00864148	0.0642464	1	K00824
E1	E3	100	100	70	161	70	161	30.3785	26.601	0.19157	0.00602285	0.0196268	1		1	1	1	K00826
E1	E3	100	100	70	161	70	161	27.803	25.789	0.108485	0.0131919	0.038141	1		1	1	1	K00831
E1	E3	54.2857	55.9006	70	161	38	90	0.983	0.662	0.57036	0.429643	0.466592	1	0.936806	0.885733	1	1	K00832
E1	E3	100	100	70	161	70	161	18.4875	17.118	0.111036	0.294276	0.381775	1		1	1	1	K00833
E1	E3	75.7143	89.441	70	161	53	144	4.235	19.6535	-2.21435	6.03339e-08	1.75269e-06	0.000737883	0.368056	0.00895309	0.0662009	1	K00835
E1	E3	85.7143	90.0621	70	161	60	145	3.95	4.996	-0.338921	0.0390128	0.0905283	1	0.662069	0.367813	1	1	K00836
E1	E3	28.5714	42.8571	70	161	20	69	0.7835	1.022	-0.38339	0.0121266	0.0356169	1	0.533333	0.0553734	0.285384	1	K00840
E1	E3	54.2857	52.795	70	161	38	85	0.2365	0.215	0.137504	0.318674	0.399709	1	1.06176	0.886368	1	1	K00841
E1	E3	97.1429	100	70	161	68	161	21.841	17.113	0.351946	0.0483195	0.10619	1	0	0.0909091	0.408906	1	K00844
E1	E3	100	100	70	161	70	161	29.144	29.192	-0.00237416	0.279683	0.370267	1		1	1	1	K00845
E1	E3	100	100	70	161	70	161	47.81	37.177	0.362902	0.000196701	0.00093934	1		1	1	1	K00847
E1	E3	100	100	70	161	70	161	30.929	24.126	0.358371	0.0010143	0.00401061	1		1	1	1	K00848
E1	E3	100	100	70	161	70	161	30.6495	24.688	0.312054	0.000763337	0.00311291	1		1	1	1	K00849
E1	E3	100	100	70	161	70	161	51.921	47.802	0.119247	0.0931153	0.174877	1		1	1	1	K00850
E1	E3	88.5714	94.4099	70	161	62	152	1.8395	2.09	-0.184189	0.38947	0.443674	1	0.458882	0.167632	0.628686	1	K00851
E1	E3	100	100	70	161	70	161	10.354	10.213	0.0197815	0.231226	0.330515	1		1	1	1	K00852
E1	E3	92.8571	97.5155	70	161	65	157	3.772	4.544	-0.268633	0.00269328	0.00958359	1	0.33121	0.134399	0.533321	1	K00853
E1	E3	100	100	70	161	70	161	28.612	21.476	0.413895	7.57195e-05	0.000418107	0.92605		1	1	1	K00854
E1	E3	32.8571	45.9627	70	161	23	74	1.123	1.26	-0.166066	0.0282708	0.0704897	1	0.575331	0.081498	0.378406	1	K00855
E1	E3	100	100	70	161	70	161	15.116	14.094	0.100995	0.0693906	0.139741	1		1	1	1	K00857
E1	E3	100	100	70	161	70	161	24.858	24.108	0.0441983	0.426493	0.464748	1		1	1	1	K00858
E1	E3	100	100	70	161	70	161	16.6125	14.599	0.1864	0.00546265	0.0179882	1		1	1	1	K00859
E1	E3	100	100	70	161	70	161	17.1835	16.41	0.0664487	0.23286	0.331611	1		1	1	1	K00860
E1	E3	100	100	70	161	70	161	21.083	15.641	0.430747	0.000164326	0.000802597	1		1	1	1	K00864
E1	E3	100	100	70	161	70	161	16.9965	11.23	0.59788	1.53718e-05	0.000118163	0.187997		1	1	1	K00865
E1	E3	71.4286	70.1863	70	161	50	113	0.5925	0.569	0.0583865	0.49697	0.499045	1	1.06195	0.876639	1	1	K00867
E1	E3	100	100	70	161	70	161	14.5485	12.433	0.226696	0.0320103	0.0778301	1		1	1	1	K00868
E1	E3	48.5714	57.1429	70	161	34	92	0.7985	2.215	-1.47194	0.00593165	0.0193725	1	0.708333	0.251864	0.802226	1	K00869
E1	E3	78.5714	77.0186	70	161	55	124	26.993	31.063	-0.202612	0.31086	0.394514	1	1.09409	0.864982	1	1	K00870
E1	E3	100	100	70	161	70	161	13.3205	10.69	0.317386	0.00373991	0.0128625	1		1	1	1	K00872
E1	E3	100	100	70	161	70	161	30.609	30.253	0.0168777	0.24213	0.339476	1		1	1	1	K00873
E1	E3	100	100	70	161	70	161	33.8805	26.811	0.33763	0.000153843	0.000762051	1		1	1	1	K00874
E1	E3	100	100	70	161	70	161	38.001	32.241	0.237141	0.00149781	0.00566602	1		1	1	1	K00876
E1	E3	100	100	70	161	70	161	17.378	15.837	0.133963	0.0392109	0.0908766	1		1	1	1	K00878
E1	E3	95.7143	98.1366	70	161	67	158	8.791	26.099	-1.5699	2.99323e-07	5.80203e-06	0.00366073	0.424051	0.370696	1	1	K00879
E1	E3	45.7143	57.764	70	161	32	93	1.63	1.548	0.0744665	0.0801253	0.156189	1	0.615733	0.113929	0.47587	1	K00880
E1	E3	100	100	70	161	70	161	26.24	19.786	0.407288	0.000168426	0.00082033	1		1	1	1	K00882
E1	E3	90	75.7764	70	161	63	122	3.424	1.935	0.823349	9.93583e-06	8.39773e-05	0.121515	2.87705	0.0123247	0.0871782	1	K00883
E1	E3	40	47.205	70	161	28	76	0.8895	0.906	-0.0265164	0.164829	0.263768	1	0.745614	0.318795	0.918677	1	K00884
E1	E3	38.5714	44.7205	70	161	27	72	2.354	1.917	0.296264	0.207609	0.308549	1	0.776163	0.469672	1	1	K00885
E1	E3	87.1429	85.0932	70	161	61	137	9.483	8.659	0.131143	0.298826	0.385379	1	1.18735	0.838347	1	1	K00886
E1	E3	32.8571	28.5714	70	161	23	46	0.289	0.3925	-0.441623	0.264357	0.357801	1	1.2234	0.534022	1	1	K00887
E1	E3	100	100	70	161	70	161	22.4775	18.758	0.260976	0.00632163	0.020475	1		1	1	1	K00891
E1	E3	31.4286	45.3416	70	161	22	73	0.753	0.873	-0.213332	0.0179733	0.048978	1	0.552511	0.0586002	0.29566	1	K00892
E1	E3	98.5714	100	70	161	69	161	39.274	30.786	0.3513	0.000479325	0.00205114	1	0	0.30303	0.899109	1	K00895
E1	E3	42.8571	41.6149	70	161	30	67	8.43	7.137	0.240215	0.397318	0.4481	1	1.05224	0.885381	1	1	K00897
E1	E3	95.7143	97.5155	70	161	67	157	4.366	4.258	0.0361362	0.231222	0.330515	1	0.569002	0.435615	1	1	K00901
E1	E3	25.7143	41.6149	70	161	18	67	0.768	0.724	0.0851166	0.0136311	0.0391887	1	0.485649	0.0258061	0.15964	1	K00906
E1	E3	100	100	70	161	70	161	33.3945	37.866	-0.181293	0.0357127	0.0846738	1		1	1	1	K00912
E1	E3	100	99.3789	70	161	70	160	10.405	7.0115	0.569482	0.000185803	0.000895337	1	inf	1	1	1	K00917
E1	E3	100	100	70	161	70	161	27.6595	22.658	0.287755	0.00661356	0.0212908	1		1	1	1	K00919
E1	E3	100	100	70	161	70	161	19.165	17.304	0.147368	0.0226423	0.0590565	1		1	1	1	K00925
E1	E3	100	100	70	161	70	161	10.8595	8.065	0.429211	3.24347e-05	0.000209549	0.396676		1	1	1	K00926
E1	E3	100	100	70	161	70	161	23.4785	22.726	0.0469965	0.361462	0.427491	1		1	1	1	K00927
E1	E3	100	100	70	161	70	161	25.3435	21.478	0.238756	0.00177446	0.00659022	1		1	1	1	K00928
E1	E3	98.5714	100	70	161	69	161	59.953	54.048	0.149591	0.192796	0.293928	1	0	0.30303	0.899109	1	K00929
E1	E3	100	100	70	161	70	161	29.8355	27.36	0.124962	0.0544091	0.116312	1		1	1	1	K00930
E1	E3	100	100	70	161	70	161	23.591	21.139	0.158329	0.0507311	0.110301	1		1	1	1	K00931
E1	E3	97.1429	99.3789	70	161	68	160	3.287	2.9375	0.162183	0.280765	0.371234	1	0.2125	0.218738	0.741708	1	K00936
E1	E3	100	100	70	161	70	161	39.111	34.39	0.185585	0.0745308	0.147565	1		1	1	1	K00937
E1	E3	60	50.9317	70	161	42	82	0.5885	0.6875	-0.224317	0.0879753	0.168194	1	1.44512	0.25083	0.801906	1	K00938
E1	E3	100	100	70	161	70	161	22.9755	22.439	0.0340879	0.0835169	0.161663	1		1	1	1	K00939
E1	E3	100	100	70	161	70	161	5.2635	6.601	-0.326662	0.00158898	0.00596844	1		1	1	1	K00940
E1	E3	100	100	70	161	70	161	23.754	18.068	0.394734	3.88287e-05	0.000241535	0.474875		1	1	1	K00941
E1	E3	100	100	70	161	70	161	16.2075	15.377	0.0758875	0.191333	0.292499	1		1	1	1	K00942
E1	E3	100	100	70	161	70	161	9.039	9.636	-0.0922712	0.0284209	0.0708063	1		1	1	1	K00943
E1	E3	100	100	70	161	70	161	23.315	20.212	0.206046	0.102928	0.188295	1		1	1	1	K00945
E1	E3	100	100	70	161	70	161	34.9595	39.293	-0.168588	0.0121406	0.0356407	1		1	1	1	K00946
E1	E3	100	100	70	161	70	161	18.8345	15.472	0.283718	0.00133902	0.0051449	1		1	1	1	K00948
E1	E3	100	100	70	161	70	161	20.284	15.64	0.375102	0.000537255	0.00226495	1		1	1	1	K00949
E1	E3	100	100	70	161	70	161	15.546	13.188	0.237318	0.196631	0.297953	1		1	1	1	K00950
E1	E3	100	100	70	161	70	161	22.994	20.52	0.164227	0.0502857	0.109605	1		1	1	1	K00951
E1	E3	25.7143	49.6894	70	161	18	80	8.5285	21.9835	-1.36606	1.79726e-05	0.000132893	0.219805	0.350481	0.000814796	0.00941868	1	K00952
E1	E3	100	100	70	161	70	161	16.844	14.657	0.200645	0.0169201	0.0466907	1		1	1	1	K00954
E1	E3	40	52.1739	70	161	28	84	22.8145	59.417	-1.38092	0.00615988	0.02002	1	0.611111	0.11485	0.478247	1	K00955
E1	E3	100	100	70	161	70	161	57.339	46.033	0.316848	0.00382441	0.0131236	1		1	1	1	K00956
E1	E3	100	100	70	161	70	161	39.2515	34.649	0.179934	0.050843	0.110485	1		1	1	1	K00957
E1	E3	100	100	70	161	70	161	24.0565	22.137	0.119967	0.0490766	0.107583	1		1	1	1	K00962
E1	E3	100	100	70	161	70	161	10.4045	11.445	-0.13751	0.0929368	0.174703	1		1	1	1	K00963
E1	E3	100	100	70	161	70	161	16.9235	11.992	0.496956	0.000231215	0.00107889	1		1	1	1	K00965
E1	E3	88.5714	96.8944	70	161	62	156	9.223	20.595	-1.15899	3.62495e-05	0.000229467	0.443331	0.248397	0.0244008	0.152295	1	K00966
E1	E3	42.8571	62.7329	70	161	30	101	43.115	89.301	-1.05049	8.45114e-05	0.000460389	1	0.445545	0.00608114	0.0477664	1	K00968
E1	E3	100	100	70	161	70	161	21.792	19.431	0.165438	0.14865	0.245509	1		1	1	1	K00969
E1	E3	100	100	70	161	70	161	10.2005	14.119	-0.468998	0.00156165	0.00587299	1		1	1	1	K00970
E1	E3	100	100	70	161	70	161	55.325	62.564	-0.177401	0.186122	0.287121	1		1	1	1	K00971
E1	E3	100	98.7578	70	161	70	159	65.6455	45.431	0.531019	0.00645641	0.0208508	1	inf	1	1	1	K00972
E1	E3	100	100	70	161	70	161	23.772	21.303	0.158207	0.0199126	0.0531495	1		1	1	1	K00973
E1	E3	100	100	70	161	70	161	20.3975	15.337	0.411376	0.000395469	0.00173354	1		1	1	1	K00974
E1	E3	100	100	70	161	70	161	39.8045	29.014	0.456182	2.27212e-05	0.000158607	0.27788		1	1	1	K00975
E1	E3	100	98.7578	70	161	70	159	12.519	9.545	0.391302	0.0357967	0.0847494	1	inf	1	1	1	K00978
E1	E3	100	100	70	161	70	161	21.275	26.747	-0.330218	0.000553761	0.00232652	1		1	1	1	K00979
E1	E3	100	100	70	161	70	161	2.0305	2.394	-0.237588	0.0311733	0.0762804	1		1	1	1	K00980
E1	E3	100	100	70	161	70	161	19.3295	15.631	0.306394	0.000466666	0.00200468	1		1	1	1	K00981
E1	E3	90	94.4099	70	161	63	152	7.884	5.8745	0.424462	0.303167	0.388507	1	0.532895	0.261701	0.826816	1	K00982
E1	E3	82.8571	77.6398	70	161	58	125	36.2485	25.05	0.533111	0.0311116	0.0761598	1	1.392	0.480502	1	1	K00983
E1	E3	100	100	70	161	70	161	40.7315	55.317	-0.441578	0.00745107	0.0235038	1		1	1	1	K00986
E1	E3	98.5714	98.7578	70	161	69	159	4.028	7.826	-0.958211	0.000450843	0.00194722	1	0.867925	1	1	1	K00989
E1	E3	85.7143	90.0621	70	161	60	145	9.054	8.277	0.129447	0.398075	0.448499	1	0.662069	0.367813	1	1	K00990
E1	E3	100	100	70	161	70	161	28.0775	26.765	0.0690668	0.383343	0.439927	1		1	1	1	K00991
E1	E3	100	100	70	161	70	161	21.259	19.612	0.116337	0.0534704	0.114767	1		1	1	1	K00995
E1	E3	100	100	70	161	70	161	6.258	5.37	0.22078	0.151146	0.248491	1		1	1	1	K00997
E1	E3	38.5714	49.6894	70	161	27	80	2.887	1.2755	1.17851	0.212758	0.313195	1	0.635756	0.150964	0.578048	1	K00998
E1	E3	100	100	70	161	70	161	25.267	21.243	0.250267	0.0163877	0.0455189	1		1	1	1	K01000
E1	E3	64.2857	79.5031	70	161	45	128	7.84	5.949	0.398206	0.0926123	0.174254	1	0.464062	0.0202864	0.130649	1	K01002
E1	E3	100	100	70	161	70	161	32.6945	33.167	-0.0207006	0.428174	0.465637	1		1	1	1	K01006
E1	E3	85.7143	90.0621	70	161	60	145	0.7875	1.343	-0.770107	0.0363744	0.0857643	1	0.662069	0.367813	1	1	K01007
E1	E3	100	100	70	161	70	161	23.1825	15.315	0.598091	1.92496e-07	4.2115e-06	0.00235423		1	1	1	K01008
E1	E3	62.8571	72.6708	70	161	44	117	0.448	0.687	-0.616811	0.00143079	0.00544617	1	0.636423	0.161189	0.608438	1	K01011
E1	E3	100	100	70	161	70	161	19.936	16.208	0.29867	0.0273916	0.06876	1		1	1	1	K01012
E1	E3	21.4286	28.5714	70	161	15	46	0.852	0.9875	-0.212927	0.116632	0.206817	1	0.681818	0.329951	0.936482	1	K01023
E1	E3	100	100	70	161	70	161	20.384	16.326	0.320266	0.0232246	0.0602247	1		1	1	1	K01026
E1	E3	98.5714	99.3789	70	161	69	160	9.396	12.0075	-0.353817	0.0180294	0.0490872	1	0.43125	0.515152	1	1	K01034
E1	E3	100	100	70	161	70	161	10.6985	11.513	-0.105855	0.262999	0.356779	1		1	1	1	K01035
E1	E3	41.4286	33.5404	70	161	29	54	2.88	2.1235	0.439625	0.0818913	0.15915	1	1.40154	0.29653	0.899109	1	K01039
E1	E3	100	100	70	161	70	161	13.128	13.569	-0.0476673	0.468837	0.486024	1		1	1	1	K01040
E1	E3	64.2857	72.0497	70	161	45	116	0.751	2.0605	-1.45611	0.000558745	0.00234585	1	0.698276	0.276015	0.859618	1	K01042
E1	E3	78.5714	88.8199	70	161	55	143	15.172	20.249	-0.416439	0.0339419	0.0813621	1	0.461538	0.0637274	0.316824	1	K01046
E1	E3	100	100	70	161	70	161	28.754	19.492	0.560881	0.000363073	0.00160302	1		1	1	1	K01048
E1	E3	100	100	70	161	70	161	25.0885	19.044	0.39769	0.00366886	0.0126377	1		1	1	1	K01051
E1	E3	100	100	70	161	70	161	23.421	21.384	0.131271	0.0385793	0.0897704	1		1	1	1	K01056
E1	E3	100	99.3789	70	161	70	160	33.67	27.999	0.266088	0.120414	0.211447	1	inf	1	1	1	K01057
E1	E3	95.7143	100	70	161	67	161	9.375	10.656	-0.184775	0.0181723	0.0494212	1	0	0.0269948	0.165404	1	K01058
E1	E3	35.7143	51.5528	70	161	25	83	0.677	0.696	-0.0399315	0.0139647	0.0399392	1	0.522088	0.0314973	0.18502	1	K01061
E1	E3	75.7143	75.7764	70	161	53	122	2.812	1.5085	0.898482	0.129781	0.223962	1	0.996625	1	1	1	K01066
E1	E3	45.7143	50.9317	70	161	32	82	0.647	0.648	-0.0022281	0.281371	0.37143	1	0.811297	0.477954	1	1	K01069
E1	E3	45.7143	50.9317	70	161	32	82	0.722	0.974	-0.431923	0.132168	0.226737	1	0.811297	0.477954	1	1	K01070
E1	E3	35.7143	46.5839	70	161	25	75	0.652	0.693	-0.0879834	0.0499399	0.109026	1	0.637037	0.148954	0.573044	1	K01071
E1	E3	100	100	70	161	70	161	37.668	38.345	-0.025699	0.463727	0.4837	1		1	1	1	K01077
E1	E3	100	100	70	161	70	161	6.3325	7.376	-0.220063	0.0144382	0.0410077	1		1	1	1	K01079
E1	E3	100	100	70	161	70	161	18.383	21.721	-0.240718	0.0315515	0.0770057	1		1	1	1	K01081
E1	E3	100	100	70	161	70	161	23.608	24.136	-0.0319108	0.369113	0.431244	1		1	1	1	K01082
E1	E3	47.1429	54.6584	70	161	33	88	0.818	1.006	-0.298458	0.109885	0.197544	1	0.739865	0.317839	0.918395	1	K01085
E1	E3	28.5714	47.8261	70	161	20	77	0.8495	1.042	-0.294669	0.00475166	0.0159039	1	0.436364	0.00877487	0.065001	1	K01087
E1	E3	100	100	70	161	70	161	16.006	14.064	0.186606	0.0739291	0.146635	1		1	1	1	K01089
E1	E3	100	100	70	161	70	161	12.3125	7.806	0.657468	0.0104008	0.0313769	1		1	1	1	K01090
E1	E3	100	100	70	161	70	161	36.6695	32.986	0.152727	0.155966	0.253619	1		1	1	1	K01091
E1	E3	100	100	70	161	70	161	15.2855	15.421	-0.0127326	0.122141	0.213855	1		1	1	1	K01092
E1	E3	25.7143	40.3727	70	161	18	65	2.5985	2.027	0.358333	0.0156861	0.0439498	1	0.511243	0.0371067	0.211175	1	K01093
E1	E3	97.1429	100	70	161	68	161	4.108	3.288	0.321226	0.127873	0.221388	1	0	0.0909091	0.408906	1	K01095
E1	E3	41.4286	49.0683	70	161	29	79	0.965	0.85	0.183066	0.191639	0.292895	1	0.734177	0.316816	0.918173	1	K01096
E1	E3	100	100	70	161	70	161	22.267	18.563	0.262477	0.0014065	0.00536372	1		1	1	1	K01104
E1	E3	94.2857	93.1677	70	161	66	150	1.1305	0.773	0.548421	0.00154334	0.00581127	1	1.21	1	1	1	K01118
E1	E3	100	100	70	161	70	161	10.42	8.081	0.36675	0.000272393	0.00124677	1		1	1	1	K01119
E1	E3	100	100	70	161	70	161	14.7545	12.945	0.18876	0.0629232	0.129904	1		1	1	1	K01126
E1	E3	100	100	70	161	70	161	24.035	20.945	0.198531	0.0408737	0.0938575	1		1	1	1	K01129
E1	E3	98.5714	100	70	161	69	161	30.149	38.095	-0.337492	0.0289123	0.0717381	1	0	0.30303	0.899109	1	K01130
E1	E3	97.1429	100	70	161	68	161	133.337	121.054	0.139426	0.350287	0.421364	1	0	0.0909091	0.408906	1	K01133
E1	E3	28.5714	43.4783	70	161	20	70	1.652	2.2155	-0.423419	0.0212263	0.0559477	1	0.52	0.039784	0.222173	1	K01138
E1	E3	50	50.3106	70	161	35	81	1.026	0.869	0.239603	0.453551	0.479083	1	0.987654	1	1	1	K01139
E1	E3	40	50.3106	70	161	28	81	0.8675	0.564	0.621169	0.119518	0.210832	1	0.658436	0.155092	0.589245	1	K01141
E1	E3	100	100	70	161	70	161	15.5945	15.227	0.0344056	0.205658	0.306769	1		1	1	1	K01142
E1	E3	88.5714	98.1366	70	161	62	158	48.791	55.7765	-0.193042	0.0721354	0.143681	1	0.147152	0.00373767	0.0315471	1	K01144
E1	E3	22.8571	45.9627	70	161	16	74	2.0965	1.0555	0.990056	0.00160591	0.00602093	1	0.348348	0.00115331	0.0123293	1	K01146
E1	E3	28.5714	33.5404	70	161	20	54	0.471	0.475	-0.0122005	0.228166	0.32783	1	0.792593	0.539969	1	1	K01147
E1	E3	32.8571	42.236	70	161	23	68	0.417	0.661	-0.664603	0.0574075	0.121093	1	0.669274	0.190789	0.687898	1	K01150
E1	E3	100	100	70	161	70	161	30.8165	29.244	0.0755624	0.33924	0.414056	1		1	1	1	K01151
E1	E3	100	100	70	161	70	161	16.488	17.297	-0.0691054	0.273946	0.36576	1		1	1	1	K01153
E1	E3	100	100	70	161	70	161	5.54	6.216	-0.166101	0.0471485	0.104348	1		1	1	1	K01154
E1	E3	98.5714	98.7578	70	161	69	159	6.996	7.326	-0.0664954	0.467985	0.485614	1	0.867925	1	1	1	K01155
E1	E3	100	100	70	161	70	161	9.928	11.926	-0.264535	0.0204878	0.0544286	1		1	1	1	K01156
E1	E3	100	100	70	161	70	161	11.8765	14.325	-0.270425	0.00277509	0.00984319	1		1	1	1	K01159
E1	E3	27.1429	43.4783	70	161	19	70	0.427	0.548	-0.35994	0.00885374	0.02733	1	0.484314	0.0194505	0.126474	1	K01160
E1	E3	100	100	70	161	70	161	44.211	40.08	0.141523	0.120414	0.211447	1		1	1	1	K01163
E1	E3	25.7143	39.7516	70	161	18	64	1.692	2.146	-0.342921	0.0148065	0.0418885	1	0.524639	0.0514665	0.27166	1	K01169
E1	E3	21.4286	50.9317	70	161	15	82	8.605	21.167	-1.29857	1.83549e-06	2.16956e-05	0.0224481	0.262749	2.42851e-05	0.00144178	0.297006	K01170
E1	E3	97.1429	100	70	161	68	161	19.0335	17.576	0.114934	0.444626	0.474329	1	0	0.0909091	0.408906	1	K01173
E1	E3	41.4286	50.3106	70	161	29	81	1.849	1.234	0.583403	0.267478	0.360271	1	0.698585	0.252021	0.802226	1	K01175
E1	E3	100	100	70	161	70	161	11.2335	13.998	-0.317413	0.0416308	0.0951317	1		1	1	1	K01176
E1	E3	100	100	70	161	70	161	27.365	32.65	-0.254751	0.0457942	0.102276	1		1	1	1	K01179
E1	E3	64.2857	49.0683	70	161	45	79	13.117	6.768	0.954636	0.000297871	0.00135225	1	1.86835	0.0440853	0.242103	1	K01181
E1	E3	100	100	70	161	70	161	38.142	26.181	0.54286	4.87098e-06	4.78106e-05	0.0595721		1	1	1	K01182
E1	E3	97.1429	98.7578	70	161	68	159	30.272	23.368	0.37345	0.0551211	0.117466	1	0.427673	0.586581	1	1	K01183
E1	E3	40	56.5217	70	161	28	91	0.1135	0.134	-0.239541	0.00947523	0.0289199	1	0.512821	0.0226433	0.142746	1	K01185
E1	E3	98.5714	100	70	161	69	161	15.499	21.374	-0.463682	0.00305172	0.0107156	1	0	0.30303	0.899109	1	K01186
E1	E3	100	100	70	161	70	161	41.1625	33.404	0.30131	0.00133902	0.0051449	1		1	1	1	K01187
E1	E3	100	100	70	161	70	161	62.2015	53.567	0.215605	0.0393929	0.0910901	1		1	1	1	K01190
E1	E3	98.5714	99.3789	70	161	69	160	7.348	5.497	0.418707	0.0129397	0.0375362	1	0.43125	0.515152	1	1	K01191
E1	E3	100	100	70	161	70	161	42.6585	34.525	0.305192	0.00611487	0.0198843	1		1	1	1	K01192
E1	E3	100	100	70	161	70	161	39.1825	27.044	0.534901	1.01235e-05	8.52104e-05	0.123811		1	1	1	K01193
E1	E3	75.7143	85.0932	70	161	53	137	1.659	1.752	-0.0786889	0.00739899	0.0233461	1	0.546157	0.0943823	0.420968	1	K01194
E1	E3	100	100	70	161	70	161	34.593	26.733	0.371858	0.000903361	0.00361285	1		1	1	1	K01195
E1	E3	100	100	70	161	70	161	32.8925	34.68	-0.0763452	0.191917	0.293087	1		1	1	1	K01197
E1	E3	100	100	70	161	70	161	33.3005	23.092	0.528151	0.00041746	0.00181692	1		1	1	1	K01198
E1	E3	100	100	70	161	70	161	27.044	20.701	0.385608	0.00128355	0.00494731	1		1	1	1	K01200
E1	E3	97.1429	99.3789	70	161	68	160	51.222	49.622	0.0457837	0.419364	0.461142	1	0.2125	0.218738	0.741708	1	K01201
E1	E3	97.1429	96.8944	70	161	68	156	29.3775	23.361	0.33061	0.0205395	0.0545053	1	1.08974	1	1	1	K01205
E1	E3	100	100	70	161	70	161	57.0685	56.108	0.0244882	0.430697	0.466846	1		1	1	1	K01206
E1	E3	100	100	70	161	70	161	13.952	14.354	-0.0409809	0.394843	0.446288	1		1	1	1	K01207
E1	E3	100	100	70	161	70	161	39.805	28.082	0.503304	0.000184294	0.000889119	1		1	1	1	K01209
E1	E3	95.7143	98.7578	70	161	67	159	56.344	47.892	0.234477	0.139416	0.235439	1	0.280922	0.164797	0.619761	1	K01212
E1	E3	98.5714	96.2733	70	161	69	155	14.354	7.43	0.950019	0.000629182	0.00261375	1	2.67097	0.678161	1	1	K01215
E1	E3	47.1429	54.6584	70	161	33	88	13.586	13.471	0.0122638	0.122979	0.215025	1	0.739865	0.317839	0.918395	1	K01216
E1	E3	98.5714	100	70	161	69	161	12.263	15.997	-0.383489	0.135415	0.230434	1	0	0.30303	0.899109	1	K01218
E1	E3	38.5714	47.8261	70	161	27	77	0.363	0.349	0.0567425	0.20545	0.306571	1	0.684989	0.199652	0.706116	1	K01220
E1	E3	92.8571	97.5155	70	161	65	157	2.592	2.459	0.075994	0.212424	0.312954	1	0.33121	0.134399	0.533321	1	K01222
E1	E3	100	100	70	161	70	161	8.2555	5.89	0.487088	9.16783e-07	1.27702e-05	0.0112123		1	1	1	K01223
E1	E3	100	98.7578	70	161	70	159	22.297	13.291	0.7464	0.000225699	0.00105718	1	inf	1	1	1	K01224
E1	E3	81.4286	78.2609	70	161	57	126	0.656	0.639	0.0378799	0.435466	0.468939	1	1.21795	0.724451	1	1	K01226
E1	E3	100	100	70	161	70	161	8.1475	6.3	0.371006	0.0309484	0.075882	1		1	1	1	K01232
E1	E3	92.8571	89.441	70	161	65	144	8.695	6.639	0.38922	0.0314946	0.0768821	1	1.53472	0.475642	1	1	K01235
E1	E3	97.1429	96.8944	70	161	68	156	2.3385	2.2405	0.0617627	0.212428	0.312954	1	1.08974	1	1	1	K01239
E1	E3	88.5714	96.2733	70	161	62	155	4.335	5.342	-0.301348	0.00476406	0.015941	1	0.3	0.0344394	0.199712	1	K01241
E1	E3	100	100	70	161	70	161	34.1275	28.243	0.273041	0.000110188	0.000574667	1		1	1	1	K01243
E1	E3	100	100	70	161	70	161	4.6935	5.591	-0.252442	0.00778839	0.0244361	1		1	1	1	K01246
E1	E3	100	99.3789	70	161	70	160	12.6175	12.1625	0.0529863	0.226039	0.325728	1	inf	1	1	1	K01247
E1	E3	78.5714	85.7143	70	161	55	138	2.493	2.5525	-0.0340281	0.146627	0.243361	1	0.611111	0.182257	0.665571	1	K01250
E1	E3	100	100	70	161	70	161	9.388	15.079	-0.683651	1.47302e-06	1.83265e-05	0.018015		1	1	1	K01251
E1	E3	32.8571	37.2671	70	161	23	60	0.644	1.1725	-0.864455	0.146725	0.243381	1	0.823759	0.553601	1	1	K01252
E1	E3	41.4286	53.4161	70	161	29	86	0.617	0.4355	0.502598	0.145044	0.241789	1	0.616846	0.115302	0.479712	1	K01255
E1	E3	98.5714	100	70	161	69	161	8.045	7.493	0.102549	0.336499	0.412067	1	0	0.30303	0.899109	1	K01256
E1	E3	100	100	70	161	70	161	22.6045	21.248	0.089283	0.227653	0.327398	1		1	1	1	K01258
E1	E3	37.1429	37.2671	70	161	26	60	1.105	0.905	0.288057	0.345476	0.418417	1	0.994697	1	1	1	K01261
E1	E3	100	100	70	161	70	161	32.5205	29.386	0.14622	0.113266	0.202255	1		1	1	1	K01262
E1	E3	100	100	70	161	70	161	37.622	33.422	0.170778	0.0947311	0.17715	1		1	1	1	K01265
E1	E3	98.5714	99.3789	70	161	69	160	50.709	40.6135	0.320282	0.00417969	0.014227	1	0.43125	0.515152	1	1	K01266
E1	E3	100	100	70	161	70	161	41.193	27.502	0.582863	2.93563e-05	0.000193546	0.359027		1	1	1	K01267
E1	E3	100	100	70	161	70	161	36.6255	33.319	0.136503	0.228948	0.328261	1		1	1	1	K01270
E1	E3	100	100	70	161	70	161	3.9985	4.877	-0.286535	0.0139737	0.0399482	1		1	1	1	K01271
E1	E3	100	100	70	161	70	161	39.2915	26.964	0.543183	0.00669339	0.0214858	1		1	1	1	K01273
E1	E3	97.1429	100	70	161	68	161	37.308	46.212	-0.308783	0.00172039	0.00640695	1	0	0.0909091	0.408906	1	K01277
E1	E3	98.5714	100	70	161	69	161	53.73	50.79	0.0811834	0.264399	0.357817	1	0	0.30303	0.899109	1	K01278
E1	E3	67.1429	63.9752	70	161	47	103	0.801	0.63	0.34645	0.181708	0.282446	1	1.1507	0.764297	1	1	K01281
E1	E3	100	100	70	161	70	161	20.2455	21.037	-0.0553277	0.0169201	0.0466907	1		1	1	1	K01284
E1	E3	98.5714	100	70	161	69	161	25.026	19.177	0.384051	0.00714788	0.0227179	1	0	0.30303	0.899109	1	K01286
E1	E3	100	97.5155	70	161	70	157	11.1385	7.295	0.610575	6.3114e-09	2.61656e-07	7.71884e-05	inf	0.317468	0.918173	1	K01295
E1	E3	95.7143	98.7578	70	161	67	159	5.316	5.414	-0.0263538	0.0582938	0.122499	1	0.280922	0.164797	0.619761	1	K01297
E1	E3	98.5714	99.3789	70	161	69	160	13.414	8.4845	0.660838	0.000122391	0.000628131	1	0.43125	0.515152	1	1	K01299
E1	E3	100	96.2733	70	161	70	155	4.3545	2.279	0.934106	0.00155062	0.00583333	1	inf	0.181643	0.663528	1	K01304
E1	E3	100	100	70	161	70	161	48.645	31.056	0.64742	4.19074e-07	7.33229e-06	0.00512527		1	1	1	K01305
E1	E3	97.1429	99.3789	70	161	68	160	38.178	35.453	0.106834	0.345536	0.418419	1	0.2125	0.218738	0.741708	1	K01308
E1	E3	85.7143	99.3789	70	161	60	160	26.6755	32.826	-0.299324	0.000216628	0.00102134	1	0.0375	3.35887e-05	0.00164637	0.41079	K01322
E1	E3	100	100	70	161	70	161	33.1805	24.334	0.447362	0.000139288	0.000700737	1		1	1	1	K01338
E1	E3	91.4286	93.7888	70	161	64	151	7.148	6.691	0.0953178	0.438275	0.470526	1	0.706402	0.57524	1	1	K01354
E1	E3	21.4286	36.0248	70	161	15	58	1.089	2.7505	-1.33669	0.00557184	0.0183083	1	0.484326	0.0314638	0.184912	1	K01355
E1	E3	100	100	70	161	70	161	23.1885	18.741	0.307212	0.000433857	0.00188092	1		1	1	1	K01356
E1	E3	100	100	70	161	70	161	10.158	9.324	0.123595	0.130581	0.224804	1		1	1	1	K01358
E1	E3	100	100	70	161	70	161	8.1685	8.164	0.000794995	0.373567	0.433949	1		1	1	1	K01372
E1	E3	34.2857	45.3416	70	161	24	73	0.502	0.775	-0.626509	0.0367411	0.0864288	1	0.628946	0.146871	0.568068	1	K01407
E1	E3	100	100	70	161	70	161	22.1355	21.775	0.0236892	0.169128	0.268662	1		1	1	1	K01409
E1	E3	78.5714	89.441	70	161	55	144	3.806	13.583	-1.83545	1.90013e-07	4.18926e-06	0.00232386	0.43287	0.0375388	0.213336	1	K01414
E1	E3	60	58.3851	70	161	42	94	0.464	0.441	0.0733461	0.342212	0.41607	1	1.06915	0.884703	1	1	K01419
E1	E3	100	100	70	161	70	161	39.608	32.11	0.302769	0.000246541	0.00114169	1		1	1	1	K01420
E1	E3	100	100	70	161	70	161	22.359	17.942	0.317515	0.00194604	0.0071687	1		1	1	1	K01421
E1	E3	100	100	70	161	70	161	23.7595	21.97	0.11297	0.133329	0.227961	1		1	1	1	K01424
E1	E3	100	100	70	161	70	161	21.789	27.443	-0.332838	0.00244692	0.00879914	1		1	1	1	K01425
E1	E3	74.2857	75.1553	70	161	52	121	1.5335	1.328	0.207573	0.40989	0.456367	1	0.955005	0.87058	1	1	K01426
E1	E3	100	100	70	161	70	161	6.5045	6.575	-0.0155527	0.233187	0.331903	1		1	1	1	K01428
E1	E3	94.2857	100	70	161	66	161	3.9335	4.258	-0.114362	0.146426	0.243149	1	0	0.00793269	0.0600352	1	K01429
E1	E3	80	85.7143	70	161	56	138	2.595	3.089	-0.251405	0.0362669	0.0855768	1	0.666667	0.32922	0.935855	1	K01430
E1	E3	100	100	70	161	70	161	14.2595	13.244	0.106584	0.354263	0.423325	1		1	1	1	K01433
E1	E3	75.7143	81.3665	70	161	53	131	10.861	8.498	0.353962	0.426185	0.464634	1	0.713965	0.374546	1	1	K01436
E1	E3	100	100	70	161	70	161	5.407	6.956	-0.36343	0.00504207	0.0167431	1		1	1	1	K01438
E1	E3	100	100	70	161	70	161	14.8695	12.329	0.2703	0.000768981	0.00313384	1		1	1	1	K01439
E1	E3	100	100	70	161	70	161	53.5105	46.679	0.197048	0.0244269	0.0626888	1		1	1	1	K01442
E1	E3	100	100	70	161	70	161	26.6635	22.184	0.265347	0.00133431	0.00513003	1		1	1	1	K01443
E1	E3	98.5714	100	70	161	69	161	51.224	63.591	-0.312003	0.00272077	0.00967017	1	0	0.30303	0.899109	1	K01447
E1	E3	100	100	70	161	70	161	24.9025	22.597	0.140159	0.0850073	0.163878	1		1	1	1	K01448
E1	E3	98.5714	99.3789	70	161	69	160	19.77	15.0145	0.396956	0.0160838	0.0448611	1	0.43125	0.515152	1	1	K01449
E1	E3	87.1429	96.2733	70	161	61	155	4.361	3.816	0.192598	0.258437	0.353444	1	0.262366	0.017019	0.114113	1	K01451
E1	E3	54.2857	49.6894	70	161	38	80	3.144	2.3435	0.423936	0.0468935	0.104009	1	1.20234	0.56803	1	1	K01455
E1	E3	52.8571	55.2795	70	161	37	89	1.517	1.142	0.409658	0.464581	0.48397	1	0.907048	0.774659	1	1	K01460
E1	E3	100	100	70	161	70	161	22.8715	19.477	0.23178	0.00521636	0.0172749	1		1	1	1	K01462
E1	E3	100	100	70	161	70	161	10.443	10.54	-0.0133386	0.291697	0.37977	1		1	1	1	K01464
E1	E3	100	100	70	161	70	161	18.178	17.756	0.0338869	0.105251	0.191338	1		1	1	1	K01465
E1	E3	74.2857	62.7329	70	161	52	101	2.8525	2.102	0.440464	0.00698718	0.0222825	1	1.71617	0.0974624	0.431079	1	K01466
E1	E3	41.4286	53.4161	70	161	29	86	0.529	0.642	-0.279306	0.0627059	0.129543	1	0.616846	0.115302	0.479712	1	K01467
E1	E3	100	100	70	161	70	161	29.7535	28.198	0.0774665	0.482485	0.492636	1		1	1	1	K01468
E1	E3	100	100	70	161	70	161	17.649	14.209	0.312781	0.00266741	0.0095026	1		1	1	1	K01470
E1	E3	97.1429	98.1366	70	161	68	158	7.385	9.2335	-0.32228	0.0938295	0.175924	1	0.64557	0.640307	1	1	K01476
E1	E3	100	100	70	161	70	161	2.07	2.268	-0.13179	0.221555	0.321236	1		1	1	1	K01478
E1	E3	24.2857	21.7391	70	161	17	35	0.614	0.851	-0.47092	0.379743	0.437787	1	1.15472	0.732286	1	1	K01479
E1	E3	100	100	70	161	70	161	47.0165	38.928	0.272359	0.00411417	0.0140235	1		1	1	1	K01480
E1	E3	81.4286	80.7453	70	161	57	130	2.455	2.3755	0.0474918	0.426659	0.464785	1	1.04556	1	1	1	K01482
E1	E3	24.2857	41.6149	70	161	17	67	1.067	1.065	0.00270675	0.00764131	0.0240363	1	0.450014	0.0119279	0.0846664	1	K01483
E1	E3	20	38.5093	70	161	14	62	0.6465	0.621	0.0580571	0.0052444	0.0173583	1	0.399194	0.00612491	0.0480177	1	K01484
E1	E3	58.5714	74.5342	70	161	41	120	0.438	1.2725	-1.53866	9.4268e-05	0.000501914	1	0.483046	0.0193871	0.126474	1	K01485
E1	E3	100	100	70	161	70	161	25.7805	22.44	0.200208	0.00577178	0.0188892	1		1	1	1	K01486
E1	E3	100	99.3789	70	161	70	160	14.5115	14.313	0.0198706	0.381709	0.438989	1	inf	1	1	1	K01487
E1	E3	100	100	70	161	70	161	12.967	8.668	0.581074	0.000668006	0.00275817	1		1	1	1	K01488
E1	E3	100	100	70	161	70	161	25.094	20.096	0.320434	0.00196599	0.00723783	1		1	1	1	K01489
E1	E3	100	100	70	161	70	161	19.3375	18.82	0.0391347	0.393194	0.445578	1		1	1	1	K01491
E1	E3	100	100	70	161	70	161	26.335	24.651	0.0953353	0.0987674	0.182773	1		1	1	1	K01493
E1	E3	100	99.3789	70	161	70	160	2.8615	3.2445	-0.181225	0.0585445	0.122876	1	inf	1	1	1	K01494
E1	E3	100	100	70	161	70	161	16.742	15.654	0.0969405	0.0313998	0.0767078	1		1	1	1	K01495
E1	E3	100	100	70	161	70	161	5.6225	10.037	-0.836044	2.40639e-06	2.70996e-05	0.0294301		1	1	1	K01496
E1	E3	45.7143	54.6584	70	161	32	88	0.422	0.3685	0.195578	0.157355	0.255299	1	0.698565	0.251963	0.802226	1	K01497
E1	E3	25.7143	49.6894	70	161	18	80	5.022	14.8045	-1.5597	1.82543e-05	0.000134488	0.22325	0.350481	0.000814796	0.00941868	1	K01499
E1	E3	100	100	70	161	70	161	3.3265	4.014	-0.271036	0.0515182	0.111596	1		1	1	1	K01507
E1	E3	100	100	70	161	70	161	6.8715	4.677	0.555042	0.000361655	0.00159793	1		1	1	1	K01512
E1	E3	100	100	70	161	70	161	23.5635	20.764	0.182469	0.00714788	0.0227179	1		1	1	1	K01515
E1	E3	100	100	70	161	70	161	22.1255	18.225	0.279791	0.000479323	0.00205114	1		1	1	1	K01520
E1	E3	24.2857	39.1304	70	161	17	63	0.957	1.183	-0.305859	0.010647	0.0319463	1	0.498952	0.0350867	0.202411	1	K01521
E1	E3	98.5714	100	70	161	69	161	5.817	7.268	-0.321283	0.00922267	0.0282658	1	0	0.30303	0.899109	1	K01523
E1	E3	100	100	70	161	70	161	7.1685	8.073	-0.171434	0.0319334	0.0776741	1		1	1	1	K01524
E1	E3	47.1429	51.5528	70	161	33	83	0.528	0.686	-0.377671	0.204074	0.305076	1	0.838163	0.568947	1	1	K01525
E1	E3	84.2857	83.8509	70	161	59	135	1.066	0.748	0.511097	0.104392	0.190328	1	1.033	1	1	1	K01531
E1	E3	100	100	70	161	70	161	35.7375	31.746	0.170864	0.0553608	0.117689	1		1	1	1	K01533
E1	E3	100	100	70	161	70	161	26.8565	21.389	0.328402	0.000929997	0.00370726	1		1	1	1	K01534
E1	E3	100	100	70	161	70	161	16.1765	19.629	-0.279087	0.000351914	0.00156165	1		1	1	1	K01537
E1	E3	100	100	70	161	70	161	21.759	25.91	-0.251897	0.0137088	0.0393658	1		1	1	1	K01546
E1	E3	100	100	70	161	70	161	13.142	16.148	-0.297171	0.0050421	0.0167431	1		1	1	1	K01547
E1	E3	100	100	70	161	70	161	18.248	24.185	-0.406374	0.00693802	0.0221661	1		1	1	1	K01548
E1	E3	94.2857	96.2733	70	161	66	155	6.8865	8.608	-0.321907	0.0215658	0.056696	1	0.63871	0.495734	1	1	K01551
E1	E3	100	99.3789	70	161	70	160	9.2825	7.703	0.269093	0.0678329	0.137578	1	inf	1	1	1	K01560
E1	E3	100	99.3789	70	161	70	160	26.6575	22.0995	0.270528	0.0483195	0.10619	1	inf	1	1	1	K01567
E1	E3	100	100	70	161	70	161	37.626	33.77	0.155988	0.0197068	0.0526922	1		1	1	1	K01571
E1	E3	100	100	70	161	70	161	43.6845	39.45	0.147096	0.0863487	0.16581	1		1	1	1	K01572
E1	E3	92.8571	97.5155	70	161	65	157	19.634	17.583	0.159173	0.158795	0.256864	1	0.33121	0.134399	0.533321	1	K01573
E1	E3	45.7143	43.4783	70	161	32	70	1.284	0.65	0.982134	0.155086	0.252758	1	1.09474	0.774601	1	1	K01575
E1	E3	48.5714	55.9006	70	161	34	90	1.8985	3.12	-0.716686	0.0552443	0.117605	1	0.745062	0.318366	0.918532	1	K01577
E1	E3	100	100	70	161	70	161	29.036	27.187	0.0949258	0.320624	0.401313	1		1	1	1	K01579
E1	E3	100	100	70	161	70	161	28.2535	34.114	-0.271934	0.0132647	0.0382886	1		1	1	1	K01580
E1	E3	71.4286	66.4596	70	161	50	107	0.6245	0.484	0.367695	0.152436	0.249733	1	1.26168	0.539969	1	1	K01581
E1	E3	34.2857	50.3106	70	161	24	81	0.898	1.082	-0.268913	0.00775553	0.0243518	1	0.515298	0.0308604	0.182594	1	K01582
E1	E3	31.4286	43.4783	70	161	22	70	1.0605	1.389	-0.389302	0.0325439	0.0787987	1	0.595833	0.107569	0.460313	1	K01584
E1	E3	100	100	70	161	70	161	32.5555	36.662	-0.171384	0.0464153	0.103324	1		1	1	1	K01585
E1	E3	100	100	70	161	70	161	31.211	30.172	0.0488443	0.111629	0.200054	1		1	1	1	K01586
E1	E3	100	100	70	161	70	161	12.753	13.512	-0.0834046	0.391959	0.444928	1		1	1	1	K01588
E1	E3	100	100	70	161	70	161	4.7795	4.781	-0.000452705	0.228624	0.328103	1		1	1	1	K01589
E1	E3	57.1429	42.236	70	161	40	68	3.916	5.0645	-0.371039	0.0346992	0.0827719	1	1.82353	0.0446443	0.243858	1	K01590
E1	E3	100	100	70	161	70	161	26.3425	24.063	0.130576	0.0400352	0.0922266	1		1	1	1	K01591
E1	E3	97.1429	98.7578	70	161	68	159	3.313	3.019	0.134067	0.451829	0.478058	1	0.427673	0.586581	1	1	K01595
E1	E3	72.8571	92.5466	70	161	51	149	1.53	2.405	-0.652505	3.72157e-05	0.000233769	0.455148	0.216178	0.000209737	0.00388649	1	K01596
E1	E3	50	52.795	70	161	35	85	0.807	0.572	0.496554	0.365768	0.429263	1	0.894118	0.774735	1	1	K01597
E1	E3	77.1429	91.3043	70	161	54	147	2.4695	9.552	-1.95158	2.44764e-06	2.74321e-05	0.0299346	0.321429	0.00518384	0.0417094	1	K01598
E1	E3	100	100	70	161	70	161	9.6305	8.677	0.150414	0.0208613	0.0552357	1		1	1	1	K01599
E1	E3	100	100	70	161	70	161	7.958	6.918	0.202051	0.0119725	0.0352151	1		1	1	1	K01607
E1	E3	28.5714	44.0994	70	161	20	71	0.8755	0.937	-0.0979419	0.0158604	0.0443772	1	0.507042	0.0286286	0.173159	1	K01608
E1	E3	100	100	70	161	70	161	36.083	36.186	-0.00411235	0.47651	0.489972	1		1	1	1	K01609
E1	E3	100	100	70	161	70	161	24.116	17.957	0.425444	2.24487e-08	7.63201e-07	0.000274548		1	1	1	K01610
E1	E3	98.5714	98.1366	70	161	69	158	0.526	0.6395	-0.281882	0.141807	0.238097	1	1.31013	1	1	1	K01611
E1	E3	100	100	70	161	70	161	21.9135	20.565	0.0916289	0.157251	0.255165	1		1	1	1	K01613
E1	E3	100	96.8944	70	161	70	156	4.582	3.1015	0.563011	2.60499e-07	5.22349e-06	0.0031859	inf	0.326145	0.929561	1	K01615
E1	E3	100	100	70	161	70	161	22.3685	18.308	0.288994	0.000233081	0.00108635	1		1	1	1	K01619
E1	E3	100	100	70	161	70	161	41.9885	30.421	0.464927	7.97341e-05	0.000436698	0.975148		1	1	1	K01620
E1	E3	100	100	70	161	70	161	7.7765	5.641	0.46317	0.000903359	0.00361285	1		1	1	1	K01621
E1	E3	25.7143	51.5528	70	161	18	83	5.19	14.527	-1.48493	5.799e-06	5.49542e-05	0.0709218	0.325301	0.000291493	0.00463493	1	K01622
E1	E3	100	100	70	161	70	161	19.0735	16.437	0.214623	0.00344061	0.0119474	1		1	1	1	K01624
E1	E3	100	100	70	161	70	161	23.953	14.578	0.716414	1.13281e-08	4.26286e-07	0.000138543		1	1	1	K01625
E1	E3	100	100	70	161	70	161	15.1175	13.057	0.211396	0.0134851	0.0388237	1		1	1	1	K01626
E1	E3	100	100	70	161	70	161	4.81	7.682	-0.675445	3.45022e-06	3.64704e-05	0.0421962		1	1	1	K01627
E1	E3	100	100	70	161	70	161	5.4825	5.182	0.0813249	0.341595	0.415694	1		1	1	1	K01628
E1	E3	100	100	70	161	70	161	37.3855	28.188	0.407398	2.92027e-06	3.17089e-05	0.0357149		1	1	1	K01629
E1	E3	32.8571	49.6894	70	161	23	80	1.224	1.578	-0.366494	0.00600925	0.0195877	1	0.495479	0.0212444	0.135463	1	K01630
E1	E3	35.7143	47.205	70	161	25	76	1.545	1.948	-0.334387	0.0405729	0.0932719	1	0.621345	0.114443	0.47704	1	K01631
E1	E3	100	100	70	161	70	161	8.81	9.349	-0.08567	0.208106	0.308993	1		1	1	1	K01633
E1	E3	42.8571	45.9627	70	161	30	74	0.25	0.314	-0.328836	0.276009	0.367712	1	0.881757	0.773659	1	1	K01635
E1	E3	30	47.8261	70	161	21	77	0.541	0.672	-0.312833	0.00934027	0.0285579	1	0.467532	0.013778	0.0954563	1	K01637
E1	E3	37.1429	46.5839	70	161	26	75	0.437	0.662	-0.599198	0.0398569	0.0919197	1	0.677576	0.196864	0.701119	1	K01638
E1	E3	100	100	70	161	70	161	25.125	24.369	0.0440765	0.495299	0.498315	1		1	1	1	K01639
E1	E3	67.1429	47.8261	70	161	47	77	3.354	2.768	0.277039	0.00110258	0.00432197	1	2.22925	0.00950979	0.0698947	1	K01640
E1	E3	40	60.8696	70	161	28	98	0.9065	1.837	-1.01897	0.000125805	0.00064269	1	0.428571	0.00405082	0.033542	1	K01641
E1	E3	100	100	70	161	70	161	8.4175	5.698	0.562936	6.76654e-05	0.000382416	0.827548		1	1	1	K01643
E1	E3	100	100	70	161	70	161	6.5045	4.286	0.601806	0.00011206	0.000582692	1		1	1	1	K01644
E1	E3	100	98.1366	70	161	70	158	5	3.548	0.494922	0.000579359	0.00242076	1	inf	0.555379	1	1	K01646
E1	E3	100	100	70	161	70	161	49.864	40.212	0.310373	0.0149564	0.0421856	1		1	1	1	K01647
E1	E3	100	100	70	161	70	161	25.1385	25.188	-0.002838	0.363872	0.42827	1		1	1	1	K01649
E1	E3	100	100	70	161	70	161	20.808	18.591	0.162534	0.0427878	0.0971944	1		1	1	1	K01652
E1	E3	100	100	70	161	70	161	23.791	23.789	0.000121286	0.2651	0.358172	1		1	1	1	K01653
E1	E3	95.7143	89.441	70	161	67	144	19.735	12.8445	0.619606	0.0125633	0.0366791	1	2.63657	0.135217	0.536221	1	K01654
E1	E3	100	100	70	161	70	161	27.348	21.539	0.344484	0.000521205	0.00220184	1		1	1	1	K01657
E1	E3	100	100	70	161	70	161	34.963	31.23	0.162896	0.156223	0.253934	1		1	1	1	K01658
E1	E3	25.7143	42.236	70	161	18	68	0.9145	1.0405	-0.186222	0.0121993	0.0357735	1	0.473416	0.0182092	0.120377	1	K01659
E1	E3	100	100	70	161	70	161	4.99	4.01	0.315438	0.00160002	0.00600441	1		1	1	1	K01661
E1	E3	100	100	70	161	70	161	29.77	24.295	0.2932	0.00344061	0.0119474	1		1	1	1	K01662
E1	E3	94.2857	94.4099	70	161	66	152	7.149	6.7725	0.078053	0.49359	0.497632	1	0.976974	1	1	1	K01664
E1	E3	100	100	70	161	70	161	12.5965	15.383	-0.288314	0.0283513	0.0706473	1		1	1	1	K01665
E1	E3	100	100	70	161	70	161	19.385	16.031	0.274076	0.235818	0.334305	1		1	1	1	K01666
E1	E3	100	100	70	161	70	161	18.4625	29.726	-0.687127	1.48073e-06	1.83742e-05	0.0181093		1	1	1	K01667
E1	E3	88.5714	69.5652	70	161	62	112	5.514	3.959	0.477963	6.80994e-08	1.94592e-06	0.000832855	3.39062	0.00163357	0.0159701	1	K01668
E1	E3	24.2857	40.9938	70	161	17	66	0.754	0.574	0.393514	0.00815585	0.0254454	1	0.461692	0.0170067	0.114113	1	K01669
E1	E3	100	100	70	161	70	161	10.039	8.16	0.298975	0.00226576	0.00821773	1		1	1	1	K01673
E1	E3	62.8571	48.4472	70	161	44	78	1.1055	0.8855	0.320135	0.00720506	0.022864	1	1.80079	0.0462033	0.250806	1	K01674
E1	E3	100	100	70	161	70	161	21.0845	21.582	-0.0336458	0.0887341	0.169301	1		1	1	1	K01676
E1	E3	100	100	70	161	70	161	44.649	38.975	0.196079	0.00406241	0.0138548	1		1	1	1	K01677
E1	E3	100	100	70	161	70	161	18.797	13.739	0.452225	0.00078039	0.0031761	1		1	1	1	K01678
E1	E3	98.5714	99.3789	70	161	69	160	2.682	3.741	-0.480115	0.0032567	0.0113798	1	0.43125	0.515152	1	1	K01679
E1	E3	100	100	70	161	70	161	23.812	18.119	0.394185	4.59939e-05	0.000276009	0.562506		1	1	1	K01681
E1	E3	25.7143	42.236	70	161	18	68	0.764	0.7085	0.108805	0.00786743	0.0246651	1	0.473416	0.0182092	0.120377	1	K01682
E1	E3	100	95.6522	70	161	70	154	8.816	7.309	0.27045	0.00835522	0.0260011	1	inf	0.104771	0.452776	1	K01684
E1	E3	100	100	70	161	70	161	47.6575	37.144	0.359574	0.000360252	0.00159402	1		1	1	1	K01685
E1	E3	100	100	70	161	70	161	29.7955	23.546	0.339612	0.000566448	0.0023733	1		1	1	1	K01686
E1	E3	100	100	70	161	70	161	26.9055	25.305	0.0884786	0.0730334	0.145141	1		1	1	1	K01687
E1	E3	100	100	70	161	70	161	17.9715	16.016	0.166197	0.0515183	0.111596	1		1	1	1	K01689
E1	E3	34.2857	42.236	70	161	24	68	0.406	0.477	-0.23251	0.0671911	0.136594	1	0.713555	0.306453	0.902242	1	K01690
E1	E3	100	100	70	161	70	161	29.1305	28.366	0.0383677	0.2623	0.356316	1		1	1	1	K01693
E1	E3	100	100	70	161	70	161	28.0975	25.154	0.159654	0.0541732	0.115889	1		1	1	1	K01695
E1	E3	100	100	70	161	70	161	18.671	17.082	0.128322	0.122793	0.214812	1		1	1	1	K01696
E1	E3	88.5714	91.3043	70	161	62	147	11.4535	9.378	0.288436	0.232764	0.33159	1	0.738095	0.626041	1	1	K01697
E1	E3	100	100	70	161	70	161	12.575	16.212	-0.366504	0.00393554	0.0134634	1		1	1	1	K01698
E1	E3	100	100	70	161	70	161	31.11	28.454	0.128747	0.185262	0.286442	1		1	1	1	K01703
E1	E3	100	100	70	161	70	161	20.599	18.01	0.193776	0.022413	0.0585706	1		1	1	1	K01704
E1	E3	47.1429	49.0683	70	161	33	79	0.555	0.343	0.694279	0.469216	0.486087	1	0.925761	0.886198	1	1	K01706
E1	E3	44.2857	45.9627	70	161	31	74	0.926	0.453	1.0315	0.31734	0.39914	1	0.934511	0.885946	1	1	K01708
E1	E3	100	100	70	161	70	161	20.7425	21.157	-0.0285453	0.270745	0.363253	1		1	1	1	K01709
E1	E3	100	100	70	161	70	161	23.307	21.566	0.112005	0.109005	0.196338	1		1	1	1	K01710
E1	E3	100	100	70	161	70	161	16.6025	16.839	-0.020406	0.499145	0.49984	1		1	1	1	K01711
E1	E3	100	100	70	161	70	161	14.2645	15.978	-0.163658	0.0337394	0.0809719	1		1	1	1	K01712
E1	E3	100	100	70	161	70	161	24.1935	20.022	0.273033	0.012833	0.0373152	1		1	1	1	K01714
E1	E3	100	100	70	161	70	161	43.712	34.106	0.358004	4.72804e-06	4.67453e-05	0.057824		1	1	1	K01715
E1	E3	34.2857	46.5839	70	161	24	75	0.3005	0.366	-0.284479	0.0209509	0.055437	1	0.598261	0.111207	0.471263	1	K01716
E1	E3	100	100	70	161	70	161	26.1075	27.692	-0.0850049	0.226361	0.3259	1		1	1	1	K01719
E1	E3	25.7143	40.3727	70	161	18	65	0.558	0.571	-0.0332256	0.016033	0.0447885	1	0.511243	0.0371067	0.211175	1	K01720
E1	E3	90	88.1988	70	161	63	142	2.522	3.1045	-0.299793	0.416378	0.459381	1	1.20423	0.82237	1	1	K01725
E1	E3	97.1429	98.7578	70	161	68	159	60.1075	42.898	0.486635	0.0701073	0.140846	1	0.427673	0.586581	1	1	K01730
E1	E3	100	100	70	161	70	161	19.5205	16.088	0.279005	0.00443732	0.0149747	1		1	1	1	K01733
E1	E3	100	100	70	161	70	161	30.8535	24.369	0.340387	0.00415337	0.0141492	1		1	1	1	K01734
E1	E3	100	100	70	161	70	161	30.5255	29.486	0.0499848	0.331432	0.409074	1		1	1	1	K01735
E1	E3	100	100	70	161	70	161	19.958	18.566	0.104304	0.286206	0.375368	1		1	1	1	K01736
E1	E3	100	100	70	161	70	161	19.932	19.661	0.0197498	0.209336	0.31034	1		1	1	1	K01737
E1	E3	100	100	70	161	70	161	20.8445	17.592	0.244747	0.00634072	0.0205259	1		1	1	1	K01738
E1	E3	100	100	70	161	70	161	11.8845	7.838	0.600524	0.000601601	0.00250941	1		1	1	1	K01739
E1	E3	100	100	70	161	70	161	36.4305	32.178	0.179072	0.0439706	0.0992911	1		1	1	1	K01740
E1	E3	100	100	70	161	70	161	18.6435	19.324	-0.051721	0.42062	0.46199	1		1	1	1	K01744
E1	E3	100	100	70	161	70	161	35.411	34.49	0.0380195	0.401456	0.450928	1		1	1	1	K01745
E1	E3	100	100	70	161	70	161	14.07	16.976	-0.270874	0.0240608	0.0619765	1		1	1	1	K01749
E1	E3	91.4286	98.7578	70	161	64	159	6.847	6.284	0.123789	0.086343	0.16581	1	0.134172	0.0106313	0.0769355	1	K01750
E1	E3	100	100	70	161	70	161	9.318	7.208	0.370421	3.63027e-05	0.000229513	0.443982		1	1	1	K01751
E1	E3	100	100	70	161	70	161	22.2535	18.234	0.287401	0.00144138	0.00548307	1		1	1	1	K01752
E1	E3	95.7143	91.9255	70	161	67	148	5.439	5.3955	0.0115848	0.283628	0.373107	1	1.96171	0.403068	1	1	K01753
E1	E3	100	100	70	161	70	161	27.3625	25.831	0.0830966	0.129222	0.223093	1		1	1	1	K01754
E1	E3	100	100	70	161	70	161	24.4135	21.222	0.202119	0.000864717	0.00348107	1		1	1	1	K01755
E1	E3	100	100	70	161	70	161	19.812	18.04	0.135175	0.0518586	0.112114	1		1	1	1	K01756
E1	E3	35.7143	35.4037	70	161	25	57	2.555	2.508	0.0267859	0.468558	0.485921	1	1.01365	1	1	1	K01758
E1	E3	100	100	70	161	70	161	20.897	15.8	0.403371	0.000252527	0.00116632	1		1	1	1	K01759
E1	E3	95.7143	93.7888	70	161	67	151	3.073	3.162	-0.0411896	0.445044	0.474384	1	1.47903	0.759113	1	1	K01760
E1	E3	91.4286	94.4099	70	161	64	152	9.2185	9.8275	-0.0922924	0.356239	0.424516	1	0.631579	0.395815	1	1	K01761
E1	E3	45.7143	52.795	70	161	32	85	1.129	0.955	0.241473	0.145408	0.242082	1	0.752941	0.390423	1	1	K01766
E1	E3	100	100	70	161	70	161	18.344	16.887	0.119395	0.200814	0.302011	1		1	1	1	K01770
E1	E3	82.8571	74.5342	70	161	58	120	0.609	0.7465	-0.2937	0.350616	0.421594	1	1.65139	0.178317	0.656607	1	K01772
E1	E3	100	100	70	161	70	161	19.977	21.997	-0.138967	0.146182	0.242908	1		1	1	1	K01775
E1	E3	100	100	70	161	70	161	18.528	15.58	0.250012	0.00236661	0.00854297	1		1	1	1	K01776
E1	E3	100	100	70	161	70	161	21.42	18.512	0.210498	0.0179347	0.0488837	1		1	1	1	K01778
E1	E3	97.1429	96.2733	70	161	68	155	5.1795	3.839	0.432082	0.455224	0.479659	1	1.31613	1	1	1	K01779
E1	E3	24.2857	40.9938	70	161	17	66	0.971	0.6325	0.618406	0.0121962	0.0357735	1	0.461692	0.0170067	0.114113	1	K01782
E1	E3	100	100	70	161	70	161	20.337	19.223	0.0812734	0.104085	0.189909	1		1	1	1	K01783
E1	E3	100	100	70	161	70	161	24.809	21.373	0.215074	0.0106395	0.0319346	1		1	1	1	K01784
E1	E3	100	100	70	161	70	161	43.517	37.162	0.227751	0.0272568	0.0684778	1		1	1	1	K01785
E1	E3	100	100	70	161	70	161	16.871	10.824	0.640312	0.000383387	0.00168422	1		1	1	1	K01786
E1	E3	98.5714	100	70	161	69	161	49.022	53.904	-0.136963	0.0553608	0.117689	1	0	0.30303	0.899109	1	K01787
E1	E3	100	100	70	161	70	161	12.9055	9.051	0.511837	7.37847e-05	0.000409803	0.902386		1	1	1	K01788
E1	E3	100	100	70	161	70	161	24.8185	21.296	0.220833	0.000330554	0.001483	1		1	1	1	K01790
E1	E3	100	100	70	161	70	161	7.438	6.856	0.117548	0.418527	0.460636	1		1	1	1	K01791
E1	E3	97.1429	96.2733	70	161	68	155	5.698	13.009	-1.19098	0.00034367	0.00152935	1	1.31613	1	1	1	K01792
E1	E3	100	100	70	161	70	161	23.9795	21.195	0.178078	0.156736	0.2546	1		1	1	1	K01802
E1	E3	100	100	70	161	70	161	25.6075	23.236	0.140205	0.140848	0.236943	1		1	1	1	K01803
E1	E3	100	100	70	161	70	161	30.2435	21.454	0.495378	2.10628e-07	4.47219e-06	0.00257598		1	1	1	K01804
E1	E3	100	100	70	161	70	161	12.003	11.66	0.0418272	0.34989	0.421011	1		1	1	1	K01805
E1	E3	98.5714	96.8944	70	161	69	156	1.882	2.2575	-0.262459	0.0540539	0.115718	1	2.21154	0.670547	1	1	K01807
E1	E3	100	100	70	161	70	161	29.054	23.293	0.31884	0.000121881	0.000626569	1		1	1	1	K01808
E1	E3	100	100	70	161	70	161	14.8355	17.513	-0.239373	0.015658	0.0439114	1		1	1	1	K01809
E1	E3	100	100	70	161	70	161	27.1065	24.259	0.160119	0.0140886	0.0402105	1		1	1	1	K01810
E1	E3	100	100	70	161	70	161	42.4785	35.449	0.260988	0.038849	0.0902705	1		1	1	1	K01811
E1	E3	100	100	70	161	70	161	49.3065	40.332	0.289853	0.00575423	0.0188418	1		1	1	1	K01812
E1	E3	100	100	70	161	70	161	34.1315	27.89	0.291356	0.00479786	0.0160322	1		1	1	1	K01813
E1	E3	100	100	70	161	70	161	32.109	31.395	0.0324429	0.0511798	0.111099	1		1	1	1	K01814
E1	E3	100	100	70	161	70	161	81.9935	65.483	0.324389	0.0149564	0.0421856	1		1	1	1	K01815
E1	E3	92.8571	98.1366	70	161	65	158	3.971	4.3365	-0.127029	0.0452782	0.10142	1	0.246835	0.0570754	0.28976	1	K01816
E1	E3	100	100	70	161	70	161	25.4685	22.986	0.147959	0.2187	0.318417	1		1	1	1	K01817
E1	E3	100	100	70	161	70	161	42.147	37.219	0.179391	0.303197	0.388507	1		1	1	1	K01818
E1	E3	61.4286	54.0373	70	161	43	87	0.375	0.488	-0.379991	0.253853	0.349737	1	1.35462	0.315795	0.918173	1	K01819
E1	E3	78.5714	84.472	70	161	55	136	0.787	0.943	-0.260894	0.176449	0.277197	1	0.67402	0.343914	0.965138	1	K01821
E1	E3	84.2857	90.6832	70	161	59	146	1.335	1.743	-0.384733	0.0288933	0.0717057	1	0.551059	0.176713	0.652733	1	K01823
E1	E3	35.7143	45.3416	70	161	25	73	0.406	0.463	-0.189532	0.0571667	0.120733	1	0.669711	0.194041	0.69523	1	K01825
E1	E3	100	100	70	161	70	161	20.7025	19.069	0.118576	0.127426	0.220802	1		1	1	1	K01834
E1	E3	100	100	70	161	70	161	37.887	32.496	0.221441	0.0217364	0.0570954	1		1	1	1	K01835
E1	E3	98.5714	97.5155	70	161	69	157	4.65	3.217	0.531515	0.00137231	0.00525464	1	1.75796	1	1	1	K01838
E1	E3	100	100	70	161	70	161	24.8325	15.869	0.646018	6.64989e-07	1.00372e-05	0.00813281		1	1	1	K01839
E1	E3	100	100	70	161	70	161	15.7065	15.006	0.0658223	0.426493	0.464748	1		1	1	1	K01840
E1	E3	71.4286	75.1553	70	161	50	121	6.4425	5.446	0.242424	0.432212	0.467659	1	0.826446	0.624655	1	1	K01841
E1	E3	98.5714	100	70	161	69	161	29.996	35.644	-0.248889	0.0139356	0.0398767	1	0	0.30303	0.899109	1	K01843
E1	E3	94.2857	99.3789	70	161	66	160	6.049	8.4585	-0.483705	1.23258e-06	1.57518e-05	0.0150744	0.103125	0.0304378	0.180969	1	K01844
E1	E3	100	100	70	161	70	161	10.322	13.689	-0.407295	0.00499547	0.0166108	1		1	1	1	K01845
E1	E3	34.2857	68.9441	70	161	24	111	0.671	1.094	-0.705228	5.28474e-08	1.57526e-06	0.000646324	0.235018	1.25553e-06	0.00034898	0.0153551	K01846
E1	E3	100	100	70	161	70	161	17.833	28.066	-0.654274	2.13007e-07	4.49927e-06	0.00260508		1	1	1	K01847
[truncated: 11,423 more rows]
