# Supplementary material for: Blue poo: impact of gut transit time on the gut microbiome using a novel marker
Source: Gut. 2021 Mar 15;70(9):1665–74. doi: 10.1136/gutjnl-2020-323877 (PMC8349893; doi:10.1136/gutjnl-2020-323877)
Supplement: Supplementary data [file gutjnl-2020-323877supp006.xlsx]

## Sheet: Microbiome-related
Category	Spearman's correlation
Actinobacteria	0.0369647
Actinobacteria	0.0260742
Actinobacteria	0.0168322
Actinobacteria	-0.00400741
Actinobacteria	0.062599
Actinobacteria	-0.0748329
Actinobacteria	0.0647139
Actinobacteria	0.081205
Actinobacteria	0.0790977
Actinobacteria	0.0406817
Alpha diversity	0.190403
Alpha diversity	0.186871
Bacteroidetes	-0.0455295
Bacteroidetes	0.0668292
Bacteroidetes	0.00784676
Bacteroidetes	0.156416
Bacteroidetes	-0.0216557
Bacteroidetes	0.0334142
Bacteroidetes	0.127521
Bacteroidetes	0.0569783
Bacteroidetes	0.202826
Bacteroidetes	0.160877
Dietary pattern	0.273289
Dietary pattern	0.309051
Dietary pattern	0.254807
Dietary pattern	0.313127
Dietary pattern	0.332728
Dietary pattern	0.310158
Dietary pattern	0.367262
Dietary pattern	0.172884
Dietary pattern	0.122918
Dietary pattern	0.212148
Dietary pattern	0.154036
Dietary pattern	0.25477
Dietary pattern	0.321149
Firmicutes	-0.0994851
Firmicutes	-0.0848135
Firmicutes	0.0669083
Firmicutes	-0.169167
Firmicutes	-0.118525
Firmicutes	0.0653445
Firmicutes	-0.062167
Firmicutes	-0.102447
Firmicutes	0.0176125
Firmicutes	0.00102815
Food group	0.202293
Food group	-0.0339904
Food group	0.179968
Food group	0.0878296
Food group	0.0634222
Food group	-0.0279987
Food group	0.175104
Food group	0.140092
Food group	0.0383609
Food group	0.285596
Food group	0.0568434
Food group	0.309381
Food group	0.181956
Food group	0.0189285
Food group	0.0941095
Food group	0.134235
Food group	0.386539
Food group	0.041513
Food group	0.161976
Food group	0.0884978
Food	0.0905975
Food	0.187866
Food	0.119685
Food	0.036943
Food	0.0672759
Food	-0.0206763
Food	0.208434
Food	0.0145757
Food	0.0894854
Food	0.0398669
Food	0.0712089
Food	0.126922
Food	-0.00368967
Food	0.0603195
Food	0.117631
Food	-0.00373473
Food	-0.00837647
Food	0.0983989
Food	0.0272275
Food	0.0579002
Food	0.005367
Food	0.0326624
Food	0.034258
Food	0.0292055
Food	-0.00522676
Food	0.207554
Food	0.125247
Food	0.0684345
Food	0.000472382
Food	0.221084
Food	0.0170054
Food	-0.027715
Food	0.0101512
Food	0.0442553
Food	0.00562747
Food	0.0552897
Food	0.00566908
Food	0.0574044
Food	-0.0283574
Food	0.102655
Food	0.101494
Food	0.104839
Food	0.0339288
Food	0.0606458
Food	0.0904956
Food	-0.0298934
Food	0.0343962
Food	0.0923521
Food	0.061946
Food	0.00710187
Food	0.0539221
Food	0.0129612
Food	0.178728
Food	0.170799
Food	0.0177915
Food	0.0220018
Food	0.0749285
Food	0.0528664
Food	0.087502
Food	0.15956
Food	0.00241375
Food	-0.0678003
Food	-0.052706
Food	-0.0218791
Food	-0.0639883
Food	0.0240573
Food	0.0127204
Food	-0.00608747
Food	0.425443
Food	-0.0160607
Food	0.00298348
Food	0.0789506
Food	0.0373457
Food	0.00269018
Food	0.216758
Food	0.00422016
Food	0.039132
Food	0.0290421
Food	-0.0517805
Food	0.111756
Food	-0.0149101
Food	0.123349
Food	0.0121825
Food	-0.0288537
Food	0.0700336
Food	0.0902574
Food	0.0741014
Food	-0.0208398
Food	0.0205472
Food	0.259505
Food	0.115854
Food	0.137832
Food	0.056442
Food	-0.00268511
Food	0.00652778
Food	0.0423379
Food	0.121443
Food	0.104877
Food	0.0383973
Food	-0.0124481
Food	0.0994986
Food	-0.00737424
Food	-0.0079307
Food	-0.0221411
Food	0.000463528
Food	0.155192
Food	0.0516621
Food	0.0183853
Food	-0.0284029
Food	0.0337913
Food	0.0421622
Food	0.0288363
Food	-0.00224884
Food	0.037993
Food	0.056033
Food	0.0476007
Food	0.0789067
Food	0.138217
Food	0.111015
Food	0.2173
Food	0.0862312
Food	0.0472033
Food	0.0154739
Food	0.160413
Food	-0.0395248
Food	0.035137
Food	-0.0190351
Food	0.00191666
Food	0.153283
Food	0.0616736
Food	0.00105977
Food	0.00467734
Food	0.183508
Food	-0.0132991
Food	0.193697
Food	0.146263
Food	0.0737889
Food	0.040145
Food	0.017191
Food	0.0719778
Food	0.0273053
Food	0.00588263
Food	-0.00593287
Food	0.063701
Food	0.135573
Food	0.150542
Food	0.0752791
Health markers	0.223263
Health markers	0.273289
Health markers	0.310158
Health markers	0.332728
Health markers	0.293524
Health markers	0.301715
Health markers	0.317785
Health markers	0.200815
Health markers	0.349005
Health markers	0.199833
Health markers	0.321149
Health markers	0.213362
Health markers	0.285699
Health markers	0.309858
Health markers	0.13177
Health markers	0.238812
Health markers	0.152443
Health markers	0.311674
Health markers	0.31971
ML regression	0.340815
ML regression	0.441371
ML regression	0.314598
ML regression	0.457957
ML regression	0.373646
ML regression	0.366308
ML regression	0.403988
ML regression	0.335097
ML regression	0.431503
ML regression	0.355647
ML regression	0.544759
ML regression	0.358453
ML regression	0.432567
ML regression	0.437339
ML regression	0.42487
ML regression	0.459089
ML regression	0.40012
ML regression	0.398425
ML regression	0.427945
ML regression	0.409566
ML regression	0.488351
ML regression	0.413851
ML regression	0.436383
ML regression	0.3737
ML regression	0.391525
ML regression	0.428735
ML regression	0.453167
ML regression	0.345552
ML regression	0.44316
ML regression	0.413938
ML regression	0.423772
ML regression	0.433824
ML regression	0.379743
ML regression	0.434453
ML regression	0.410418
ML regression	0.304741
ML regression	0.389418
ML regression	0.297347
ML regression	0.322074
ML regression	0.505913
ML regression	0.44572
ML regression	0.34759
ML regression	0.474689
ML regression	0.338482
ML regression	0.461283
ML regression	0.371528
ML regression	0.394006
ML regression	0.31983
ML regression	0.468199
ML regression	0.420783
ML regression	0.474757
ML regression	0.404721
ML regression	0.375937
ML regression	0.375581
ML regression	0.3728
ML regression	0.352635
ML regression	0.400236
ML regression	0.30762
ML regression	0.387363
ML regression	0.384039
ML regression	0.47647
ML regression	0.336459
ML regression	0.417118
ML regression	0.427944
ML regression	0.402327
ML regression	0.337901
ML regression	0.412209
ML regression	0.484113
ML regression	0.387304
ML regression	0.285027
ML regression	0.350911
ML regression	0.382846
ML regression	0.465461
ML regression	0.371155
ML regression	0.411366
ML regression	0.466768
ML regression	0.382181
ML regression	0.35256
ML regression	0.415277
ML regression	0.412976
ML regression	0.379862
ML regression	0.417182
ML regression	0.435196
ML regression	0.407129
ML regression	0.462067
ML regression	0.343769
ML regression	0.306966
ML regression	0.43982
ML regression	0.387322
ML regression	0.447622
ML regression	0.417131
ML regression	0.335314
ML regression	0.39083
ML regression	0.371285
ML regression	0.354831
ML regression	0.412881
ML regression	0.410609
ML regression	0.500418
ML regression	0.419079
ML regression	0.453057
Nutrients %E	0.00290687
Nutrients %E	0.0894058
Nutrients %E	0.232505
Nutrients %E	0.136277
Nutrients %E	0.324205
Nutrients %E	0.0950771
Nutrients %E	0.150338
Nutrients %E	0.21815
Nutrients %E	0.267246
Nutrients %E	0.194846
Nutrients %E	0.195345
Nutrients %E	0.335231
Nutrients %E	0.0831119
Nutrients %E	0.0308289
Nutrients %E	0.159411
Nutrients %E	0.0442645
Nutrients %E	0.296375
Nutrients %E	0.190193
Nutrients %E	0.174858
Nutrients %E	0.245118
Nutrients %E	0.369216
Nutrients %E	0.232316
Nutrients %E	0.16864
Nutrients %E	0.172561
Nutrients %E	0.153983
Nutrients %E	0.233873
Nutrients %E	0.281059
Nutrients %E	0.2264
Nutrients %E	0.174929
Nutrients %E	0.0591383
Nutrients %E	0.242354
Nutrients %E	0.0282729
Nutrients %E	0.170224
Nutrients %E	0.0210592
Nutrients %E	0.00130776
Nutrients %E	0.0213254
Nutrients %E	0.152265
Nutrients %E	0.130028
Nutrients %E	0.0578718
Nutrients %E	0.141742
Nutrients %E	0.0950256
Nutrients %E	0.260118
Nutrients %E	0.146344
Nutrients	0.0345004
Nutrients	0.106188
Nutrients	0.128283
Nutrients	0.0886374
Nutrients	0.303213
Nutrients	0.0309114
Nutrients	0.136777
Nutrients	0.084804
Nutrients	0.0808702
Nutrients	0.0641382
Nutrients	0.0643154
Nutrients	0.0680949
Nutrients	0.0869586
Nutrients	0.00837863
Nutrients	0.13109
Nutrients	0.17537
Nutrients	0.207975
Nutrients	0.0340808
Nutrients	0.10169
Nutrients	0.12018
Nutrients	0.242179
Nutrients	0.177119
Nutrients	0.02486
Nutrients	0.158691
Nutrients	0.100002
Nutrients	0.0949464
Nutrients	0.185501
Nutrients	0.134068
Nutrients	0.108212
Nutrients	0.0156039
Nutrients	0.194255
Nutrients	0.0102678
Nutrients	0.125625
Nutrients	0.0208144
Nutrients	0.0214995
Nutrients	0.0714232
Nutrients	0.128887
Nutrients	0.103097
Nutrients	0.0787738
Nutrients	0.144144
Nutrients	0.0937454
Nutrients	0.113584
Nutrients	0.118124
Proteobacteria	0.174301
Proteobacteria	0.00548461
Proteobacteria	0.126095
Proteobacteria	0.0264966
Proteobacteria	0.153963
Proteobacteria	-0.0279894
Proteobacteria	-0.00715039
Proteobacteria	-0.0186873
Proteobacteria	-0.12717
Proteobacteria	0.0105313
Verrucomicrobia	0.263766
Verrucomicrobia	0.0323019

## Sheet: Diet-related
Category	Spearman's correlation
Dietary pattern	-0.0426044
Dietary pattern	0.0690646
Dietary pattern	-0.0208737
Dietary pattern	-0.0798472
Dietary pattern	-0.0115799
Dietary pattern	-0.0386419
Dietary pattern	-0.0239903
Dietary pattern	-0.021132
Dietary pattern	0.00268077
Dietary pattern	-0.0878743
Dietary pattern	0.0474119
Dietary pattern	-0.00499784
Dietary pattern	-0.0263818
Food	0.0660692
Food	-0.0195852
Food	0.0082444
Food	-0.0117058
Food	0.0665879
Food	-0.0806795
Food	0.0631849
Food	-0.131952
Food	-0.0364989
Food	0.0604483
Food	0.02021
Food	-0.000211152
Food	0.0266304
Food	-0.038157
Food	-0.0517689
Food	-0.0669035
Food	0.0817506
Food	0.0736631
Food	-0.00102175
Food	0.0515438
Food	0.00334421
Food	0.110801
Food	-0.0220794
Food	-0.0192773
Food	0.0138488
Food	0.0559461
Food	-0.0441665
Food	0.0667927
Food	-0.0577663
Food	-0.035695
Food	0.011338
Food	0.0348368
Food	0.00847598
Food	0.0534331
Food	-0.011155
Food	0.00899512
Food	0.0294504
Food	0.0363035
Food	-0.00964513
Food	-0.0116836
Food	0.0203642
Food	0.0683564
Food	0.0631842
Food	-0.0218189
Food	-0.0131395
Food	-0.0544764
Food	-0.0653375
Food	0.0219408
Food	0.0053093
Food	-0.0518139
Food	0.0334447
Food	-0.00296789
Food	0.0135231
Food	-0.081664
Food	0.0330183
Food	0.000729792
Food	0.027966
Food	-0.0451948
Food	-0.0776056
Food	-0.00899732
Food	0.0161361
Food	0.0282067
Food	0.0585052
Food	-6.71985e-05
Food	0.00165946
Food	0.0283361
Food	0.101437
Food	0.0270887
Food	-0.025848
Food	0.0816297
Food	-0.0719921
Food	-0.0192384
Food	0.032699
Food	0.0292321
Food	-0.100933
Food	0.0214225
Food	0.010486
Food	0.0529994
Food	0.0351857
Food	0.0863852
Food	-0.0835461
Food	0.0027128
Food	0.0127077
Food	0.0230079
Food	0.0715404
Food	0.00546164
Food	-0.0101782
Food	-0.00546312
Food	-0.102473
Food	-0.0587901
Food	-0.0158839
Food	-0.0573704
Food	0.0368155
Food	-0.0156713
Food	0.00738583
Food	0.039117
Food	0.0533191
Food	-0.0346102
Food	0.103203
Food	0.0236598
Food	-0.0289493
Food	-0.00821996
Food	-0.0303524
Food	-0.0263096
Food	0.0493895
Food	-0.00288729
Food	0.0475444
Food	-0.0676028
Food	0.0509525
Food	0.0595568
Food	0.0171819
Food	0.085832
Food	0.0357748
Food	0.0147748
Food	0.0481965
Food	0.00528065
Food	0.0390361
Food	0.0349237
Food	0.00206064
Food	-0.0231442
Food	0.00383245
Food	0.0109015
Food	-0.0124647
Food	-0.0455817
Food	-0.062055
Food	0.0277944
Food	0.014159
Food	0.0317899
Food	0.0095054
Food	-0.0284524
Food	0.0156231
Food	-0.0583434
Food	0.100637
Food	0.0861935
Food	-0.0205802
Food	-0.0980925
Food	0.00420463
Food	0.0873168
Food	0.0388009
Food	-0.011127
Food	-0.00839044
Food	-0.00404498
Food	0.00367892
Food	0.0473643
Food	-0.02061
Food	-0.0827065
Food	-0.00435298
Food group	-0.117613
Food group	-0.0446059
Food group	0.125441
Food group	0.00190189
Food group	-0.0178353
Food group	-0.0617856
Food group	0.0756247
Food group	-0.0287457
Food group	0.0308422
Food group	0.0158855
Food group	-0.0117017
Food group	-0.0634797
Food group	-0.00477369
Food group	-0.0144005
Food group	0.0138284
Food group	0.0541465
Food group	-0.00624156
Food group	0.0410048
Food group	-0.00718232
Food group	0.0190714
Health markers	-0.0690724
Health markers	-0.0426044
Health markers	0.147895
Health markers	-0.0718294
Health markers	-0.0713802
Health markers	0.0971003
Health markers	0.092229
Health markers	-0.0115799
Health markers	-0.0386419
Health markers	-0.100674
Health markers	0.024721
Health markers	0.00902961
Health markers	-0.0267148
Health markers	0.0170993
Health markers	-0.0120712
Health markers	-0.0199588
Health markers	-0.0263818
Health markers	-0.082638
Health markers	-0.0762628
Nutrients	-0.00252125
Nutrients	-0.0176419
Nutrients	0.0433243
Nutrients	0.051699
Nutrients	0.127432
Nutrients	0.0525949
Nutrients	0.119047
Nutrients	0.0405755
Nutrients	-0.021956
Nutrients	0.0385452
Nutrients	0.0688344
Nutrients	0.0355472
Nutrients	-0.0164849
Nutrients	0.0272902
Nutrients	0.00485334
Nutrients	-0.00658058
Nutrients	0.0452263
Nutrients	-0.00354394
Nutrients	0.00874315
Nutrients	-0.0106567
Nutrients	0.00456493
Nutrients	0.053201
Nutrients	0.00347416
Nutrients	-0.0272208
Nutrients	0.0291374
Nutrients	0.0201326
Nutrients	0.00300743
Nutrients	0.00160767
Nutrients	0.0186867
Nutrients	-0.0100188
Nutrients	-0.041783
Nutrients	-0.00955221
Nutrients	0.0250917
Nutrients	0.044048
Nutrients	0.0087278
Nutrients	-0.00108193
Nutrients	0.0225429
Nutrients	0.0629261
Nutrients	0.0256818
Nutrients	0.0237555
Nutrients	0.0378121
Nutrients	0.068278
Nutrients	0.0283905
Nutrients %E	-0.0024952
Nutrients %E	-0.0400374
Nutrients %E	0.0564027
Nutrients %E	0.0433775
Nutrients %E	0.117899
Nutrients %E	0.0511749
Nutrients %E	0.117857
Nutrients %E	0.0438099
Nutrients %E	-0.0384699
Nutrients %E	0.0583242
Nutrients %E	0.0952233
Nutrients %E	0.058986
Nutrients %E	-0.037615
Nutrients %E	0.0115192
Nutrients %E	-0.00380033
Nutrients %E	-0.0238902
Nutrients %E	0.0373733
Nutrients %E	-0.0187395
Nutrients %E	0.0212165
Nutrients %E	-0.0277791
Nutrients %E	-0.00503451
Nutrients %E	0.058604
Nutrients %E	-0.0132788
Nutrients %E	-0.0443581
Nutrients %E	0.018331
Nutrients %E	0.0211858
Nutrients %E	-0.000655091
Nutrients %E	-0.00232042
Nutrients %E	0.0133373
Nutrients %E	-0.0290099
Nutrients %E	-0.0574075
Nutrients %E	-0.0268698
Nutrients %E	0.0224555
Nutrients %E	0.00189259
Nutrients %E	0.0337279
Nutrients %E	-0.0106305
Nutrients %E	0.0306578
Nutrients %E	0.0853011
Nutrients %E	0.0257879
Nutrients %E	0.016011
Nutrients %E	0.0408505
Nutrients %E	0.0798911
Nutrients %E	0.0177613
