# Supplementary material for: Blue poo: impact of gut transit time on the gut microbiome using a novel marker
Source: Gut. 2021 Mar 15;70(9):1665–74. doi: 10.1136/gutjnl-2020-323877 (PMC8349893; doi:10.1136/gutjnl-2020-323877)
Supplement: Supplementary data [file gutjnl-2020-323877supp007.xlsx]

## Sheet: ML performances
Marker	Median AUC		Difference
	Species relative abundances	Species relative abundances + transit time
aMED	0.676575	0.673954	-0.0026208
ASCVD	0.642578	0.603858	-0.0387196
GlycA	0.727482	0.726824	-0.000657462
GlycA 6h	0.72961	0.724969	-0.00464084
HDL-D	0.72008	0.710881	-0.00919912
HDL-D 6h	0.730727	0.727679	-0.00304755
HEI	0.735573	0.730592	-0.00498117
HFD	0.720725	0.709682	-0.0110433
Live Fat probab.	0.670762	0.677568	0.006806
Meal 1 B C-pep. 2h	0.67449	0.670139	-0.00435091
Meal 1 B Gluc. 2h	0.564772	0.566845	0.00207317
Meal 1 B Trig. 6h	0.644775	0.635306	-0.00946947
PUFA/FA	0.732906	0.729126	-0.00378041
QUICKI	0.682939	0.676036	-0.00690335
TG	0.716497	0.711443	-0.00505367
uPDI	0.710088	0.705329	-0.0047589
Visceral fat	0.768242	0.762425	-0.00581696
VLDL-D	0.739974	0.727975	-0.0119987
VLDL-D 6h	0.746191	0.73994	-0.00625135
