# Supplementary material for: Blue poo: impact of gut transit time on the gut microbiome using a novel marker
Source: Gut. 2021 Mar 15;70(9):1665–74. doi: 10.1136/gutjnl-2020-323877 (PMC8349893; doi:10.1136/gutjnl-2020-323877)
Supplement: Supplementary data [file gutjnl-2020-323877supp008.xlsx]

## Sheet: Sheet1
Variables in the structural equation models			Standardized beta	Standard	P-value
				error
hei_score	--->	transit_time	0.008	0.037	0.839
hei_score	--->	microbiome	-0.015	0.006	0.014
transit_time	--->	microbiome	0.987	0.006	<0.001
hei_score	--->	Blood pressure	-0.159	0.034	<0.001
hei_score	--->	visceral_fat	-0.215	0.038	<0.001
hei_score	--->	Inflammation	-0.161	0.03	<0.001
hei_score	--->	PeakTG_Glu	-0.124	0.03	0.001
transit_time	--->	Blood pressure	0.338	0.205	0.124
transit_time	--->	visceral_fat	0.829	0.224	<0.001
transit_time	--->	Inflammation	0.226	0.181	0.299
transit_time	--->	PeakTG_Glu	0.687	0.179	0.003
microbiome	--->	Blood pressure	-0.354	0.205	0.107
microbiome	--->	visceral_fat	-0.873	0.224	<0.001
microbiome	--->	Inflammation	-0.294	0.181	0.177
microbiome	--->	PeakTG_Glu	-0.676	0.179	0.003
